# Supplementary material for: Middle Miocene climate of southwestern Anatolia from multiple botanical proxies
Source: Copernicus journal article supplement (doi:10.5194/cp-2018-76), 2018-07-09

Tinaz section (Bouchal et al. 2017)

| NRM no. | GYM%  | A ANGIOS% | NA ANGIOS% | FERN% | GYM+A ANGIO | FERN+NA ANCA | A ANGIOS% | NA ANGIOS% |       |
|---------|-------|-----------|------------|-------|-------------|--------------|-----------|------------|-------|
| S153594 | 46,5  | 24,75     | 8,25       | 13,25 | 76,82       | 23,18        | 75,00     | 25,00      | PZ1   |
| S153595 | 42    | 48,75     | 3          | 4,25  | 92,60       | 7,40         | 94,20     | 5,80       |       |
| S153596 | 0     | 0         | 0          | 0     | 0,00        | 0,00         | 0,00      | 0,00       |       |
| S153597 | 0     | 0         | 0          | 0     | 0,00        | 0,00         | 0,00      | 0,00       |       |
| S153598 | 3,25  | 16,25     | 5,25       | 59,75 | 23,08       | 76,92        | 75,58     | 24,42      |       |
| S153599 | 26,25 | 46,75     | 8,25       | 12,25 | 78,07       | 21,93        | 85,00     | 15,00      | PZ2   |
| S153600 | 0     | 0         | 0          | 0     | 0,00        | 0,00         | 0,00      | 0,00       |       |
| S153601 | 9,75  | 32,75     | 27,75      | 3     | 58,02       | 41,98        | 54,13     | 45,87      |       |
| S153602 | 39,5  | 51,75     | 6,25       | 2     | 91,71       | 8,29         | 89,22     | 10,78      |       |
| S153603 | 34,25 | 38        | 23,25      | 2,25  | 73,91       | 26,09        | 62,04     | 37,96      |       |
| S153604 | 34,25 | 56        | 8,5        | 1,25  | 90,25       | 9,75         | 86,82     | 13,18      | PZ2-3 |
| S153605 | 13    | 23        | 57,25      | 2,75  | 37,50       | 62,50        | 28,66     | 71,34      |       |
| S153606 | 11,75 | 39,25     | 46         | 0,5   | 52,31       | 47,69        | 46,04     | 53,96      |       |
| S153607 | 0     | 0         | 0          | 0     | 0,00        | 0,00         | 0,00      | 0,00       |       |
| S153608 | 10    | 13,5      | 57,5       | 4,5   | 27,49       | 72,51        | 19,01     | 80,99      |       |
| S153609 | 0     | 0         | 0          | 0     | 0,00        | 0,00         | 0,00      | 0,00       | PZ3   |
| S153610 | 21,75 | 28,75     | 28,25      | 4,25  | 60,84       | 39,16        | 50,44     | 49,56      |       |
| S153611 | 0     | 0         | 0          | 0     | 0,00        | 0,00         | 0,00      | 0,00       |       |
| S153612 | 0     | 0         | 0          | 0     | 0,00        | 0,00         | 0,00      | 0,00       |       |
| S153613 | 0     | 0         | 0          | 0     | 0,00        | 0,00         | 0,00      | 0,00       |       |
| S153614 | 0     | 0         | 0          | 0     | 0,00        | 0,00         | 0,00      | 0,00       | PZ1   |
| S153615 | 0     | 0         | 0          | 0     | 0,00        | 0,00         | 0,00      | 0,00       |       |
| S153616 | 0     | 0         | 0          | 0     | 0,00        | 0,00         | 0,00      | 0,00       |       |
| S153617 | 7,75  | 13        | 65,25      | 12    | 21,17       | 78,83        | 16,61     | 83,39      |       |
| S153618 | 0     | 0         | 0          | 0     | 0,00        | 0,00         | 0,00      | 0,00       |       |
| S153619 | 0     | 0         | 0          | 0     | 0,00        | 0,00         | 0,00      | 0,00       |       |
| S153620 | 0     | 0         | 0          | 0     | 0,00        | 0,00         | 0,00      | 0,00       |       |

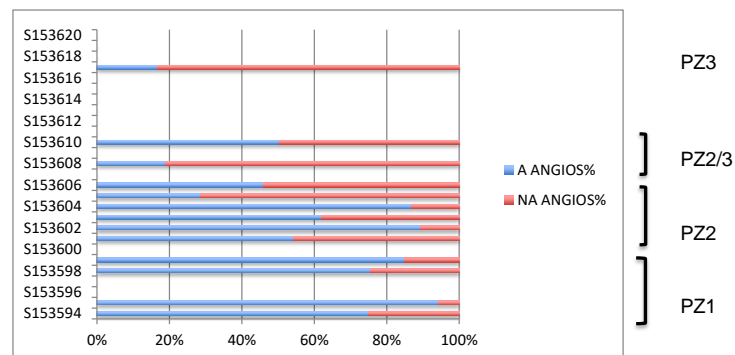

Eskihisar section (Bouchal et al. 2016)

| NRM no. | GYM%  | A ANGIOS% | NA ANGIOS% | FERN% | GYM+A ANGIO | FERN+NA ANCI | A ANGIOS% | NA ANGIOS% |     |
|---------|-------|-----------|------------|-------|-------------|--------------|-----------|------------|-----|
| S153539 | 22,75 | 49        | 16         | 11,5  | 72,29       | 27,71        | 75,38     | 24,62      | PZ1 |
| S153540 | 26,75 | 47        | 13         | 11,75 | 74,87       | 25,13        | 78,33     | 21,67      |     |
| S153541 | 18,25 | 56,75     | 8          | 15,75 | 75,95       | 24,05        | 87,64     | 12,36      |     |
| S153542 | 22    | 48,5      | 13,75      | 14,5  | 71,39       | 28,61        | 77,91     | 22,09      |     |
| S153543 | 23    | 52,75     | 4,25       | 18,25 | 77,10       | 22,90        | 92,54     | 7,46       |     |
| S153545 | 15    | 39,5      | 7,5        | 35,25 | 56,04       | 43,96        | 84,04     | 15,96      |     |
| S153546 | 18,5  | 69,25     | 7,75       | 4,5   | 87,75       | 12,25        | 89,94     | 10,06      |     |
| S153547 | 27,75 | 40        | 4,25       | 28    | 67,75       | 32,25        | 90,40     | 9,60       |     |
| S153548 | 27,25 | 31,75     | 8,75       | 26,5  | 62,60       | 37,40        | 78,40     | 21,60      |     |
| S153549 | 0     | 0         | 0          | 0     | 0,00        | 0,00         | 0,00      | 0,00       |     |
| S153550 | 0     | 0         | 0          | 0     | 0,00        | 0,00         | 0,00      | 0,00       | PZ2 |
| S153551 | 0     | 0         | 0          | 0     | 0,00        | 0,00         | 0,00      | 0,00       |     |
| S153552 | 0     | 0         | 0          | 0     | 0,00        | 0,00         | 0,00      | 0,00       |     |
| S153553 | 31,5  | 60,75     | 4,75       | 3     | 92,25       | 7,75         | 92,75     | 7,25       |     |
| S153554 | 28,25 | 64        | 5,25       | 2,5   | 92,25       | 7,75         | 92,42     | 7,58       |     |
| S153555 | 28,75 | 64,25     | 5,5        | 1,5   | 93,00       | 7,00         | 92,11     | 7,89       |     |
| S153556 | 0     | 0         | 0          | 0     | 0,00        | 0,00         | 0,00      | 0,00       |     |
| S153557 | 0     | 0         | 0          | 0     | 0,00        | 0,00         | 0,00      | 0,00       |     |
| S153558 | 0     | 0         | 0          | 0     | 0,00        | 0,00         | 0,00      | 0,00       |     |
| S153559 | 16,75 | 80,25     | 3          | 0     | 97,00       | 3,00         | 96,40     | 3,60       |     |
| S153560 | 0     | 0         | 0          | 0     | 0,00        | 0,00         | 0,00      | 0,00       | PZ2 |
| S153561 | 0     | 0         | 0          | 0     | 0,00        | 0,00         | 0,00      | 0,00       |     |
| S153562 | 15,75 | 81        | 2,75       | 0,5   | 96,75       | 3,25         | 96,72     | 3,28       |     |
| S153563 | 0     | 0         | 0          | 0     | 0,00        | 0,00         | 0,00      | 0,00       |     |
| S153564 | 0     | 0         | 0          | 0     | 0,00        | 0,00         | 0,00      | 0,00       |     |
| S153565 | 41    | 41        | 18         | 0     | 82,00       | 18,00        | 69,49     | 30,51      |     |
| S153566 | 0     | 0         | 0          | 0     | 0,00        | 0,00         | 0,00      | 0,00       |     |
| S153567 | 36,75 | 45        | 18,25      | 0     | 81,75       | 18,25        | 71,15     | 28,85      |     |
| S153568 | 0     | 0         | 0          | 0     | 0,00        | 0,00         | 0,00      | 0,00       |     |
| S153569 | 0     | 0         | 0          | 0     | 0,00        | 0,00         | 0,00      | 0,00       |     |
| S153570 | 35,75 | 38,25     | 3,75       | 0,5   | 94,57       | 5,43         | 91,07     | 8,93       | PZ2 |
| S153571 | 30,75 | 31,25     | 4,75       | 1,25  | 91,18       | 8,82         | 86,81     | 13,19      |     |
| S153572 | 18,75 | 44,5      | 2,75       | 0,5   | 95,11       | 4,89         | 94,18     | 5,82       |     |
| S153573 | 13,25 | 15,75     | 3,5        | 0,5   | 87,88       | 12,12        | 81,82     | 18,18      |     |
| S153579 | 39    | 45,25     | 13,5       | 2,25  | 84,25       | 15,75        | 77,02     | 22,98      |     |
| S153581 | 12,25 | 17,75     | 18         | 0,5   | 61,86       | 38,14        | 49,65     | 50,35      |     |
| S153582 | 19,75 | 38        | 41,5       | 0,75  | 57,75       | 42,25        | 47,80     | 52,20      |     |
| S153583 | 0     | 0         | 0          | 0     | 0,00        | 0,00         | 0,00      | 0,00       |     |
| S153585 | 0     | 0         | 0          | 0     | 0,00        | 0,00         | 0,00      | 0,00       |     |
| S153586 | 0     | 0         | 0          | 0     | 0,00        | 0,00         | 0,00      | 0,00       |     |
| S153587 | 0     | 0         | 0          | 0     | 0,00        | 0,00         | 0,00      | 0,00       | PZ2 |
| S153588 | 0     | 0         | 0          | 0     | 0,00        | 0,00         | 0,00      | 0,00       |     |
| S153589 | 0     | 0         | 0          | 0     | 0,00        | 0,00         | 0,00      | 0,00       |     |
| S153590 | 48,75 | 30,5      | 18,25      | 0,5   | 80,87       | 19,13        | 62,56     | 37,44      |     |
| S153591 | 10,25 | 8,25      | 6,25       | 0     | 74,75       | 25,25        | 56,90     | 43,10      |     |
| S153592 | 46,5  | 43        | 9,5        | 1     | 89,50       | 10,50        | 81,90     | 18,10      |     |
| S153593 | 0     | 0         | 0          | 0     | 0,00        | 0,00         | 0,00      | 0,00       |     |

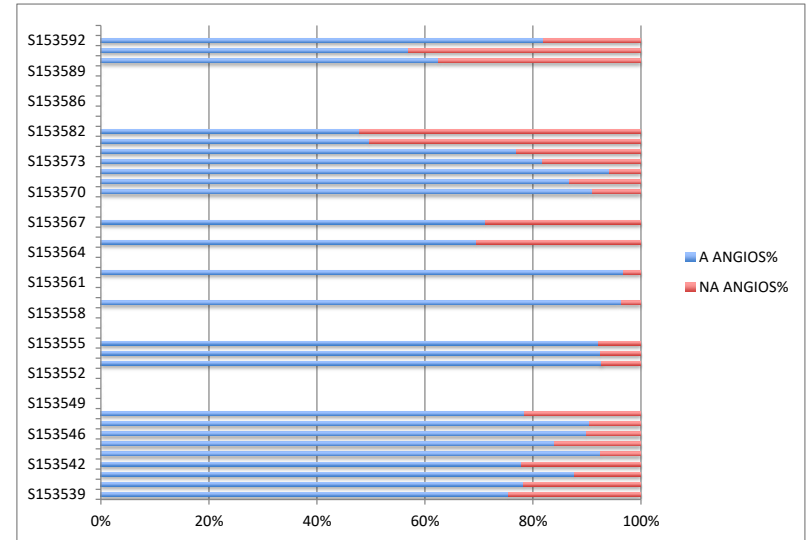

Salihpasalar section (this study)

| NRM no. | GYM%  | A ANGIOS% | NA ANGIOS% | FERN% | GYM+A ANGIO | FERN+NA ANCA | A ANGIOS% | NA ANGIOS% |
|---------|-------|-----------|------------|-------|-------------|--------------|-----------|------------|
| S153622 | 39,25 | 32,75     | 10,5       | 12    | 76,19       | 23,81        | 75,72     | 24,28      |
| S153623 | 25,25 | 43        | 18         | 7,75  | 72,61       | 27,39        | 70,49     | 29,51      |
| S153624 | 0     | 0         | 0          | 0     | 0,00        | 0,00         | 0,00      | 0,00       |
| S153625 | 0     | 0         | 0          | 0     | 0,00        | 0,00         | 0,00      | 0,00       |
| S153626 | 14,5  | 62,25     | 8,5        | 14    | 77,33       | 22,67        | 87,99     | 12,01      |
| S153627 | 35,25 | 38,25     | 8,75       | 11    | 78,82       | 21,18        | 81,38     | 18,62      |
| S153628 | 0     | 0         | 0          | 0     | 0,00        | 0,00         | 0,00      | 0,00       |
| S153629 | 22,5  | 45,75     | 4,75       | 1     | 92,23       | 7,77         | 90,59     | 9,41       |
| S153630 | 0     | 0         | 0          | 0     | 0,00        | 0,00         | 0,00      | 0,00       |
| S153631 | 29,25 | 53        | 10,5       | 0,75  | 87,97       | 12,03        | 83,46     | 16,54      |
| S153632 | 27,25 | 64        | 8,25       | 0,5   | 91,25       | 8,75         | 88,58     | 11,42      |
| S153633 | 0     | 0         | 0          | 0     | 0,00        | 0,00         | 0,00      | 0,00       |
| S153634 | 38,5  | 48,25     | 10,5       | 1,25  | 88,07       | 11,93        | 82,13     | 17,87      |
| S153635 | 18    | 72        | 7,25       | 1,5   | 91,14       | 8,86         | 90,85     | 9,15       |
| S153636 | 28,5  | 61,25     | 5,75       | 1     | 93,01       | 6,99         | 91,42     | 8,58       |
| S153637 | 25    | 62,75     | 8,75       | 1,75  | 89,31       | 10,69        | 87,76     | 12,24      |
| S153638 | 0     | 0         | 0          | 0     | 0,00        | 0,00         | 0,00      | 0,00       |
| S153639 | 17,25 | 28,5      | 17,25      | 2     | 70,38       | 29,62        | 62,30     | 37,70      |
| S153640 | 30    | 46,25     | 9,75       | 2,75  | 85,92       | 14,08        | 82,59     | 17,41      |
| S153641 | 34    | 53        | 9          | 0,75  | 89,92       | 10,08        | 85,48     | 14,52      |
| S153642 | 0     | 0         | 0          | 0     | 0,00        | 0,00         | 0,00      | 0,00       |
| S153643 | 0     | 0         | 0          | 0     | 0,00        | 0,00         | 0,00      | 0,00       |
| S153644 | 0     | 0         | 0          | 0     | 0,00        | 0,00         | 0,00      | 0,00       |
| S153645 | 22,25 | 63,5      | 11,25      | 1,75  | 86,84       | 13,16        | 84,95     | 15,05      |
| S153646 | 12,5  | 68,5      | 8          | 0,75  | 90,25       | 9,75         | 89,54     | 10,46      |
| S153647 | 0     | 0         | 0          | 0     | 0,00        | 0,00         | 0,00      | 0,00       |
| S153648 | 0     | 0         | 0          | 0     | 0,00        | 0,00         | 0,00      | 0,00       |

Zone1

Zone2

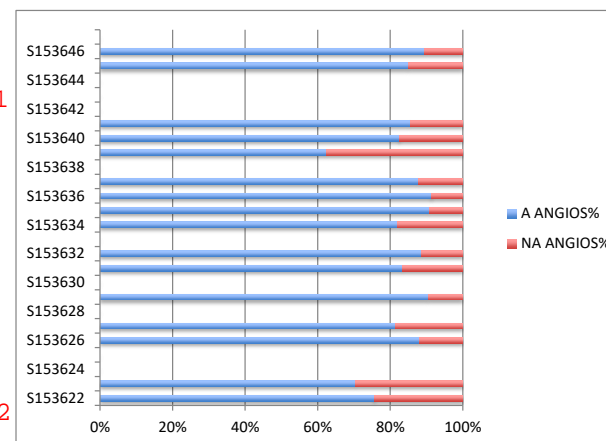

Supplement: Supplementary file 6 [file Bouchal et al S_7NEW AP_NAP ratios.pdf › Bouchal et al S_7NEW AP_NAP ratios.pdf]
