# Supplementary material for: Middle Miocene climate of southwestern Anatolia from multiple botanical proxies
Source: Copernicus journal article supplement (doi:10.5194/cp-2018-76), 2018-07-09

**S8: Modern climate stations comparable to the middle Miocene climate of the Yatağan Basin**

|                           |                     | X3wet/X3dry |                    | MAP min               |                                                 |
|---------------------------|---------------------|-------------|--------------------|-----------------------|-------------------------------------------------|
| Yatagan Basin Miocene min |                     | 2,8         |                    | 1000 mm               |                                                 |
| Yatagan Basin Miocene max |                     | 3,8         |                    | 2000 mm               |                                                 |
| Spain                     | Pamplona            | 2           | Cfb                |                       |                                                 |
| Crimea                    | Yalta               | 1,8         | Cfa                |                       |                                                 |
| N Turkey                  | Bahçeköy            | 3,8         | borderline Cfa/Csa | 888 mm MAP, too dry   |                                                 |
|                           | Kilyos              | 3,35        | borderline Cfa/Csa | 824 mm MAP, too dry   |                                                 |
|                           | Zonguldak           | 2,2         | Cfb                |                       |                                                 |
|                           | Kastamonu           | 2,5         | Cfa                | 1015 mm MAP           |                                                 |
|                           | Bozkurt             | 2,7         | Cfa                | 503 mm MAP, too dry   |                                                 |
|                           | Rize                | 2,4         | Cfa                | 1860 mm MAP           |                                                 |
|                           | Hopa                | 2,4         | Cfa                | 2087 mm MAP           |                                                 |
| Georgia                   | Poti                | 2,4         | Cfa                | 1907 mm MAP           |                                                 |
|                           | Kobuleti            | 2,4         | Cfa                | 2276 mm MAP           |                                                 |
| N Iran                    | Rasht               | 4,4         | Cfa                | 1359 mm MAP, 15,8 MAT |                                                 |
|                           | Kiashahr            | 4,2         | borderline Cfa/Csa | 1295 mm MAP, 15,6 MAT |                                                 |
| Afghanistan Parachinar    |                     | 4,2         | Cfa                | 785 mm MAP, too dry   |                                                 |
| China                     | Fouzhou (Jiangxi)   | 4,6         | Cfa                | 18,4 MAT              |                                                 |
|                           | Shaoxing (Zhejiang) | 3,5         | Cfa                | 16,9 MAT, too hot     |                                                 |
|                           | Nantong (Jiangsu)   | 4           | Cfa                | 15,2 MAT              |                                                 |
|                           | Guiyang (Guizhou)   | 8,7         | Cwa                | 16,2 MAT              | wettest month prec 215/ driest month prec 20 mm |
| Japan                     | Nagoya (Honshu)     | 3,9         | Cfa                | 1644 mm MAP, 15,7 MAT |                                                 |
|                           | Takasaki (Honshu)   | 5,4         | Cfa                |                       |                                                 |
|                           | Kameyama (Honshu)   | 3,7         | Cfa                | 1707 MAP, 14,9 MAT    |                                                 |
|                           | Yoshino (Honshu)    | 3,875       | Cfa                | 2124 MAP, 14,2 MAT    | slight winter frosts possible                   |
|                           | Kanzaki (Kyushu)    | 4,1         | Cfa                | 1819 MAP, 16,3 MAT    |                                                 |
| W Turkey                  | Izmir               | 25          | Csa                |                       |                                                 |
| SW Turkey                 | Muğla               | 21,8        | Csa                |                       |                                                 |

E USA: Cf climates too wet, too equable (low X3wet/X3dry) in the east,  
too winter cold in the interior

**S8 (1) Modern climate stations comparable to the middle Miocene climate of the Yatağan Basin, southwestern Anatolia. Climate data from CLIMATE-DATA.ORG (<https://sv.climate-data.org/info/sources/>) and Ustaoglu (2012). Selected Walter-Lieth climate diagrams**

**Crimea: Yalta**

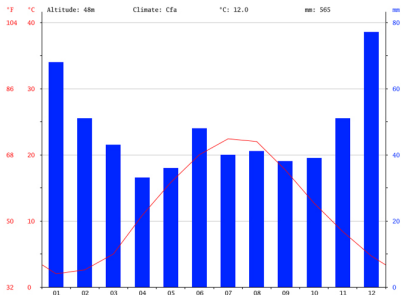

**SW Turkey: Muğla**

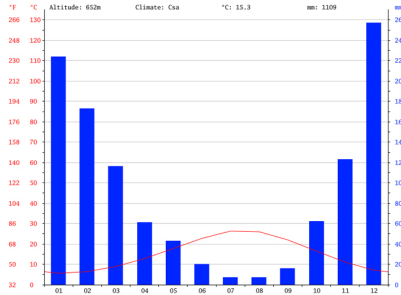

**N Turkey: Bahçeköy**

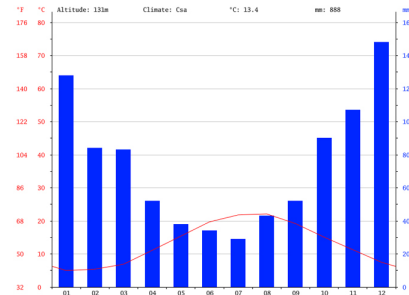

**N Turkey: Bozkurt**

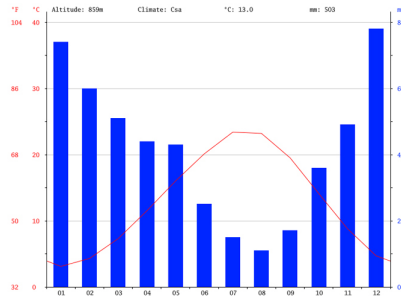

**N Turkey: Hopa**

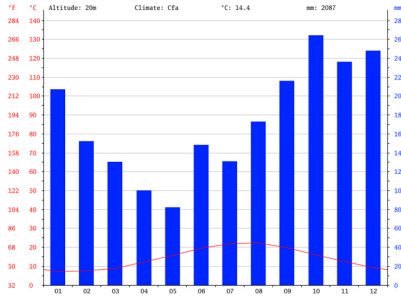

**N Turkey: Kastamou**

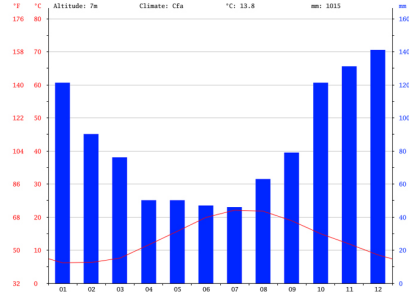

**N Turkey: Kilyos**

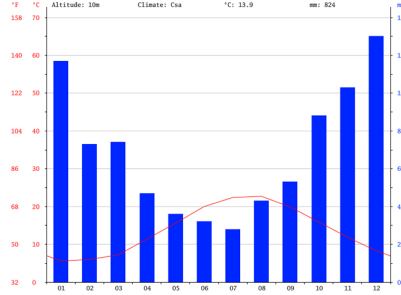

**N Turkey: Rize**

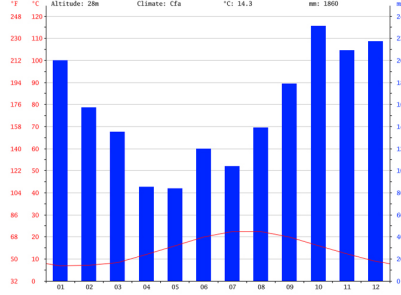

**N Turkey: Zonguldak**

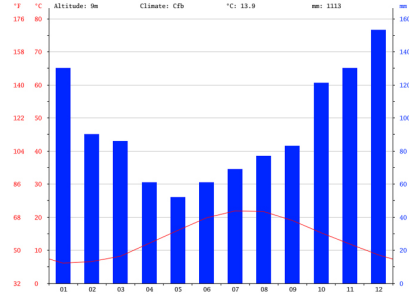

**Georgia: Kobuleti**

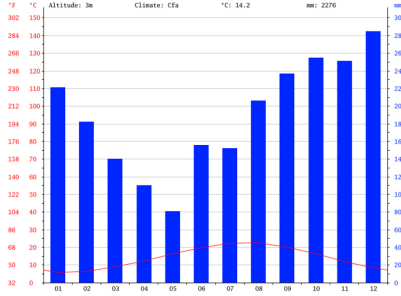

**Georgia: Poti**

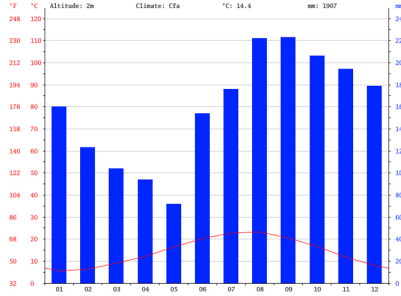

**Afghanistan: Parachinar**

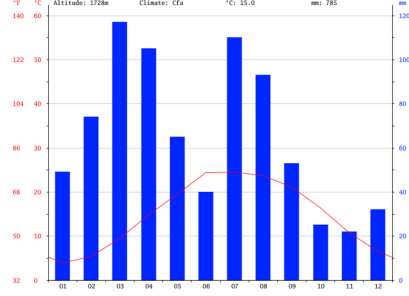

**S 8 (2) Modern climate stations comparable to the middle Miocene climate of the Yatağan Basin, southwestern Anatolia. Climate data from CLIMATE-DATA.ORG (<https://sv.climate-data.org/info/sources/>) and Ustaoğlu (2012). Selected Walter-Lieth climate diagrams**

**Spain: Pamplona**

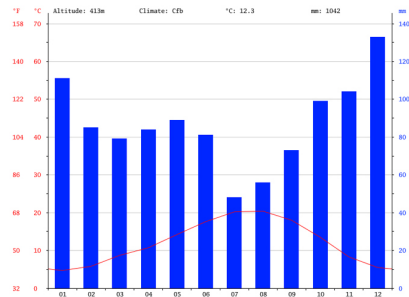

**N Iran: Kiashahr**

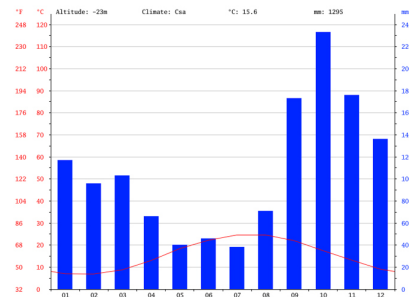

**N Iran: Rasht**

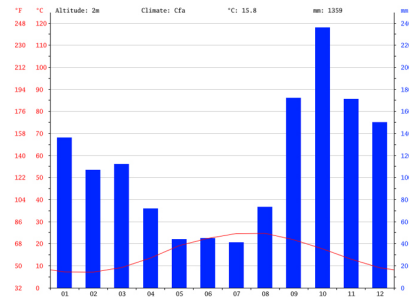

**China: Fouzhou (Jiangxi)**

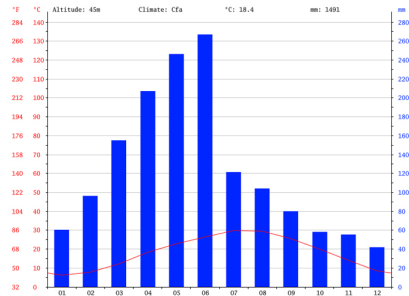

**China: Nantong (Jiangsu)**

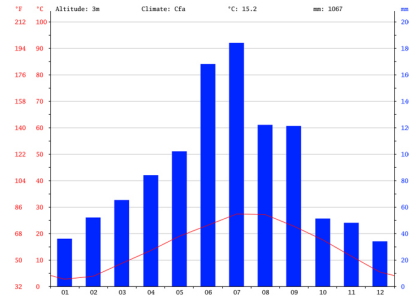

**China: Shaoxing (Zhejiang)**

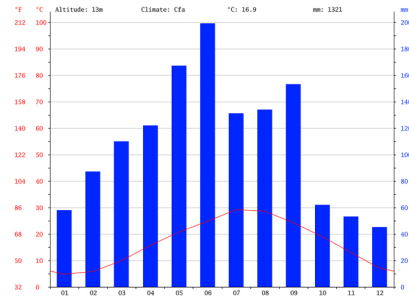

**China: Guiyang (Guizhou)**

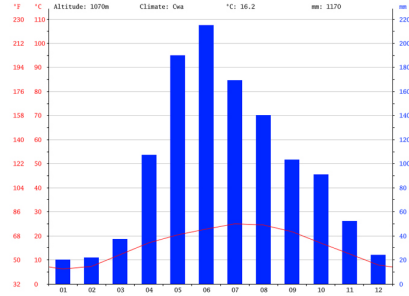

**Japan: Kameyama (Honshu)**

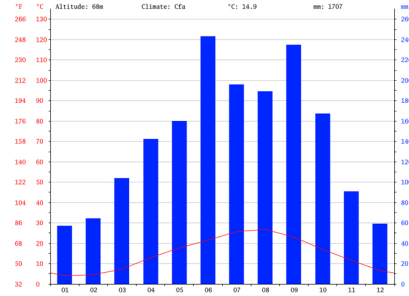

**Japan: Kanzaki (Kyushu)**

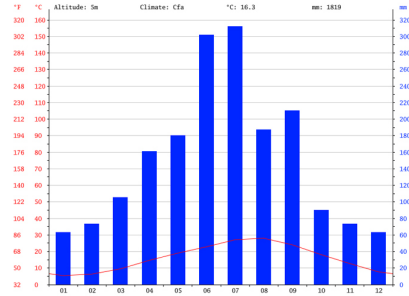

**Japan: Nagoya (Honshu)**

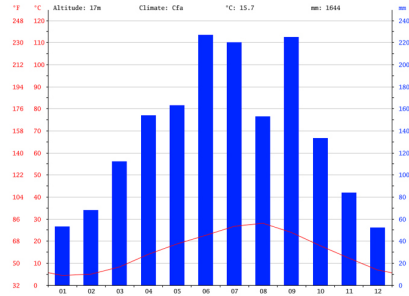

**Japan: Takasaki (Honshu)**

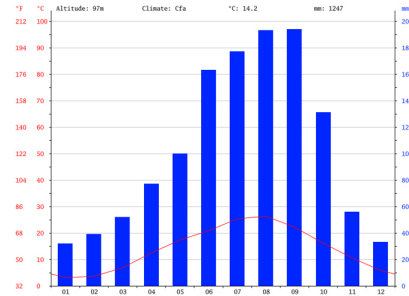

**Japan: Yoshino(Honshu)**

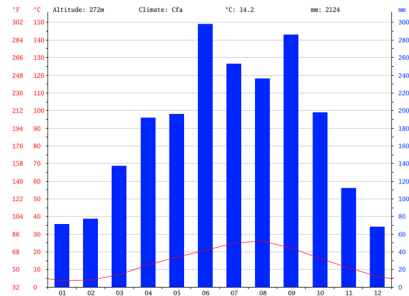

Supplement: Supplementary file 7 [file Bouchal et al S_8 NEW.pdf › Bouchal et al S_8 NEW.pdf]
