# Supplementary material for: Middle Miocene climate of southwestern Anatolia from multiple botanical proxies
Source: Copernicus journal article supplement (doi:10.5194/cp-2018-76), 2018-07-09

**Supplementary Material S4:** Climate parameters reconstructed by CLAMP (<http://clamp.ibcas.ac.cn/>; Yang et al., 2011) for three localities in the Yatağan Basin

Abbreviations:

MAT – mean annual temperature ((°C)

WMMT – warm month mean temperature (°C)

CMMT – cold month mean temperature (°C)

GROWSEAS – length of growing season (months)

GSP – growing season precipitation (cm)

MMGSP – mean month growing season precipitation (cm)

X3.WET – precipitation of the three wettest months (cm)

X3.DRY – precipitation of the three driest months (cm)

RH – relative humidity (%)

SH – specific humidity (g/kg)

ENTHALPY – (kJ/kg)\*10<sup>-1</sup>

For excel files of scoring of leaf characters for the localities Tınaz, Eskişehir, and Salihpaşalar, please contact the corresponding authors.

MAT (°C)

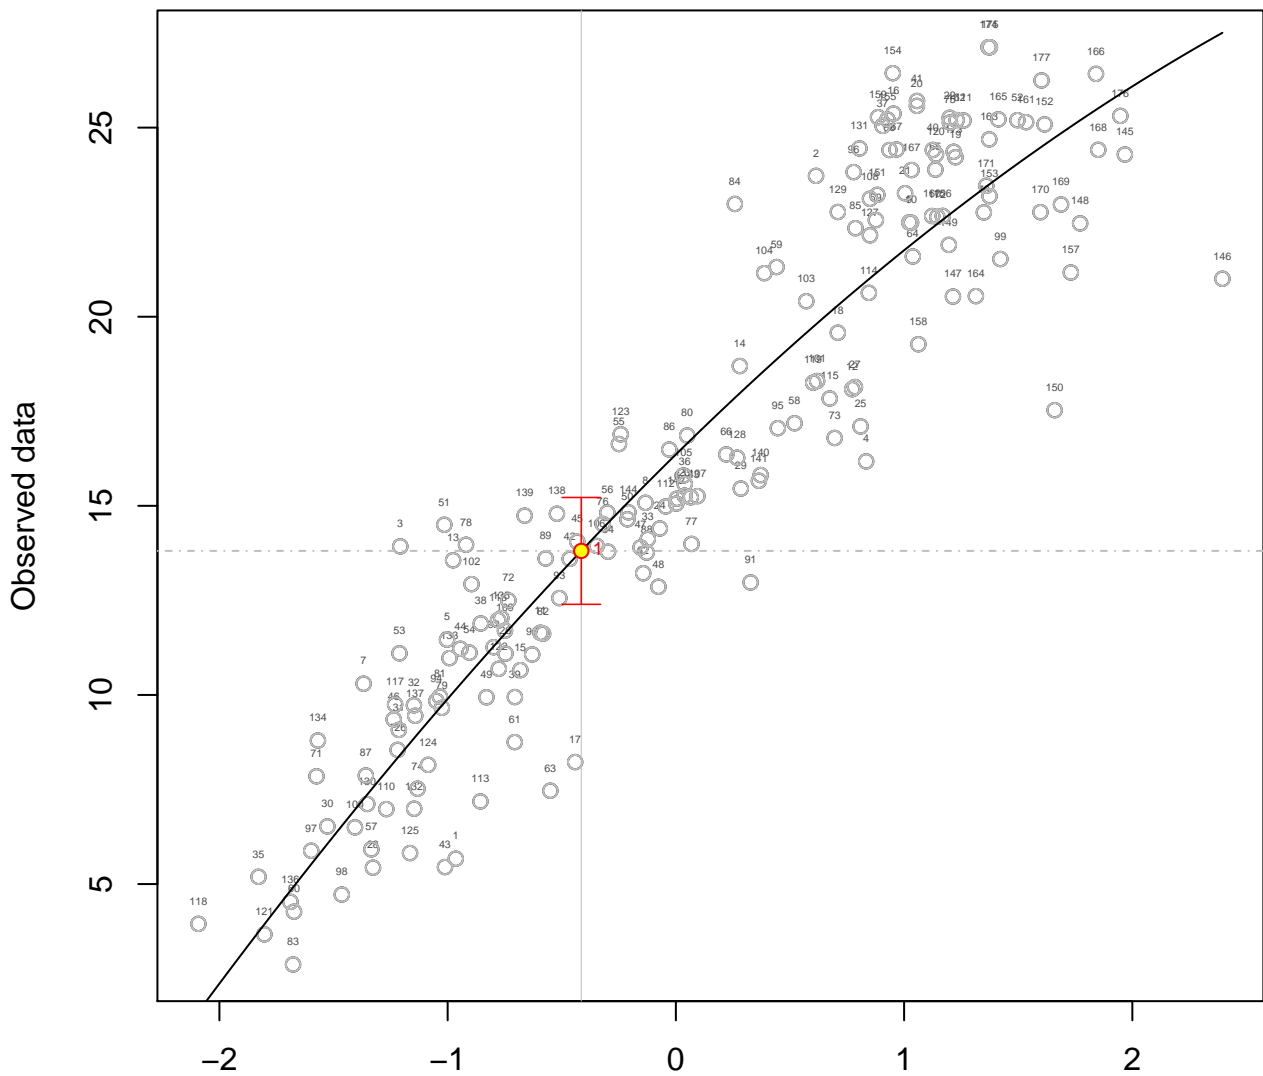

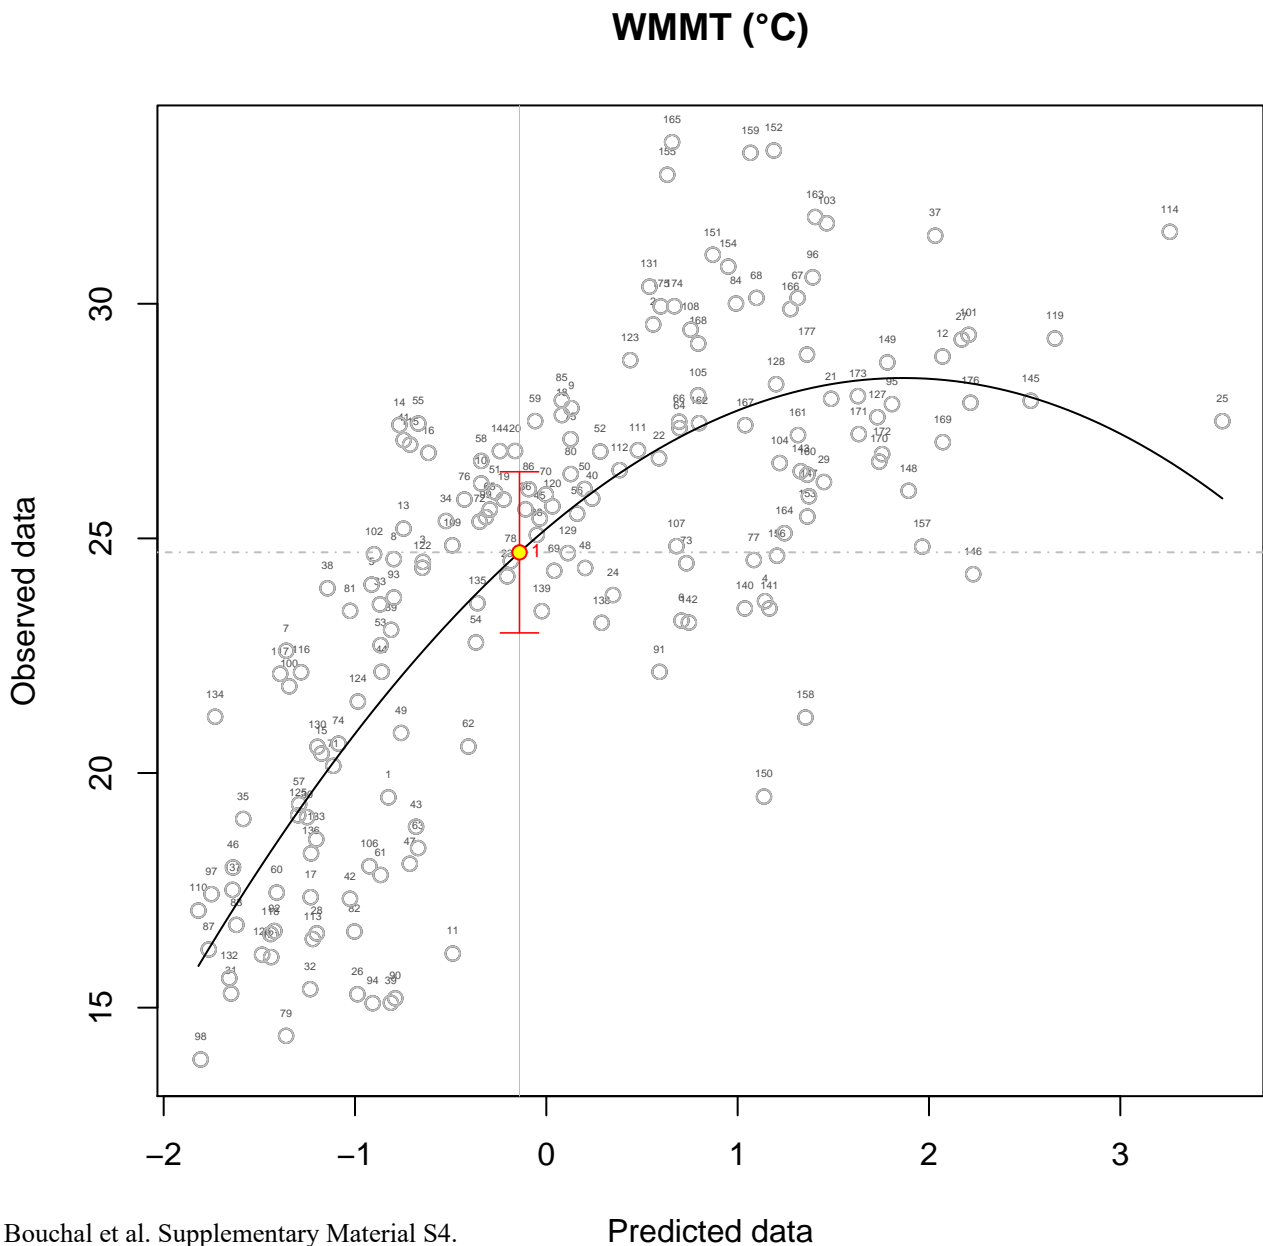

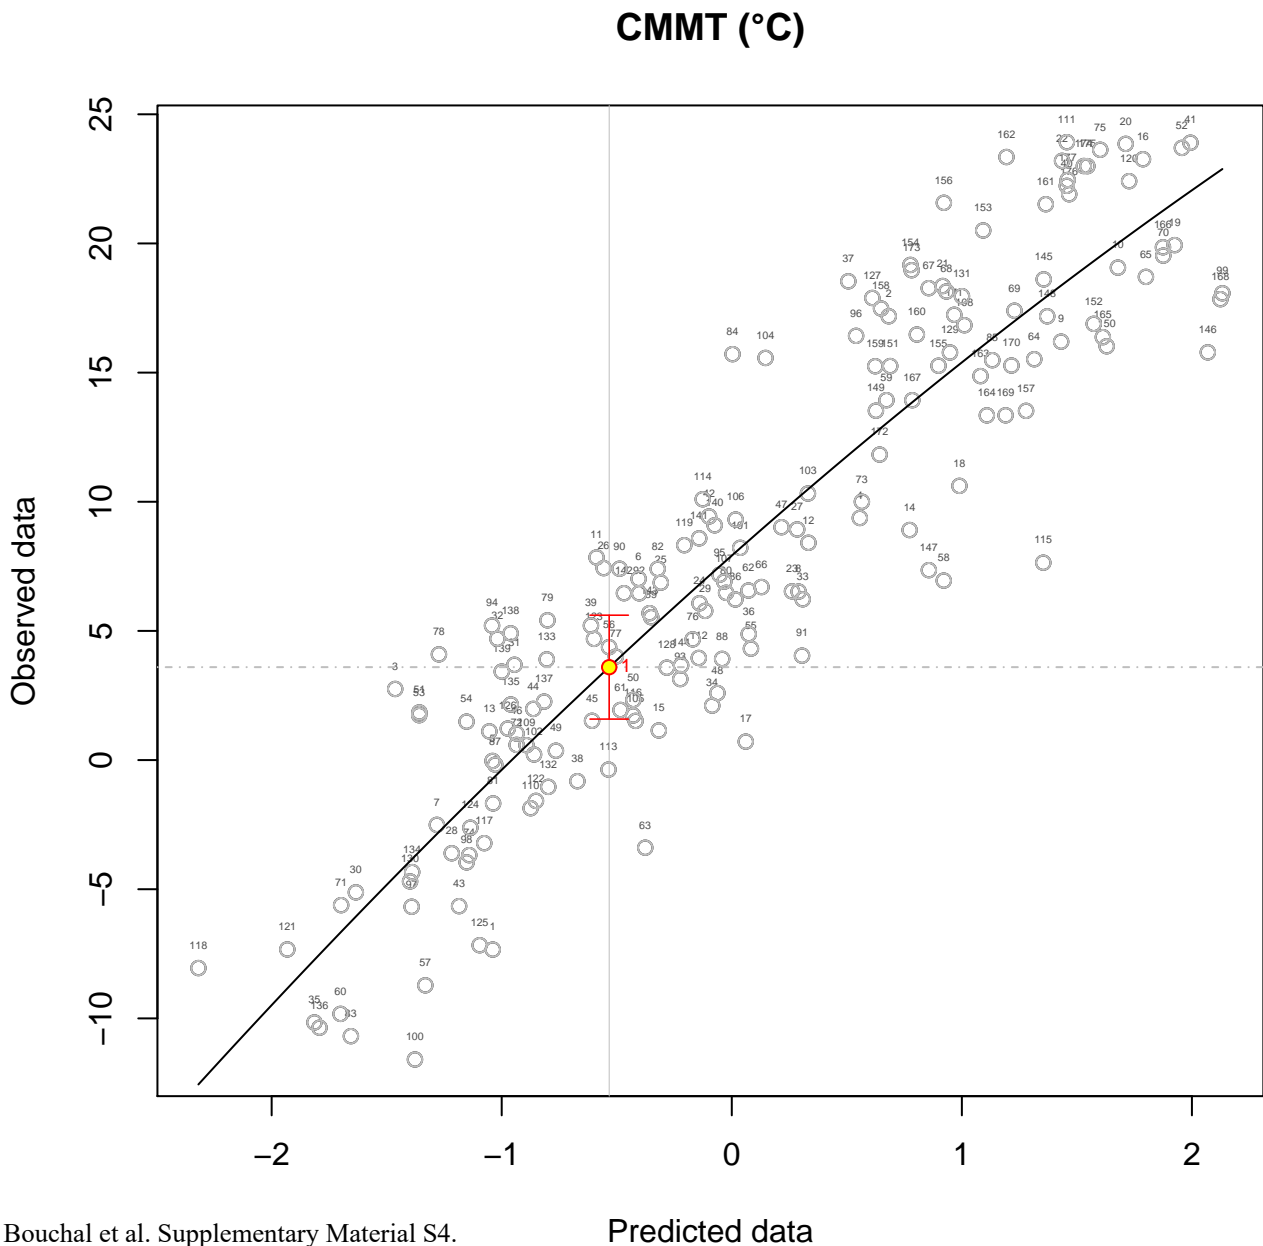

GROWSEAS (months)

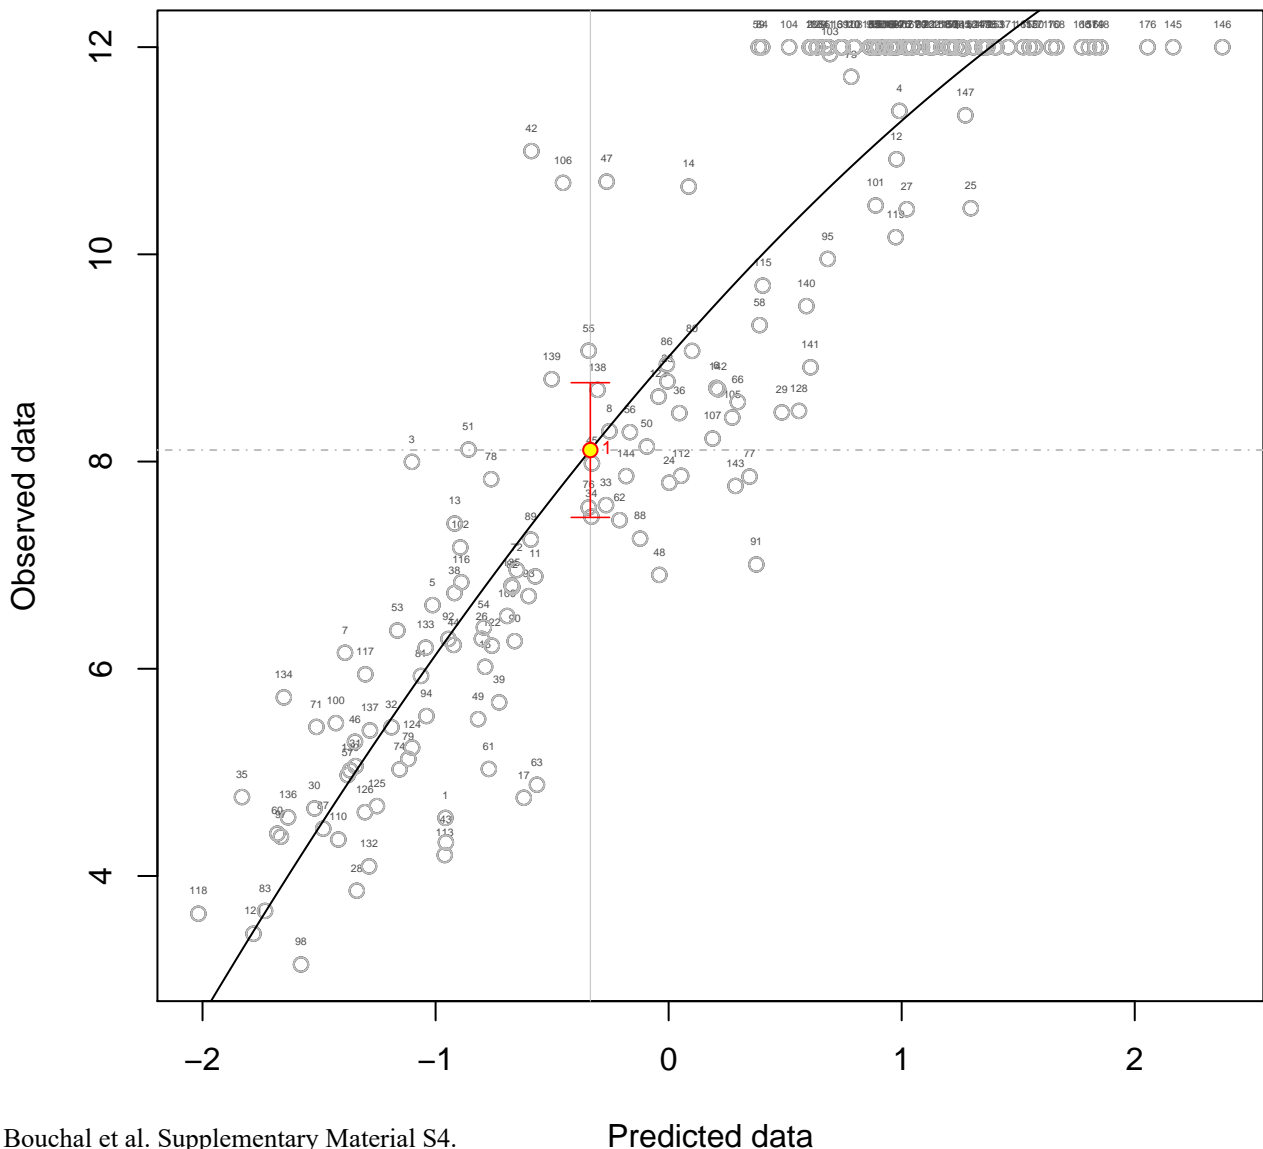



MMGSP (cm)

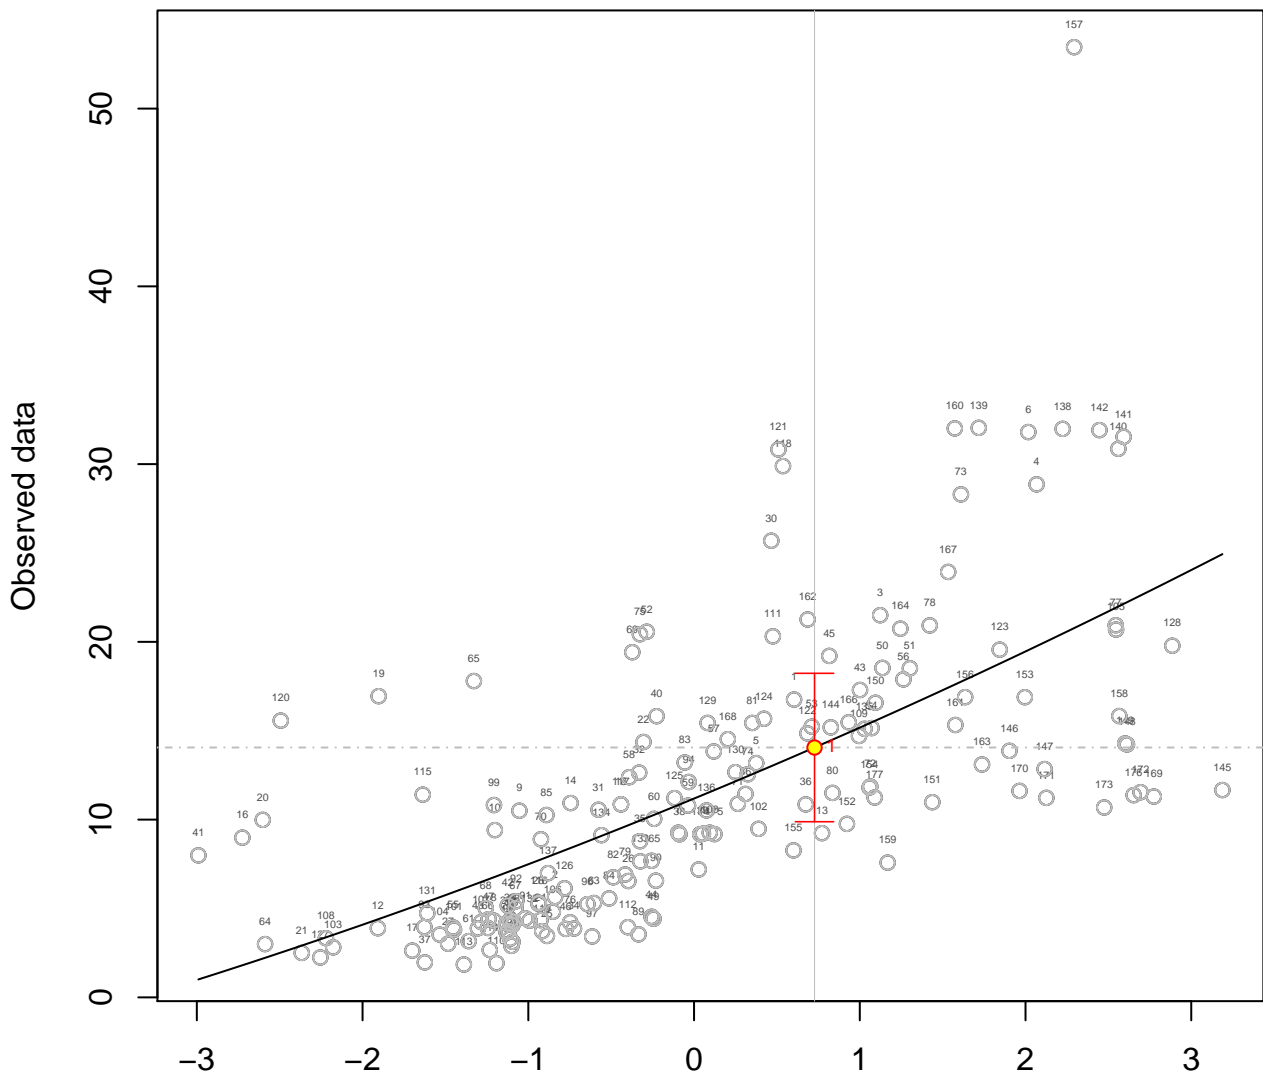

X3.WET (cm)

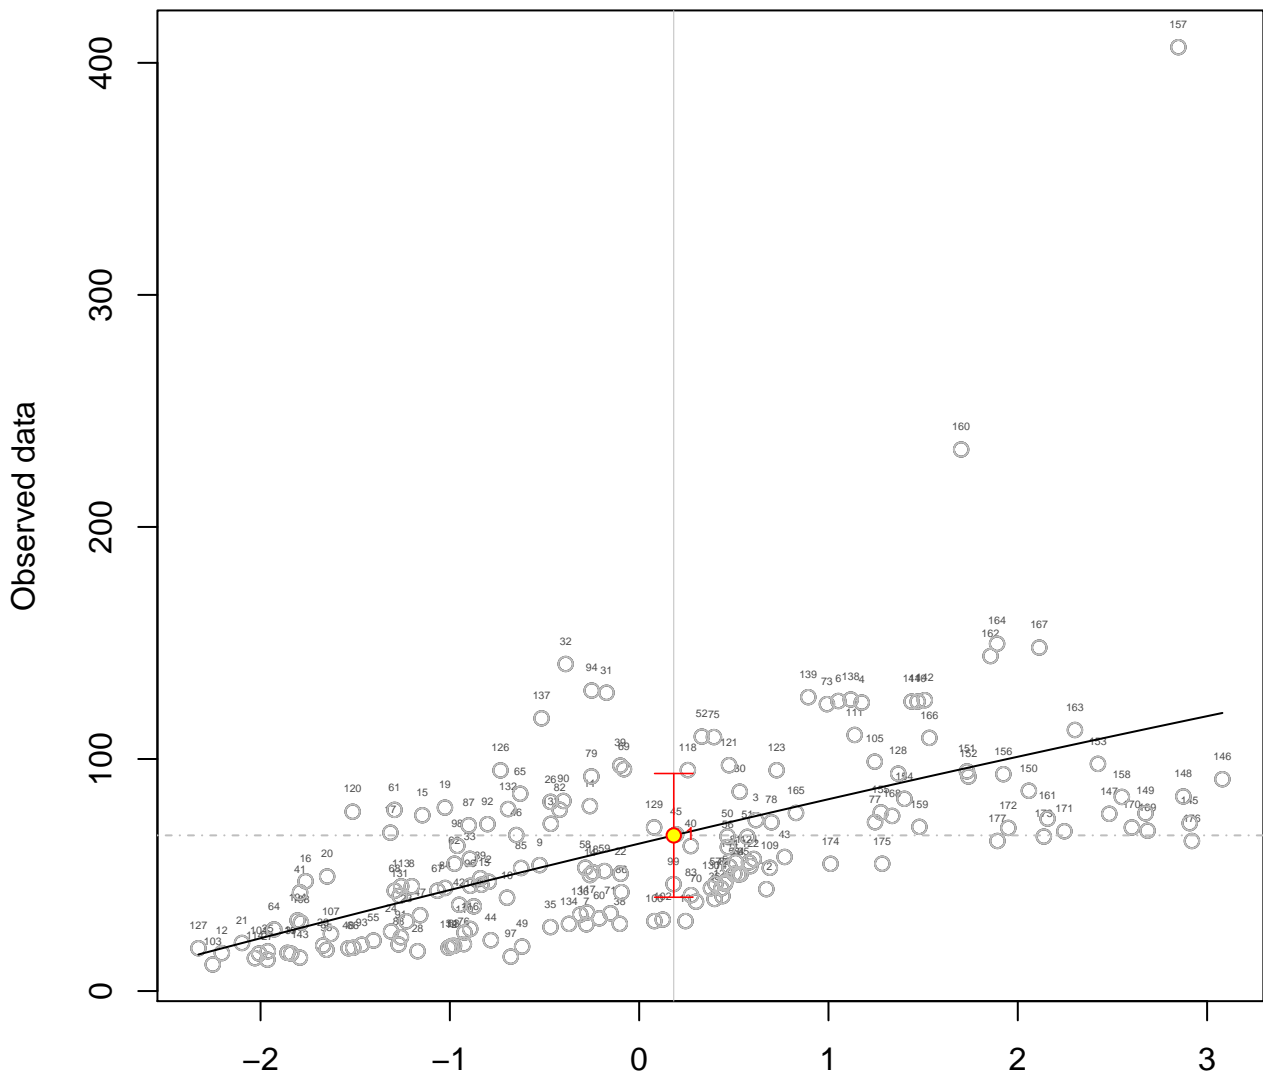



X3.DRY (cm)

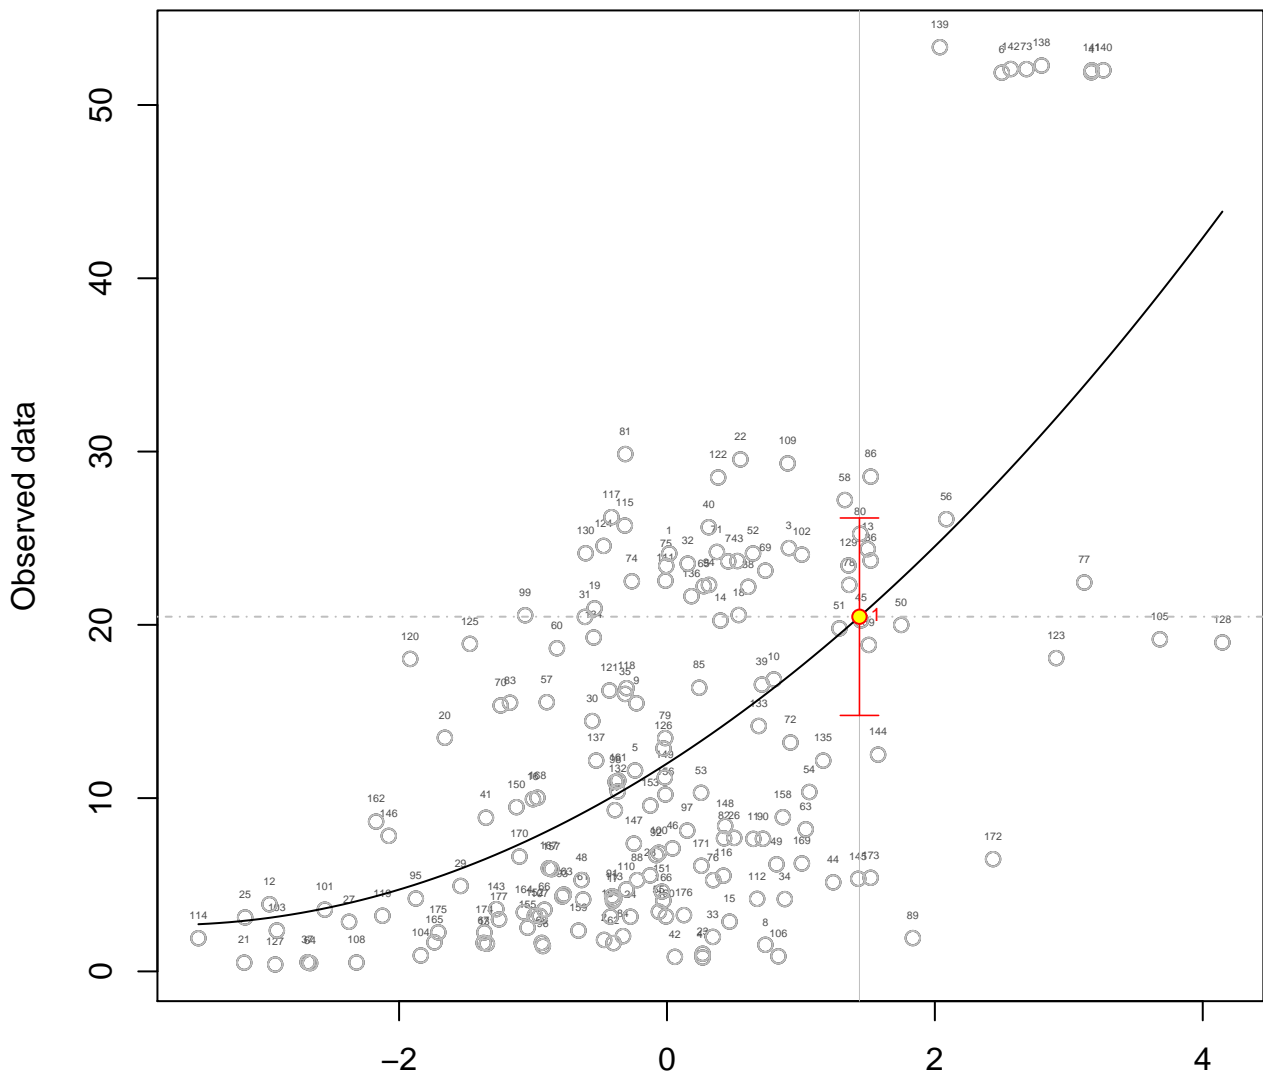

RH (%)

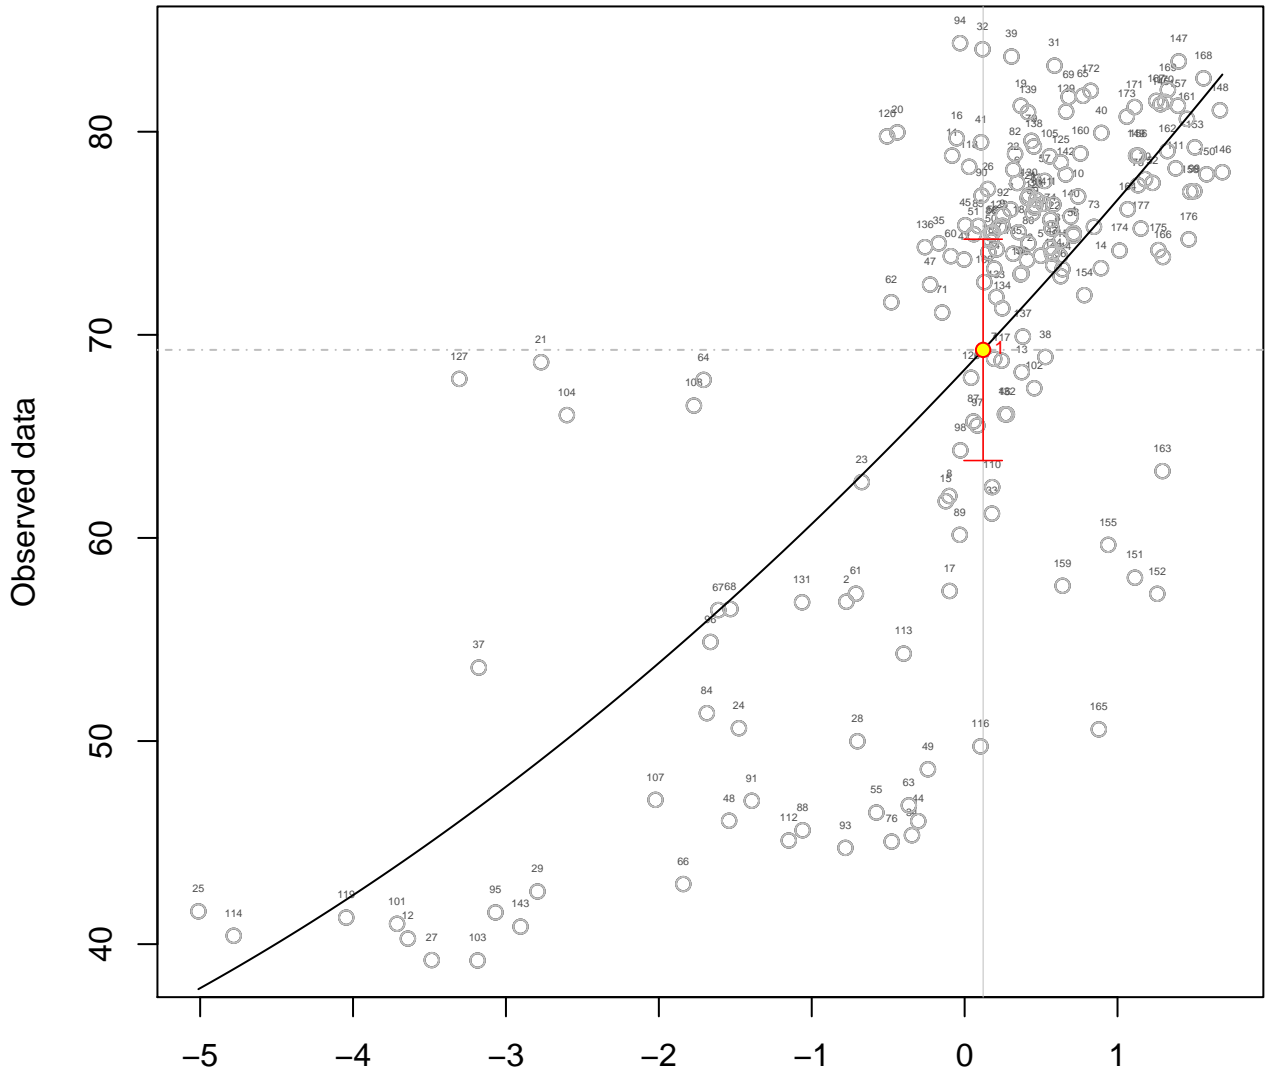

SH (g/Kg)

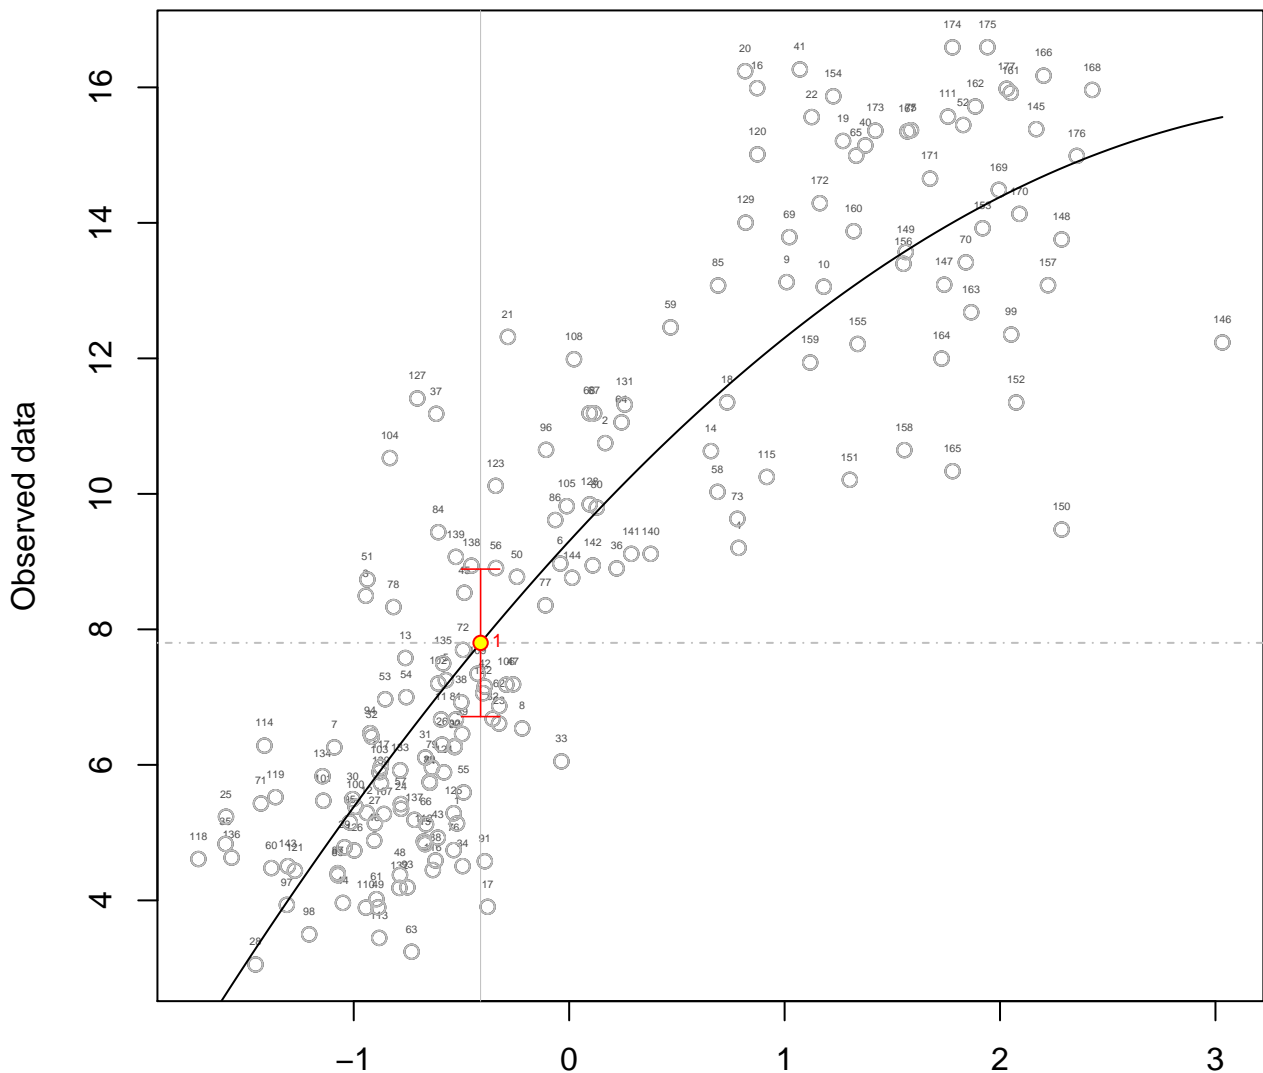

# ENTHAL (kJ/Kg)

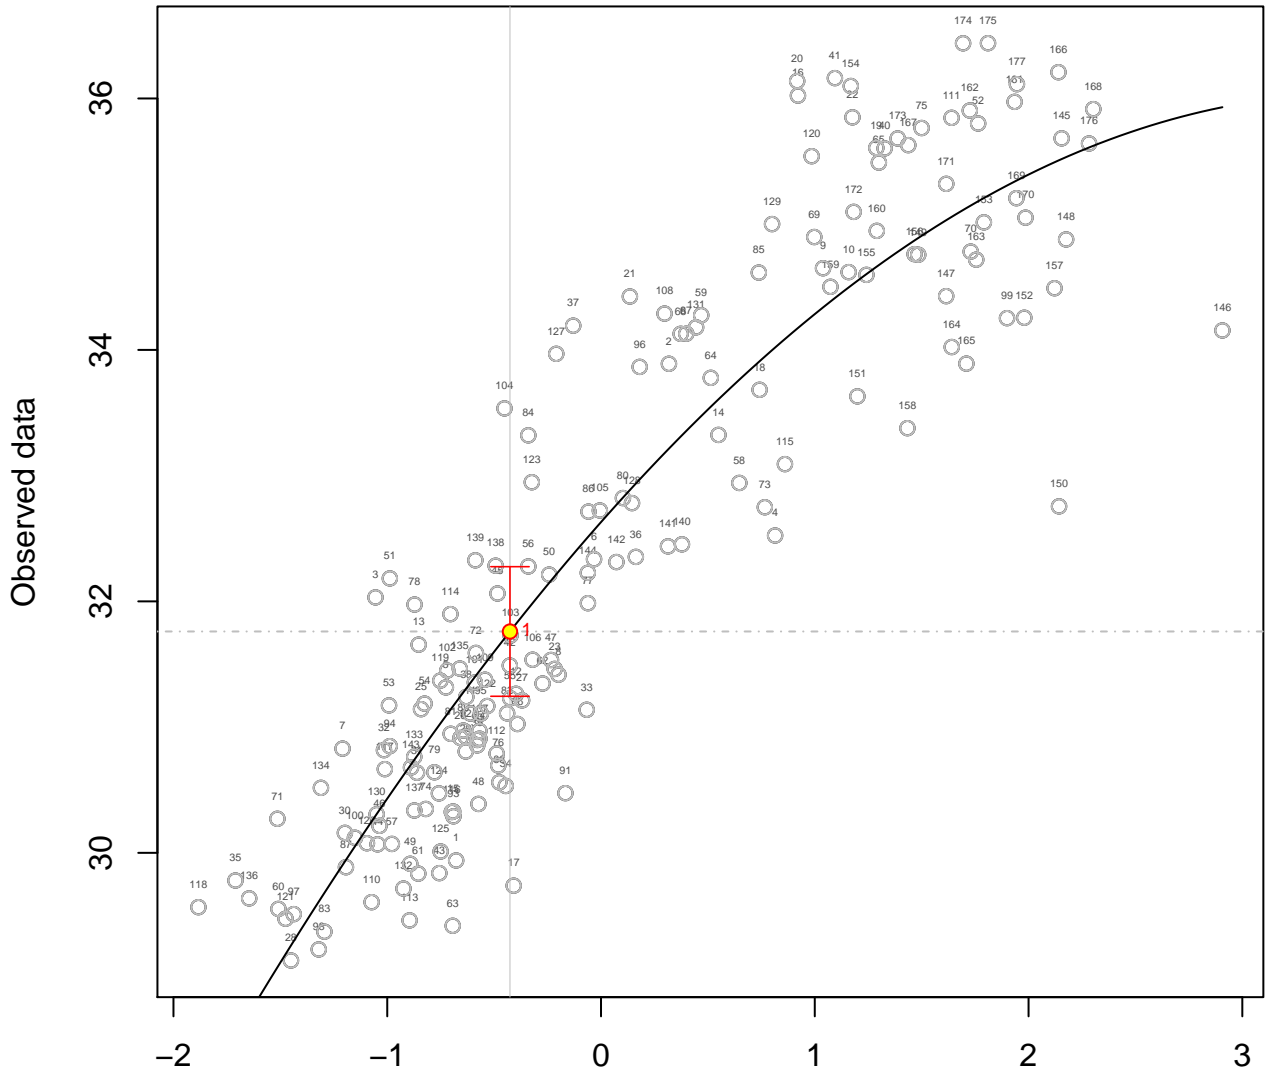

MAT (°C)

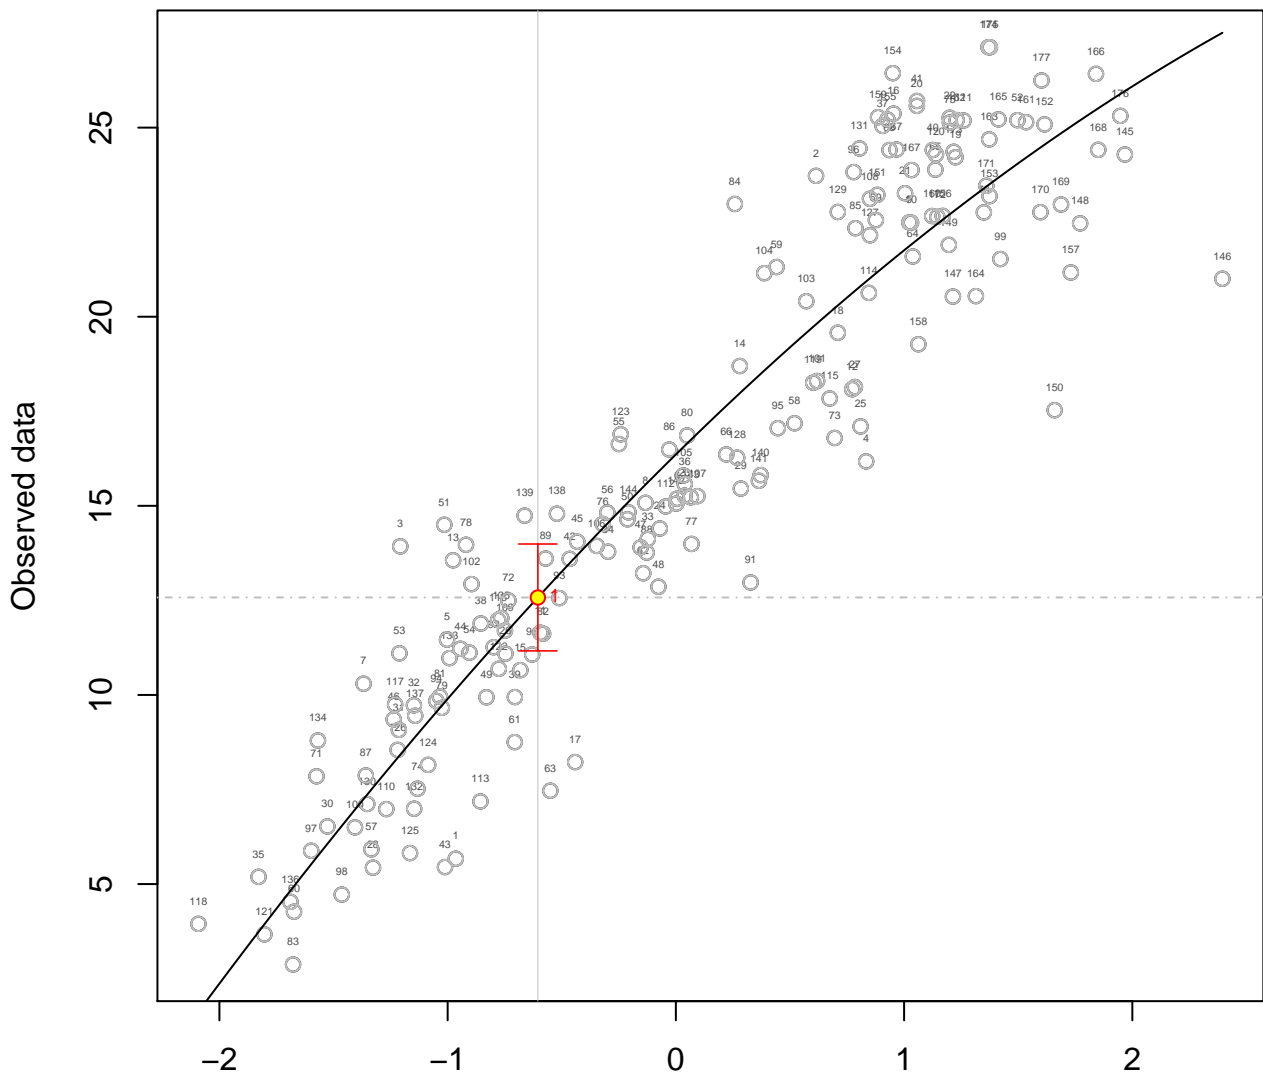

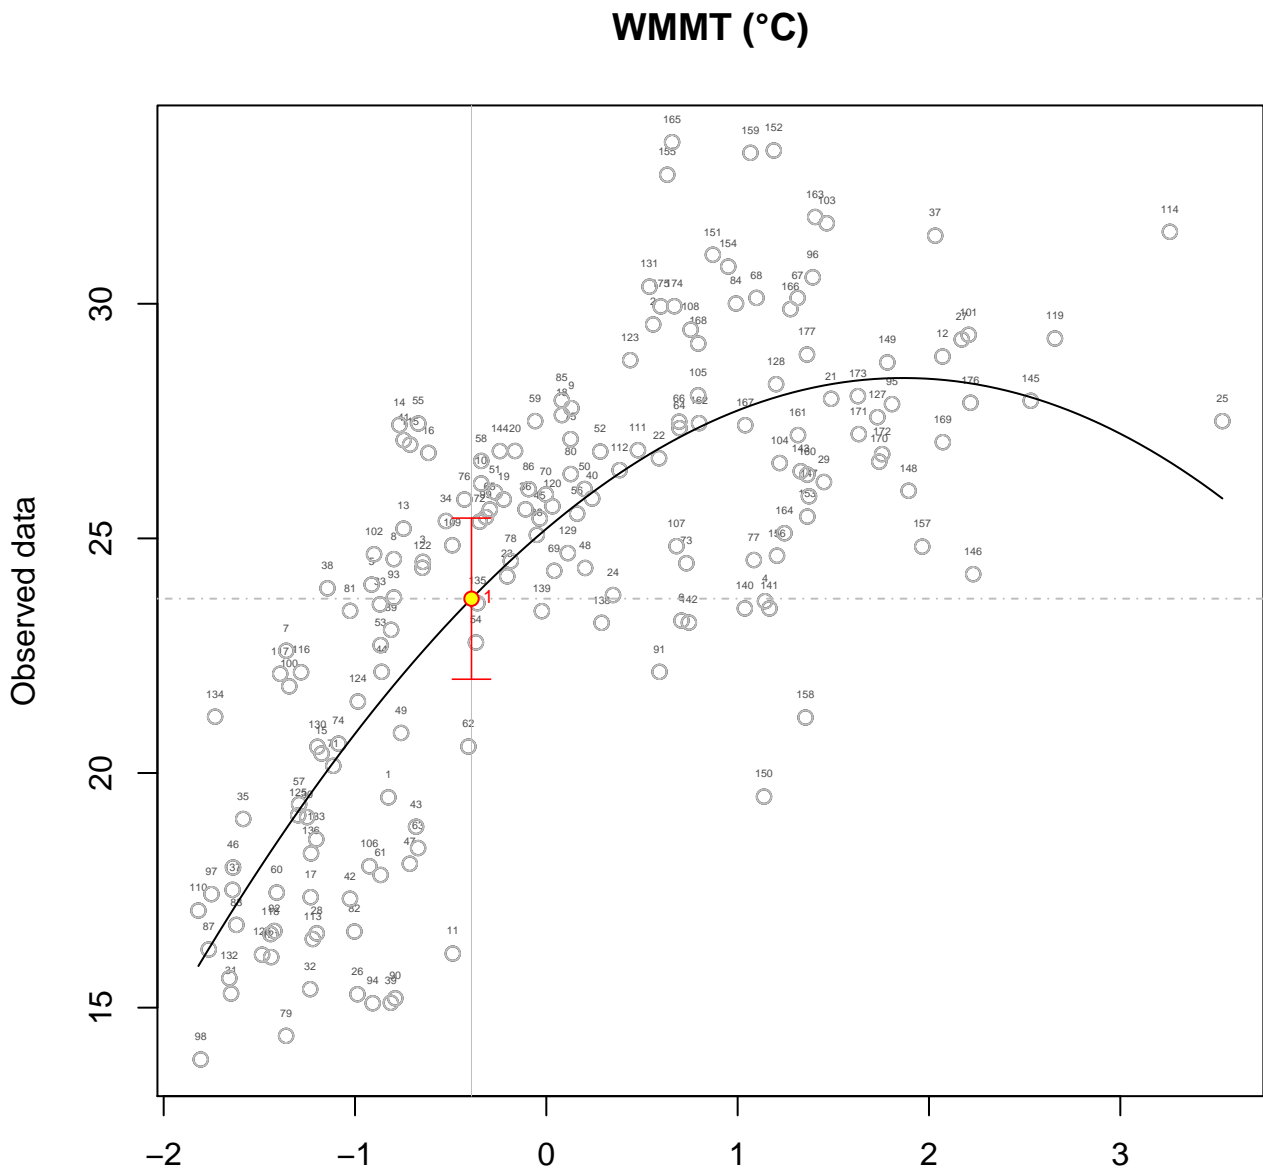

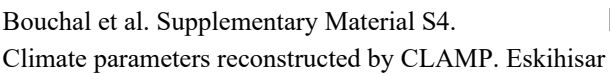

GROWSEAS (months)

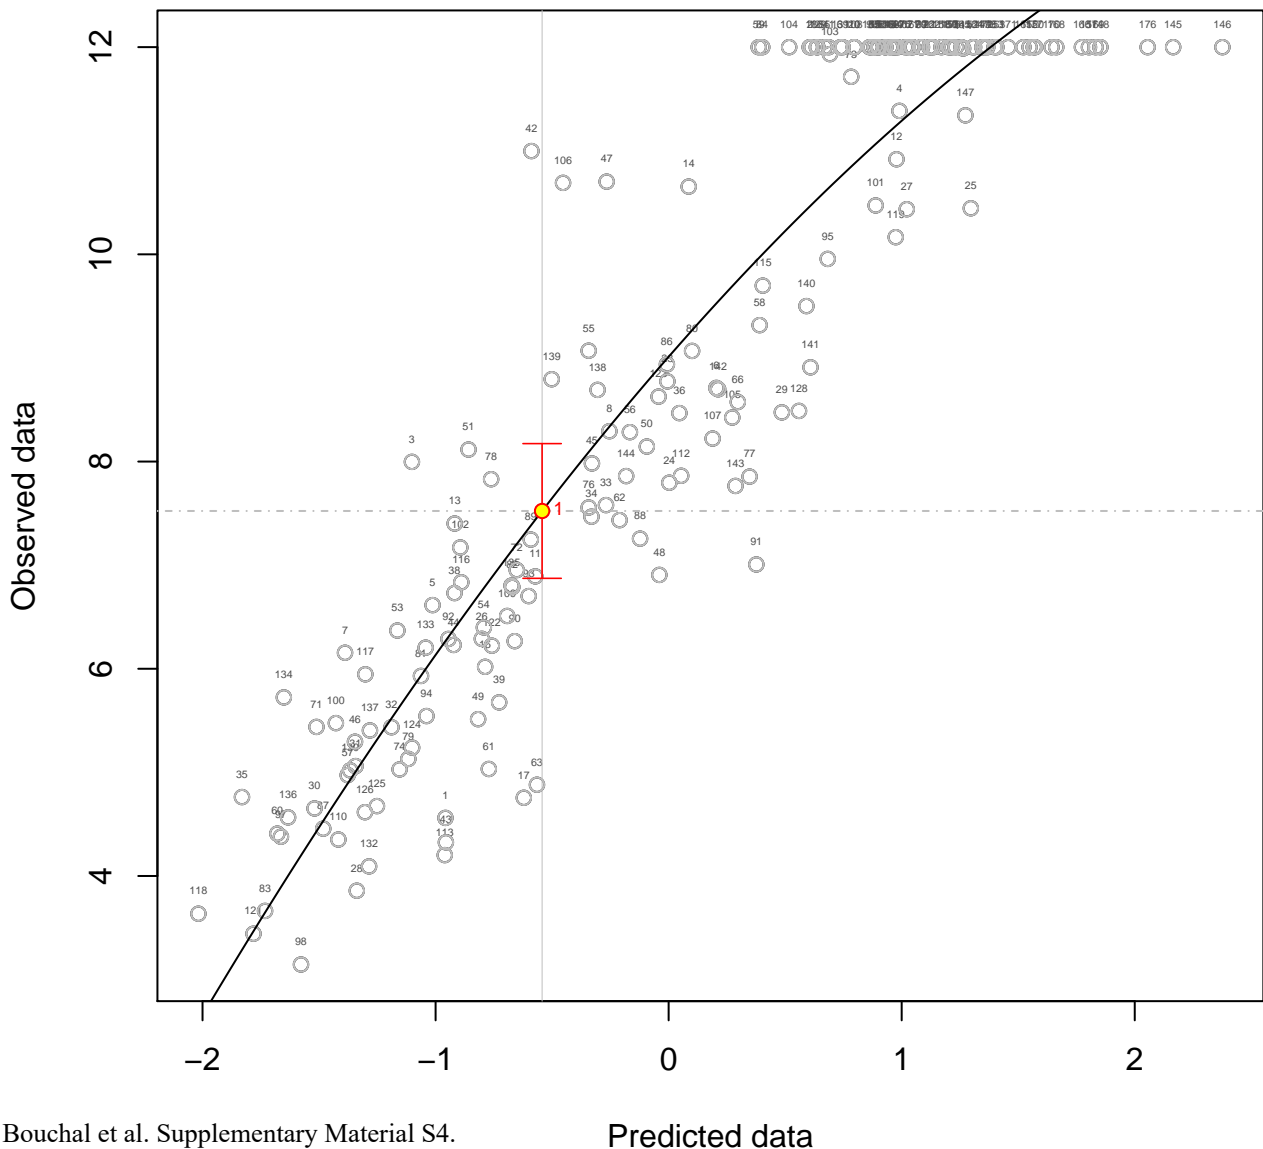



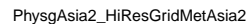

# MMGSP (cm)

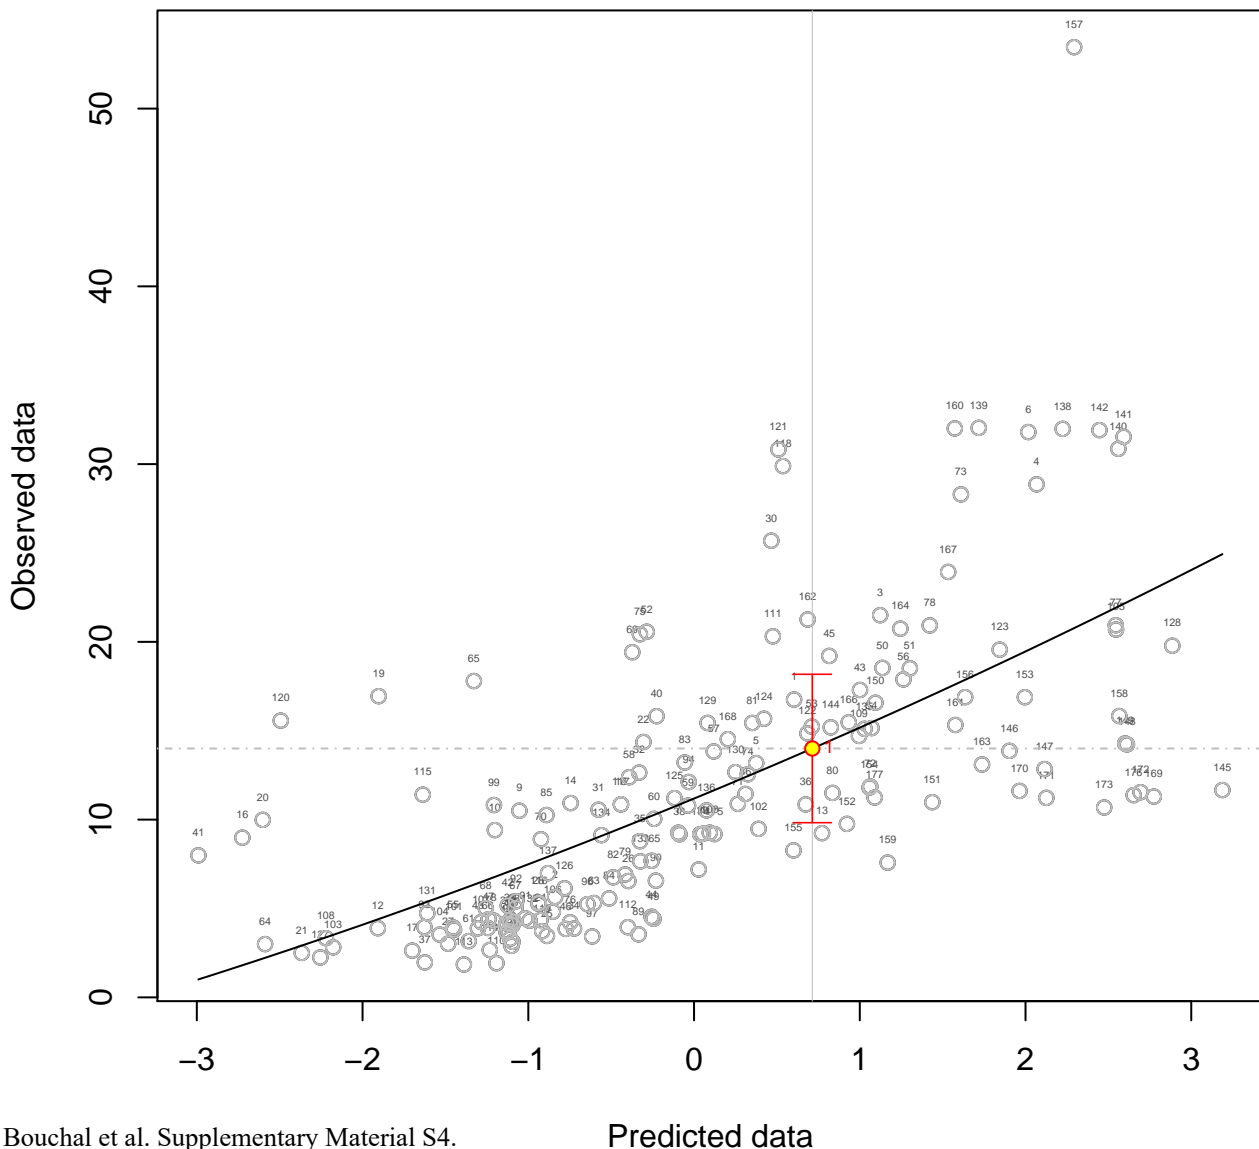

X3.WET (cm)

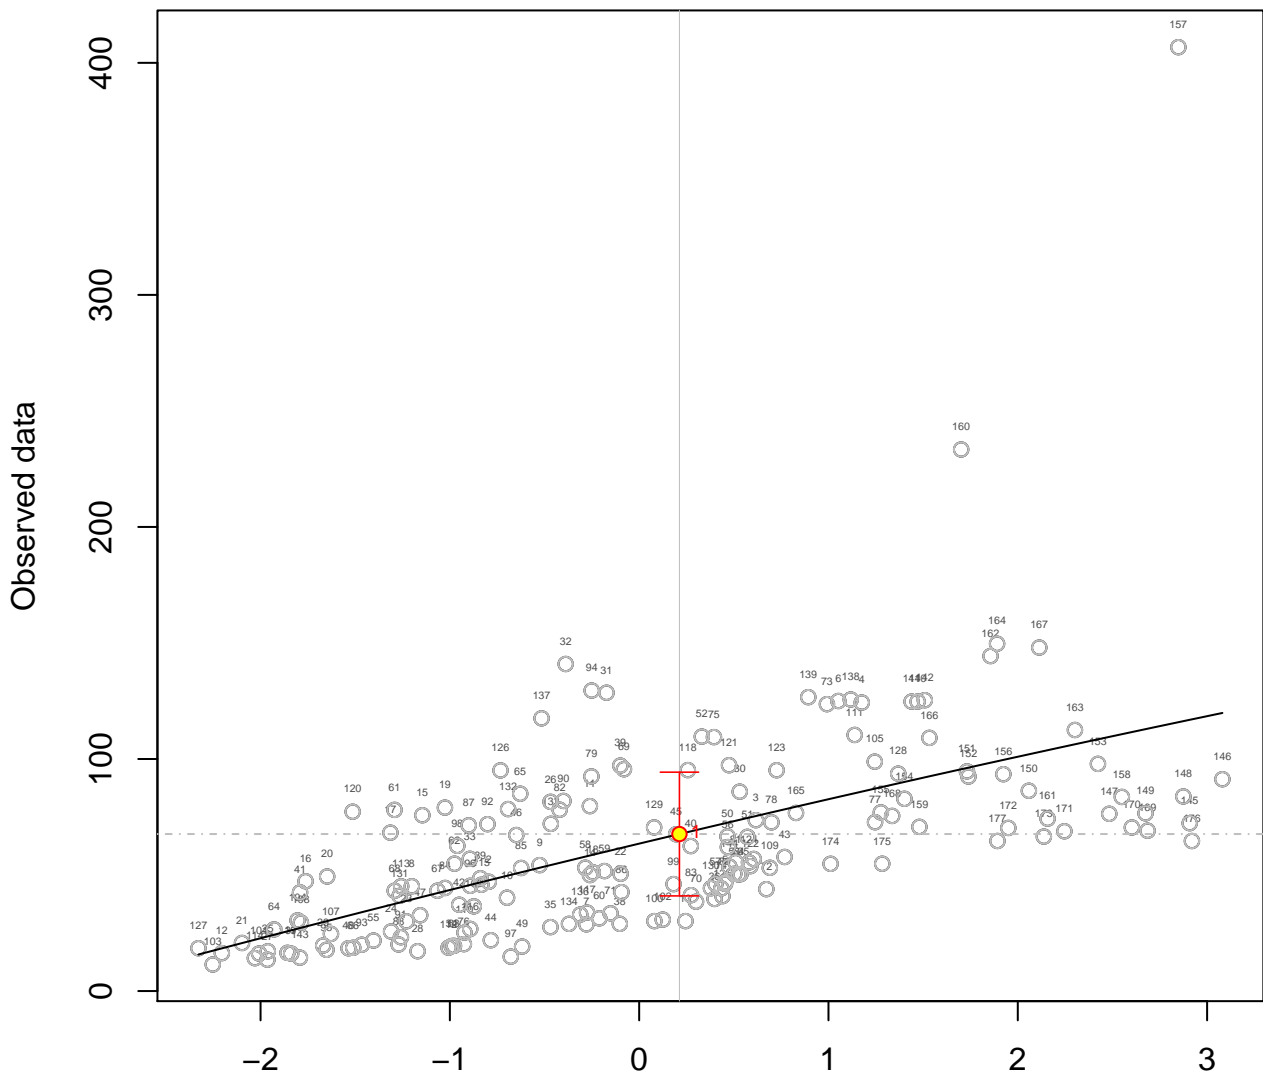

X3.DRY (cm)

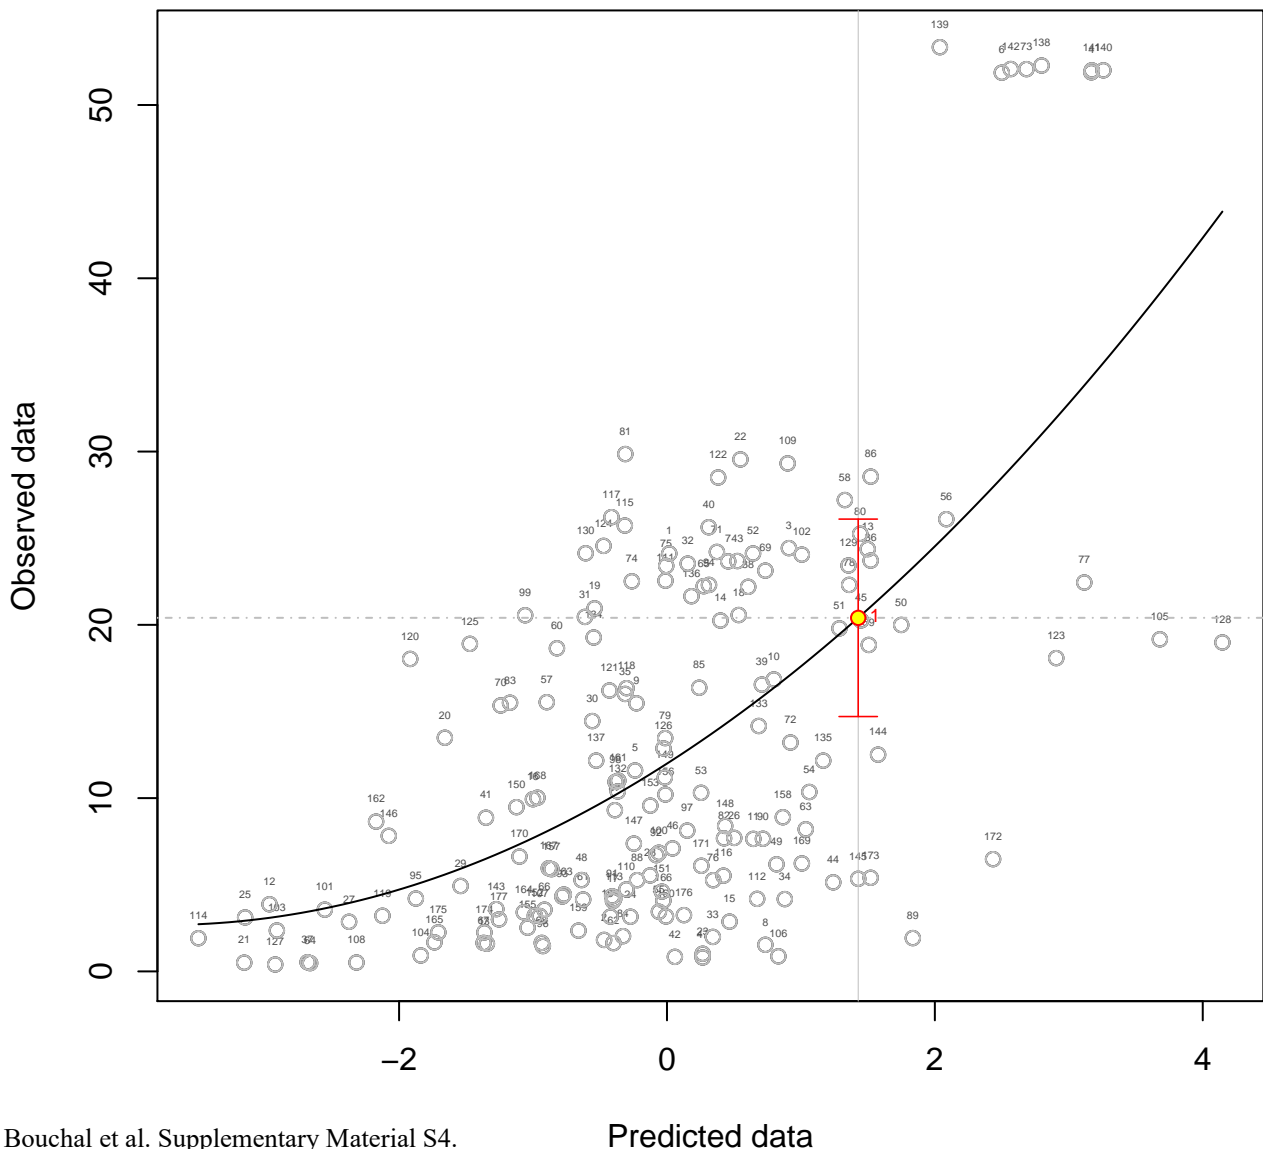

RH (%)

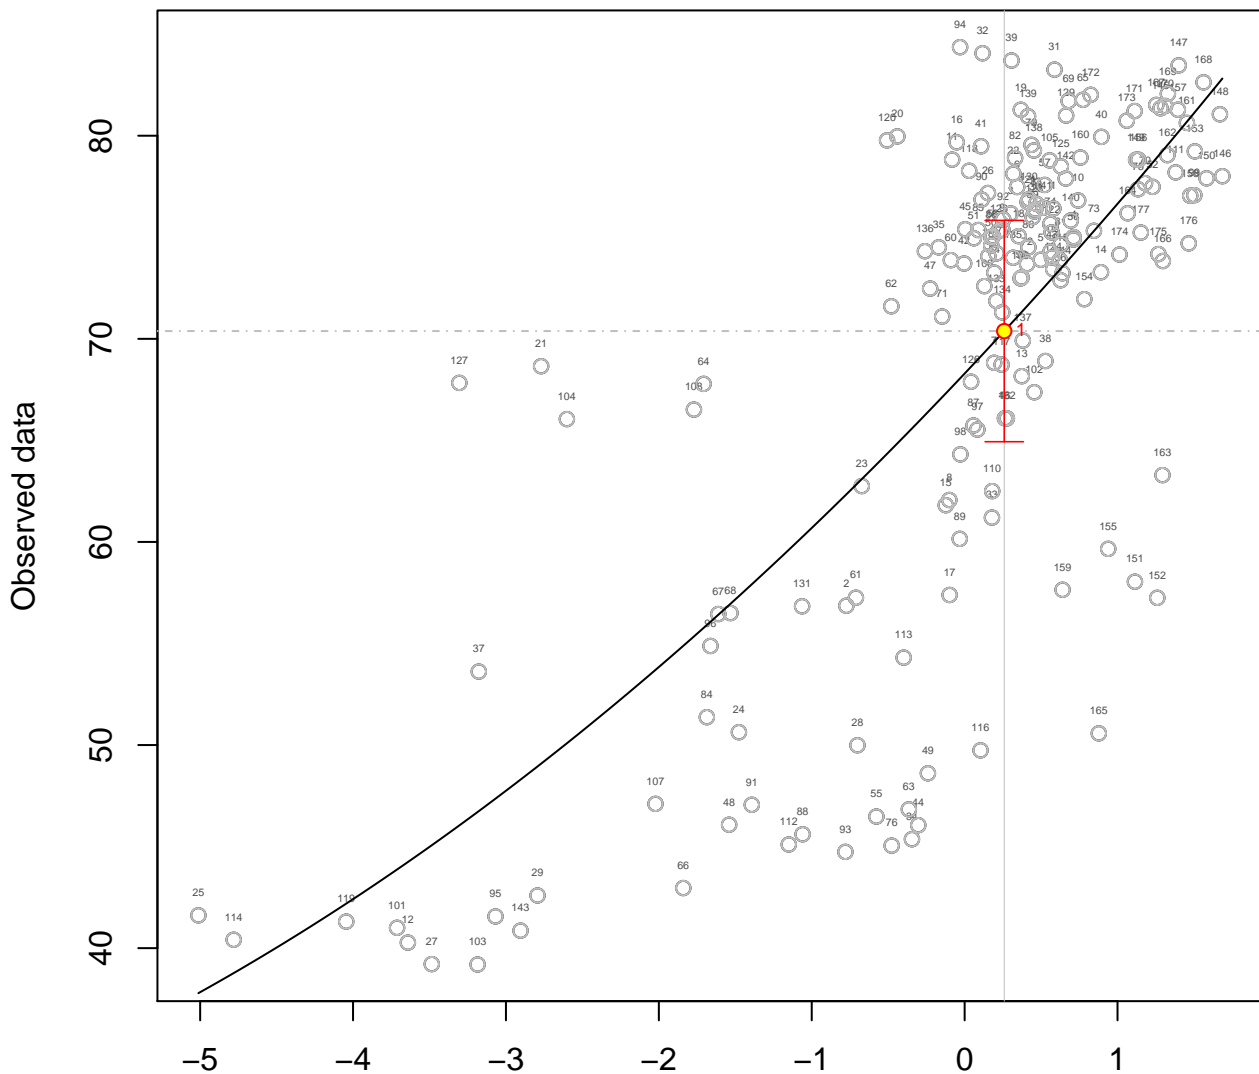

SH (g/Kg)

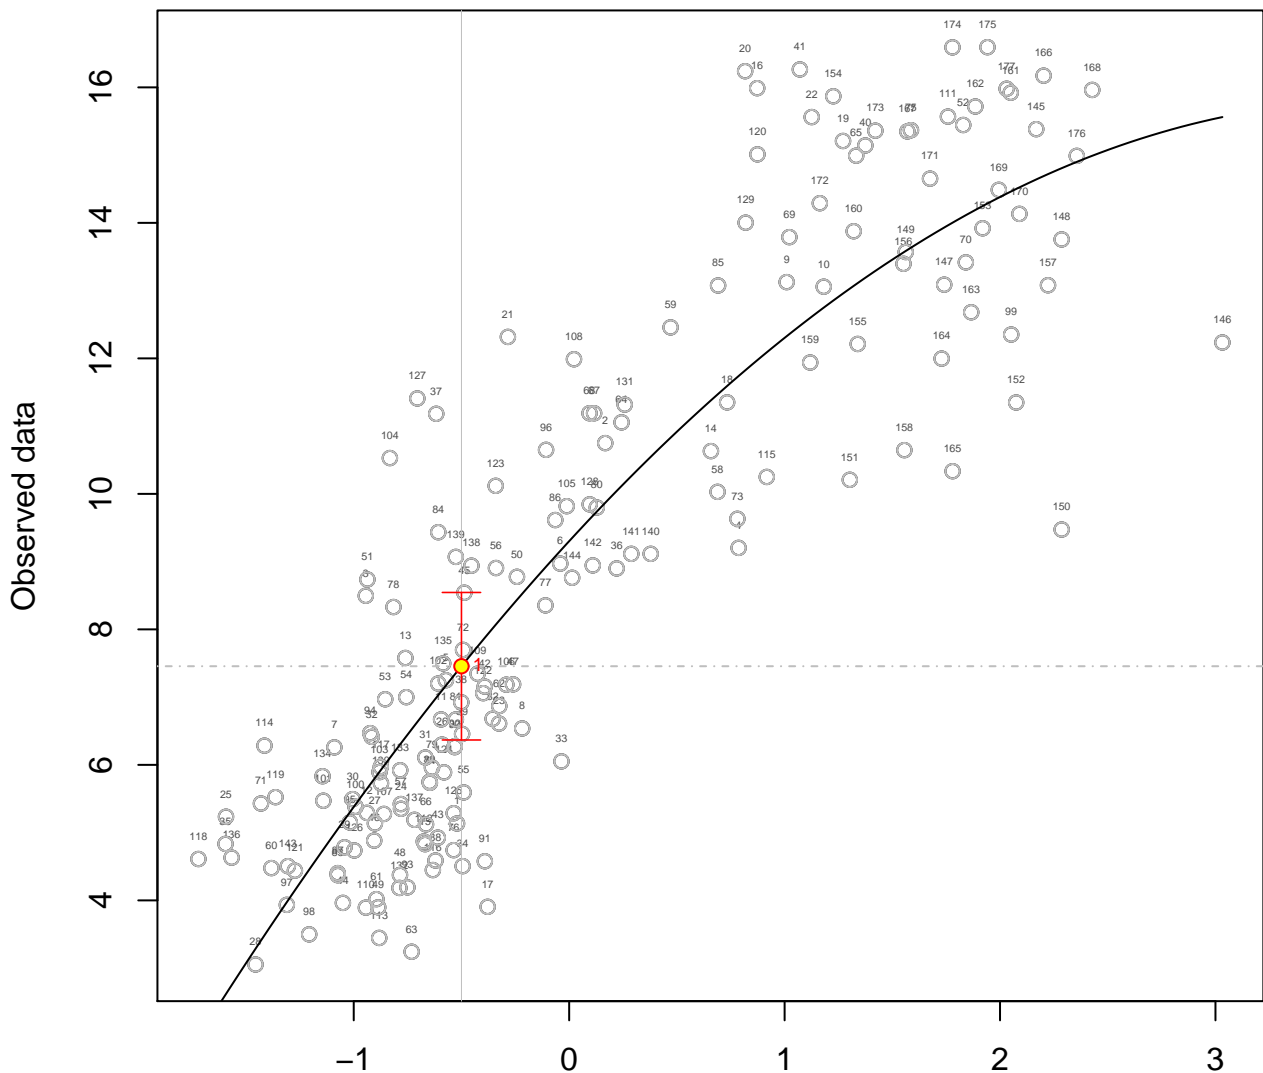

# ENTHAL (kJ/Kg)

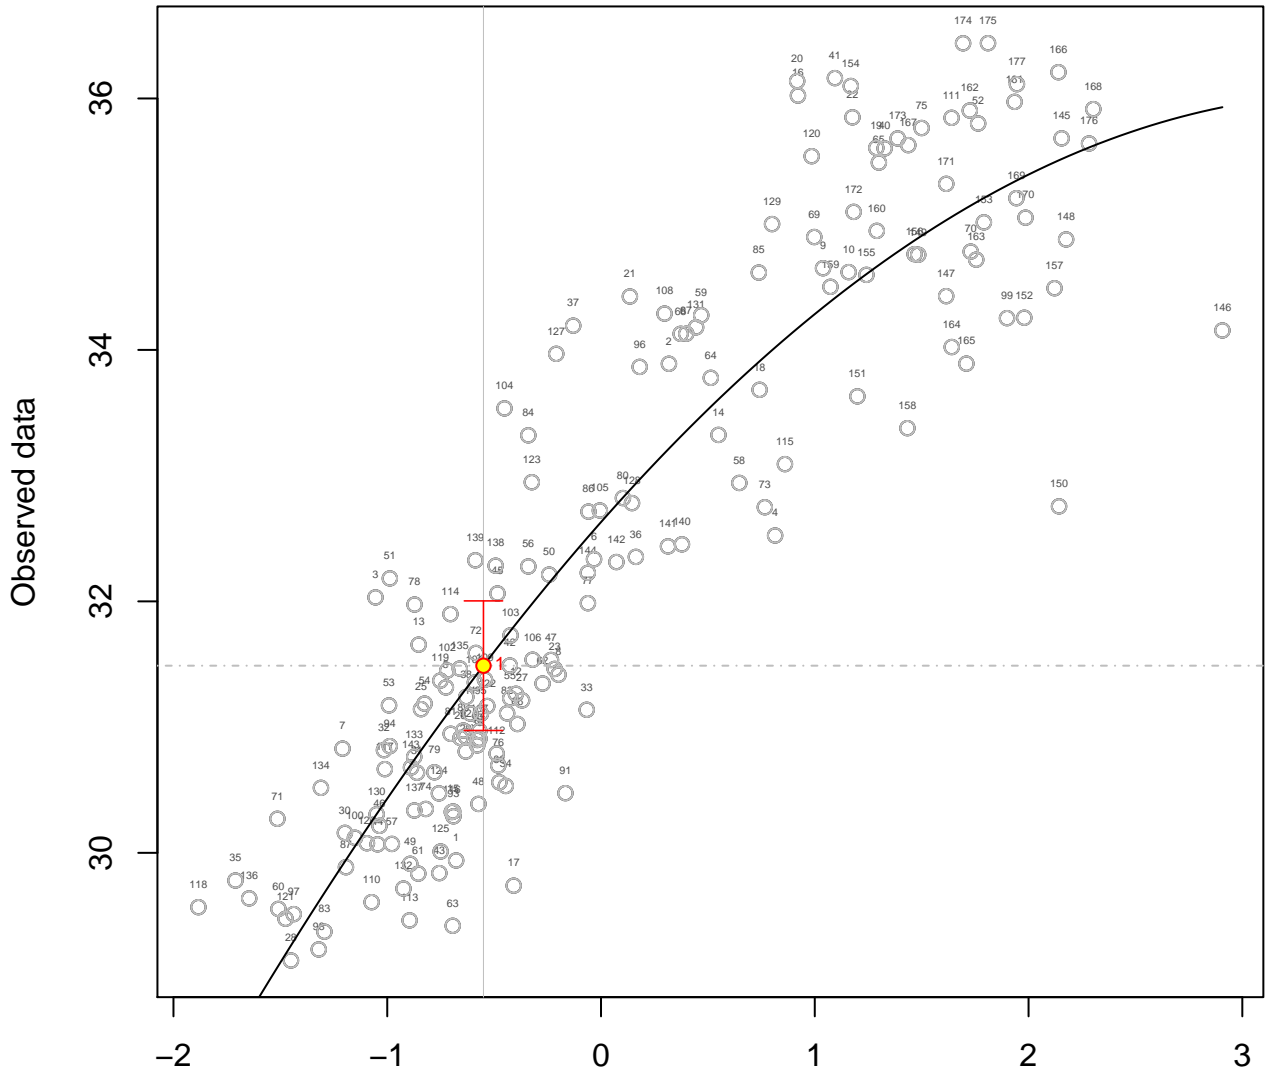

MAT (°C)

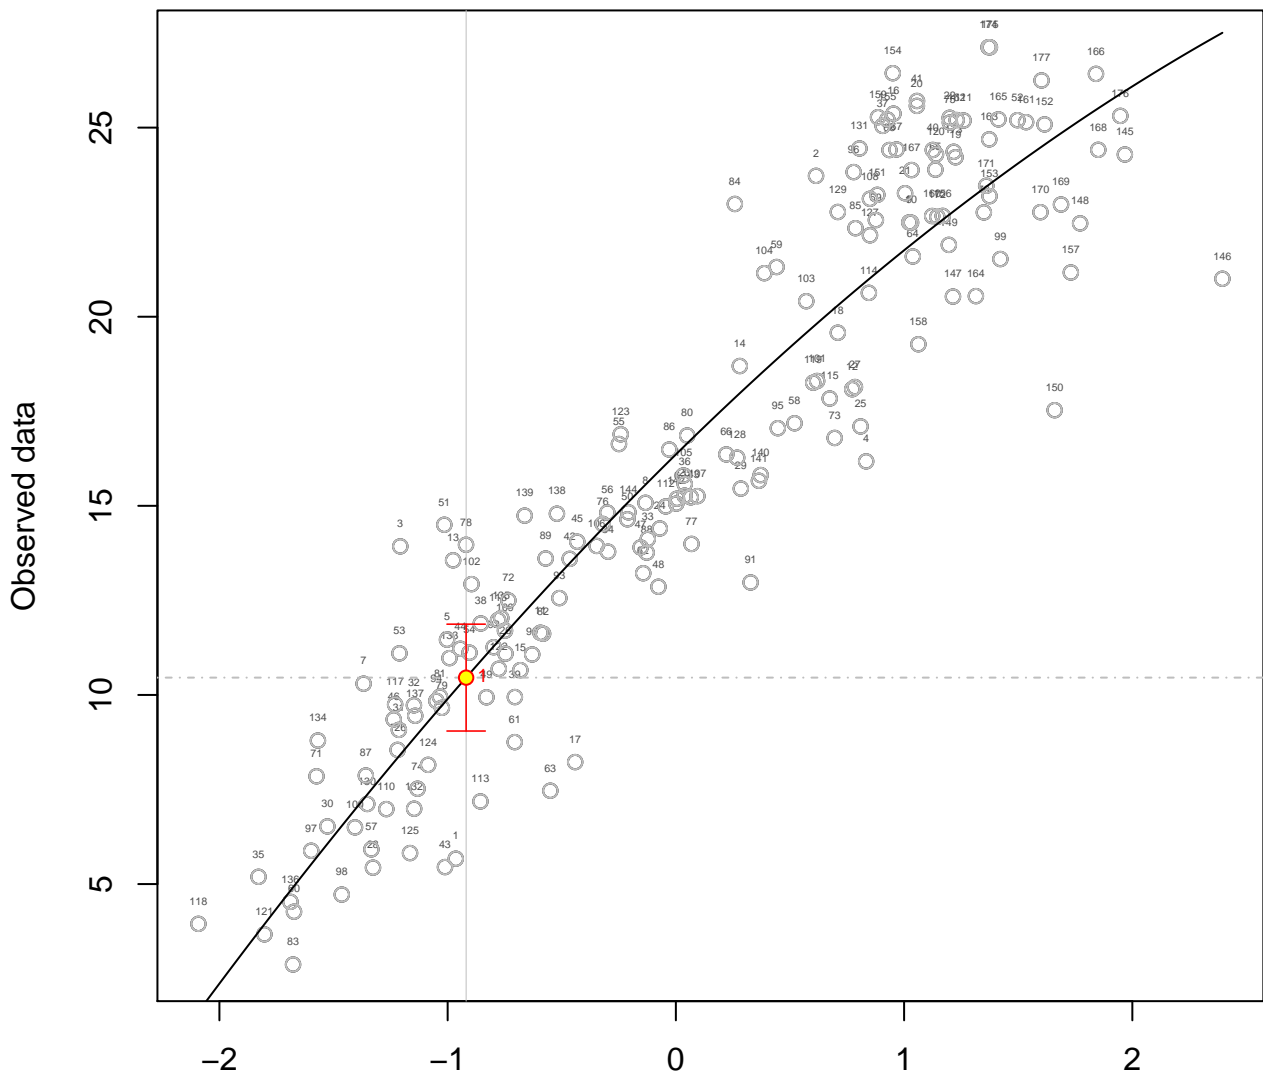



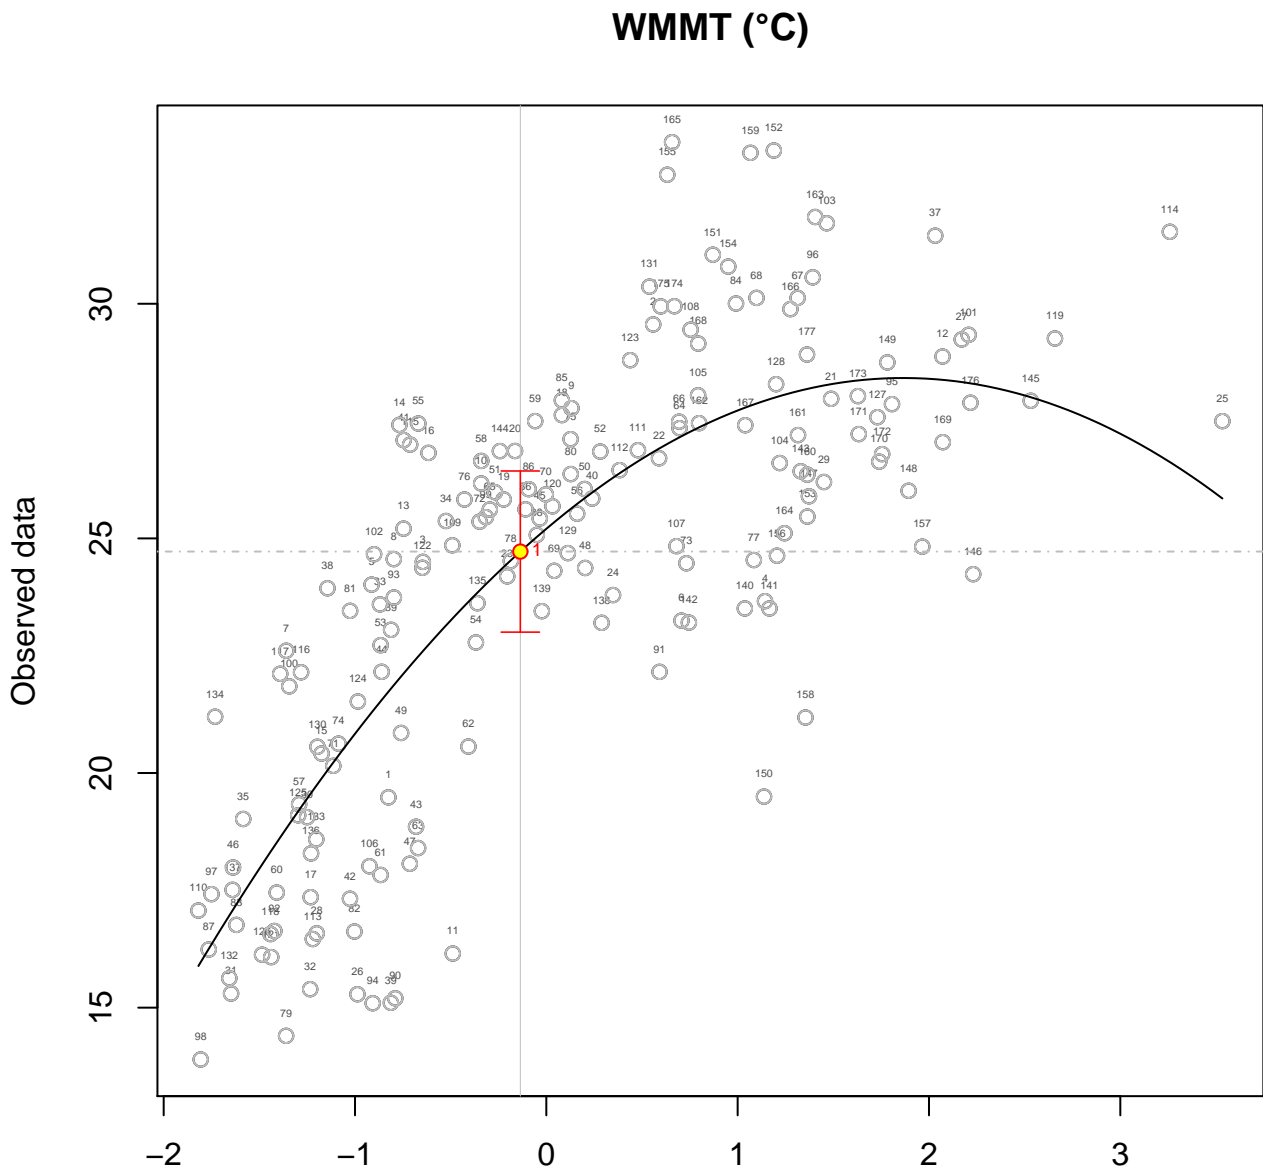

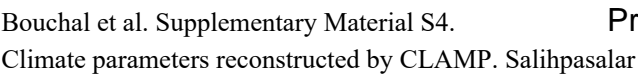

GROWSEAS (months)

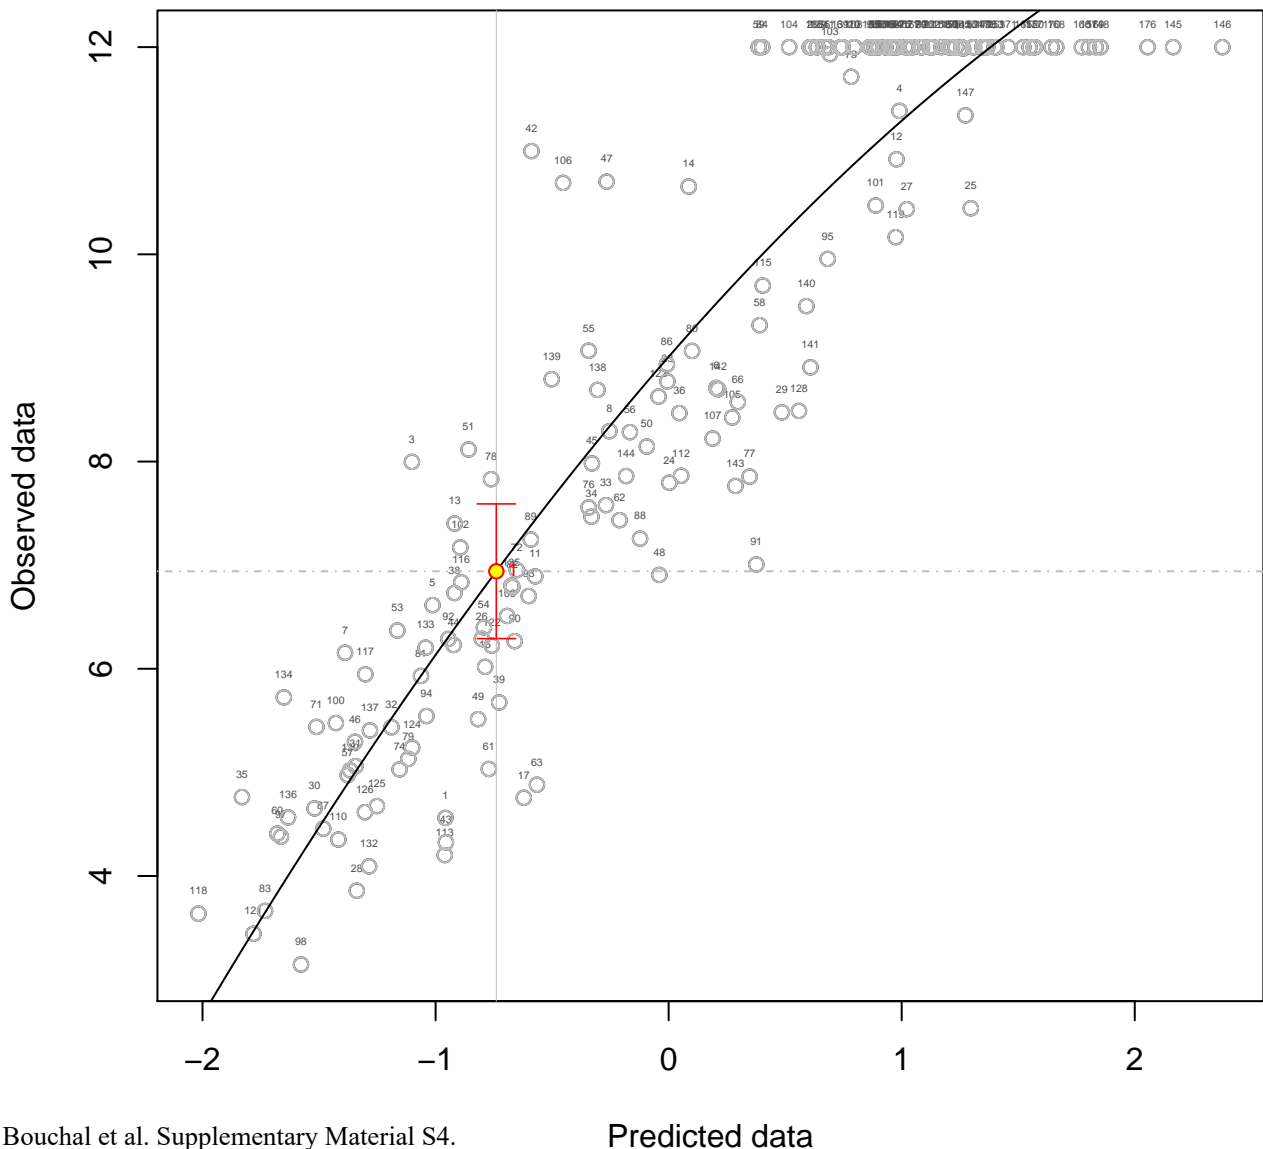

GSP (cm)

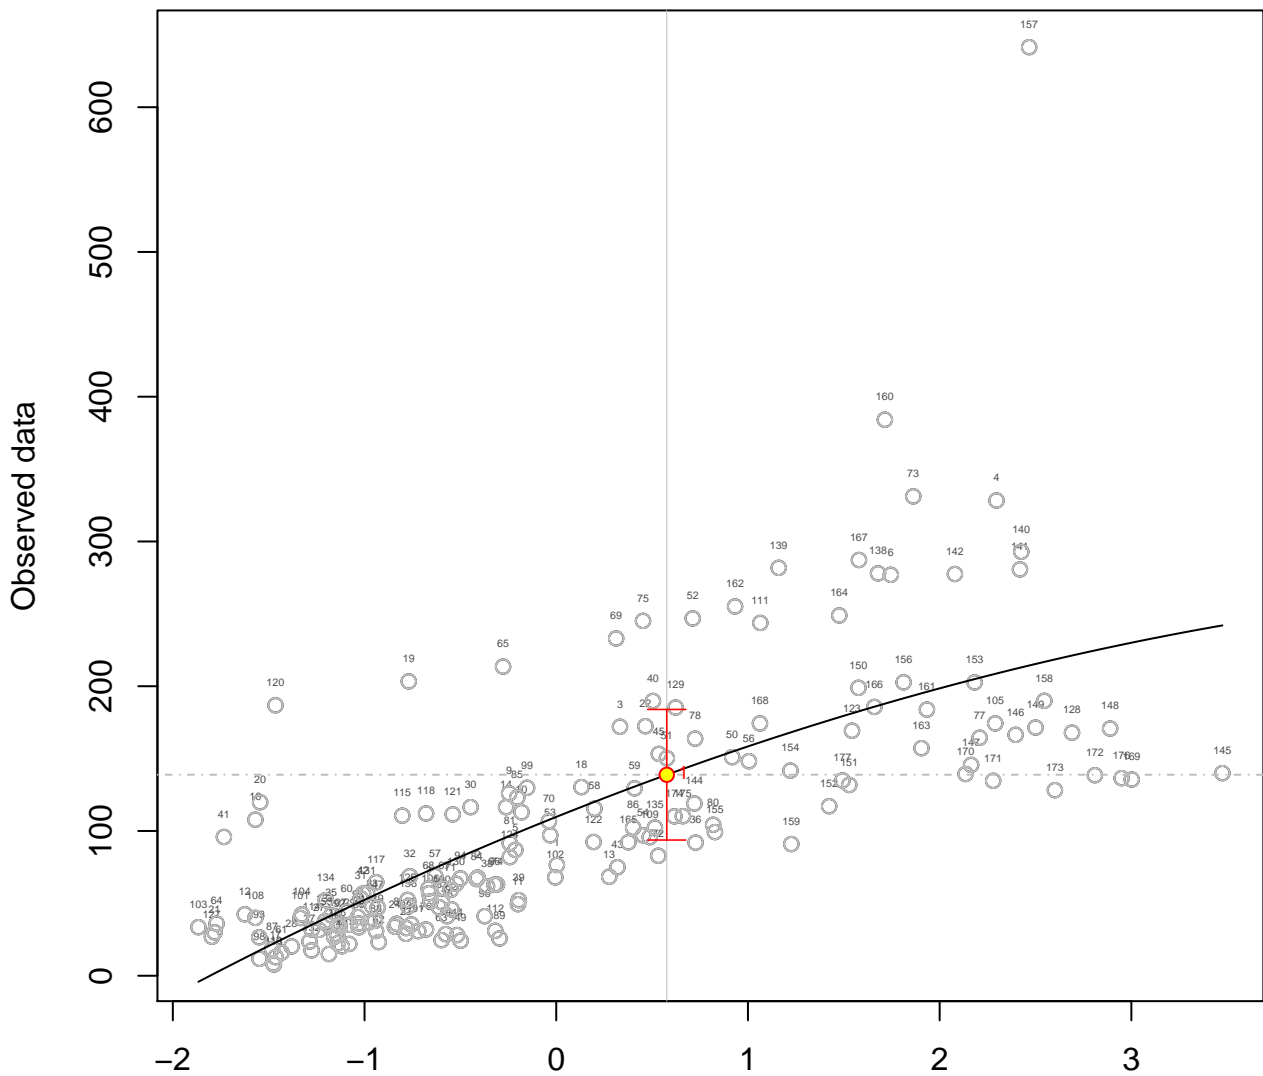

MMGSP (cm)

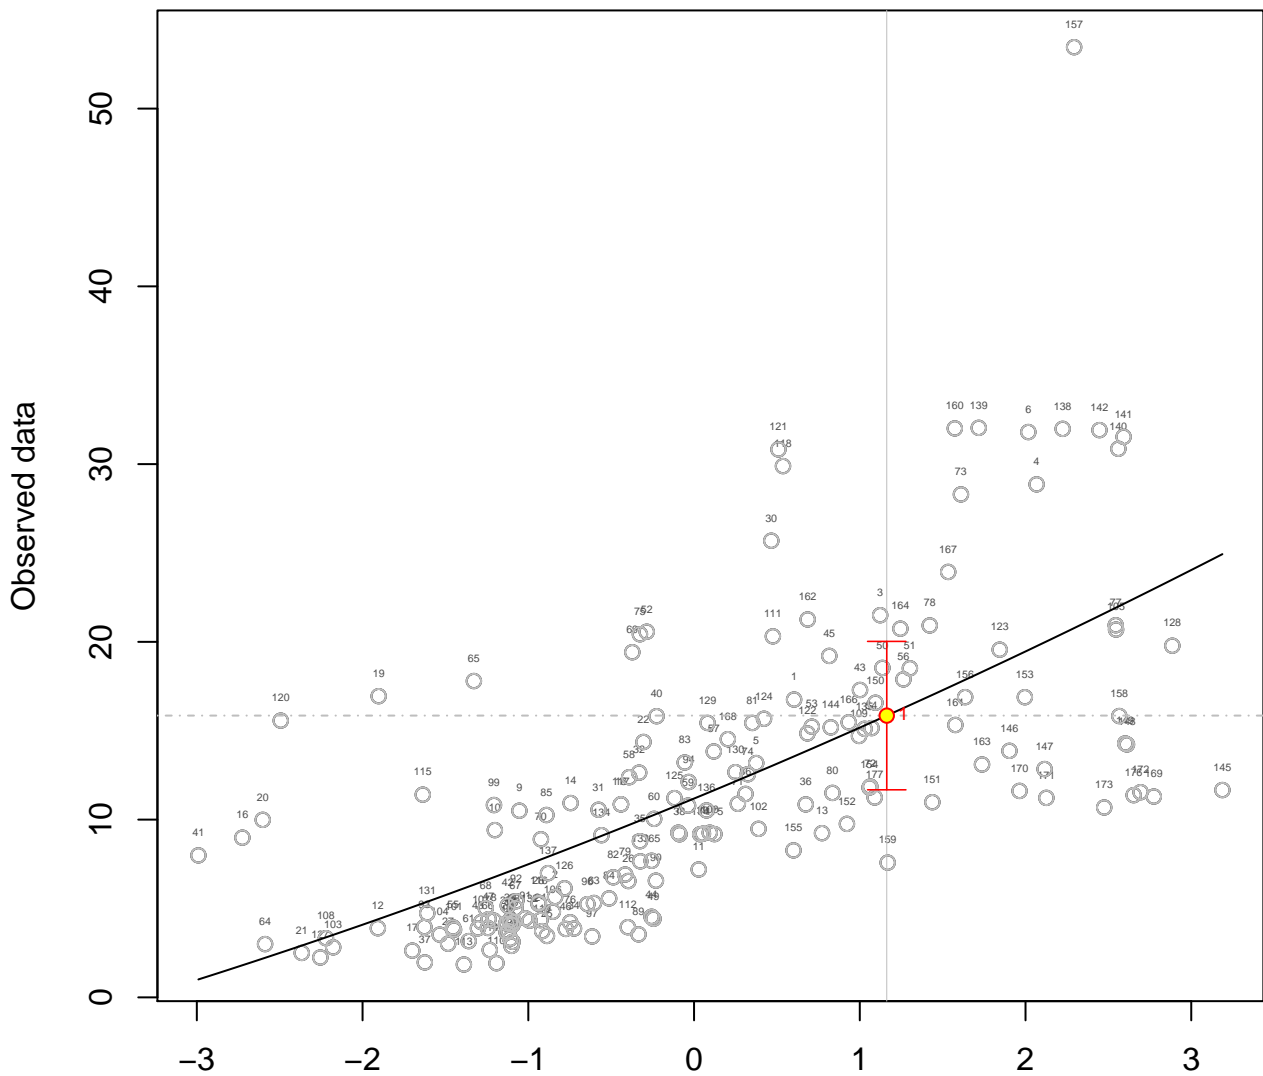

X3.WET (cm)

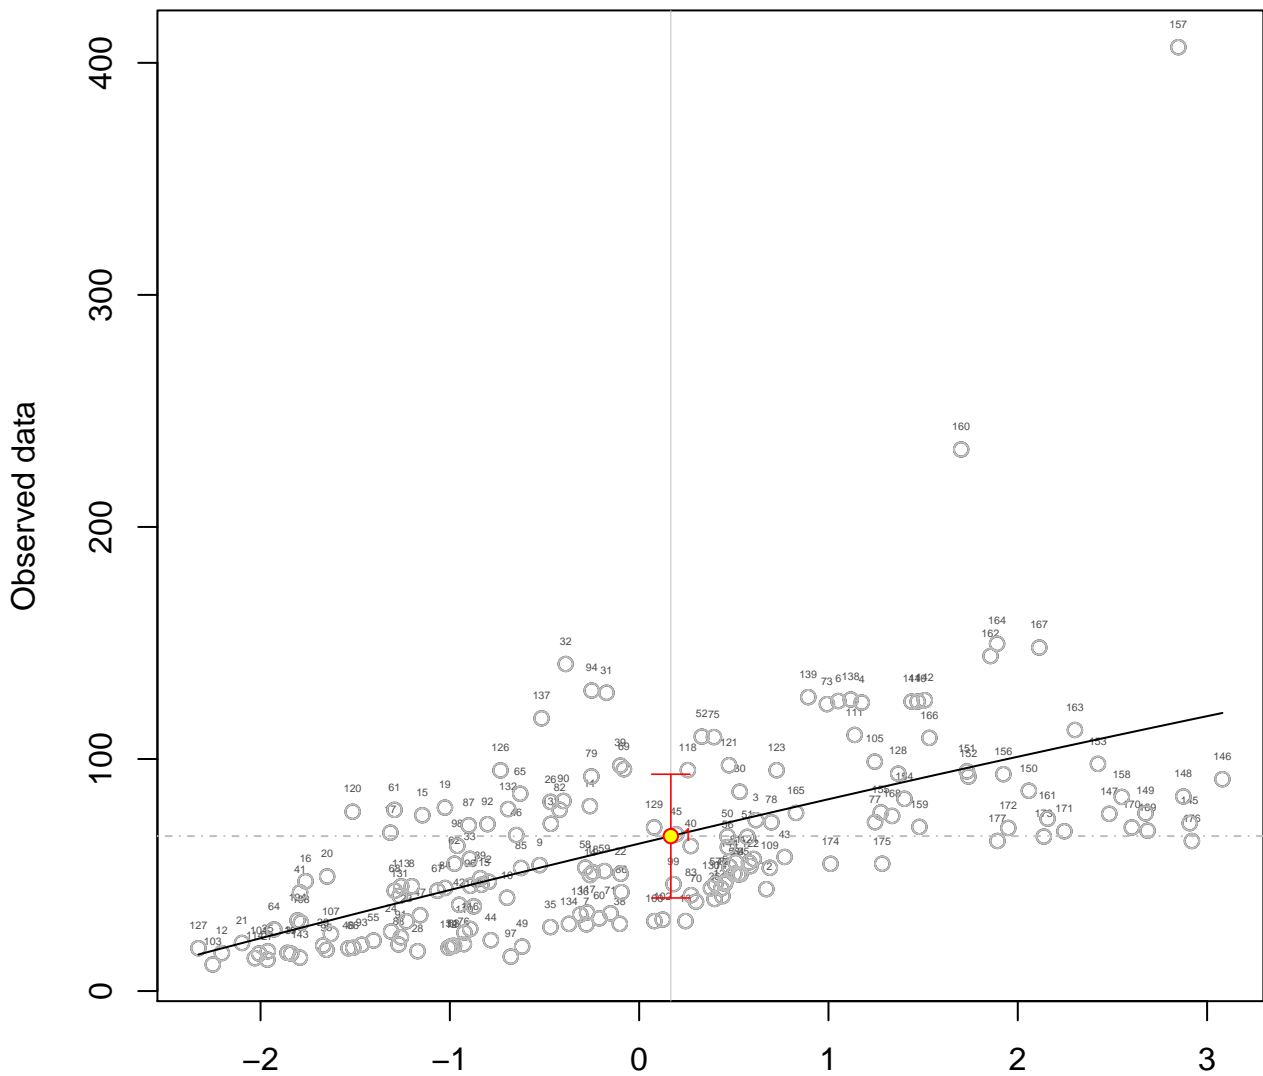

X3.DRY (cm)

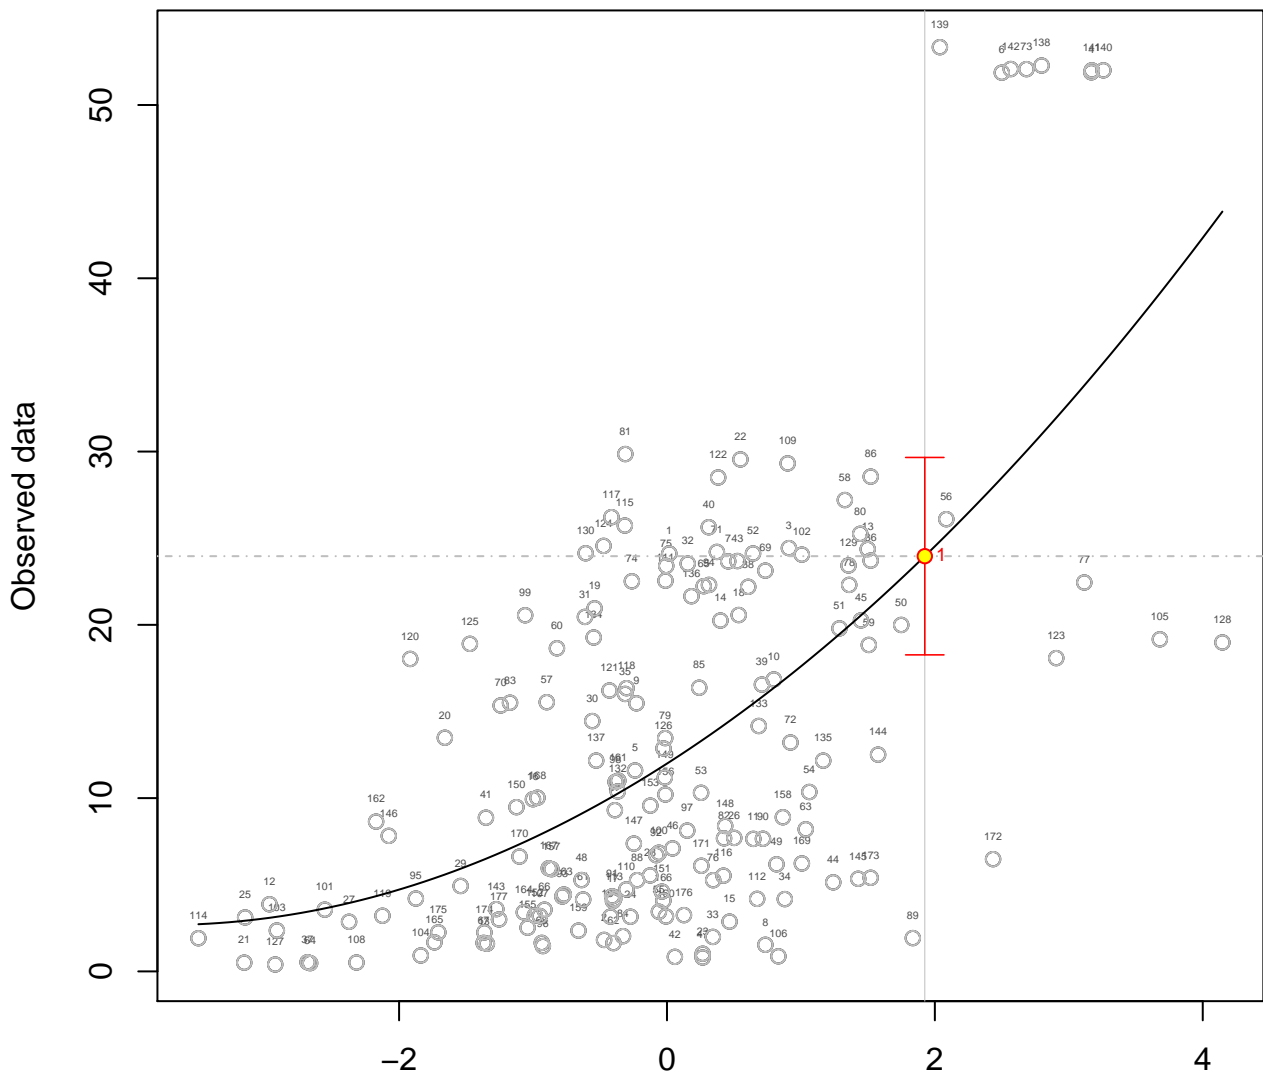

RH (%)

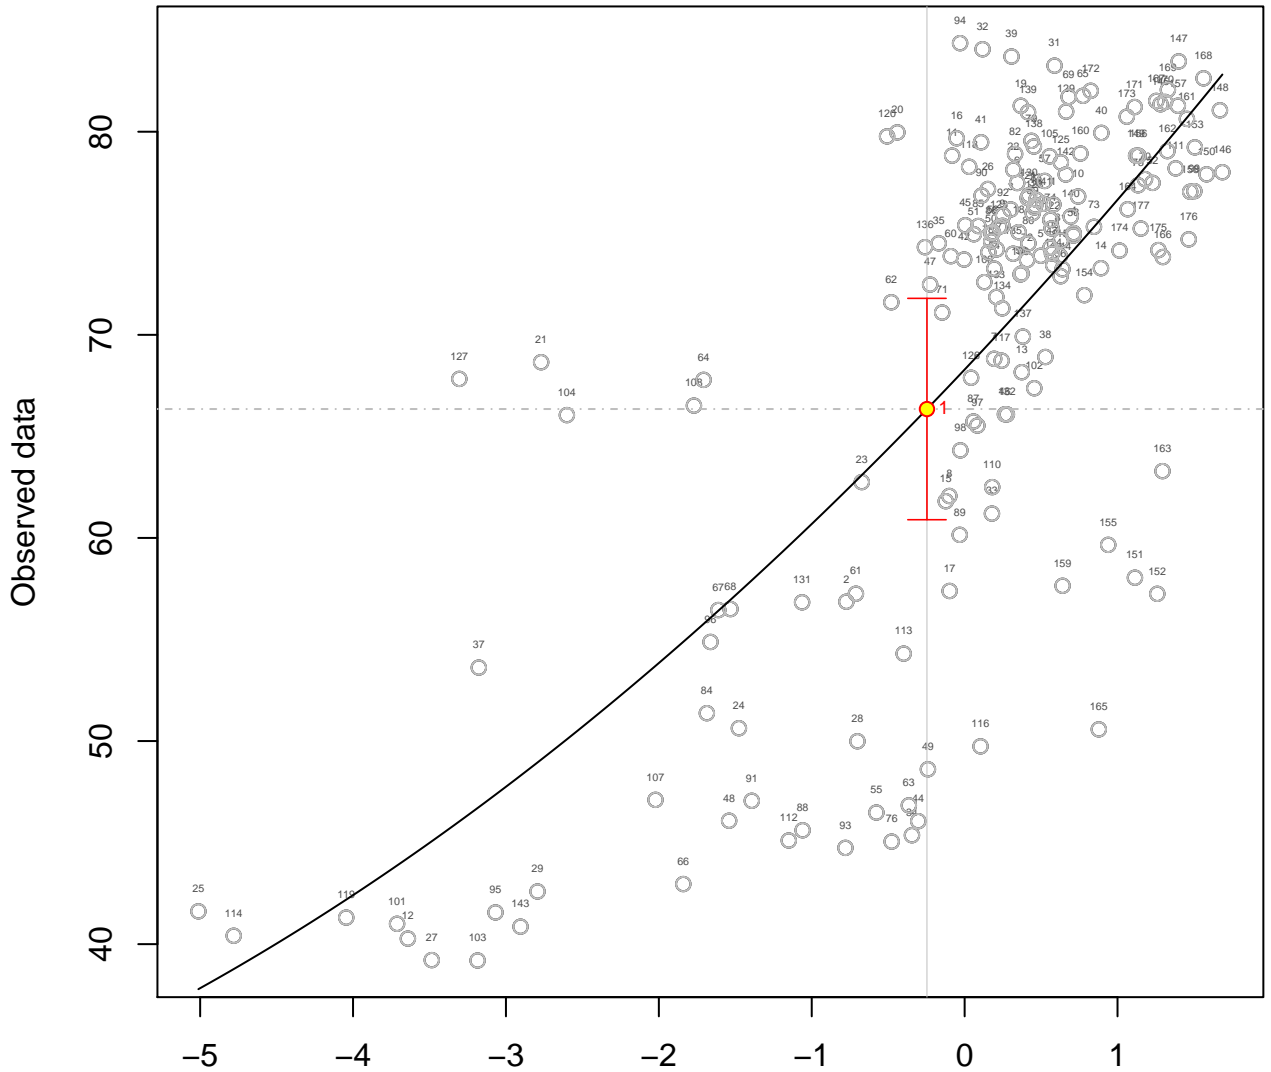



SH (g/Kg)

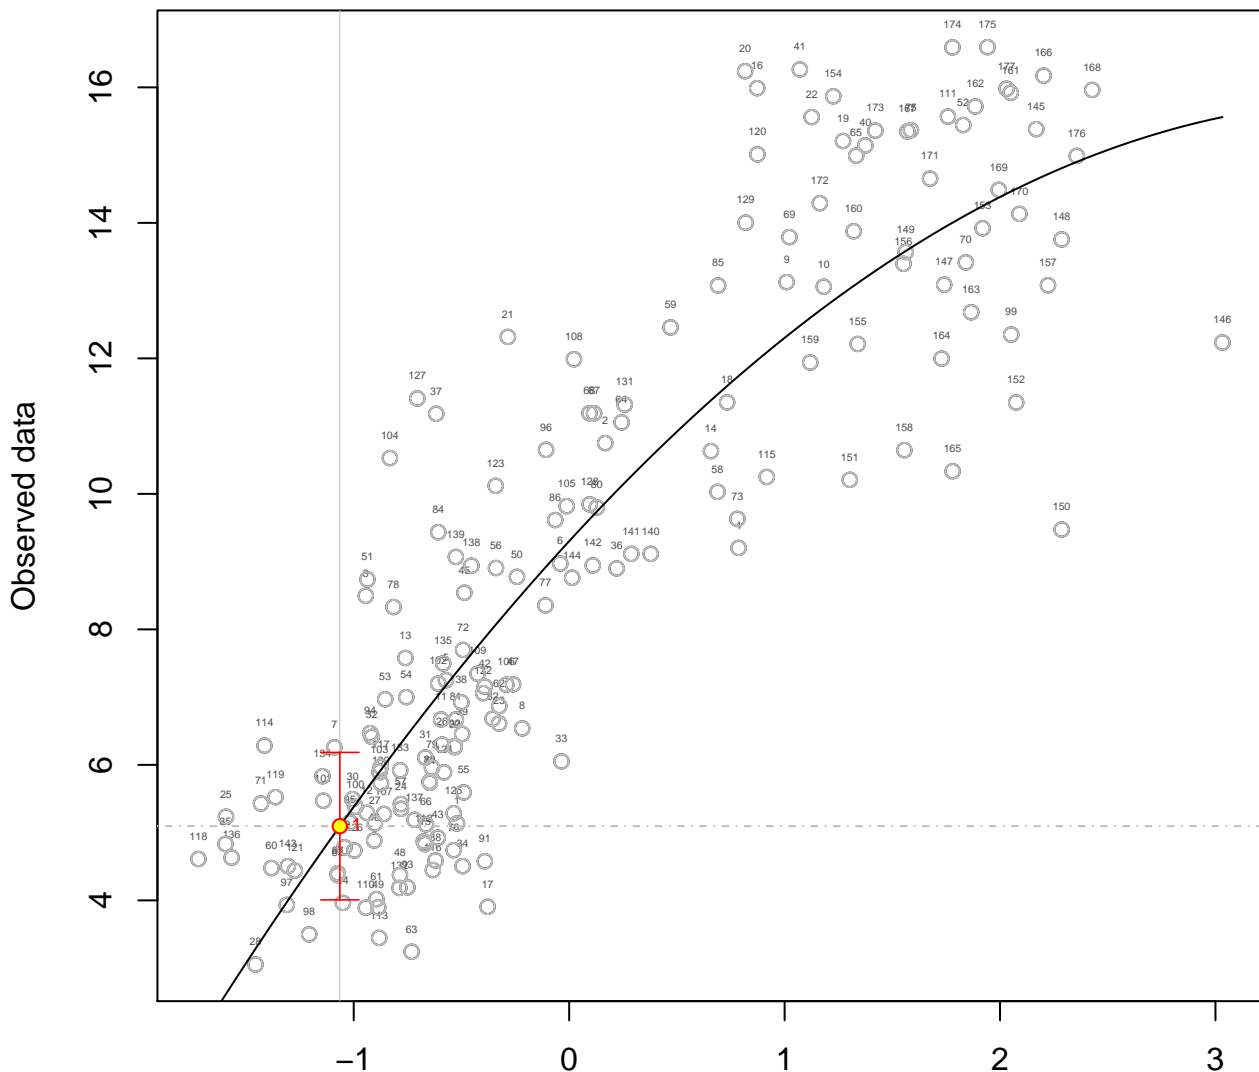

# ENTHAL (kJ/Kg)

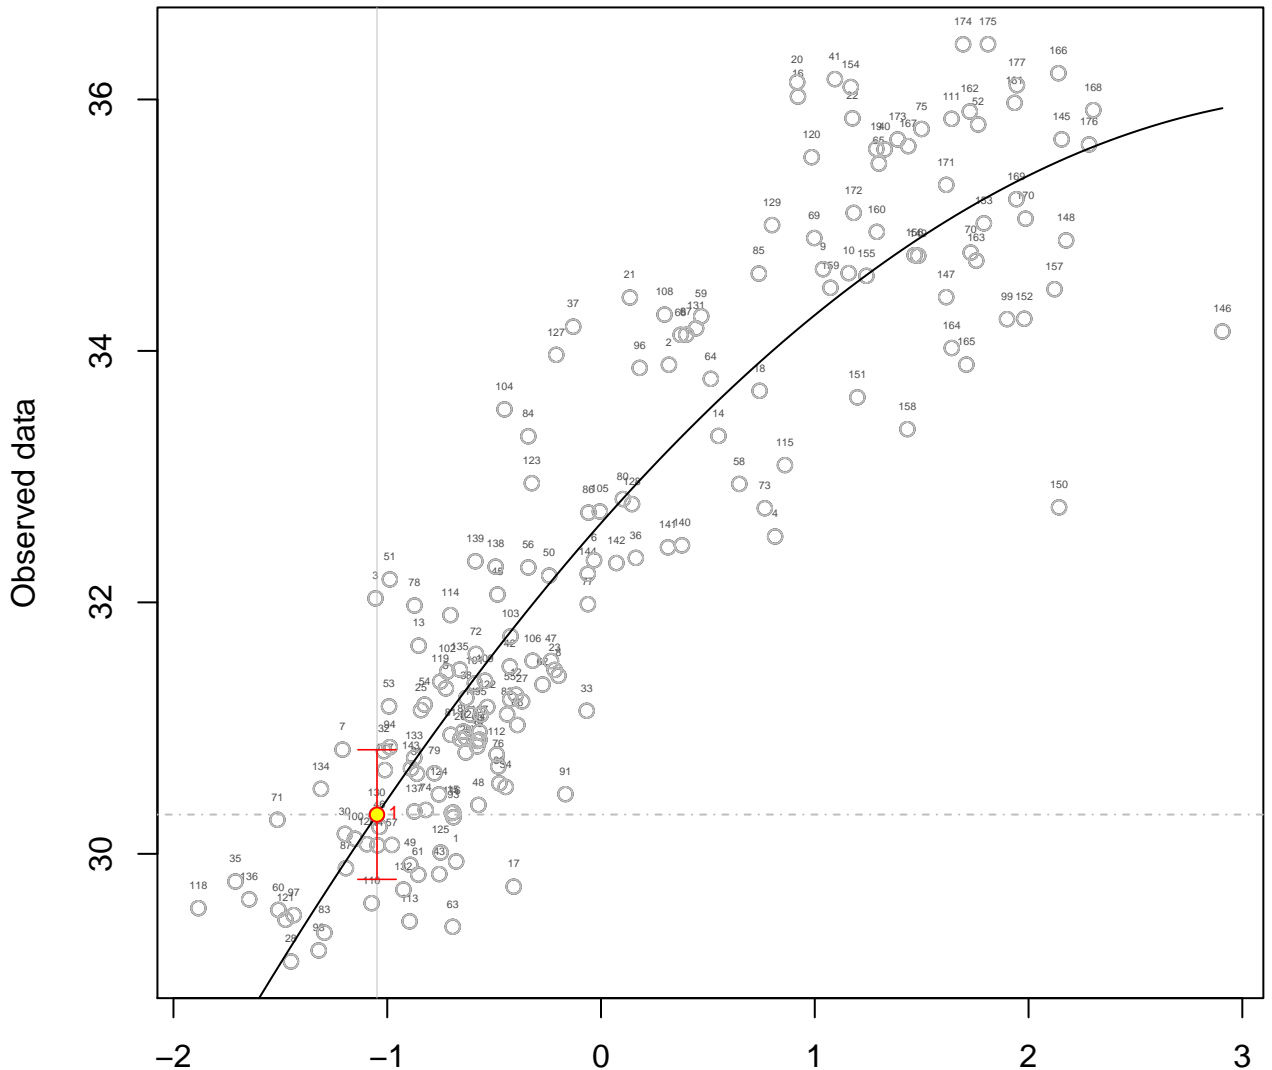

Supplement: Supplementary file 3 [file Bouchal et al S_4 CLAMP.pdf › Bouchal et al S_4 CLAMP.pdf]
