# Supplementary material for: Middle Miocene climate of southwestern Anatolia from multiple botanical proxies
Source: Copernicus journal article supplement (doi:10.5194/cp-2018-76), 2018-07-09
Supplement: Supplementary file 1 [file Bouchal et al S_1.pdf › Bouchal et al S_1.pdf]

A: Number of fossil-taxa (macrofossils and microfossils) from four middle Miocene localities (including one macrofossil horizon and four pollen zones - PZ) in the Yatağan Basin.

**Pollen & spores, cysts:**

Taxa total Eskihisar 94 (Algae 4, Spores 10, Gymn 9, Angios 71)

Taxa total Tınaz 103 (Fungus 1, Algae 7, Spores 9, Gymn 12, Angios 74)

Taxa total Salihpaşalar 96 (Algae 7, Spores 6, Gymn 11, Angios 72)

Taxa total Yenieskihisar 28 (Gymn 6, Angios 22)

**Taxa total Yatağan Basin 182 (Fungus 1, Algae 9, Spores 17, Gymn 15, Angios 140)**

Genus level Eskihisar 45 (Algae 2, Spores 3, Gymn 5, Angios 41)

Genus level Tınaz 45 (Fungus 1, Algae 2, Spores 3, Gymn 5, Angios 34)

Genus level Salihpaşalar 48 (Algae 2, Spores 5, Gymn 6, Angios 35)

Genus level Yenieskihisar 16 (Gymn 4, Angios 12)

**Genus level Yatağan 66 (Fungus 1, Algae 2, Spores 7, Gymn 6, Angios 50)**

**Macro fossils:**

Taxa total Eskihisar 55 (Gymn 5, Angios 50)

Taxa total Tınaz 56 (Gymn 3, Angios 53)

Taxa total Salihpaşalar 16 (Gymn 2, Angios 14)

**Taxa total Yatağan Basin 77 (Gymn 5, Angios 72)**

Genus level Eskihisar 27 (Gymn 3, Angios 24)

Genus level Tınaz 25 (Gymn 3, Angios 22)

Genus level Salihpaşalar 12 (Gymn 2, Angios 10)

**Genus level Yatağan 27 (Gymn 3, Angios 24)**

| Micro and macro plant fossils from the<br>Yatağan Basin      | E PZ1 | T PZ1 | S PZ1 | E PZ2 | T PZ2 | S PZ2 | T<br>PZ2/3 | YE | Categories |
|--------------------------------------------------------------|-------|-------|-------|-------|-------|-------|------------|----|------------|
| <b>Gymnosperms</b>                                           |       |       |       |       |       |       |            |    |            |
| Ephedraceae                                                  |       |       |       |       |       |       |            |    |            |
| <i>Ephedra</i> sp. (P)                                       | +     | +     | +     | +     | +     | +     | +          | +  | Z          |
| Cupressaceae                                                 |       |       |       |       |       |       |            |    |            |
| Cupressaceae gen. indet. "non papillate" (P)                 | +     | +     | +     | +     | +     | +     | +          |    | A, Z, C    |
| Cupressaceae gen. indet. "papillate" (P)                     | +     | +     |       | +     | +     | +     |            | +  | A, Z       |
| cf. <i>Glyptostrobus europaeus</i> (MF)                      |       |       |       | +     | +     | +     |            |    | A          |
| cf. <i>Taxodium</i> sp. (MF)                                 |       |       |       |       | +     | +     |            |    | A          |
| Pinaceae                                                     |       |       |       |       |       |       |            |    |            |
| <i>Cathaya</i> sp. (P)                                       | +     | +     | +     | +     | +     | +     | +          | +  | A, Z       |
| <i>Cedrus</i> sp. (P)                                        | +     | +     | +     | +     | +     | +     | +          | +  | Z          |
| <i>Picea</i> sp. (P)                                         | +     |       | +     |       |       | +     |            |    | Z          |
| <i>Pinus</i> subgenus <i>Strobus</i> sp. (Haploxyton-pollen- | +     | +     | +     | +     | +     | +     | +          | +  | Z          |
| <i>Pinus</i> subgenus <i>Pinus</i> sp. (Diploxyton-pollen-ty | +     | +     | +     | +     | +     | +     | +          | +  | Z          |
| <i>Pinus</i> sp. (MF)                                        |       |       |       | +     |       | +     |            |    | Z          |
| <i>Tsuga</i> sp. (P)                                         |       |       | +     |       | +     |       |            |    | Z          |
| <b>Angiosperms</b>                                           |       |       |       |       |       |       |            |    |            |
| Adoxaceae                                                    |       |       |       |       |       |       |            |    |            |
| <i>Viburnum</i> sp. (P)                                      |       |       |       |       |       | +     |            |    | A, Z       |
| Altingiaceae                                                 |       |       |       |       |       |       |            |    |            |
| <i>Liquidambar</i> sp. (P)                                   |       | +     | +     |       |       | +     |            |    | A, Z       |
| <i>Liquidambar europaea</i> (MF)                             |       |       |       | +     |       |       |            |    | A, Z       |
| Amarantaceae                                                 |       |       |       |       |       |       |            |    |            |
| Amaranthaceae sp. (P)                                        | +     | +     | +     | +     | +     | +     | +          | +  | A, Z, C    |
| Apiaceae (P)                                                 | +     | +     | +     | +     | +     | +     | +          | +  | A, Z, C    |
| Aquifoliaceae                                                |       |       |       |       |       |       |            |    |            |
| <i>Ilex</i> sp. (P)                                          |       |       |       |       | +     | +     |            |    | A, Z, C    |
| Araliaceae                                                   |       |       |       |       |       |       |            |    |            |
| Araliaceae gen. indet. (P)                                   |       |       |       |       |       | +     |            |    | A, Z, C    |
| Asteraceae (P)                                               | +     | +     | +     | +     | +     | +     | +          | +  | A, Z, C    |
| Berberidiaceae                                               |       |       |       |       |       |       |            |    |            |
| <i>Mahonia grimmii</i> (MF)                                  |       |       |       | +     | +     | +     |            |    | A, Z       |
| Betulaceae                                                   |       |       |       |       |       |       |            |    |            |
| <i>Alnus</i> sp. (P)                                         | +     | +     | +     | +     | +     | +     | +          | +  | A, Z       |
| <i>Alnus cecropiifolia</i> (MF)                              |       |       |       | +     | +     |       |            |    | A, Z       |
| <i>Alnus</i> cf. <i>julianiformis</i> (MF)                   |       |       |       | +     |       |       |            |    | A, Z       |
| <i>Betula</i> sp. (P)                                        | +     | +     | +     | +     | +     | +     | +          | +  |            |
| <i>Carpinus</i> sp. (P)                                      | +     | +     | +     | +     | +     | +     |            | +  | Z          |
| <i>Carpinus grandis</i> (MF)                                 |       |       |       | +     | +     |       |            |    | Z          |
| <i>Carpinus</i> sp. 3 fruit types (MF)                       |       |       |       | +     | +     |       |            |    | Z          |
| <i>Corylus</i> sp (P)                                        | +     | +     | +     | +     | +     | +     | +          |    | Z          |
| <i>Ostrya</i> sp. (P)                                        | +     | +     | +     | +     | +     | +     | +          |    | Z          |
| Buxaceae                                                     |       |       |       |       |       |       |            |    |            |
| <i>Buxus</i> sp. ( <i>balearica</i> type) (P)                | +     |       |       | +     |       | +     |            |    | Z          |
| <i>Buxus pliocenica</i>                                      |       |       |       | +     | +     |       |            |    | Z          |
| Campanulaceae                                                |       |       |       |       |       |       |            |    |            |
| Campanuloideae gen. indet. (P)                               |       |       |       |       | +     |       | +          |    | Z, C       |
| Cannabaceae                                                  |       |       |       |       |       |       |            |    |            |
| <i>Celtis</i> vel <i>Pteroceltis</i> sp. (P)                 |       |       | +     |       |       | +     |            |    | Z          |
| Caprifoliaceae                                               |       |       |       |       |       |       |            |    |            |
| <i>Lonicera</i> sp. (P)                                      |       |       |       |       |       |       |            |    | A, Z       |
| Linnaeoideae gen. indet. (P)                                 |       |       |       |       |       |       |            |    | A, Z       |
| Dipsacoideae (P)                                             |       |       |       |       |       |       |            |    | A, Z, C    |
| Valerianoideae (P)                                           |       |       |       |       |       | +     |            | +  | A, Z       |
| Caryophyllaceae                                              |       |       | +     |       |       | +     |            |    |            |
| Caryophyllaceae gen. indet. (P)                              |       |       |       |       |       |       |            | +  | A, Z, C    |
| Convolvulaceae                                               |       |       |       |       |       |       |            |    |            |
| <i>Convolvulus</i> sp. (P)                                   | +     | +     |       |       | +     |       |            |    | A, Z, C    |
| Droseraceae                                                  |       |       |       |       |       |       |            |    |            |
| <i>Drosera</i> sp. (P)                                       |       |       | +     |       |       |       |            |    | A, Z, C    |
| Ericaceae                                                    |       |       |       |       |       |       |            |    |            |

|                                                                    |   |   |   |   |   |   |   |   |         |
|--------------------------------------------------------------------|---|---|---|---|---|---|---|---|---------|
| Ericaceae gen. indet. (P)                                          | + |   |   |   |   |   |   |   | A, Z, C |
| <i>Erica</i> sp. (P)                                               | + |   |   |   |   |   |   |   | A, Z    |
| Eucommiaceae                                                       |   |   |   |   |   |   |   |   |         |
| <i>Eucommia</i> sp. (P)                                            | + | + | + | + | + | + | + |   | Z       |
| Euphorbiaceae                                                      |   |   |   |   |   |   |   |   |         |
| Euphorbiaceae gen. indet. (P)                                      | + | + | + | + | + | + |   |   | A, Z, C |
| Fabaceae                                                           |   |   |   |   |   |   |   |   |         |
| <i>Apios</i> sp. (P)                                               | + |   |   |   |   |   |   |   | A, Z    |
| Fabaceae gen. et spec. indet 1–7 (MF)                              |   |   |   | + | + |   |   |   | A, Z    |
| Fagaceae                                                           |   |   |   |   |   |   |   |   |         |
| <i>Fagus</i> sp. (P)                                               | + | + | + | + | + | + | + |   | Z       |
| <i>Fagus gussonii</i> (MF)                                         |   |   |   | + | + |   |   |   | Z       |
| <i>Quercus</i> subgen. <i>Cerris</i> sect. <i>Cerris</i> sp. (P)   | + | + | + | + | + | + | + | + | Z       |
| <i>Quercus kubinyii</i> (MF)                                       |   |   |   | + | + |   |   |   | Z       |
| <i>Quercus</i> subgen. <i>Cerris</i> sect. <i>Ilex</i> sp. (P)     | + | + | + | + | + | + | + | + | Z       |
| <i>Quercus drymeja</i> (MF)                                        |   |   |   | + | + | + |   |   | Z       |
| <i>Quercus mediterranea</i> (MF)                                   |   |   |   | + | + | + |   |   | Z       |
| <i>Quercus sosnowskyi</i> (MF)                                     |   |   |   | + | + | + |   |   | Z       |
| <i>Quercus</i> sp. cupule (MF)                                     |   |   |   | + | + |   |   |   | Z       |
| <i>Quercus</i> subgen. <i>Quercus</i> sect. <i>Quercus</i> sp. (P) | + | + | + | + | + | + | + | + | Z       |
| <i>Quercus gigas</i> (MF)                                          |   |   |   | + | + |   |   |   | Z       |
| Castanoideae gen. indet. (P)                                       | + | + |   | + | + |   | + | + | Z       |
| Geraniaceae                                                        |   |   |   |   |   |   |   |   |         |
| <i>Erodium</i> sp. (P)                                             | + | + | + | + | + |   | + |   | A, Z, C |
| Hamamelidaceae                                                     |   |   |   |   |   |   |   |   |         |
| <i>Parrotia</i> sp. (P)                                            |   |   |   |   |   |   |   | + | Z       |
| Juglandaceae                                                       |   |   |   |   |   |   |   |   |         |
| Engelhardioideae gen. indet. sp. (P)                               | + | + | + | + | + | + |   |   | A, Z    |
| <i>Carya</i> sp. (P)                                               | + | + | + | + | + | + | + | + | A, Z    |
| <i>Carya</i> cf. <i>minor</i> (MF)                                 |   |   |   | + |   |   |   |   | A, Z    |
| <i>Juglans</i> sp. (P)                                             | + |   | + | + |   | + |   | + | Z       |
| <i>Juglans acuminata</i> (MF)                                      |   |   |   | + | + | + |   |   | Z       |
| <i>Pterocarya</i> vel <i>Cyclocarya</i> sp. (P)                    | + |   | + | + |   | + |   | + | A, Z    |
| <i>Pterocarya paradisiaca</i> (MF)                                 |   |   |   |   | + |   |   |   | A, Z    |
| Linaceae                                                           |   |   |   |   |   |   |   |   |         |
| <i>Linum</i> sp. ( <i>austriacum</i> type) (P)                     |   |   |   | + | + |   |   |   | Z, C    |
| Lythraceae                                                         |   |   |   |   |   |   |   |   |         |
| <i>Decodon</i> sp. (P)                                             | + | + | + | + | + | + | + |   | A       |
| Malvaceae                                                          |   |   |   |   |   |   |   |   |         |
| Malvoideae gen. indet. (P)                                         | + |   |   |   |   |   |   |   | A, Z    |
| <i>Tilia</i> sp. (P)                                               | + |   | + | + |   | + |   |   | Z       |
| <i>Tilia</i> sp. (MF)                                              |   |   |   | + | + |   |   |   | Z       |
| Moraceae vel Urticaceae                                            |   |   |   |   |   |   |   |   |         |
| Moraceae vel Urticaceae gen. indet. (P)                            |   |   | + |   |   |   |   |   | A, Z, C |
| Myricaceae                                                         |   |   |   |   |   |   |   |   |         |
| <i>Morella</i> vel <i>Myrica</i> sp. (P)                           | + | + | + | + | + | + | + | + | A, Z    |
| <i>Myrica lignitum</i> (MF)                                        |   |   |   | + | + | + |   |   | A, Z    |
| Nitrariaceae                                                       |   |   |   |   |   |   |   |   |         |
| <i>Nitraria</i> sp. (P)                                            |   |   |   | + |   |   | + |   | A, Z    |
| Nyssaceae                                                          |   |   |   |   |   |   |   |   |         |
| <i>Dicotylophyllum</i> 14 aff. <i>Nyssa</i> (MF)                   |   |   |   |   | + |   |   |   | A, Z    |
| Oleaceae                                                           |   |   |   |   |   |   |   |   |         |
| Oleaceae aff. <i>Olea</i> & <i>Chionanthus</i> (P)                 | + | + | + | + | + | + | + |   | Z       |
| Oleaceae <i>Phillyrea</i> , <i>Linociera</i> & <i>Noronhia</i> (P) | + | + | + | + | + | + | + |   | Z       |
| Oleaceae <i>Olea</i> , <i>Fontanesia</i> & <i>Osmanthus</i> (P)    |   | + | + |   | + | + | + |   | Z       |
| Oleaceae aff. <i>Olea</i> & <i>Osmanthus</i> (P)                   | + | + |   | + | + |   | + |   | Z       |
| Oleaceae aff. <i>Fraxinus</i> (P)                                  | + | + |   | + | + |   |   |   | A, Z    |
| Oleaceae aff. <i>Ligustrum</i> (P)                                 |   | + |   |   | + |   |   |   | Z       |
| Onagraceae                                                         |   |   |   |   |   |   |   |   |         |
| <i>Ludwigia</i> sp. (P)                                            | + |   |   |   |   |   |   |   | A, C    |
| Plumbaginaceae (P)                                                 |   |   |   | + | + |   |   |   | A, Z, C |
| Poaceae                                                            |   |   |   |   |   |   |   |   |         |
| Poaceae sp. (P)                                                    | + | + | + | + | + | + | + |   | A, Z, C |

|                                                      |   |   |   |   |   |   |   |   |         |
|------------------------------------------------------|---|---|---|---|---|---|---|---|---------|
| <i>Phragmites</i> cf. <i>oehningensis</i> (MF)       |   |   |   |   | + | + | + |   | A, C    |
| Polygalaceae                                         |   |   |   |   |   |   |   | + | A, Z, C |
| Polygonaceae                                         |   |   |   |   |   |   |   |   |         |
| <i>Persicaria</i> sp. ( <i>P. amphibia</i> type) (P) |   |   |   |   |   |   |   |   | A, Z, C |
| <i>Polygonum</i> ( <i>P. aviculare</i> type) (P)     | + |   |   |   |   |   |   |   | A, Z, C |
| <i>Rumex</i> sp. (P)                                 | + | + | + | + | + | + | + |   | A, Z, C |
| Ranunculaceae                                        |   |   |   |   |   |   |   |   |         |
| Ranunculaceae sp. (P)                                |   |   | + |   | + | + |   |   | A, Z, C |
| Rosaceae                                             |   |   |   |   |   |   |   |   |         |
| Rosaceae gen. indet. sp. (P)                         |   |   | + | + |   | + |   | + | A, Z, C |
| <i>Sorbus</i> sp. (MF)                               |   |   |   | + |   |   |   |   | Z       |
| <i>Dicotylophyllum</i> 18 aff. <i>Spiraea</i> (MF)   |   |   |   |   |   | + |   |   | A, Z    |
| Salicaceae                                           |   |   |   |   |   |   |   |   |         |
| <i>Populus populina</i> (MF)                         |   |   |   | + | + | + |   |   | A       |
| <i>Populus balsamoides</i> (MF)                      |   |   |   | + | + |   |   |   | A       |
| <i>Populus</i> sp. aff. <i>P. grandidentata</i> (MF) |   |   |   | + |   |   |   |   | A       |
| <i>Salix</i> sp. (P)                                 |   | + | + |   |   |   | + |   | A       |
| <i>Salix lavateri</i> (MF)                           |   |   |   | + | + |   |   |   | A       |
| Sapindaceae                                          |   |   |   |   |   |   |   |   |         |
| <i>Acer</i> sp. (P)                                  | + | + | + | + | + | + | + |   | A, Z    |
| cf. <i>Acer aegopodifolium</i> (MF)                  |   |   |   |   |   | + |   |   | Z       |
| <i>Acer dasycarpoides</i> (MF)                       |   |   |   | + | + |   |   |   | A, Z    |
| <i>Acer decipiens</i> (MF)                           |   |   |   |   |   | + |   |   | Z       |
| <i>Acer ilnicense</i> (MF)                           |   |   |   | + | + |   |   |   | Z       |
| <i>Acer integrilobium</i> (MF)                       |   |   |   | + | + |   | + |   | Z       |
| <i>Acer pyrenaicum</i> (MF)                          |   |   |   | + | + |   |   |   | Z       |
| <i>Acer subcampestre</i> (MF)                        |   |   |   |   |   | + |   |   | Z       |
| <i>Acer tricuspidatum</i> (MF)                       |   |   |   | + | + |   | + |   | A, Z    |
| <i>Acer</i> sp. 3 samara types (MF)                  |   |   |   | + | + |   |   |   | A, Z    |
| <i>Sapindus falcifolius</i> (MF)                     |   |   |   | + | + |   |   |   | Z       |
| Sapotaceae                                           |   |   |   |   |   |   |   |   |         |
| Sapotoideae gen. indet. sp. (P)                      |   |   |   |   |   | + | + |   | A, Z    |
| Simaroubaceae                                        |   |   |   |   |   |   |   |   |         |
| aff. <i>Ailanthus</i> sp. (P)                        | + |   |   |   |   |   |   |   | Z       |
| <i>Picrasma</i> sp. (P)                              |   | + |   |   |   |   |   |   | Z       |
| Smilacaceae                                          |   |   |   |   |   |   |   |   |         |
| <i>Smilax</i> sp. ( <i>aspera</i> type) (P)          |   |   |   |   |   | + |   |   | A, Z    |
| <i>Smilax miohavanensis</i> (L)                      |   |   |   | + | + | + |   |   | A, Z    |
| Typhaceae                                            |   |   |   |   |   |   |   |   |         |
| Typhaceae gen. indet. (P)                            | + | + | + | + | + | + | + |   | A, C    |
| <i>Typha</i> cf. <i>latissima</i> (MF)               |   |   |   |   |   | + | + |   | A, C    |
| Ulmaceae                                             |   |   |   |   |   |   |   |   |         |
| <i>Ulmus</i> sp. (P)                                 | + | + | + | + | + | + | + | + | A, Z    |
| <i>Ulmus longifolia</i> (MF)                         |   |   |   | + |   |   |   |   | A       |
| <i>Zelkova</i> sp. (P)                               | + | + | + | + | + | + | + | + | A, Z    |
| <i>Zelkova zelkovifolia</i> (MF)                     |   |   |   | + | + | + |   |   | A, Z    |

**E = Eskihisar**  
**T = Tınaz**  
**S = Salihpaşalar**  
**YE = Yenieskihisar**  
**PZ = Pollen Zone**  
**A = Azonal**  
**Z = Zonal**  
**C = Cosmopolitan**
