# Supplementary material for: Middle Miocene climate of southwestern Anatolia from multiple botanical proxies
Source: Copernicus journal article supplement (doi:10.5194/cp-2018-76), 2018-07-09
Supplement: Supplementary file 1 [file Bouchal et al S_3 genus level climscore.xlsx]

## Sheet: mod species Köppen
Lineage	Genus	Subgenus*	Species/species complex	Reference	Possible pollen type	Af	Am	As	Aw	Cfa	Cfb	Cfc	Dfa	Dfb	Dfc	Dfd	Cwa	Cwb	Dwa	Dwb	Dwc	ET	Csa	Csb	Dsa	Dsb	Dsc	BSh	BSk	BWh	BWk	k
Gnetales: Ephedraceae	Ephedra	NA Clade	Ephedra antisyphilitica Berl. Ex. C.A.Mey.	FNA, PDB, Bolinder et al. 2016, GBIF	Ephedra sp.	0	0	0	0	1	1	0	0	0	0	0	1	1	0	0	0	0	0	0	0	0	0	1	1	1	0
Gnetales: Ephedraceae	Ephedra	NA Clade	Ephedra aspera Engelm. Ex S.Watson	FNA, PDB, Bolinder et al. 2016, GBIF	Ephedra sp.	0	0	0	0	1	1	0	0	0	0	0	1	1	0	0	0	0	1	1	0	0	0	1	1	1	0
Gnetales: Ephedraceae	Ephedra	NA Clade	Ephedra californica S.Watson	FNA, PDB, Bolinder et al. 2016, GBIF	Ephedra sp.	0	0	0	0	0	0	0	0	0	0	0	0	0	0	0	0	0	1	1	0	0	0	1	1	1	1
Gnetales: Ephedraceae	Ephedra	NA Clade	Ephedra coryi E.L.Reed	FNA, PDB, Bolinder et al. 2016, GBIF	Ephedra sp.	0	0	0	0	0	0	0	0	0	0	0	0	0	0	0	0	0	0	0	0	0	0	1	1	0	0
Gnetales: Ephedraceae	Ephedra	NA Clade	Ephedra cutleri Peebles	FNA, PDB, Bolinder et al. 2016, GBIF	Ephedra sp.	0	0	0	0	0	0	0	0	0	0	0	0	0	0	0	0	0	1	1	0	0	0	0	1	0	1
Gnetales: Ephedraceae	Ephedra	NA Clade	Ephedra funera Coville & Morton	FNA, PDB, Bolinder et al. 2016, GBIF	Ephedra sp.	0	0	0	0	0	0	0	0	0	0	0	0	0	0	0	0	0	0	0	0	0	0	0	1	1	1
Gnetales: Ephedraceae	Ephedra	NA Clade	Ephedra fasciculata A.Nelson	FNA, PDB, Bolinder et al. 2016, GBIF	Ephedra sp.	0	0	0	0	0	0	0	0	0	0	0	0	0	0	0	0	0	1	1	0	0	0	1	1	1	1
Gnetales: Ephedraceae	Ephedra	NA Clade	Ephedra nevadenisis S.Watson	FNA, PDB, Bolinder et al. 2016, GBIF	Ephedra sp.	0	0	0	0	0	0	0	0	0	0	0	0	0	0	0	0	0	1	1	0	1	0	1	1	1	1
Gnetales: Ephedraceae	Ephedra	NA Clade	Ephedra pendunculata Engelm. Ex Watson	FNA, PDB, Bolinder et al. 2016, GBIF	Ephedra sp.	0	0	0	0	0	0	0	0	0	0	0	1	1	0	0	0	0	0	0	0	0	0	1	1	1	1
Gnetales: Ephedraceae	Ephedra	NA Clade	Ephedra torreyana S.Watson	FNA, PDB, Bolinder et al. 2016, GBIF	Ephedra sp.	0	0	0	0	0	0	0	0	0	0	0	0	0	0	0	0	0	1	1	0	0	0	1	1	1	1
Gnetales: Ephedraceae	Ephedra	NA Clade	Ephedra trifurca Torrey ex S.Watson	FNA, PDB, Bolinder et al. 2016, GBIF	Ephedra sp.	0	0	0	0	0	0	0	0	0	0	0	0	0	0	0	0	0	1	1	0	0	0	1	1	1	1
Gnetales: Ephedraceae	Ephedra	NA Clade	Ephedra vidris	FNA, PDB, Bolinder et al. 2016, GBIF	Ephedra sp.	0	0	0	0	1	0	0	1	1	0	0	0	0	0	0	0	0	1	1	0	1	0	1	1	1	1
Gnetales: Ephedraceae	Ephedra	NA Clade	Epherdra compacta Rose	Bolinder et al. 2016, GBIF	Ephedra sp.	0	0	0	0	1	1	0	0	0	0	0	1	1	0	0	0	0	0	0	0	0	0	1	1	1	0
Gnetales: Ephedraceae	Ephedra	Asia Clade	Ephedra distachya L.	Fang et al. 2011, FOC, Bolinder et al. 2016, GBIF	Ephedra sp.	0	0	0	0	1	1	0	1	1	0	0	0	0	0	0	0	0	1	1	0	0	0	1	1	0	1
Gnetales: Ephedraceae	Ephedra	Asia Clade	Ephedra equisetina Bunge	Fang et al. 2011, FOC, Bolinder et al. 2016, GBIF	Ephedra sp.	0	0	0	0	1	0	0	1	1	1	0	1	1	0	0	0	1	0	0	0	0	0	0	1	0	1
Gnetales: Ephedraceae	Ephedra	Asia Clade	Ephedra fedtschenkoae Paulsen	Fang et al. 2011, FOC, Bolinder et al. 2016, GBIF	Ephedra sp.	0	0	0	0	0	0	0	0	1	1	0	0	0	0	0	0	1	0	0	0	0	0	0	1	0	1
Gnetales: Ephedraceae	Ephedra	Asia Clade	Ephedra gerardiana Wall. ex C. A. Mey.	Fang et al. 2011, FOC, Bolinder et al. 2016, GBIF	Ephedra sp.	0	0	0	0	0	0	0	0	1	1	0	0	0	0	1	1	1	0	0	0	0	0	0	1	0	1
Gnetales: Ephedraceae	Ephedra	Asia Clade	Ephedra intermedia Schrenk ex C. A. Mey.	Fang et al. 2011, FOC, Bolinder et al. 2016, GBIF	Ephedra sp.	0	0	0	0	0	0	0	0	0	0	0	0	0	1	1	1	1	1	1	0	1	1	0	1	1	1
Gnetales: Ephedraceae	Ephedra	Asia Clade	Ephedra likiangensis Florin	Fang et al. 2011, FOC, Bolinder et al. 2016, GBIF	Ephedra sp.	0	0	0	0	0	0	0	0	0	0	0	1	1	0	1	1	1	0	0	0	0	0	1	0	0	0
Gnetales: Ephedraceae	Ephedra	Asia Clade	Ephedra lomatolepis Schrenk	Fang et al. 2011, FOC, Bolinder et al. 2016, GBIF	Ephedra sp.	0	0	0	0	0	0	0	0	1	0	0	0	0	0	0	0	0	0	0	0	0	0	0	1	0	1
Gnetales: Ephedraceae	Ephedra	Asia Clade	Ephedra minuta Florin	Fang et al. 2011, FOC, Bolinder et al. 2016, GBIF	Ephedra sp.	0	0	0	0	0	0	0	0	0	0	0	0	1	0	1	1	1	0	0	0	0	0	1	1	0	0
Gnetales: Ephedraceae	Ephedra	Asia Clade	Ephedra monosperma Gemlin ex C. A. Mey.	Fang et al. 2011, FOC, Bolinder et al. 2016, GBIF	Ephedra sp.	0	0	0	0	0	0	0	1	1	1	0	0	0	1	1	1	1	0	0	0	0	0	0	1	0	1
Gnetales: Ephedraceae	Ephedra	Asia Clade	Ephedra przewalskii Stapf	Fang et al. 2011, FOC, Bolinder et al. 2016, GBIF	Ephedra sp.	0	0	0	0	0	0	0	1	1	1	0	0	0	0	1	1	1	0	0	0	0	0	0	1	0	1
Gnetales: Ephedraceae	Ephedra	Asia Clade	Ephedra regeliana Florin	Fang et al. 2011, FOC, Bolinder et al. 2016, GBIF	Ephedra sp.	0	0	0	0	0	0	0	1	1	1	0	0	0	0	0	0	0	0	0	0	0	0	0	1	0	1
Gnetales: Ephedraceae	Ephedra	Asia Clade	Ephedra rhytidosperma Pachom.	Fang et al. 2011, FOC, Bolinder et al. 2016, GBIF	Ephedra sp.	0	0	0	0	0	0	0	0	0	0	0	0	0	0	0	0	0	0	0	0	0	0	0	1	0	1
Gnetales: Ephedraceae	Ephedra	Asia Clade	Ephedra rituensis Y. Yang, D. Z. Fu et G. Zhu	Fang et al. 2011, FOC, Bolinder et al. 2016, GBIF	Ephedra sp.	0	0	0	0	0	0	0	0	0	0	0	0	0	0	0	0	1	0	0	0	0	0	0	1	0	1
Gnetales: Ephedraceae	Ephedra	Asia Clade	Ephedra saxatilis (Stapf) Royle ex Florin	Fang et al. 2011, FOC	Ephedra sp.	0	0	0	0	0	0	0	0	0	1	0	0	0	0	0	0	1	0	0	0	0	0	0	1	0	1
Gnetales: Ephedraceae	Ephedra	Asia Clade	Ephedra sinica Stapf	Fang et al. 2011, FOC, Bolinder et al. 2016, GBIF	Ephedra sp.	0	0	0	0	0	0	0	0	0	0	0	1	1	1	1	1	0	0	0	0	0	0	0	1	0	1
Gnetales: Ephedraceae	Ephedra	Asia Clade	Ephedra sarcocarpa Aitch. & Hemsl.	Bolinder et al. 2016, GBIF	Ephedra sp.	0	0	0	0	0	0	0	0	0	0	0	0	0	0	0	0	0	0	0	0	0	0	0	1	1	1
Gnetales: Ephedraceae	Ephedra	Asia Clade	Ephedra strobilaceae Bunge	Bolinder et al. 2016, GBIF	Ephedra sp.	0	0	0	0	0	0	0	0	0	0	0	0	0	0	0	0	0	1	1	0	0	0	1	1	1	1
Gnetales: Ephedraceae	Ephedra	Asia Clade	Ephedra transistoria Riedl	Bolinder et al. 2016, GBIF	Ephedra sp.	0	0	0	0	0	0	0	0	0	0	0	0	0	0	0	0	0	0	0	0	0	0	0	0	1	0
Gnetales: Ephedraceae	Ephedra	SA Clade	Ephedra americana	Bolinder et al. 2016, GBIF	Ephedra sp.	0	0	0	1	0	0	0	0	0	0	0	0	0	0	0	0	0	0	1	0	0	0	1	0	0	0
Gnetales: Ephedraceae	Ephedra	SA Clade	Ephedra boelckei F.A.Roig	Bolinder et al. 2016, GBIF	Ephedra sp.	0	0	0	0	0	0	0	0	0	0	0	0	0	0	0	0	0	0	0	0	0	0	0	0	1	1
Gnetales: Ephedraceae	Ephedra	SA Clade	Ephedra breana Phil.	Bolinder et al. 2016, GBIF	Ephedra sp.	0	0	0	0	1	0	0	0	0	0	0	1	1	0	0	0	0	0	1	0	0	0	1	0	1	1
Gnetales: Ephedraceae	Ephedra	SA Clade	Ephedra chilensis C.Presl	Bolinder et al. 2016, GBIF	Ephedra sp.	0	0	0	0	1	1	1	0	0	0	0	0	0	0	0	0	0	0	1	0	0	0	0	1	0	1
Gnetales: Ephedraceae	Ephedra	SA Clade	Ephedra frustillata Miers	Bolinder et al. 2016, GBIF	Ephedra sp.	0	0	0	0	0	1	1	0	0	0	0	0	0	0	0	0	0	0	1	0	0	0	0	1	0	0
Gnetales: Ephedraceae	Ephedra	SA Clade	Ephedra multiflora Phil. Ex Stapf	Bolinder et al. 2016, GBIF	Ephedra sp.	0	0	0	0	0	1	1	0	0	0	0	0	0	0	0	0	0	0	1	0	0	0	0	1	0	0
Gnetales: Ephedraceae	Ephedra	SA Clade	Ephedra ochreata Miers	Bolinder et al. 2016, GBIF	Ephedra sp.	0	0	0	0	1	1	1	0	0	0	0	0	0	0	0	0	0	0	1	0	0	0	0	1	0	1
Gnetales: Ephedraceae	Ephedra	SA Clade	Ephedra tweediana Tul.	Bolinder et al. 2016, GBIF	Ephedra sp.	0	0	0	0	0	0	0	0	0	0	0	1	1	0	0	0	0	0	1	0	0	0	1	1	1	0
Gnetales: Ephedraceae	Ephedra	SA Clade	Ephedra trifurcata Zöller	Bolinder et al. 2016, GBIF	Ephedra sp.	0	0	0	0	0	0	0	0	0	0	0	0	0	0	0	0	0	0	1	0	0	0	0	0	0	0
Gnetales: Ephedraceae	Ephedra	Med Clade	Ephedra triandra Tul.	Bolinder et al. 2016, GBIF	Ephedra sp.	0	0	0	0	1	1	0	0	0	0	0	1	1	0	0	0	0	0	1	0	0	0	1	1	0	1
Gnetales: Ephedraceae	Ephedra	Med Clade	Ephedra altissima Desf.	Bolinder et al. 2016, GBIF	Ephedra sp.	0	0	0	0	0	0	0	0	0	0	0	0	0	0	0	0	0	1	1	0	0	0	1	1	1	1
Gnetales: Ephedraceae	Ephedra	Med Clade	Ephedra aphylla Forssk.	Bolinder et al. 2016, GBIF, FOI	Ephedra sp.	0	0	0	0	0	0	0	0	0	0	0	0	0	0	0	0	0	1	1	0	0	0	1	1	0	1
Gnetales: Ephedraceae	Ephedra	Med Clade	Ephedra alata Decne.	Bolinder et al. 2016, GBIF, FOI	Ephedra sp.	0	0	0	0	0	0	0	0	0	0	0	0	0	0	0	0	0	1	0	0	0	0	1	1	1	1
Gnetales: Ephedraceae	Ephedra	Med Clade	Ephedra foliata Boiss. Ex C.A.Mey.(=E. ciliata Fisch. & C.A.Mey.)	FOI, FOP	Ephedra sp.	0	0	0	0	0	0	0	0	0	0	0	0	0	0	0	0	0	1	0	0	0	0	1	1	1	1
Gnetales: Ephedraceae	Ephedra	Med Clade	Ephedra foeminea Forssk.	Bolinder et al. 2016, GBIF, FOI	Ephedra sp.	0	0	0	0	0	0	0	0	0	0	0	0	0	0	0	0	0	1	1	0	0	0	1	1	1	0
Gnetales: Ephedraceae	Ephedra	Med Clade	Ephedra milleri Freitag & Maier-St.	Bolinder et al. 2016, GBIF	Ephedra sp.	0	0	0	0	0	0	0	0	0	0	0	0	0	0	0	0	0	0	0	0	0	0	0	0	1	0
Gnetales: Ephedraceae	Ephedra	Med Clade	Ephedra pachyclada Boiss.	Bolinder et al. 2016, GBIF, FOI	Ephedra sp.	0	0	0	0	0	0	0	0	0	0	0	0	0	0	0	0	0	1	0	0	0	0	1	1	1	1
GYM:Cupressaceae				Farjon 2005, GBIF	Cupressaceae np	1	1	1	1	1	1	1	1	1	1	0	1	1	1	1	1	1	1	1	1	1	1	1	1	1	1
GYM:Cupressaceae/Taxodioideae	Glyptostrobus		Glyptostrobus pensilis (Staunton ex D.Don) K.Koch	Farjon 2005, Fang et al. 2011, FOC, GBIF, TCW	Papillate Cupressaceae	0	1	0	1	1	1	0	0	0	0	0	1	1	0	0	0	0	0	0	0	0	0	0	0	0	0
GYM:Cupressaceae/Taxodioideae	Taxodium		Taxodium distichum (L.) Rich.	Farjon 2005, Thompson 1999 (a), GBIF, PDB	Papillate Cupressaceae	1	1	0	1	1	0	0	0	0	0	0	0	0	0	0	0	0	0	0	0	0	0	0	0	0	0
GYM:Cupressaceae/Taxodioideae	Taxodium		Taxodium mucronatum Ten.	Farjon 2005, Thompson 1999 (a), GBIF, PDB	Papillate Cupressaceae	1	1	1	1	1	1	0	0	0	0	0	1	1	0	0	0	0	0	0	0	0	0	1	0	0	0
GYM:Cupressaceae/Taxodioideae	Cryptomeria		Cryptomeria japonica D.Don	Farjon 2005, Fang et al. 2011, FOC, GBIF	Papillate Cupressaceae	0	0	0	0	1	1	1	0	1	0	0	0	0	0	0	0	0	0	0	0	0	0	0	0	0	0
GYM:Cupressaceae:Sequoioideae	Sequoiadendron		Sequoiadendron giganteum (Lindl.) J.Buchholz	Farjon 2005, Thompson 1999 (a), GBIF, PDB, TCW	Papillate Cupressaceae	0	0	0	0	1	0	0	0	0	0	0	0	0	0	0	0	0	1	1	0	0	1	0	0	0	0
GYM:Cupressaceae:Sequoioideae	Sequoia		Sequoia sempervirens (D.Don) Endl.	Farjon 2005, Thompson 1999 (a), GBIF, PDB, TCW	(Large) Papillate Cupressaceae	0	0	0	0	0	0	0	0	0	0	0	0	0	0	0	0	0	0	1	0	0	0	0	0	0	0
GYM:Cupressaceae:Sequoioideae	Metasequoia		Metasequoia glyptosroboides Hu & W.C.Cheng	Farjon 2005, Fang et al. 2011, FOC, GBIF, TCW	Papillate Cupressaceae	0	0	0	0	1	0	0	0	0	0	0	1	0	0	0	0	0	0	0	0	0	0	0	0	0	0
GYM:Pinaceae	Cathaya		Cathaya argyrophylla Chun & Kuang	Farjon 1990, Fang et al. 2011, FOC, GBIF, TCW	Cathaya sp.	0	0	0	0	1	1	0	0	0	0	0	0	0	0	0	0	0	0	0	0	0	0	0	0
GYM:Pinaceae	Cedrus		Cedrus libani A.Rich.	Farjon 1990, GBIF, TCW	Cedrus sp.	0	0	0	0	0	0	0	0	0	0	0	0	0	0	0	0	0	1	1	0	1	0	0	0	0	0
GYM:Pinaceae	Cedrus		Cedrus atlantica (Endl.) Manetti ex Carrière	Farjon 1990, GBIF, TCW	Cedrus sp.	0	0	0	0	1	0	0	0	0	0	0	0	0	0	0	0	0	1	1	0	0	0	1	1	0	0
GYM:Pinaceae	Cedrus		Cedrus brevifolia (Hook.) Henry	Farjon 1990, GBIF, TCW	Cedrus sp.	0	0	0	0	0	0	0	0	0	0	0	0	0	0	0	0	0	1	1	0	0	0	0	0	0	0
GYM:Pinaceae	Cedrus		Cedrus deodara (Roxb.) G.Don in Loud.	Farjon 1990, Fang et al. 2011, FOC, GBIF	Cedrus sp.	0	0	0	0	1	1	0	0	1	1	0	1	1	0	0	1	0	1	1	0	0	0	0	0	0	0
GYM:Pinaceae	Pinus	Strobus (sect. Strobus)	Pinus strobus L. + P. strobus var. Chiapensis Martínez	Farjon 2005, Thompson 1999 (a), GBIF, PDB	Haploxylon type	0	0	0	0	1	1	0	1	1	1	0	1	1	0	0	0	0	0	0	0	0	0	0	0	0	0
GYM:Pinaceae	Pinus	Strobus (sect. Strobus)	Pinus lambertiana Douglas	Farjon 2005, Thompson 1999 (a), GBIF, PDB	Haploxylon type	0	0	0	0	0	0	0	0	0	0	0	0	0	0	0	0	0	1	1	0	0	1	0	0	0	0
GYM:Pinaceae	Pinus	Strobus (sect. Strobus)	Pinus monticola Douglas ex D.Don	Farjon 2005, Thompson 1999 (a), GBIF, PDB	Haploxylon type	0	0	0	0	0	1	1	0	1	1	0	0	0	0	0	0	1	0	1	0	1	1	0	0	0	0
GYM:Pinaceae	Pinus	Strobus (sect. Strobus)	Pinus albicaulis Engelm.	Farjon 2005, Thompson 1999 (a), GBIF, PDB	Haploxylon type	0	0	0	0	0	1	0	1	1	1	0	0	0	0	0	0	1	0	1	0	1	1	0	1	0	0
GYM:Pinaceae	Pinus	Strobus (sect. Strobus)	Pinus strobiformis Engelm.	Farjon 2005, Thompson 1999 (a), GBIF, PDB	Haploxylon type	0	0	0	0	0	1	0	0	1	1	0	1	1	0	0	0	0	1	1	0	0	0	1	1	1	0
GYM:Pinaceae	Pinus	Strobus (sect. Strobus)	Pinus flexilis E.James	Farjon 2005, Thompson 1999 (a), GBIF, PDB	Haploxylon type	0	0	0	0	0	1	0	0	1	1	0	0	0	0	0	0	1	1	1	0	1	1	0	1	0	0
GYM:Pinaceae	Pinus	Strobus (sect. Strobus)	Pinus armandii Franch. + P. armandii mastersiana (Hayata) Hayata	Farjon 2005, Fang et al. 2011, FOC, GBIF	Haploxylon type	0	0	0	0	1	1	0	0	0	0	0	1	1	1	1	1	0	0	0	0	0	0	0	1	0	0
GYM:Pinaceae	Pinus	Strobus (sect. Strobus)	Pinus bhutanica Grieson et al.	Farjon 2005, GBIF	Haploxylon type	0	0	0	0	0	0	0	0	0	0	0	0	1	0	1	1	0	0	0	0	0	0	0	1	0	0
GYM:Pinaceae	Pinus	Strobus (sect. Strobus)	Pinus wallichiana A.B.Jacks.	Farjon 2005, Fang et al. 2011, FOC,FOP, GBIF	Haploxylon type	0	0	0	0	1	1	0	0	1	1	0	1	1	0	1	1	1	0	0	1	1	0	0	0	0	0
GYM:Pinaceae	Pinus	Strobus (sect. Strobus)	Pinus fenzeliana Hand.-Mazz. + Pinus Kwangtungensis Chun & Tsiang	Farjon 2005, Fang et al. 2011, FOC, GBIF	Haploxylon type	0	1	0	1	1	0	0	0	0	0	0	1	0	0	0	0	0	0	0	0	0	0	0	0	0	0
GYM:Pinaceae	Pinus	Strobus (sect. Strobus)	Pinus koraiensis Sieb. & Zucc.	Farjon 2005, Fang et al. 2011, FOC, FOJ, GBIF	Haploxylon type	0	0	0	0	1	0	0	0	1	0	0	1	0	1	1	1	0	0	0	0	0	0	0	0	0	0
GYM:Pinaceae	Pinus	Strobus (sect. Strobus)	Pinus morrisonicola Hayata	Farjon 2005, Fang et al. 2011, FOC, GBIF	Haploxylon type	0	0	0	1	1	1	0	0	0	0	0	1	1	0	0	0	0	0	0	0	0	0	0	0	0	0
GYM:Pinaceae	Pinus	Strobus (sect. Strobus)	Pinus pumila (Pall.) Regel	Farjon 2005, GBIF	Haploxylon type	0	0	0	0	1	1	0	0	1	1	0	0	0	1	1	1	1	0	0	0	0	1	0	0	0	0
GYM:Pinaceae	Pinus	Strobus (sect. Strobus)	Pinus sibirica Du Tour	Farjon 2005, Fang et al. 2011, FOC, GBIF	Haploxylon type	0	0	0	0	0	0	0	0	1	1	0	0	0	0	1	1	1	0	0	0	0	0	0	1	0	0
GYM:Pinaceae	Pinus	Strobus (sect. Strobus)	Pinus ayacahuite Ehrenb. Ex Schltdl.	Farjon 2005, Thompson 1999 (a), GBIF	Haploxylon type	0	0	0	1	1	1	0	0	0	0	0	1	1	0	0	0	0	0	0	0	0	0	0	1	0	0
GYM:Pinaceae	Pinus	Strobus (sect. Strobus)	Pinus cembra L.	Farjon 2005, GBIF	Haploxylon type	0	0	0	0	0	1	0	0	1	1	0	0	0	0	0	0	1	0	0	0	0	0	0	0	0	0
GYM:Pinaceae	Pinus	Strobus (sect. Strobus)	Pinus dalatensis Ferré	Farjon 2005, GBIF	Haploxylon type	0	0	0	1	1	0	0	0	0	0	0	1	0	0	0	0	0	0	0	0	0	0	0	0	0	0
GYM:Pinaceae	Pinus	Strobus (sect. Strobus)	Pinus parvifolia Sieb. & Zucc.	Farjon 2005, GBIF, FOJ	Haploxylon type	0	0	0	0	1	1	0	0	1	1	0	0	0	0	0	0	0	0	0	0	0	0	0	0	0	0
GYM:Pinaceae	Pinus	Strobus (sect. Strobus)	Pinus peuce Griseb.	Farjon 2005, GBIF	Haploxylon type	0	0	0	0	1	1	0	0	1	1	0	0	0	0	0	0	0	0	1	0	0	0	0	0	0	0
GYM:Pinaceae	Pinus	Strobus (sect. Gerardiana)	Pinus bungeana Zucc. ex Endl.	Farjon 2005, Fang et al. 2011, FOC, GBIF	Haploxylon type	0	0	0	0	0	0	0	0	0	0	0	1	1	1	1	1	0	0	0	0	0	0	0	1	0	0
GYM:Pinaceae	Pinus	Strobus (sect. Gerardiana)	Pinus squamata X.W.Li	Fang et al. 2011, FOC	Haploxylon type	0	0	0	0	0	0	0	0	0	0	0	1	1	0	0	0	0	0	0	0	0	0	0	0	0	0
GYM:Pinaceae	Pinus	Strobus (sect. Gerardiana)	Pinus gerardiana Wall. ex. D.Don	Farjon 2005, Fang et al. 2011, FOC,FOP, GBIF	Haploxylon type	0	0	0	0	1	1	0	0	1	1	0	1	1	0	0	0	1	0	0	0	1	1	0	1	0	0
GYM:Pinaceae	Pinus	Strobus (sect. Krempfii)	Pinus krempfii Lecomte	Farjon 2005, GBIF	Haploxylon type	0	1	0	1	0	0	0	0	0	0	0	0	1	0	0	0	0	0	0	0	0	0	0	0	0	0
GYM:Pinaceae	Pinus	Strobus (sect. Cembroides)	Pinus monophylla Torr. & Frém.	Farjon 2005, Thompson 1999 (a), GBIF, PDB	Haploxylon type	0	0	0	0	0	0	0	0	0	0	0	0	0	0	0	0	0	1	1	0	0	1	0	1	0	0
GYM:Pinaceae	Pinus	Strobus (sect. Cembroides)	Pinus quadrifolia (Parl. ex Sudw.) Silba	Farjon 2005, Thompson 1999 (a), GBIF, PDB	Haploxylon type	0	0	0	0	0	0	0	0	0	0	0	0	0	0	0	0	0	1	1	0	0	0	0	0	0	0
GYM:Pinaceae	Pinus	Strobus (sect. Cembroides)	Pinus edulis Engelm.	Farjon 2005, Thompson 1999 (a), GBIF, PDB	Haploxylon type	0	0	0	0	0	1	0	0	1	1	0	0	0	0	0	0	0	1	1	0	1	0	0	1	0	0
GYM:Pinaceae	Pinus	Strobus (sect. Cembroides)	Pinus cembroides Zucc.	Farjon 2005, Thompson 1999 (a), GBIF, PDB	Haploxylon type	0	0	0	0	1	1	0	0	0	0	0	1	1	0	0	0	0	0	1	0	0	0	1	1	1	0
GYM:Pinaceae	Pinus	Strobus (sect. Cembroides)	Pinus culminicola Andresen & Beaman	Farjon 2005, GBIF	Haploxylon type	0	0	0	0	1	1	0	0	0	0	0	0	0	0	0	0	0	0	0	0	0	0	0	1	0	0
GYM:Pinaceae	Pinus	Strobus (sect. Cembroides)	Pinus rzedowskii Madrigal & M.Caball.	Farjon 2005, GBIF	Haploxylon type	0	0	1	0	0	0	0	0	0	0	0	0	0	0	0	0	0	0	1	0	0	0	0	0	0	0
GYM:Pinaceae	Pinus	Strobus (sect. Cembroides)	Pinus maximartinezii Rzed.	Farjon 2005, GBIF	Haploxylon type	0	0	0	0	0	0	0	0	0	0	0	1	1	0	0	0	0	0	0	0	0	0	0	0	0	0
GYM:Pinaceae	Pinus	Strobus (sect. Cembroides)	Pinus pinceana Gordon	Farjon 2005, Thompson 1999 (a), GBIF	Haploxylon type	0	0	0	0	1	1	0	0	0	0	0	1	1	0	0	0	0	0	0	0	0	0	1	1	1	0
GYM:Pinaceae	Pinus	Strobus (sect. Balfourianae)	Pinus aristata Engelm.	Farjon 2005, Thompson 1999 (a), GBIF, PDB	Haploxylon type	0	0	0	0	0	1	0	0	1	1	0	0	0	0	0	0	1	0	1	0	1	0	0	0	0	0
GYM:Pinaceae	Pinus	Strobus (sect. Balfourianae)	Pinus longaeva D.K.Bailey	Farjon 2005, Thompson 1999 (a), GBIF, PDB	Haploxylon type	0	0	0	0	1	0	0	0	1	1	0	0	0	0	0	0	1	0	1	0	1	1	0	0	0	0
GYM:Pinaceae	Pinus	Strobus (sect. Balfourianae)	Pinus balfouriana Balf.	Farjon 2005, Thompson 1999 (a), GBIF, PDB	Haploxylon type	0	0	0	0	1	0	0	0	0	0	0	0	0	0	0	0	0	0	1	0	0	1	0	0	0	0
GYM:Pinaceae	Pinus	Strobus (sect. Nelsoniae)	Pinus nelsonii Shaw	Farjon 2005, GBIF	Haploxylon type	0	0	0	0	1	1	0	0	0	0	0	1	0	0	0	0	0	0	0	0	0	0	0	1	1	0
GYM:Pinaceae	Pinus	Pinus (sect. Pinaster)	Pinus heldreichii H.Christ	Farjon 2005, Critchfield & Little 1966, GBIF	Diploxylon type	0	0	0	0	0	1	0	0	1	1	0	0	0	0	0	0	0	1	1	0	0	0	0	0	0	0
GYM:Pinaceae	Pinus	Pinus (sect. Pinaster)	Pinus brutia Ten.	Farjon 2005, Caudullo et al. 2017, GBIF	Diploxylon type	0	0	0	0	1	1	0	0	0	0	0	0	0	0	0	0	0	1	1	0	0	0	0	0	0	0
GYM:Pinaceae	Pinus	Pinus (sect. Pinaster)	Pinus halepensis Mill.	Farjon 2005, Caudullo et al. 2017, GBIF	Diploxylon type	0	0	0	0	1	1	0	0	0	0	0	0	0	0	0	0	0	1	1	0	0	0	0	1	0	0
GYM:Pinaceae	Pinus	Pinus (sect. Pinaster)	Pinus pinea L.	Farjon 2005, Caudullo et al. 2017, GBIF	Diploxylon type	0	0	0	0	0	0	0	0	0	0	0	0	0	0	0	0	0	1	1	0	0	0	0	0	0	0
GYM:Pinaceae	Pinus	Pinus (sect. Pinaster)	Pinus canarensis C.Sm.	Farjon 2005, GBIF	Diploxylon type	0	0	0	0	0	0	0	0	0	0	0	0	0	0	0	0	0	1	1	0	0	0	1	1	0	0
GYM:Pinaceae	Pinus	Pinus (sect. Pinaster)	Pinus roxburghii Sarg.	Farjon 2005, Fang et al. 2011, FOC, FOP	Diploxylon type	0	0	0	0	1	1	0	0	1	1	0	1	1	0	0	0	0	0	0	0	1	1	0	0	0	0
GYM:Pinaceae	Pinus	Pinus (sect. Pinaster)	Pinus latteri Manson	Farjon 2005, Fang et al. 2011, FOC, GBIF	Diploxylon type	0	1	0	1	0	0	0	0	0	0	0	1	0	0	0	0	0	0	0	0	0	0	0	0	0	0
GYM:Pinaceae	Pinus	Pinus (sect. Pinaster)	Pinus merkusii Jungh. & de Vriese	Farjon 2005, GBIF	Diploxylon type	1	1	0	1	0	0	0	0	0	0	0	0	0	0	0	0	0	0	0	0	0	0	0	0	0	0
GYM:Pinaceae	Pinus	Pinus (sect. Australes)	Pinus greggii Engelm. ex Parl.	Farjon 2005, Thompson 1999 (a), GBIF, PDB	Diploxylon type	0	0	0	0	1	1	0	0	0	0	0	1	1	0	0	0	0	0	0	0	0	0	1	1	0	0
GYM:Pinaceae	Pinus	Pinus (sect. Australes)	Pinus glabra Walt.	Farjon 2005, Thompson 1999 (a), GBIF, PDB	Diploxylon type	0	0	0	0	1	0	0	0	0	0	0	0	0	0	0	0	0	0	0	0	0	0	0	0	0	0
GYM:Pinaceae	Pinus	Pinus (sect. Australes)	Pinus muricata D.Don	Farjon 2005, Thompson 1999 (a), GBIF, PDB	Diploxylon type	0	0	0	0	0	0	0	0	0	0	0	0	0	0	0	0	0	0	1	0	0	0	0	0	0	0
GYM:Pinaceae	Pinus	Pinus (sect. Australes)	Pinus elliottii Engelm. + P. elliottii var. Densa Little & Dorman	Farjon 2005, Thompson 1999 (a), GBIF, PDB	Diploxylon type	1	1	0	1	1	0	0	0	0	0	0	0	0	0	0	0	0	0	0	0	0	0	0	0	0	0
GYM:Pinaceae	Pinus	Pinus (sect. Australes)	Pinus taeda L.	Farjon 2005, GBIF	Diploxylon type	0	0	0	0	1	0	0	0	0	0	0	0	0	0	0	0	0	0	0	0	0	0	0	0	0	0
GYM:Pinaceae	Pinus	Pinus (sect. Australes)	Pinus pungens lamb.	Farjon 2005, Thompson 1999 (a), GBIF, PDB	Diploxylon type	0	0	0	0	1	1	0	0	0	0	0	0	0	0	0	0	0	0	0	0	0	0	0	0	0	0
GYM:Pinaceae	Pinus	Pinus (sect. Australes)	Pinus caribaea Morlet	Farjon 2005, Thompson 1999 (a), GBIF, PDB	Diploxylon type	1	1	1	1	0	0	0	0	0	0	0	0	0	0	0	0	0	0	0	0	0	0	0	0	0	0
GYM:Pinaceae	Pinus	Pinus (sect. Australes)	Pinus echinata Mill.	Farjon 2005, Thompson 1999 (a), GBIF, PDB	Diploxylon type	0	0	0	0	1	1	0	0	0	0	0	0	0	0	0	0	0	0	0	0	0	0	0	0	0	0
GYM:Pinaceae	Pinus	Pinus (sect. Australes)	Pinus rigida Mill.	Farjon 2005, Thompson 1999 (a), GBIF, PDB	Diploxylon type	0	0	0	0	1	1	0	1	1	0	0	0	0	0	0	0	0	0	0	0	0	0	0	0	0	0
GYM:Pinaceae	Pinus	Pinus (sect. Australes)	Pinus palustris Mill.	Farjon 2005, Thompson 1999 (a), GBIF, PDB	Diploxylon type	0	0	0	0	1	0	0	0	0	0	0	0	0	0	0	0	0	0	0	0	0	0	0	0	0	0
GYM:Pinaceae	Pinus	Pinus (sect. Australes)	Pinus serotina Michx.	Farjon 2005, Thompson 1999 (a), GBIF, PDB	Diploxylon type	0	0	0	0	1	0	0	0	0	0	0	0	0	0	0	0	0	0	0	0	0	0	0	0	0	0
GYM:Pinaceae	Pinus	Pinus (sect. Australes)	Pinus leiophylla Scheide ex Schltdl. & Cham. + P. leiophylla chihuahuana (Engelm.) G.R.Shaw	Farjon 2005, Thompson 1999 (a), GBIF, PDB	Diploxylon type	0	0	1	1	1	1	0	0	0	0	0	1	1	0	0	0	0	0	0	0	0	0	1	1	0	0
GYM:Pinaceae	Pinus	Pinus (sect. Australes)	Pinus attenuata Lemmon	Farjon 2005, Thompson 1999 (a), GBIF, PDB	Diploxylon type	0	0	0	0	0	0	0	0	0	0	0	0	0	0	0	0	0	1	1	0	0	0	0	0	0	0
GYM:Pinaceae	Pinus	Pinus (sect. Australes)	Pinus radiata D.Don	Farjon 2005, Thompson 1999 (a), GBIF, PDB	Diploxylon type	0	0	0	0	0	0	0	0	0	0	0	0	0	0	0	0	0	0	1	0	0	0	0	0	0	0
GYM:Pinaceae	Pinus	Pinus (sect. Australes)	Pinus herrerae Martiínez	Farjon 2005, GBIF	Diploxylon type	0	0	1	1	0	0	0	0	0	0	0	1	1	0	0	0	0	0	0	0	0	0	1	1	0	0
GYM:Pinaceae	Pinus	Pinus (sect. Australes)	Pinus lawsonii Roezl ex Gordon	Farjon 2005, Thompson 1999 (a), GBIF	Diploxylon type	0	0	1	1	1	1	0	0	0	0	0	1	1	0	0	0	0	0	0	0	0	0	0	0	0	0
GYM:Pinaceae	Pinus	Pinus (sect. Australes)	Pinus lumholtzii B.L.Rob. & Fernald	Farjon 2005, Thompson 1999 (a), GBIF	Diploxylon type	0	0	0	0	0	0	0	0	0	0	0	1	1	0	0	0	0	0	0	0	0	0	1	1	0	0
GYM:Pinaceae	Pinus	Pinus (sect. Australes)	Pinus occidentalis Sw.	Farjon 2005, GBIF	Diploxylon type	1	1	0	1	0	1	0	0	0	0	0	0	0	0	0	0	0	0	0	0	0	0	0	0	0	0
GYM:Pinaceae	Pinus	Pinus (sect. Australes)	Pinus oocarpa Schiede ex Schltdl.	Farjon 2005, GBIF	Diploxylon type	0	1	1	1	1	1	0	0	0	0	0	1	1	0	0	0	0	0	0	0	0	0	1	1	0	0
GYM:Pinaceae	Pinus	Pinus (sect. Australes)	Pinus patula Schiede ex Schltdl. & Cham.	Farjon 2005, Thompson 1999 (a), GBIF	Diploxylon type	0	1	1	0	1	1	0	0	0	0	0	1	1	0	0	0	0	0	0	0	0	0	0	1	0	0
GYM:Pinaceae	Pinus	Pinus (sect. Australes)	Pinus pinaster Aiton	Farjon 2005, Caudullo et al. 2017, GBIF	Diploxylon type	0	0	0	0	1	1	0	0	0	0	0	0	0	0	0	0	0	1	1	0	0	0	0	0	0	0
GYM:Pinaceae	Pinus	Pinus (sect. Australes)	Pinus pringlei Shaw	Farjon 2005, Thompson 1999 (a), GBIF	Diploxylon type	0	0	1	1	0	0	0	0	0	0	0	1	1	0	0	0	0	0	0	0	0	0	0	0	0	0
GYM:Pinaceae	Pinus	Pinus (sect. Australes)	Pinus tecunumanii Eguiluz & J.P.Perry	Farjon 2005, GBIF	Diploxylon type	0	1	1	1	0	1	0	0	0	0	0	0	1	0	0	0	0	0	0	0	0	0	0	1	0	0
GYM:Pinaceae	Pinus	Pinus (sect. Australes)	Pinus teocote Schiede ex Schltdl. & Chamb	Farjon 2005, GBIF	Diploxylon type	0	0	0	1	1	1	0	0	0	0	0	1	1	0	0	0	0	0	0	0	0	0	1	1	0	0
GYM:Pinaceae	Pinus	Pinus (sect. Ponderosae)	Pinus durangensis Martinéz	Farjon 2005, Thompson 1999 (a), GBIF	Diploxylon type	0	0	0	0	0	0	0	0	0	0	0	1	1	0	0	0	0	0	0	0	0	0	1	1	0	0
GYM:Pinaceae	Pinus	Pinus (sect. Ponderosae)	Pinus maximinoi H.E.Moore	Farjon 2005, GBIF	Diploxylon type	0	1	1	1	1	1	0	0	0	0	0	1	1	0	0	0	0	0	0	0	0	0	1	1	0	0
GYM:Pinaceae	Pinus	Pinus (sect. Ponderosae)	Pinus douglasiana Martínez	Farjon 2005, Thompson 1999 (a), GBIF, PDB	Diploxylon type	0	0	1	1	0	0	0	0	0	0	0	1	1	0	0	0	0	0	0	0	0	0	1	1	0	0
GYM:Pinaceae	Pinus	Pinus (sect. Ponderosae)	Pinus pseudostrobus Lindl.	Farjon 2005, Thompson 1999 (a), GBIF	Diploxylon type	0	0	1	1	1	1	0	0	0	0	0	1	1	0	0	0	0	0	0	0	0	0	1	1	0	0
GYM:Pinaceae	Pinus	Pinus (sect. Ponderosae)	Pinus devoniana Lindl.	Farjon 2005, GBIF	Diploxylon type	0	0	0	1	1	1	0	0	0	0	0	1	1	0	0	0	0	0	0	0	0	0	1	1	0	0
GYM:Pinaceae	Pinus	Pinus (sect. Ponderosae)	Pinus montezumae Lamb.	Farjon 2005, GBIF	Diploxylon type	0	1	1	1	1	1	0	0	0	0	0	1	1	0	0	0	0	0	0	0	0	0	1	1	1	0
GYM:Pinaceae	Pinus	Pinus (sect. Ponderosae)	Pinus hartwegii Lindl.	Farjon 2005, Thompson 1999 (a), GBIF	Diploxylon type	0	0	0	1	1	1	0	0	0	0	0	1	1	0	0	0	0	0	0	0	0	0	1	1	0	0
GYM:Pinaceae	Pinus	Pinus (sect. Ponderosae)	Pinus torreyana Parry ex Carrière	Farjon 2005, Thompson 1999 (a), GBIF, PDB	Diploxylon type	0	0	0	0	0	0	0	0	0	0	0	0	0	0	0	0	0	0	1	0	0	0	0	0	0	0
GYM:Pinaceae	Pinus	Pinus (sect. Ponderosae)	Pinus sabineana Douglas ex D.Don	Farjon 2005, Thompson 1999 (a), GBIF, PDB	Diploxylon type	0	0	0	0	0	0	0	0	0	0	0	0	0	0	0	0	0	1	1	0	0	0	0	0	0	0
GYM:Pinaceae	Pinus	Pinus (sect. Ponderosae)	Pinus coulteri D.Don	Farjon 2005, Thompson 1999 (a), GBIF, PDB	Diploxylon type	0	0	0	0	0	0	0	0	0	0	0	0	0	0	0	0	0	1	1	0	0	0	0	1	0	0
GYM:Pinaceae	Pinus	Pinus (sect. Ponderosae)	Pinus engelmannii Carrière	Farjon 2005, Thompson 1999 (a), GBIF, PDB	Diploxylon type	0	0	0	0	0	0	0	0	0	0	0	1	1	0	0	0	0	0	0	0	0	0	1	1	0	0
GYM:Pinaceae	Pinus	Pinus (sect. Ponderosae)	Pinus arizonica Engelm.	Farjon 2005, Thompson 1999 (a), GBIF, PDB	Diploxylon type	0	0	0	0	1	1	0	0	0	0	0	1	1	0	0	0	0	0	0	0	0	0	1	1	1	0
GYM:Pinaceae	Pinus	Pinus (sect. Ponderosae)	Pinus jeffreyi Balf.	Farjon 2005, Thompson 1999 (a), GBIF, PDB	Diploxylon type	0	0	0	0	1	0	0	0	0	0	0	0	0	0	0	0	0	1	1	0	0	1	0	0	0	0
GYM:Pinaceae	Pinus	Pinus (sect. Ponderosae)	Pinus ponderosa Douglas ex C.Lawson + P. ponderosa var. Scopulorum Engelm.	Farjon 2005, Thompson 1999 (a), GBIF, PDB	Diploxylon type	0	0	0	0	0	1	0	0	1	1	0	1	1	0	0	0	1	1	1	0	1	1	1	1	0	0
GYM:Pinaceae	Pinus	Pinus (sect. Contortae)	Pinus banksiana Lamb.	Farjon 2005, Thompson 1999 (a), GBIF, PDB	Diploxylon type	0	0	0	0	1	0	0	1	1	1	0	0	0	0	1	0	0	0	0	0	0	1	0	0	0	0
GYM:Pinaceae	Pinus	Pinus (sect. Contortae)	Pinus contorta Dougl. ex Loudon+ P. contorta var. latifolia Engelm. + P. contorta var. Murrayana (Balf.) Engelm.	Farjon 2005, Thompson 1999 (a), GBIF, PDB	Diploxylon type	0	0	0	0	1	1	1	1	1	1	0	0	0	0	0	0	1	1	1	0	1	1	0	0	0	0
GYM:Pinaceae	Pinus	Pinus (sect. Contortae)	Pinus virginiana Mill.	Farjon 2005, Thompson 1999 (a), GBIF, PDB	Diploxylon type	0	0	0	0	1	1	0	0	0	0	0	0	0	0	0	0	0	0	0	0	0	0	0	0	0	0
GYM:Pinaceae	Pinus	Pinus (sect. Contortae)	Pinus clausa (Champ. ex Engelm.) Sarg.	Farjon 2005, Thompson 1999 (a), GBIF, PDB	Diploxylon type	1	1	0	1	1	0	0	0	0	0	0	0	0	0	0	0	0	0	0	0	0	0	0	0	0	0
GYM:Pinaceae	Pinus	Pinus (sect. Sylvestres)	Pinus nigra J.F.Arnold	Farjon 2005, Caudullo et al. 2017, GBIF	Diploxylon type	0	0	0	0	1	1	0	0	1	1	0	0	0	0	0	0	0	1	1	0	1	0	0	0	0	0
GYM:Pinaceae	Pinus	Pinus (sect. Sylvestres)	Pinus tropicalis Morlet	Farjon 2005, GBIF	Diploxylon type	0	1	0	1	0	0	0	0	0	0	0	0	0	0	0	0	0	0	0	0	0	0	0	0	0	0
GYM:Pinaceae	Pinus	Pinus (sect. Sylvestres)	Pinus massoniana Lamb. + P. massoniana var. Morrisonicola Hayata	Farjon 2005, Fang et al. 2011, FOC, GBIF	Diploxylon type	0	0	0	1	1	1	0	0	0	0	0	1	1	0	0	1	1	0	0	0	0	0	0	0	0	0
GYM:Pinaceae	Pinus	Pinus (sect. Sylvestres)	Pinus uncinata Ramond ex DC.	Farjon 2005, GBIF	Diploxylon type	0	0	0	0	1	1	0	0	1	1	0	0	0	0	0	0	0	0	0	0	0	0	0	0	0	0
GYM:Pinaceae	Pinus	Pinus (sect. Sylvestres)	Pinus sylvestris L.	Farjon 2005, Caudullo et al. 2017, GBIF	Diploxylon type	0	0	0	0	1	1	0	0	1	1	0	0	0	0	1	1	1	1	1	0	1	1	0	0	0	0
GYM:Pinaceae	Pinus	Pinus (sect. Sylvestres)	Pinus densata Mast.	Farjon 2005, Fang et al. 2011, FOC, GBIF	Diploxylon type	0	0	0	0	0	0	0	0	0	0	0	0	1	0	1	1	1	0	0	0	0	0	0	0	0	0
GYM:Pinaceae	Pinus	Pinus (sect. Sylvestres)	Pinus yunnanensis Franch.	Farjon 2005, Fang et al. 2011, FOC, GBIF	Diploxylon type	0	0	0	0	0	0	0	0	0	0	0	1	1	0	1	1	1	0	0	0	0	0	0	0	0	0
GYM:Pinaceae	Pinus	Pinus (sect. Sylvestres)	Pinus kesiya Royle ex Gordon	Farjon 2005, Fang et al. 2011, FOC, GBIF	Diploxylon type	1	1	0	1	0	1	0	0	0	0	0	1	1	0	0	0	0	0	0	0	0	0	0	0	0	0
GYM:Pinaceae	Pinus	Pinus (sect. Sylvestres)	Pinus thunbergii Parl.	Farjon 2005, FOJ, GBIF	Diploxylon type	0	0	0	0	1	0	0	0	1	0	0	1	0	1	0	0	0	0	0	0	0	0	0	0	0	0
GYM:Pinaceae	Pinus	Pinus (sect. Sylvestres)	Pinus tabuliformis Carrière	Farjon 2005, Fang et al. 2011, FOC, GBIF	Diploxylon type	0	0	0	0	1	1	0	0	0	0	0	1	1	1	1	1	0	0	0	0	0	0	0	1	0	0
GYM:Pinaceae	Pinus	Pinus (sect. Sylvestres)	Pinus luchuensis Mayr	Farjon 2005, Fang et al. 2011, FOC, FOJ, GBIF	Diploxylon type	0	0	0	0	1	0	0	0	0	0	0	0	0	0	0	0	0	0	0	0	0	0	0	0	0	0
GYM:Pinaceae	Pinus	Pinus (sect. Sylvestres)	Pinus taiwanensis Hayata	Farjon 2005, Fang et al. 2011, FOC, GBIF	Diploxylon type	0	0	0	0	1	1	1	0	0	0	0	1	0	0	0	0	0	0	0	0	0	0	0	0	0	0
GYM:Pinaceae	Pinus	Pinus (sect. Sylvestres)	Pinus densiflora Sieb. & Zucc. + P. densiflora var. Ussuriensis Liou & Z.Wang	Farjon 2005, Fang et al. 2011, FOC, FOJ, GBIF	Diploxylon type	0	0	0	0	1	1	0	1	1	1	0	1	0	1	1	1	0	0	0	0	0	0	0	0	0	0
GYM:Pinaceae	Pinus	Pinus (sect. Sylvestres)	Pinus resinosa Aiton	Farjon 2005, Thompson 1999 (a), GBIF, PDB	Diploxylon type	0	0	0	0	1	1	0	1	1	0	0	0	0	0	0	0	0	0	0	0	0	0	0	0	0	0
GYM:Pinaceae	Pinus	Pinus (sect. Sylvestres)	Pinus mugo Turra	Farjon 2005, Caudullo et al. 2017, GBIF	Diploxylon type	0	0	0	0	0	1	1	0	1	1	0	0	0	0	0	0	1	0	0	0	0	0	0	0	0	0
GYM:Pinaceae	Picea	Picea (sect. Abies)	Picea abies (L.) Karst.	Farjon 1990, Caudullo et al 2017, GBIF	Picea sp.	0	0	0	0	1	1	0	0	1	1	0	0	0	0	0	0	0	0	0	0	0	0	0	0	0	0
GYM:Pinaceae	Picea	Picea (sect. Abies)	Picea asperata Mast.	Farjon 1990, Fang et al. 2011, FOC, GBIF	Picea sp.	0	0	0	0	0	0	0	0	0	0	0	0	1	0	1	1	1	0	0	0	0	0	0	1	0	0
GYM:Pinaceae	Picea	Picea (sect. Abies)	Picea koraiensis Nakai	Farjon 1990, Fang et al. 2011, FOC, GBIF	Picea sp.	0	0	0	0	0	0	0	0	1	0	0	0	0	1	1	1	0	0	0	0	0	0	0	0	0	0
GYM:Pinaceae	Picea	Picea (sect. Abies)	Picea koyamai Shirasawa	Farjon 1990, FOJ, GBIF	Picea sp.	0	0	0	0	0	0	0	0	1	0	0	0	0	0	0	0	0	0	0	0	0	0	0	0	0	0
GYM:Pinaceae	Picea	Picea (sect. Abies)	Picea obovata Ledeb.	Farjon 1990, Fang et al. 2011, FOC, GBIF	Picea sp.	0	0	0	0	0	0	0	0	1	1	0	0	0	0	1	1	1	0	0	0	0	0	0	0	0	0
GYM:Pinaceae	Picea	Picea (sect. Abies)	Picea aurantiaca Mast.	Farjon 1990, Fang et al. 2011, FOC, GBIF	Picea sp.	0	0	0	0	0	0	0	0	0	0	0	0	1	0	1	1	1	0	0	0	0	0	0	1	0	0
GYM:Pinaceae	Picea	Picea (sect. Abies)	Picea retroflexa Mast.	Farjon 1990, Fang et al. 2011, FOC, GBIF	Picea sp.	0	0	0	0	0	0	0	0	0	0	0	0	1	0	1	1	1	0	0	0	0	0	0	1	0	0
GYM:Pinaceae	Picea	Picea (sect. Abies)	Picea chihuahuana Martinez	Farjon 1990, GBIF	Picea sp.	0	0	0	0	0	1	0	0	0	0	0	1	1	0	0	0	0	0	1	0	0	0	0	0	0	0
GYM:Pinaceae	Picea	Picea (sect. Abies)	Picea crassifolia Kom.	Farjon 1990, GBIF	Picea sp.	0	0	0	0	0	0	0	0	0	0	0	0	1	0	1	1	0	0	0	0	0	0	0	1	0	1
GYM:Pinaceae	Picea	Picea (sect. Abies)	Picea meyeri Rehder & E.H.Wilson	Farjon 1990, Fang et al. 2011, FOC, GBIF	Picea sp.	0	0	0	0	0	0	0	0	0	0	0	0	0	1	1	1	0	0	0	0	0	0	0	1	0	0
GYM:Pinaceae	Picea	Picea (sect. Abies)	Picea schrenkiana Fisch. & C.A.Mey.	Farjon 1990, GBIF	Picea sp.	0	0	0	0	0	0	0	1	1	1	0	0	0	0	0	1	1	0	0	0	0	0	0	1	0	1
GYM:Pinaceae	Picea	Picea (sect. Abies)	Picea neoveitchii Mast.	Farjon 1990, Fang et al. 2011, FOC, GBIF	Picea sp.	0	0	0	0	1	0	0	0	0	0	0	1	1	0	1	1	0	0	0	0	0	0	0	1	0	0
GYM:Pinaceae	Picea	Picea (sect. Abies)	Picea torano (K.Koch) Koehne	Farjon 1990, FOJ, GBIF	Picea sp.	0	0	0	0	1	1	0	0	1	0	0	0	0	0	0	0	0	0	0	0	0	0	0	0	0	0
GYM:Pinaceae	Picea	Picea (sect. Abies)	Picea alcoquiana (Veitch ex Lindl.) Carrière	Farjon 1990, FOJ, GBIF	Picea sp.	0	0	0	0	1	1	0	0	1	0	0	0	0	0	0	0	0	0	0	0	0	0	0	0	0	0
GYM:Pinaceae	Picea	Picea (sect. Abies)	Picea maximowiczii Regel ex Mast.	Farjon 1990, FOJ, GBIF	Picea sp.	0	0	0	0	0	0	0	0	1	0	0	0	0	0	0	0	0	0	0	0	0	0	0	0	0	0
GYM:Pinaceae	Picea	Picea (sect. Abies)	Picea morrisonicola Hayata	Farjon 1990, Fang et al. 2011, FOC, GBIF	Picea sp.	0	0	0	0	1	1	1	0	0	0	0	0	0	0	0	0	0	0	0	0	0	0	0	0	0	0
GYM:Pinaceae	Picea	Picea (sect. Abies)	Picea wilsonii Mast.	Farjon 1990, Fang et al. 2011, FOC, GBIF	Picea sp.	0	0	0	0	1	0	0	0	0	0	0	0	1	1	1	1	0	0	0	0	0	0	0	1	0	0
GYM:Pinaceae	Picea	Picea (sect. Abies)	Picea smithiana (Wall.) Boiss.	Browicz 1982 (1), Farjon 1990, FOP, GBIF	Picea sp.	0	0	0	0	1	1	0	0	0	0	0	1	1	0	1	1	0	0	0	0	1	1	0	0	0	0
GYM:Pinaceae	Picea	Picea (sect. Abies)	Picea glauca (Moench) Voss	Farjon 1990, Thompson 1999 (a), GBIF, PDB	Picea sp.	0	0	0	0	1	1	0	0	1	1	0	0	0	0	0	1	1	0	0	0	0	1	0	0	0	0
GYM:Pinaceae	Picea	Picea (sect. Rubentes)	Picea mariana Kuntze	Farjon 1990, Thompson 1999 (a), GBIF, PDB	Picea sp.	0	0	0	0	1	1	0	1	1	1	0	0	0	0	0	1	1	0	0	0	0	1	0	0	0	0
GYM:Pinaceae	Picea	Picea (sect. Rubentes)	Picea rubens Sarg.	Farjon 1990, Thompson 1999 (a), GBIF, PDB	Picea sp.	0	0	0	0	1	1	0	0	1	0	0	0	0	0	0	0	0	0	0	0	0	0	0	0	0	0
GYM:Pinaceae	Picea	Picea (sect. Rubentes)	Picea glehnii (Fr.Schmidt) Mast.	Farjon 1990, FOJ, GBIF	Picea sp.	0	0	0	0	0	0	0	0	1	1	0	0	0	0	0	0	0	0	0	0	0	0	0	0	0	0
GYM:Pinaceae	Picea	Picea (sect. Rubentes)	Picea orientalis (L.) Link	Browicz 1982 (1), Farjon 1990, GBIF	Picea sp.	0	0	0	0	1	1	0	1	1	1	0	0	0	0	0	0	1	0	0	0	0	0	0	0	0	0
GYM:Pinaceae	Picea	Picea (sect. Omorikae)	Picea omorika (Pancic) Purk.	Farjon 1990, Caudullo et al 2017,GBIF, TCW	Picea sp.	0	0	0	0	0	1	0	0	1	0	0	0	0	0	0	0	0	0	0	0	0	0	0	0	0	0
GYM:Pinaceae	Picea	Picea (sect. Omorikae)	Picea brachytyla (Franch.) E.Pritz.	Farjon 1990, Fang et al. 2011, FOC, GBIF, TCW	Picea sp.	0	0	0	0	1	1	0	0	0	0	0	1	1	0	1	1	1	0	0	0	0	0	0	0	0	0
GYM:Pinaceae	Picea	Picea (sect. Omorikae)	Picea farreri C.N.Page & Rushforth	Farjon 1990, Fang et al. 2011, FOC, GBIF	Picea sp.	0	0	0	0	0	0	0	0	0	0	0	0	1	0	0	0	0	0	0	0	0	0	0	0	0	0
GYM:Pinaceae	Picea	Picea (sect. Omorikae)	Picea spinulosa (Griff.) A.Henry	Farjon 1990, Fang et al. 2011, FOC, GBIF	Picea sp.	0	0	0	0	0	0	0	0	0	0	0	0	1	0	1	1	1	0	0	0	0	0	0	0	0	0
GYM:Pinaceae	Picea	Picea (sect. Omorikae)	Picea breweriana S.Watson	Farjon 1990, Thompson 1999 (a), GBIF, PDB, TCW	Picea sp.	0	0	0	0	0	0	0	0	0	0	0	0	0	0	0	0	0	0	1	0	0	0	0	0	0	0
GYM:Pinaceae	Picea	Picea (sect. Sitchenses)	Picea stichensis (Bong.) Carrière	Farjon 1990, Thompson 1999 (a), GBIF, PDB	Picea sp.	0	0	0	0	0	1	1	0	0	1	0	0	0	0	0	0	1	0	1	0	0	1	0	0	0	0
GYM:Pinaceae	Picea	Picea (sect. Sitchenses)	Picea jezoensis (Sieb. & Zucc.) Carrière +Picea jezoensis var komarovii (V.N.Vassil.) W.C.Cheng &L.K.Fu + Picea jezoensis var. Microsperma (Lindl.) W.C.Cheng & L.K.Fu + Picea jezoensis ssp. hondoensis (Mayr) P.Schmidt	Farjon 1990, Fang et al. 2011, FOC, FOJ, GBIF	Picea sp.	0	0	0	0	1	1	0	0	1	1	0	0	0	1	1	1	1	0	0	0	0	0	0	0	0	0
GYM:Pinaceae	Picea	Picea (sect. Sitchenses)	Picea likiangensis (Franch.) E.Pritz + P. likiangensis var hirtella (Rehder & E.H.Wilson) W.C.Cheng + P. likiangensis var linzhiensis W.C.Cheng & L.K.Fu + P. likiangensis var montigena (Mast.) W.C.Cheng + P. likiangensis var rubescens Rehder & E.H.Wilson	Farjon 1990, Fang et al. 2011, FOC, GBIF, TCW	Picea sp.	0	0	0	0	0	0	0	0	0	0	0	0	1	0	1	1	1	0	0	0	0	0	0	0	0	0
GYM:Pinaceae	Picea	Picea (sect. Sitchenses)	Picea purpurea Mast.	Farjon 1990, Fang et al. 2011, FOC, GBIF, TCW	Picea sp.	0	0	0	0	0	0	0	0	0	0	0	0	1	0	1	1	1	0	0	0	0	0	0	0	0	0
GYM:Pinaceae	Picea	Picea (sect. Pungentes)	Picea pungens Engelm.	Farjon 1990, Thompson 1999 (a), GBIF, PDB	Picea sp.	0	0	0	0	0	1	1	0	1	1	0	0	0	0	0	0	0	0	1	0	1	0	0	0	0	0
GYM:Pinaceae	Picea	Picea (sect. Pungentes)	Picea engelmannii Perry ex Engelm.	Farjon 1990, Thompson 1999 (a), GBIF, PDB	Picea sp.	0	0	0	0	0	1	1	0	1	1	0	1	1	0	0	0	1	1	1	0	1	1	0	0	0	0
GYM:Pinaceae	Pseudotsuga		Pseudotsuga menziensii (Mirb.) Franco	Farjon 1990, Thompson 1999 (a), GBIF, PDB	Larix vel Pseudotsuga	0	0	0	0	1	1	1	0	1	1	0	1	0	0	0	0	0	1	1	0	1	1	0	1	0	0
GYM:Pinaceae	Pseudotsuga		Pseudotsuga sinensis Dode	Farjon 1990, Fang et al. 2011, FOC, GBIF	Larix vel Pseudotsuga	0	0	0	0	1	1	1	0	0	0	0	1	1	0	0	0	0	0	0	0	0	0	0	0	0	0
GYM:Pinaceae	Pseudotsuga		Pseudotsuga japonica (Shirasawa) Beissn.	Farjon 1990, FOJ, GBIF, TCW	Larix vel Pseudotsuga	0	0	0	0	1	1	0	0	0	0	0	0	0	0	0	0	0	0	0	0	0	0	0	0	0	0
GYM:Pinaceae	Pseudotsuga		Pseudotsuga macrocarpa (Vasey) Mayr	Farjon 1990, Thompson 1999 (a), GBIF, PDB	Larix vel Pseudotsuga	0	0	0	0	0	0	0	0	0	0	0	0	0	0	0	0	0	1	1	0	0	0	0	0	0	0
GYM:Pinaceae	Larix		Larix decidua Mill.	Farjon 1990, GBIF	Larix vel Pseudotsuga	0	0	0	0	1	1	0	0	1	1	0	0	0	0	0	0	1	0	0	0	0	0	0	0	0	0
GYM:Pinaceae	Larix		Larix russica (Endl.) Sabine ex Trautv.	Farjon 1990	Larix vel Pseudotsuga	0	0	0	0	0	0	0	1	1	1	0	0	0	0	0	0	0	0	0	0	0	0	0	0	0	0
GYM:Pinaceae	Larix		Larix gmelini (Rupr.) Rupr.	Farjon 1990, Fang et al. 2011, FOC, GBIF	Larix vel Pseudotsuga	0	0	0	0	0	0	0	0	1	1	0	0	0	1	1	1	1	0	0	0	1	0	0	0	0	0
GYM:Pinaceae	Larix		Larix laricina (Du Roi) K.Koch	Farjon 1990, Thompson 1999 (a), GBIF, PDB	Larix vel Pseudotsuga	0	0	0	0	1	1	0	1	1	1	0	0	0	0	0	1	1	0	0	0	0	1	0	0	0	0
GYM:Pinaceae	Larix		Larix kaempferi (Lamb.) Carriere	Farjon 1990, FOJ, GBIF	Larix vel Pseudotsuga	0	0	0	0	1	1	0	0	1	1	0	0	0	0	0	0	0	0	0	0	0	0	0	0	0	0
GYM:Pinaceae	Larix		Larix griffithi Hook (l. griffithiana (lindl. & Gord.) Carriere)	Farjon 1990, Fang et al. 2011, FOC, GBIF	Larix vel Pseudotsuga	0	0	0	0	0	0	0	0	0	0	0	1	1	0	1	1	1	0	0	0	0	0	0	1	0	0
GYM:Pinaceae	Larix		Larix potaninii Batalin	Farjon 1990, Fang et al. 2011, FOC, GBIF	Larix vel Pseudotsuga	0	0	0	0	0	0	0	0	0	0	0	1	1	0	1	1	1	0	0	0	0	0	0	1	0	0
GYM:Pinaceae	Larix		Larix mastersiana Reder & Wilson	Farjon 1990, Fang et al. 2011, FOC, GBIF	Larix vel Pseudotsuga	0	0	0	0	0	0	0	0	0	0	0	1	1	0	0	1	1	0	0	0	0	0	0	0	0	0
GYM:Pinaceae	Larix		Larix lyallii Parl.	Farjon 1990, Thompson 1999 (a), GBIF, PDB, FNA	Larix vel Pseudotsuga	0	0	0	0	0	1	1	0	1	1	0	0	0	0	0	0	1	0	1	0	1	1	0	1	0	0
GYM:Pinaceae	Larix		Larix occidentalis Nutt.	Farjon 1990, Thompson 1999 (a), GBIF, PDB, FNA	Larix vel Pseudotsuga	0	0	0	0	1	1	1	0	1	1	0	0	0	0	0	0	1	0	1	0	1	1	0	1	0	0
GYM:Pinaceae	Larix		Larix himalaica W.C.Cheng et L.K.Fu	Fang et al. 2011, FOC		0	0	0	0	0	0	0	0	0	0	0	0	0	0	0	1	1	0	0	0	0	0	0	0	0	0
GYM:Pinaceae	Tsuga		Tsuga sieboldii Carrière	Farjon 1990, FOJ, GBIF	Tsuga sp. (echinate)	0	0	0	0	1	1	0	0	0	0	0	0	0	0	0	0	0	0	0	0	0	0	0	0
GYM:Pinaceae	Tsuga		Tsuga diversifolia (Maxim.) Mast.	Farjon 1990, FOJ, GBIF	Tsuga sp. (echinate)	0	0	0	0	1	1	0	0	1	1	0	0	0	0	0	0	0	0	0	0	0	0	0	0	0	0
GYM:Pinaceae	Tsuga		Tsuga dumosa (D.Don) Eichler	Farjon 1990, Fang et al. 2011, FOC, GBIF	Tsuga sp. (echinate)	0	0	0	0	0	0	0	0	0	0	0	1	1	0	1	1	1	0	0	0	0	0	1	1	0	0
GYM:Pinaceae	Tsuga		Tsuga chinensis (Frach.) Pritzel in Diels + Tsuga chinensis var. robusta C.Y.Cheng & L.K.Fu	Farjon 1990, Fang et al. 2011, FOC, GBIF	Tsuga sp. (echinate)	0	1	0	1	1	1	0	0	0	0	0	1	1	0	1	1	0	0	0	0	0	0	0	1	0	0
GYM:Pinaceae	Tsuga		Tsuga forresti Downie	Farjon 1990, Fang et al. 2011, FOC, GBIF, TCW	Tsuga sp. (echinate)	0	0	0	0	0	0	0	0	0	0	0	1	1	0	1	1	0	0	0	0	0	0	0	0	0	0
GYM:Pinaceae	Tsuga		Tsuga canadensis (L.) Carrière	Farjon 1990, Thompson 1999 (a), GBIF, PDB	Tsuga sp. (non echinate)	0	0	0	0	1	1	0	1	1	1	0	0	0	0	0	0	0	0	0	0	0	0	0	0	0	0
GYM:Pinaceae	Tsuga		Tsuga caroliniana Engelm.	Farjon 1990, Thompson 1999 (a), GBIF, PDB	Tsuga sp. (few echini)	0	0	0	0	1	1	0	0	0	0	0	0	0	0	0	0	0	0	0	0	0	0	0	0	0	0
GYM:Pinaceae	Tsuga		Tsuga heterophylla (Raf.) Sargent	Farjon 1990, Thompson 1999 (a), GBIF, PDB	Tsuga sp. (echinate)	0	0	0	0	0	1	1	0	1	1	0	0	0	0	0	0	1	0	1	0	1	1	0	0	0	0
GYM:Pinaceae	Tsuga		Tsuga mertensiana (Bong.) Carrière + Tsuga mertensianaTsuga mertensiana var. grandicona Farjon	Farjon 1990, Thompson 1999 (a), GBIF, PDB	Tsuga sp. (echinate)	0	0	0	0	0	0	0	0	1	1	0	0	0	0	0	0	1	0	1	0	1	1	0	0	0	0
Buxales:Buxaceae	Buxus	Eurasian clade	Buxus balearica Lam.	Brückner 1993, von Balthazar et al. 2000, GBIF, Browicz 1986 (5)	balearica type	0	0	0	0	0	0	0	0	0	0	0	0	0	0	0	0	0	1	1	0	0	0	0	1	0	0
Buxales:Buxaceae	Buxus	Eurasian clade	Buxus sempervirens L. (=B. colchica, B. hyrcana)	Brückner 1993, von Balthazar et al. 2000, GBIF, Browicz 1986 (5)	balearica type	0	0	0	0	1	1	1	0	0	0	0	0	0	0	0	0	0	1	1	0	0	0	0	1	0	0
Buxales:Buxaceae	Buxus	Eurasian clade	Buxus papillosa C.K.Schneid.	Brückner 1993, von Balthazar et al. 2000, GBIF, FOP	balearica type	0	0	0	0	1	1	0	0	0	0	0	1	1	0	0	0	0	0	0	0	0	0	1	0	1	0
Buxales:Buxaceae	Buxus	Eurasian clade	Buxus wallichiana Baill.	Brückner 1993, von Balthazar et al. 2000, GBIF, FOP	balearica type	0	0	0	0	1	1	0	0	0	0	0	1	1	0	0	0	0	0	0	0	0	0	0	0	0	0
Buxales:Buxaceae	Buxus	Eurasian clade	Buxus bodinieri H.Léveillé	Fang et al. 2011, FOC, Brückner 1993, von Balthazar et al. 2000, GBIF	balearica type	0	0	0	0	1	1	0	0	0	0	0	1	1	0	0	0	0	0	0	0	0	0	0	0	0	0
Buxales:Buxaceae	Buxus	Eurasian clade	Buxus henryi Mayr	Fang et al. 2011, FOC, Brückner 1993, von Balthazar et al. 2000, GBIF	balearica type	0	0	0	0	1	1	0	0	0	0	0	1	1	0	0	0	0	0	0	0	0	0	0	0	0	0
Buxales:Buxaceae	Buxus	Eurasian clade	Buxus harlandii Rehd & Wils.	Fang et al. 2011, FOC, Brückner 1993, von Balthazar et al. 2000, GBIF	balearica type	0	1	0	1	1	1	0	0	0	0	0	1	1	0	0	0	0	0	0	0	0	0	0	0	0	0
Buxales:Buxaceae	Buxus	Eurasian clade	Buxus ichangensis Hatusima	Fang et al. 2011, FOC, Brückner 1993, von Balthazar et al. 2000, GBIF	balearica type	0	0	0	0	1	0	0	0	0	0	0	1	0	0	0	0	0	0	0	0	0	0	0	0	0	0
Buxales:Buxaceae	Buxus	Eurasian clade	Buxus stenophylla Hance	Fang et al. 2011, FOC, Brückner 1993, von Balthazar et al. 2000, GBIF	balearica type	0	0	0	0	1	0	0	0	0	0	0	1	1	0	0	0	0	0	0	0	0	0	0	0	0	0
Buxales:Buxaceae	Buxus	Eurasian clade	Buxus microphylla Sieb. & Zucc.	Brückner 1993, von Balthazar et al. 2000, GBIF, FOJ	balearica type	0	0	0	0	1	1	0	0	0	0	0	0	0	0	0	0	0	0	0	0	0	0	0	0	0	0
Buxales:Buxaceae	Buxus	Eurasian clade	Buxus rugulosa Hatusima	Fang et al. 2011, FOC, Brückner 1993, von Balthazar et al. 2000, GBIF	balearica type	0	0	0	0	1	0	0	0	0	0	0	1	1	0	0	0	0	0	0	0	0	0	0	0	0	0
Buxales:Buxaceae	Buxus	Eurasian clade	Buxus sinica (Rehder & E.H.Wilson) M.Cheng	Fang et al. 2011, FOC, Brückner 1993, von Balthazar et al. 2000, GBIF	balearica type	0	1	0	1	1	1	0	0	0	0	0	1	1	0	0	0	0	0	0	0	0	0	0	0	0	0
Saxifragales: Hamamelidaceae	Parrotia		Parrotia persica C.A.Mey.	Browicz, 1982 (1), GBIF		0	0	0	0	1	0	0	0	0	0	0	1	1	0	0	0	0	0	0	0	1	0	1	0	0	0
Saxifragales: Hamamelidaceae	Parrotia		Parrotia subaequalis (H.T.Chang) R.M. Hao & H.T.Wei	FOC, Fang et al. 2011, GBIF		0	0	0	0	1	0	0	0	0	0	0	0	0	0	0	0	0	0	0	0	0	0	0	0	0	0
Saxifragales:Altingiaceae	Liquidambar		Liquidambar orientalis Mill.	GBIF, Browicz 1982 (1)	Liquidambar sp.	0	0	0	0	0	0	0	0	0	0	0	0	0	0	0	0	0	1	0	0	0	0	0	0	0	0
Saxifragales:Altingiaceae	Liquidambar		Liquidambar styraciflua L.	Thompson et al. 1999 (B),FNA, GBIF, CVPM	Liquidambar sp.	1	1	0	1	1	1	0	0	0	0	0	1	0	0	0	0	0	0	0	0	0	0	0	0	0	0
Saxifragales:Altingiaceae	Liquidambar		Liquidambar acalycina H.T.Chang	FOC, Fang et al. 2011, GBIF	Liquidambar sp.	0	0	0	0	1	1	0	0	0	0	0	1	1	0	0	0	0	0	0	0	0	0	0	0	0	0
Saxifragales:Altingiaceae	Liquidambar		Liquidambar formosana Hance	FOC, Fang et al. 2011, GBIF	Liquidambar sp.	0	1	0	1	1	1	0	0	0	0	0	1	1	0	0	0	0	0	0	0	0	0	0	0	0	0
Saxifragales:Altingiaceae	Liquidambar		Liquidambar cathayensis (H.T. Chang) Ickert-Bond & J.Wen (=Semiliquidambar c.)	FOC, Fang et al. 2011	Liquidambar sp.	0	1	0	1	1	1	0	0	0	0	0	1	1	0	0	0	0	0	0	0	0	0	0	0	0	0
Saxifragales:Altingiaceae	Liquidambar		Liquidambar caudata (H.T. Chang) Ickert-Bond & J.Wen (=Semiliquidambar c.)	FOC, Fang et al. 2011	Liquidambar sp.	0	0	0	0	1	0	0	0	0	0	0	0	0	0	0	0	0	0	0	0	0	0	0	0	0	0
Saxifragales:Altingiaceae	Liquidambar		Liquidambar chingii (F.P. Metcalf) Ickert-Bond & J.Wen (=Semiliquidambar c.)	FOC, Fang et al. 2011	Liquidambar sp.	0	0	0	0	1	0	0	0	0	0	0	1	0	0	0	0	0	0	0	0	0	0	0	0	0	0
Malpighiales: Salicaceae	Populus		Popullus adenopoda Maxim.	Fang et al. 2011, FOC, GBIF		0	0	0	0	1	1	0	0	0	0	0	1	1	0	0	0	0	0	0	0	0	0	0	1	0	1
Malpighiales: Salicaceae	Populus		Populus ciliata Wall. Ex Royle	Fang et al. 2011, FOC, GBIF		0	0	0	0	1	1	0	0	1	1	0	0	1	0	0	0	0	0	0	0	0	0	0	0	0	0
Malpighiales: Salicaceae	Populus		Populus przewalskii Maxim.	Fang et al. 2011, FOC, GBIF		0	0	0	0	0	0	0	0	0	0	0	0	0	0	1	1	0	0	0	0	0	0	0	1	0	1
Malpighiales: Salicaceae	Populus		Populus afghanica (Aitch. & Hemsl.) C.K.Schneider in Sarg.	Fang et al. 2011, FOC, GBIF, FOP		0	0	0	0	1	1	0	1	1	1	0	0	0	0	0	0	1	1	0	0	0	0	0	1	0	1
Malpighiales: Salicaceae	Populus		Populus alaschanica Komarov	Fang et al. 2011, FOC, GBIF		0	0	0	0	0	0	0	0	0	0	0	0	0	0	0	0	0	0	0	0	0	0	0	0	0	1
Malpighiales: Salicaceae	Populus		Populus alba L.	Caudullo et al. 2017, Fang et al. 2011, FOC,		0	0	0	0	1	1	1	1	1	0	0	1	1	1	1	1	1	1	1	1	1	1	1	1	0	1
Malpighiales: Salicaceae	Populus		Populus amurensis Komarov	Fang et al. 2011, FOC, GBIF		0	0	0	0	0	0	0	0	0	0	0	0	0	0	1	1	0	0	0	0	0	0	0	0	0	0
Malpighiales: Salicaceae	Populus		Populus angustifolia E.James	FNA, GBIF, PDB		0	0	0	0	1	1	0	0	1	1	0	0	0	0	0	0	0	1	1	0	0	0	0	1	0	0
Malpighiales: Salicaceae	Populus		Populus balsamifera L.	Thompson et al. 1999 (B), FNA, GBIF, PDB		0	0	0	0	1	1	1	1	1	1	0	0	0	0	0	0	0	1	1	0	0	1	1	1	0	1
Malpighiales: Salicaceae	Populus		Populus caspica Bornm. (=P. bachofeni Wierzb.)	GBIF, Browicz 1982		0	0	0	0	1	1	0	0	1	0	0	1	0	0	0	0	0	1	1	0	0	0	0	1	0	0
Malpighiales: Salicaceae	Populus		Populus cathayana Rehder	Fang et al. 2011, FOC, GBIF		0	0	0	0	1	1	0	0	0	0	0	1	1	1	1	1	0	0	0	0	0	0	0	1	0	1
Malpighiales: Salicaceae	Populus		Populus davidiana Dode	Fang et al. 2011, FOC, GBIF		0	0	0	0	1	1	0	0	0	0	0	1	1	1	1	1	0	0	0	0	0	0	0	1	0	1
Malpighiales: Salicaceae	Populus		Populus deltoides W.Bartram ex Marshall	FNA, GBIF, PDB		0	0	0	0	1	1	0	1	1	0	0	1	1	1	1	0	0	0	0	0	0	0	0	1	1	0
Malpighiales: Salicaceae	Populus		Populus euphratica Oliv.	GBIF, Browicz 1982, Fang et al. 2011, FOC, FOP		0	0	0	0	1	0	0	1	1	1	0	0	0	0	1	1	1	1	1	0	0	0	1	1	1	1
Malpighiales: Salicaceae	Populus		Populus fremonti S.Watson	Thompson et al. 1999 (B), FNA, GBIF, PDB		0	0	0	0	0	0	0	0	1	0	0	1	1	0	0	0	0	1	1	0	0	0	1	1	1	1
Malpighiales: Salicaceae	Populus		Populus glauca H.H.Haines	Fang et al. 2011, FOC, GBIF		0	0	0	0	0	0	0	0	0	0	0	0	1	0	0	0	0	0	0	0	0	0	0	0	0	0
Malpighiales: Salicaceae	Populus		Populus grandidentata Michx.	Thompson et al. 1999 (B), FNA, GBIF, PDB		0	0	0	0	1	1	0	1	1	0	0	0	0	0	0	0	0	0	0	0	0	0	0	0	0	0
Malpighiales: Salicaceae	Populus		Populus guzmanantlensis A.Váquez &	CVPM, GBIF		0	0	0	0	0	0	0	0	0	0	0	1	1	0	0	0	0	0	0	0	0	0	0	0	0	0
Malpighiales: Salicaceae	Populus		Populus haoana W.C.Cheng & C.Wang in C.Wang & S.L.Tung	Fang et al. 2011, FOC, GBIF		0	0	0	0	0	0	0	0	0	0	0	0	1	0	0	0	0	0	0	0	0	0	0	0	0	0
Malpighiales: Salicaceae	Populus		Populus heterophylla L.	Thompson et al. 1999 (B), FNA, GBIF, PDB		0	0	0	0	1	0	0	1	1	0	0	0	0	0	0	0	0	0	0	0	0	0	0	0	0	0
Malpighiales: Salicaceae	Populus		Populus hsinganica C.Wang & Skvortzov	Fang et al. 2011, FOC, GBIF		0	0	0	0	0	0	0	0	0	0	0	0	0	0	1	1	0	0	0	0	0	0	0	1	0	1
Malpighiales: Salicaceae	Populus		Populus intramongolica T. Y. Sun et E. W. Ma	Fang et al. 2011, FOC, GBIF		0	0	0	0	0	0	0	0	0	0	0	0	0	0	0	0	0	0	0	0	0	0	0	0	0	1
Malpighiales: Salicaceae	Populus		Populus kangdingensis C. Wang et S. L. Tung	Fang et al. 2011, FOC, GBIF		0	0	0	0	0	0	0	0	0	0	0	0	1	0	1	1	1	0	0	0	0	0	0	0	0	0
Malpighiales: Salicaceae	Populus		Populus keerqinensis T. Y. Sun	Fang et al. 2011, FOC, GBIF		0	0	0	0	0	0	0	0	0	0	0	0	0	1	1	0	0	0	0	0	0	0	0	1	0	0
Malpighiales: Salicaceae	Populus		Populus lancifolia N.Chao	Fang et al. 2011, FOC, GBIF		0	0	0	0	0	0	0	0	0	0	0	0	1	0	0	0	0	0	0	0	0	0	0	0	0	0
Malpighiales: Salicaceae	Populus		Populus lasiocarpa Oliv.	Fang et al. 2011, FOC, GBIF		0	0	0	0	1	1	0	0	0	0	0	1	1	0	1	1	0	0	0	0	0	0	0	0	0	0
Malpighiales: Salicaceae	Populus		Populus laurifolia Ledebour	Fang et al. 2011, FOC, GBIF		0	0	0	0	0	0	0	0	1	1	0	0	0	1	1	0	0	0	0	0	0	0	0	1	0	1
Malpighiales: Salicaceae	Populus		Populus mainlingensis C. Wang et S. L. Tung	Fang et al. 2011, FOC, GBIF		0	0	0	0	0	0	0	0	0	0	0	0	0	0	1	1	1	0	0	0	0	0	0	1	0	0
Malpighiales: Salicaceae	Populus		Populus manshurica Nakai	Fang et al. 2011, FOC, GBIF		0	0	0	0	0	0	0	0	0	0	0	0	0	1	1	0	0	0	0	0	0	0	0	0	0	0
Malpighiales: Salicaceae	Populus		Populus maximowiczii A. Henry	Fang et al. 2011, FOC, GBIF		0	0	0	0	0	0	0	0	0	0	0	1	1	1	1	1	0	0	0	0	0	0	0	1	0	0
Malpighiales: Salicaceae	Populus		Populus mexicana Wesm.	CVPM, GBIF		0	0	0	1	1	0	0	0	0	0	0	0	0	0	0	0	0	0	0	0	0	0	1	0	1	0
Malpighiales: Salicaceae	Populus		Populus minhoensis S. F. Yang et H. F.Wu	Fang et al. 2011, FOC, GBIF		0	0	0	0	0	0	0	0	0	0	0	0	0	0	0	1	0	0	0	0	0	0	0	0	0	0
Malpighiales: Salicaceae	Populus		Populus nakaii Skvortsov	Fang et al. 2011, FOC, GBIF		0	0	0	0	0	0	0	0	0	0	0	0	0	1	1	0	0	0	0	0	0	0	0	1	0	0
Malpighiales: Salicaceae	Populus		Populus nigra L	Caudullo et al. 2017, Fang et al. 2011, FOC		0	0	0	0	1	1	1	1	1	0	0	0	0	0	0	0	0	1	1	1	1	0	0	1	0	1
Malpighiales: Salicaceae	Populus		Populus ningshanica C. Wang et S. L. Tung	Fang et al. 2011, FOC, GBIF		0	0	0	0	0	0	0	0	0	0	0	1	1	0	0	0	0	0	0	0	0	0	0	0	0	0
Malpighiales: Salicaceae	Populus		Populus pamirica Kom.	Fang et al. 2011, FOC, FOP, GBIF		0	0	0	0	1	1	0	1	1	1	0	0	0	0	0	0	0	1	1	0	0	0	0	1	0	1
Malpighiales: Salicaceae	Populus		Populus perdomii Rehder	Fang et al. 2011, FOC, GBIF		0	0	0	0	0	0	0	0	0	0	0	1	1	1	1	1	1	0	0	0	0	0	0	1	0	0
Malpighiales: Salicaceae	Populus		Populus pilosa Rehder	Fang et al. 2011, FOC, GBIF		0	0	0	0	0	0	0	1	1	1	0	0	0	0	0	0	0	0	0	0	0	0	0	1	0	1
Malpighiales: Salicaceae	Populus		Populus platyphylla T.Z.Sun	Fang et al. 2011, FOC, GBIF		0	0	0	0	0	0	0	0	0	0	0	0	0	0	0	0	0	0	0	0	0	0	0	0	0	1
Malpighiales: Salicaceae	Populus		Populus pruinosa Schrenk	GBIF, Browicz 1982		0	0	0	0	0	0	0	0	0	0	0	0	0	0	0	0	0	1	0	0	1	1	1	1	1	1
Malpighiales: Salicaceae	Populus		Populus pruinosa Schrenk	Fang et al. 2011, FOC, GBIF		0	0	0	0	0	0	0	0	1	1	0	0	0	0	1	1	0	0	0	0	0	0	0	1	0	1
Malpighiales: Salicaceae	Populus		Populus pseudoglauca C. Wang et P. Y. Fu	Fang et al. 2011, FOC, GBIF		0	0	0	0	0	0	0	0	0	0	0	0	1	0	1	1	0	0	0	0	0	0	0	0	0	0
Malpighiales: Salicaceae	Populus		Populus pseudomaximowiczii C. Wang et S. L. Tung	Fang et al. 2011, FOC, GBIF		0	0	0	0	0	0	0	0	0	0	0	0	1	0	1	1	0	0	0	0	0	0	0	0	0	0
Malpighiales: Salicaceae	Populus		Populus pseudosimonii Kitag.	Fang et al. 2011, FOC, GBIF		0	0	0	0	1	0	0	0	0	0	0	1	1	1	1	1	0	0	0	0	0	0	0	1	0	0
Malpighiales: Salicaceae	Populus		Populus qamdoensis C.Wang & S.L.Tung	Fang et al. 2011, FOC, GBIF		0	0	0	0	0	0	0	0	0	0	0	0	1	0	1	1	0	0	0	0	0	0	0	0	0	0
Malpighiales: Salicaceae	Populus		Populus qiongdaoensis T. Hong et P. Luo	Fang et al. 2011, FOC, GBIF		0	0	0	1	0	0	0	0	0	0	0	1	0	0	0	0	0	0	0	0	0	0	0	0	0	0
Malpighiales: Salicaceae	Populus		Populus rotundifolia Griff.	Fang et al. 2011, FOC, GBIF		0	0	0	0	0	0	0	0	0	0	0	1	1	0	1	1	0	0	0	0	0	0	0	0	0	0
Malpighiales: Salicaceae	Populus		Populus schneideri (Rehder) N. Chao	Fang et al. 2011, FOC, GBIF		0	0	0	0	0	0	0	0	0	0	0	0	1	0	0	1	0	0	0	0	0	0	0	0	0	0
Malpighiales: Salicaceae	Populus		Populus shanxiensis C.Wang & S.L.Tung	Fang et al. 2011, FOC, GBIF		0	0	0	0	0	0	0	0	0	0	0	0	0	1	1	0	0	0	0	0	0	0	0	1	0	0
Malpighiales: Salicaceae	Populus		Populus sieboldii Miq.	FOJ, GBIF		0	0	0	0	1	1	0	0	1	0	0	0	0	0	0	0	0	0	0	0	0	0	0	0	0	0
Malpighiales: Salicaceae	Populus		Populus simonii Carr.	Fang et al. 2011, FOC, GBIF		0	0	0	0	1	1	0	0	0	0	0	1	1	1	1	1	0	0	0	0	0	0	0	1	0	0
Malpighiales: Salicaceae	Populus		Populus suaveolens Fisch (=P. koreana)	Fang et al. 2011, FOC, GBIF		0	0	0	0	0	0	0	0	0	0	0	1	1	1	1	1	0	0	0	0	0	0	0	1	0	0
Malpighiales: Salicaceae	Populus		Populus szechuanica C.K.Schneid.	Fang et al. 2011, FOC, GBIF		0	0	0	0	1	1	0	0	0	0	0	0	1	1	1	1	1	0	0	0	0	0	0	1	0	0
Malpighiales: Salicaceae	Populus		Populus talassica Komarov.	Fang et al. 2011, FOC, GBIF		0	0	0	0	0	0	0	0	1	1	0	0	0	0	0	1	1	0	0	0	0	0	0	1	0	1
Malpighiales: Salicaceae	Populus		Populus tometosa Carr.	Fang et al. 2011, FOC, GBIF		0	0	0	0	1	0	0	0	0	0	0	1	1	0	0	0	0	0	0	0	0	0	0	1	0	0
Malpighiales: Salicaceae	Populus		Populus tremula L.	GBIF, Browicz 1982, Caudullo et al. 2017, FOC, Fang et al. 2011, DVFn		0	0	0	0	1	1	1	1	1	1	0	0	0	1	1	1	0	1	1	0	1	1	0	1	0	0
Malpighiales: Salicaceae	Populus		Populus tremuloides Michx.	Thompson et al. 1999 (B), FNA, GBIF, PDB		0	0	0	0	1	1	0	1	1	1	0	1	1	0	0	0	0	0	1	0	1	1	1	1	1	0
Malpighiales: Salicaceae	Populus		Populus trichocarpa Torr. & A.Gray	FNA, PDB		0	0	0	0	1	1	0	0	1	1	0	0	0	0	0	0	0	0	1	0	1	1	0	1	0	0
Malpighiales: Salicaceae	Populus		Populus trinervis C.Wang & S.L.Tung	Fang et al. 2011, FOC, GBIF		0	0	0	0	0	0	0	1	0	0	0	0	1	0	0	0	0	0	0	0	0	0	0	0	0	0
Malpighiales: Salicaceae	Populus		Populus wenxianica Y.C.Feng & J.L.Guo ex G.H.Zhu	Fang et al. 2011, FOC, GBIF		0	0	0	0	0	0	0	0	0	0	0	1	1	0	0	0	0	0	0	0	0	0	0	1	0	0
Malpighiales: Salicaceae	Populus		Populus wilsonii C.K.Schneider	Fang et al. 2011, FOC, GBIF		0	0	0	0	1	1	0	0	0	0	0	1	1	0	1	1	0	0	0	0	0	0	0	0	0	0
Malpighiales: Salicaceae	Populus		Populus wuana C.Wang & S.L.Tung	Fang et al. 2011, FOC, GBIF		0	0	0	0	0	0	0	0	0	0	0	1	1	0	0	1	0	0	0	0	0	0	0	0	0	0
Malpighiales: Salicaceae	Populus		Populus wulianemsis S.B.Liang & X.W.Li	Fang et al. 2011, FOC, GBIF		0	0	0	0	0	0	0	0	0	0	0	1	0	0	0	0	0	0	0	0	0	0	0	0	0	0
Malpighiales: Salicaceae	Populus		Populus yatungensis (C.Wang& P.X.Fu) C.Wang & S.L.Tung	Fang et al. 2011, FOC, GBIF		0	0	0	0	0	0	0	0	0	0	0	0	1	0	0	1	1	0	0	0	0	0	0	1	0	0
Malpighiales: Salicaceae	Populus		Populus yunnanensis Dode	Fang et al. 2011, FOC, GBIF		0	0	0	0	0	0	0	0	0	0	0	1	1	0	0	0	0	0	0	0	0	0	0	0	0	0
Malpighiales: Salicaceae	Salix			GBIF		0	1	1	1	1	1	1	1	1	1	1	1	1	1	1	1	1	1	1	1	1	1	1	1	1	1
Malpighiales: Euphorbiaceae				GBIF		1	0	1	1	1	1	1	1	1	1	0	1	1	1	1	1	1	1	1	1	1	1	1	1	1	1
Malpighiales: Linaceae	Linum			GBIF		0	1	1	1	1	1	1	1	1	1	0	1	1	1	1	1	1	1	1	0	1	1	1	1	1	1
Fabales: Polygalaceae				GBIF		1	1	1	1	1	1	1	1	1	1	0	1	1	1	1	1	1	1	1	1	1	0	1	1	1	1
Fabales: Fabaceae				GBIF		1	1	1	1	1	1	1	1	1	1	1	1	1	1	1	1	1	1	1	1	1	1	1	1	1	1
Fabales: Fabaceae	Apios		Apios americana Medik.	FNA, PDB, GBIF		1	1	0	1	1	1	0	1	1	0	0	0	0	1	0	0	0	0	0	0	0	0	0	0	0	0
Fabales: Fabaceae	Apios		Apios carnea (Wall.) Benth. ex Baker in J.D.Hooker	FOC, GBIF		0	0	0	1	1	0	0	0	0	0	0	1	1	0	0	0	0	0	0	0	0	0	0	0	0	0
Fabales: Fabaceae	Apios		Apios gracilima Dunn	FOC, GBIF		0	0	0	0	0	0	0	0	0	0	0	1	1	0	0	0	0	0	0	0	0	0	0	0	0	0
Fabales: Fabaceae	Apios		Apios delavayi Franch.	FOC, GBIF		0	0	0	0	0	0	0	0	0	0	0	1	1	0	0	0	0	0	0	0	0	0	0	0	0	0
Fabales: Fabaceae	Apios		Apios fortunei Maxim.	FOC, GBIF		0	0	0	0	1	1	0	0	1	0	0	1	1	0	0	0	0	0	0	0	0	0	0	0	0	0
Fabales: Fabaceae	Apios		Apios macrantha Oliver	FOC, GBIF		0	0	0	0	0	0	0	0	0	0	0	1	1	0	0	0	0	0	0	0	0	0	0	0	0	0
Fabales: Fabaceae	Apios		Apios taiwaniana Hosokawa	FOC, GBIF		0	0	0	0	1	1	1	0	0	0	0	1	1	0	0	0	0	0	0	0	0	0	0	0	0	0
Rosales:Rosaceae				GBIF	Rosaceae gen. indet.	1	1	1	1	1	1	1	1	1	1	1	1	1	1	1	1	1	1	1	1	1	1	1	1	1	1
Rosales:Rosaceae	Prunus		Prunus apetala (Siebold & Zucc.) Franch. & Sav.	Thompson et al. 1999b	Rosaceae gen. indet.	0	0	0	0	1	0	0	0	0	0	0	0	0	0	0	0	0	0	0	0	0	0	0	0	0	0
Rosales:Rosaceae	Prunus		Prunus avium (L.) L. [FoC: Cerasus ~ Mill.]	Thompson et al. 1999b	Rosaceae gen. indet.	0	0	0	0	0	1	0	0	1	0	0	0	0	0	0	0	0	0	1	0	0	0	0	0	0	0
Rosales:Rosaceae	Prunus		Prunus caroliniana (Mill.) Aiton [≡ Padus ~ Mill.]	Thompson et al. 1999b	Rosaceae gen. indet.	0	0	0	0	1	0	0	0	0	0	0	0	0	0	0	0	0	0	0	0	0	0	0	0	0	0
Rosales:Rosaceae	Prunus		Prunus grayana Maxim. [FoC: Padus ~ (~) C.K.Schneid.]	Thompson et al. 1999b	Rosaceae gen. indet.	0	0	0	0	1	1	0	0	0	0	0	0	1	0	0	0	0	0	0	0	0	0	0	0	0	0
Rosales:Rosaceae	Prunus		Prunus incisa Thunb.	Thompson et al. 1999b	Rosaceae gen. indet.	0	0	0	0	0	0	0	0	1	0	0	0	0	0	0	0	0	0	0	0	0	0	0	0	0	0
Rosales:Rosaceae	Prunus		Prunus laurocerasus L. [≡ Laurocerasus officinalis M.Roem.]	Thompson et al. 1999b	Rosaceae gen. indet.	0	0	0	0	1	1	0	0	1	0	0	0	0	0	0	0	0	0	0	0	0	0	0	0	0	0
Rosales:Rosaceae	Prunus		Prunus pennsylvanica Sarg. [= P. pensylvanica L.f.]	Thompson et al. 1999b	Rosaceae gen. indet.	0	0	0	0	0	0	0	0	1	0	0	0	0	0	0	0	0	0	0	0	0	0	0	0	0	0
Rosales:Rosaceae	Prunus		Prunus salicina Lindl.	Thompson et al. 1999b	Rosaceae gen. indet.	0	0	0	0	1	1	0	0	0	0	0	1	1	0	0	0	0	0	0	0	0	0	0	0	0	0
Rosales:Rosaceae	Prunus		Prunus sargentii Rehder [trad.: Cerasus ~ (~) H.Ohba	Thompson et al. 1999b	Rosaceae gen. indet.	0	0	0	0	0	0	0	0	1	1	0	0	0	0	0	0	0	0	0	0	0	0	0	0	0	0
Rosales:Rosaceae	Prunus		Prunus serotina Ehrh.	Thompson et al. 2001	Rosaceae gen. indet.	0	0	0	0	1	1	0	1	1	0	0	0	0	0	0	0	0	0	0	0	0	0	0	0	0	0
Rosales:Rosaceae	Prunus		Prunus ssiori F.Schmidt [trad.: Padus ~ (~) C.K.Schneid.]	Thompson et al. 1999b	Rosaceae gen. indet.	0	0	0	0	0	0	0	0	1	1	0	0	0	0	1	0	0	0	0	0	0	0	0	0	0	0
Rosales:Rosaceae	Prunus		Prunus virginiana L. [trad. Padus ~ Mill.]	Thompson et al. 1999b	Rosaceae gen. indet.	0	0	0	0	0	1	0	1	1	0	0	0	0	0	0	0	0	0	1	0	0	0	0	0	0	0
Rosales:Rosaceae:Maloideae	Sorbus		Sorbus americana Marshall	GBIF, PDB, FNA, Thompson et al. 2001	Rosaceae gen. indet.	0	0	0	0	1	1	0	1	1	1	0	0	0	0	0	0	0	0	0	0	0	0	0	0	0	0
Rosales:Rosaceae:Maloideae	Sorbus		Sorbus californica Greene	GBIF,FNA,	Rosaceae gen. indet.	0	0	0	0	0	0	0	0	0	0	0	0	0	0	0	0	0	1	1	0	0	0	0	0	0	0
Rosales:Rosaceae:Maloideae	Sorbus		Sorbus decora (Sarg.) Schneid.	GBIF,FNA, Thompson et al. 2001	Rosaceae gen. indet.	0	0	0	0	0	0	0	1	1	1	0	0	0	0	0	0	0	0	0	0	0	0	0	0	0	0
Rosales:Rosaceae:Maloideae	Sorbus		Sorbus scopulina Greene (incl. Var. Sitchensis, var. Grayi)	GBIF,FNA, Thompson et al. 2001	Rosaceae gen. indet.	0	0	0	0	0	1	1	0	1	1	0	0	0	0	0	0	1	1	1	0	1	1	0	0	0	0
Rosales:Rosaceae:Maloideae	Sorbus		Sorbus sitchensis M.Roemer	GBIF, FNA, Thompson et al. 2001	Rosaceae gen. indet.	0	0	0	0	0	1	1	0	1	1	0	0	0	0	0	0	0	1	1	0	1	1	0	0	0	0
Rosales:Rosaceae:Maloideae	Sorbus		Sorbus alnifolia (Siebold & Yucc.) C.Koch (var. alnifolia, var. lobulata, var. angulata)	GBIF, FOC, Fang et al. 2011	Rosaceae gen. indet.	0	0	0	0	1	1	0	0	0	0	0	1	1	1	1	1	0	0	0	0	0	0	0	1	0	0
Rosales:Rosaceae:Maloideae	Sorbus		Sorbus amabilis Cheng ex T.T.Yü & K.C.Kuan	FOC, Fang et al. 2011	Rosaceae gen. indet.	0	0	0	0	1	0	0	0	0	0	0	0	0	0	0	0	0	0	0	0	0	0	0	0	0	0
Rosales:Rosaceae:Maloideae	Sorbus		Sorbus albopilosa T.T.Yu & L.T.Lu	FOC, Fang et al. 2011	Rosaceae gen. indet.	0	0	0	0	0	0	0	0	0	0	0	1	1	0	1	1	0	0	0	0	0	0	1	0	0	0
Rosales:Rosaceae:Maloideae	Sorbus		Sorbus arguta H.Ohashi & H.Iketani	FOC, Fang et al. 2011	Rosaceae gen. indet.	0	0	0	0	0	0	0	0	0	0	0	1	1	0	0	0	0	0	0	0	0	0	0	0	0	0
Rosales:Rosaceae:Maloideae	Sorbus		Sorbus aronioides Rehder	FOC, Fang et al. 2011	Rosaceae gen. indet.	0	0	0	1	1	1	0	0	0	0	0	1	1	0	0	0	0	0	0	0	0	0	0	0	0	0
Rosales:Rosaceae:Maloideae	Sorbus		Sorbus astateria (Cardot) Handel-Manzzetti	FOC, Fang et al. 2011	Rosaceae gen. indet.	0	0	0	0	0	0	0	0	0	0	0	1	1	0	0	0	0	0	0	0	0	0	1	0	0	0
Rosales:Rosaceae:Maloideae	Sorbus		Sorbus caloneura (Stapf) Rehder in Sar. (var. caloneura, var. kwangtungensis)	FOC, Fang et al. 2011	Rosaceae gen. indet.	0	0	0	1	1	1	0	0	0	0	0	1	1	0	0	0	0	0	0	0	0	0	0	0	0	0
Rosales:Rosaceae:Maloideae	Sorbus		Sorbus coronata (Cardot) T.T.Yü & H.T.Tsai (var. glabrescens, var. coronata, var. ambroyzana)	FOC, Fang et al. 2011	Rosaceae gen. indet.	0	0	0	0	1	1	0	0	0	0	0	1	1	0	0	0	0	0	0	0	0	0	0	0	0	0
Rosales:Rosaceae:Maloideae	Sorbus		Sorbus corymbifera (Miquel) N.T.Kh'ep & G.P.Yakovlev	FOC, Fang et al. 2011	Rosaceae gen. indet.	0	1	0	1	1	1	0	0	0	0	0	1	1	0	0	0	0	0	0	0	0	0	0	0	0	0
Rosales:Rosaceae:Maloideae	Sorbus		Sorbus cuspidata (Spach) Hedlund (=?S. thibetica)	FOC, Fang et al. 2011	Rosaceae gen. indet.	0	0	0	0	0	0	0	0	0	0	0	1	1	0	0	1	1	0	0	0	0	0	0	0	0	0
Rosales:Rosaceae:Maloideae	Sorbus		Sorbus discolor (Maxim.) Maxim.	FOC, Fang et al. 2011	Rosaceae gen. indet.	0	0	0	0	0	0	0	0	0	0	0	1	0	1	1	1	0	0	0	0	0	0	0	1	0	0
Rosales:Rosaceae:Maloideae	Sorbus		Sorbus epidendron Handel-Mazzetti	FOC, Fang et al. 2011	Rosaceae gen. indet.	0	0	0	1	1	1	0	0	0	0	0	1	1	0	0	1	0	0	0	0	0	0	0	1	0	0
Rosales:Rosaceae:Maloideae	Sorbus		Sorbus dunnii Rehder	FOC, Fang et al. 2011	Rosaceae gen. indet.	0	0	0	0	1	1	0	0	0	0	0	1	1	0	0	0	0	0	0	0	0	0	0	0	0	0
Rosales:Rosaceae:Maloideae	Sorbus		Sorbus esserteauiana Koehne in Sar.	FOC, Fang et al. 2011	Rosaceae gen. indet.	0	0	0	0	0	0	0	0	0	0	0	1	1	0	0	0	0	0	0	0	0	0	0	0	0	0
Rosales:Rosaceae:Maloideae	Sorbus		Sorbus filipes Hand.-Mazz.	FOC, Fang et al. 2011	Rosaceae gen. indet.	0	0	0	0	0	0	0	0	0	0	0	0	1	0	1	1	0	0	0	0	0	0	0	1	0	0
Rosales:Rosaceae:Maloideae	Sorbus		Sorbus ferrruginea (Wenyig) Rehder in Sar.	FOC, Fang et al. 2011	Rosaceae gen. indet.	0	0	0	1	1	0	0	0	0	0	0	1	1	0	1	1	1	0	0	0	0	0	0	1	0	0
Rosales:Rosaceae:Maloideae	Sorbus		Sorbus folgneri (C.K.Schneider) Rehder in Sar. (var. Folgeri, var duplicatodentata)	FOC, Fang et al. 2011	Rosaceae gen. indet.	0	0	0	0	1	1	0	0	0	0	0	1	1	1	1	1	0	0	0	0	0	0	0	1	0	0
Rosales:Rosaceae:Maloideae	Sorbus		Sorbus foliolosa (Wall.) Spach	FOC, Fang et al. 2011	Rosaceae gen. indet.	0	0	0	0	0	0	0	0	0	0	0	1	1	0	1	1	1	0	0	0	0	0	0	1	0	0
Rosales:Rosaceae:Maloideae	Sorbus		Sorbus globosa T.Tyü & H.T.Tsai) H.Ohashi & H.Iketani	FOC, Fang et al. 2011	Rosaceae gen. indet.	0	0	0	0	1	1	0	0	0	0	0	1	1	0	0	0	0	0	0	0	0	0	0	0	0	0
Rosales:Rosaceae:Maloideae	Sorbus		Sorbus glomerulata Koehne in Sar.	FOC, Fang et al. 2011	Rosaceae gen. indet.	0	0	0	0	1	1	0	0	0	0	0	1	1	0	0	0	0	0	0	0	0	0	0	0	0	0
Rosales:Rosaceae:Maloideae	Sorbus		Sorbus guaxianensis T.C.Ku	FOC, Fang et al. 2011	Rosaceae gen. indet.	0	0	0	0	0	0	0	0	0	0	0	1	0	0	0	0	0	0	0	0	0	0	0	0	0	0
Rosales:Rosaceae:Maloideae	Sorbus		Sorbus helenae Koehne in Sar. (var. Helenae, var. Argutiserrata)	FOC, Fang et al. 2011	Rosaceae gen. indet.	0	0	0	0	0	0	0	0	0	0	0	1	1	0	1	1	0	0	0	0	0	0	0	0	0	0
Rosales:Rosaceae:Maloideae	Sorbus		Sorbus hemsleyi (C.K.Schneid.) Rehder	FOC, Fang et al. 2011	Rosaceae gen. indet.	0	0	0	0	1	1	0	0	0	0	0	1	1	0	0	0	0	0	0	0	0	0	0	0	0	0
Rosales:Rosaceae:Maloideae	Sorbus		Sorbus hupehensis C.K.Schneider (var. Hupehensis, var. Paucijuga)	FOC, Fang et al. 2011	Rosaceae gen. indet.	0	0	0	0	1	1	0	0	0	0	0	1	1	0	1	1	1	0	0	0	0	0	0	1	0	0
Rosales:Rosaceae:Maloideae	Sorbus		Sorbus insignis (Hook) Hedl.	FOC, Fang et al. 2011	Rosaceae gen. indet.	0	0	0	0	0	0	0	0	0	0	0	1	1	0	1	1	1	0	0	0	0	0	0	0	0	0
Rosales:Rosaceae:Maloideae	Sorbus		Sorbus keissleri (C.K.Schneider) Rehder in Sar.	FOC, Fang et al. 2011	Rosaceae gen. indet.	0	0	0	0	1	1	0	0	0	0	0	1	1	0	0	0	0	0	0	0	0	0	0	0	0	0
Rosales:Rosaceae:Maloideae	Sorbus		Sorbus kiukiangensis T.T.Yu (var. Glabrescens, var. Kiukiangensis)	FOC, Fang et al. 2011	Rosaceae gen. indet.	0	0	0	0	0	0	0	0	0	0	0	1	1	0	0	1	0	0	0	0	0	0	0	1	0	0
Rosales:Rosaceae:Maloideae	Sorbus		Sorbus koehneana Schneid.	FOC, Fang et al. 2011	Rosaceae gen. indet.	0	0	0	0	1	1	0	0	0	0	0	1	1	1	1	1	1	0	0	0	0	0	0	1	0	0
Rosales:Rosaceae:Maloideae	Sorbus		Sorbus lanpingensis L.T.Lu	FOC, Fang et al. 2011	Rosaceae gen. indet.	0	0	0	0	0	0	0	0	0	0	0	0	1	0	0	0	0	0	0	0	0	0	0	0	0	0
Rosales:Rosaceae:Maloideae	Sorbus		Sorbus megalocarpa Rehder in Sar. (var. Cuneata, var. Megalocarpa)	FOC, Fang et al. 2011	Rosaceae gen. indet.	0	0	0	0	1	1	0	0	0	0	0	1	1	0	0	0	0	0	0	0	0	0	0	0	0	0
Rosales:Rosaceae:Maloideae	Sorbus		Sorbus meliosmifolia Rehder in Sar. (var. Cuneata, var. Megalocarpa)	FOC, Fang et al. 2011	Rosaceae gen. indet.	0	0	0	1	1	0	0	0	0	0	0	1	1	0	0	0	0	0	0	0	0	0	0	0	0	0
Rosales:Rosaceae:Maloideae	Sorbus		Sorbus monbeigii (Cardot) T.T.Yu	FOC, Fang et al. 2011	Rosaceae gen. indet.	0	0	0	0	0	0	0	0	0	0	0	0	1	0	0	0	0	0	0	0	0	0	0	0	0	0
Rosales:Rosaceae:Maloideae	Sorbus		Sorbus multijuga Koehne in Sar.	FOC, Fang et al. 2011	Rosaceae gen. indet.	0	0	0	0	0	0	0	0	0	0	0	0	1	0	1	1	0	0	0	0	0	0	0	1	0	0
Rosales:Rosaceae:Maloideae	Sorbus		Sorbus ochracea (Hand.-Mazz.) J.E.Vidal	FOC, Fang et al. 2011	Rosaceae gen. indet.	0	0	0	1	0	0	0	0	0	0	0	1	1	0	1	1	0	0	0	0	0	0	0	1	0	0
Rosales:Rosaceae:Maloideae	Sorbus		Sorbus oligodonta (Cardot) Hand.-Mazz.	FOC, Fang et al. 2011	Rosaceae gen. indet.	0	0	0	0	1	0	0	0	0	0	0	1	1	0	1	1	1	0	0	0	0	0	0	1	0	0
Rosales:Rosaceae:Maloideae	Sorbus		Sorbus pallescens Rehder in Sar.	FOC, Fang et al. 2011	Rosaceae gen. indet.	0	0	0	0	0	0	0	0	0	0	0	1	1	0	1	1	0	0	0	0	0	0	0	1	0	0
Rosales:Rosaceae:Maloideae	Sorbus		Sorbus poteriifolia Hand.-Mazz.	FOC, Fang et al. 2011	Rosaceae gen. indet.	0	0	0	0	0	0	0	0	0	0	0	1	1	0	1	1	1	0	0	0	0	0	0	0	0	0
Rosales:Rosaceae:Maloideae	Sorbus		Sorbus pohuashanensis (Hance) Hedl.	FOC, Fang et al. 2011	Rosaceae gen. indet.	0	0	0	0	0	0	0	0	0	0	0	1	1	1	1	1	0	0	0	0	0	0	0	1	0	0
Rosales:Rosaceae:Maloideae	Sorbus		Sorbus prattii Kohne in Sarg. (var. Prattii, var. Aestivalis)	FOC, Fang et al. 2011	Rosaceae gen. indet.	0	0	0	0	1	1	0	0	0	0	0	1	1	0	1	1	1	0	0	0	0	0	0	1	0	0
Rosales:Rosaceae:Maloideae	Sorbus		Sorbus pteridophylla Hand.-Mazz. (var. Pteridophylla, var. Tephroclada)	FOC, Fang et al. 2011	Rosaceae gen. indet.	0	0	0	0	0	0	0	0	0	0	0	0	1	0	1	1	1	0	0	0	0	0	0	1	0	0
Rosales:Rosaceae:Maloideae	Sorbus		Sorbus randaiensios (Hayata) Koidz.	FOC, Fang et al. 2011	Rosaceae gen. indet.	0	0	0	0	1	1	0	0	0	0	0	1	1	0	0	0	0	0	0	0	0	0	0	0	0	0
Rosales:Rosaceae:Maloideae	Sorbus		Sorbus reducta Diels (var. Reducta, var. Pubescens	FOC, Fang et al. 2011	Rosaceae gen. indet.	0	0	0	0	1	1	0	0	0	0	0	1	1	0	0	0	0	0	0	0	0	0	0	1	0	0
Rosales:Rosaceae:Maloideae	Sorbus		Sorbus rehderiana Koehne (var. grosseserrata, var. rehderiana, var. cupreonitens)	FOC, Fang et al. 2011	Rosaceae gen. indet.	0	0	0	0	1	0	0	0	0	0	0	1	1	0	1	1	1	0	0	0	0	0	0	1	0	0
Rosales:Rosaceae:Maloideae	Sorbus		Sorbus rhamnoides (Decne.) Rehder	FOC, Fang et al. 2011	Rosaceae gen. indet.	0	0	0	1	1	1	0	0	0	0	0	1	1	0	0	0	0	0	0	0	0	0	0	1	0	0
Rosales:Rosaceae:Maloideae	Sorbus		Sorbus rhombifolia C.J.Qi & W.Liu	FOC, Fang et al. 2011	Rosaceae gen. indet.	0	0	0	0	1	1	0	0	0	0	0	0	0	0	0	0	0	0	0	0	0	0	0	0	0	0
Rosales:Rosaceae:Maloideae	Sorbus		Sorbus rufopilosa C.K.Schneid. (var. Rufopilosa, stenophylla)	FOC, Fang et al. 2011	Rosaceae gen. indet.	0	0	0	0	1	0	0	0	0	0	0	1	1	0	1	1	1	0	0	0	0	0	0	0	0	0
Rosales:Rosaceae:Maloideae	Sorbus		Sorbus salwinensis T.T.Yu & L.T.Lu	FOC, Fang et al. 2011	Rosaceae gen. indet.	0	0	0	0	0	0	0	0	0	0	0	0	1	0	0	0	0	0	0	0	0	0	0	0	0	0
Rosales:Rosaceae:Maloideae	Sorbus		Sorbus sargentiana Koehne	FOC, Fang et al. 2011	Rosaceae gen. indet.	0	0	0	0	1	1	0	0	0	0	0	1	1	0	0	0	0	0	0	0	0	0	0	0	0	0
Rosales:Rosaceae:Maloideae	Sorbus		Sorbus scalaris Koehne	FOC, Fang et al. 2011	Rosaceae gen. indet.	0	0	0	0	0	0	0	0	0	0	0	1	1	0	0	0	0	0	0	0	0	0	0	0	0	0
Rosales:Rosaceae:Maloideae	Sorbus		Sorbus setschwanensis (C.K.Schneid.) Koehne	FOC, Fang et al. 2011	Rosaceae gen. indet.	0	0	0	0	1	1	0	0	0	0	0	1	1	0	1	1	0	0	0	0	0	0	0	1	0	0
Rosales:Rosaceae:Maloideae	Sorbus		Sorbus tapashana C.K.Schneid.	FOC, Fang et al. 2011	Rosaceae gen. indet.	0	0	0	0	0	0	0	1	1	1	0	1	1	0	1	1	0	0	0	0	0	0	0	1	0	1
Rosales:Rosaceae:Maloideae	Sorbus		Sorbus thibetica (Cardot) Hand.-Mazz.	FOC, Fang et al. 2011	Rosaceae gen. indet.	0	0	0	0	0	0	0	0	0	0	0	1	1	0	1	1	1	0	0	0	0	0	0	0	0	0
Rosales:Rosaceae:Maloideae	Sorbus		Sorbus thomsonii (King ex Hook) Rehder	FOC, Fang et al. 2011	Rosaceae gen. indet.	0	0	0	1	1	1	0	0	0	0	0	1	1	0	0	1	0	0	0	0	0	0	0	1	0	0
Rosales:Rosaceae:Maloideae	Sorbus		Sorbus tianschanica Rupr. (var. Tianschanica, var.integrifoliolata)	FOC, Fang et al. 2011	Rosaceae gen. indet.	0	0	0	0	0	0	0	1	1	1	0	1	1	0	1	1	1	0	0	0	0	0	0	1	0	1
Rosales:Rosaceae:Maloideae	Sorbus		Sorbus tsinlingensis C.L.Tang	FOC, Fang et al. 2011	Rosaceae gen. indet.	0	0	0	0	0	0	0	0	0	0	0	1	1	0	1	1	0	0	0	0	0	0	0	0	0	0
Rosales:Rosaceae:Maloideae	Sorbus		Sorbus vilmorinii C.K.Schneid.	FOC, Fang et al. 2011	Rosaceae gen. indet.	0	0	0	0	0	0	0	0	0	0	0	1	1	0	1	1	1	0	0	0	0	0	0	1	0	0
Rosales:Rosaceae:Maloideae	Sorbus		Sorbus wilsoniana C.K.Schneid.	FOC, Fang et al. 2011	Rosaceae gen. indet.	0	0	0	1	1	1	0	0	0	0	0	1	1	0	0	0	0	0	0	0	0	0	0	0	0	0
Rosales:Rosaceae:Maloideae	Sorbus		Sorbus yunnanensis L.T.Lu	FOC, Fang et al. 2011	Rosaceae gen. indet.	0	0	0	0	0	0	0	0	0	0	0	1	1	0	0	0	0	0	0	0	0	0	0	0	0	0
Rosales:Rosaceae:Maloideae	Sorbus		Sorbus zahlbruckneri C.K.Schneid.	FOC, Fang et al. 2011	Rosaceae gen. indet.	0	0	0	0	1	1	0	0	0	0	0	1	1	0	0	0	0	0	0	0	0	0	0	0	0	0
Rosales:Rosaceae:Maloideae	Sorbus		Sorbus zayuensis T.T.Yu & L.T.Lu	FOC, Fang et al. 2011	Rosaceae gen. indet.	0	0	0	0	0	0	0	0	0	0	0	1	1	0	1	1	0	0	0	0	0	0	0	1	0	0
Rosales:Rosaceae:Maloideae	Sorbus		Sorbus aucuparia L.	DVF, GBIF, Browicz 1982 (1), Caudullo et al. 2017	Rosaceae gen. indet.	0	0	0	0	1	1	1	1	1	1	0	0	0	0	0	0	0	0	1	0	0	0	0	1	0	0
Rosales:Rosaceae:Maloideae	Sorbus		Sorbus domestica L.	GBIF, Browicz 1982, Caudullo et al. 2017	Rosaceae gen. indet.	0	0	0	0	1	1	0	0	1	0	0	0	0	0	0	0	0	1	1	0	0	0	0	1	0	0
Rosales:Rosaceae:Maloideae	Sorbus		Sorbus torminalis (L.) Crantz	GBIF, Browicz 1982, Caudullo et al. 2017	Rosaceae gen. indet.	0	0	0	0	1	1	0	0	1	0	0	0	0	0	0	0	0	1	1	0	0	0	0	0	0	0
Rosales:Rosaceae:Maloideae	Sorbus		Sorbus aria (L.) Crantz	GBIF, Caudullo et al. 2017	Rosaceae gen. indet.	0	0	0	0	1	1	0	0	1	1	0	0	0	0	0	0	0	1	1	0	0	0	0	0	0	0
Rosales:Cannabaceae	Celtis	Afr, Med	Celtis adolfi-frederici Engl. (=Celtis australis L.)	GBIF, Browicz 1982 (1), Caudullo et al. 2017	Celtis sp.	1	1	1	1	1	0	0	0	0	0	0	0	0	0	0	0	0	1	1	0	0	0	0	0	1	0
Rosales:Cannabaceae	Celtis	Afr	Celtis africana Burm. fil.	GBIF	Celtis sp.	0	0	0	1	1	1	0	0	0	0	0	1	1	0	0	0	0	1	1	0	0	0	0	0	0	0
Rosales:Cannabaceae	Celtis	Afr	Celtis bifida Leroy	GBIF	Celtis sp.	0	0	0	1	0	0	0	0	0	0	0	0	0	0	0	0	0	0	0	0	0	0	0	0	1	0
Rosales:Cannabaceae	Celtis	Afr	Celtis gomphophylla Baker	GBIF	Celtis sp.	0	0	1	1	0	0	0	0	0	0	0	1	0	0	0	0	0	0	0	0	0	0	1	0	0	0
Rosales:Cannabaceae	Celtis	Afr	Celtis malagasica Sattarian	GBIF	Celtis sp.	0	0	0	1	0	0	0	0	0	0	0	0	0	0	0	0	0	0	0	0	0	0	1	0	0	0
Rosales:Cannabaceae	Celtis	Afr	Celtis mildbraedii Engl.	GBIF	Celtis sp.	1	1	1	1	0	0	0	0	0	0	0	0	0	0	0	0	0	0	0	0	0	0	0	0	0	0
Rosales:Cannabaceae	Celtis	Afr	Celtis tessmannii Rendle.	GBIF	Celtis sp.	1	1	0	1	0	0	0	0	0	0	0	0	0	0	0	0	0	0	0	0	0	0	0	0	0	0
Rosales:Cannabaceae	Celtis	Afr	Celtis toka (Forssk.) Hepper & J.R.I.Wood	GBIF	Celtis sp.	0	0	0	1	0	0	0	0	0	0	0	0	0	0	0	0	0	0	0	0	0	0	1	0	1	0
Rosales:Cannabaceae	Celtis	Afr	Celtis zenkeri Engl.	GBIF	Celtis sp.	0	1	0	1	0	0	0	0	0	0	0	0	0	0	0	0	0	0	0	0	0	0	0	0	0	0
Rosales:Cannabaceae	Celtis	Asia	Celtis biondii Pamp.	Fang et al. 2011, FOC, GBIF	Celtis sp.	0	0	0	0	1	0	0	0	0	0	0	1	0	0	0	0	0	0	0	0	0	0	0	0	0	0
Rosales:Cannabaceae	Celtis	Asia	Celtis bungeana Blume	Fang et al. 2011, FOC, GBIF	Celtis sp.	0	0	0	0	1	1	0	0	0	0	0	1	1	1	1	0	0	0	0	0	0	0	0	1	0	0
Rosales:Cannabaceae	Celtis	Med	Celtis caucasica Willd.	Browicz 1982 (1), FOP	Celtis sp.	0	0	0	0	1	1	0	0	0	0	0	0	0	0	0	0	0	1	0	0	0	0	0	1	0	0
Rosales:Cannabaceae	Celtis	Asia	Celtis cerasifera C.K.Schneid.	Fang et al. 2011, FOC, GBIF	Celtis sp.	0	0	0	0	1	1	0	0	0	0	0	1	1	0	0	0	0	0	0	0	0	0	0	0	0	0
Rosales:Cannabaceae	Celtis	Asia	Celtis chekiangensis W.C.Cheng	Fang et al. 2011, FOC, GBIF	Celtis sp.	0	0	0	0	1	0	0	0	0	0	0	0	0	0	0	0	0	0	0	0	0	0	0	0	0	0
Rosales:Cannabaceae	Celtis	CA+SA	Celtis brasiliensis (Gardner) Planch.	GBIF,	Celtis sp.	1	1	1	1	1	1	0	0	0	0	0	1	1	0	0	0	0	0	0	0	0	0	1	0	0	0
Rosales:Cannabaceae	Celtis	CA+SA	Celtis chichape (Wedd.) Miq. In Mart.	GBIF,	Celtis sp.	0	0	0	1	1	1	0	0	0	0	0	1	1	0	0	0	0	0	0	0	0	0	1	0	0	0
Rosales:Cannabaceae	Celtis	CA+SA	Celtis iguanea (Jacq.) Sarg.	GBIF,	Celtis sp.	1	1	1	1	1	1	0	0	0	0	0	1	1	0	0	0	0	0	0	0	0	0	1	0	0	0
Rosales:Cannabaceae	Celtis	CA+SA	Celtis schippii Standl.	GBIF,	Celtis sp.	1	1	0	1	0	0	0	0	0	0	0	0	1	0	0	0	0	0	0	0	0	0	0	0	0	0
Rosales:Cannabaceae	Celtis	Asia	Celtis julianae C.K.Schneid.	Fang et al. 2011, FOC, GBIF	Celtis sp.	0	0	0	0	1	1	0	0	0	0	0	1	1	0	0	0	0	0	0	0	0	0	0	0	0	0
Rosales:Cannabaceae	Celtis	Asia	Celtis koraiensis Nakai	Fang et al. 2011, FOC, GBIF	Celtis sp.	0	0	0	0	1	0	0	0	0	0	0	1	1	1	0	0	0	0	0	0	0	0	0	0	0	0
Rosales:Cannabaceae	Celtis	NA	Celtis laevigata Willd.	Thompson et al. 1999 (B), PDB, GBIF, FNA	Celtis sp.	1	0	1	1	1	0	0	0	0	0	0	0	0	0	0	0	0	0	0	0	0	0	0	0	0	0
Rosales:Cannabaceae	Celtis	NA	Celtis lindheimeri Engelm.	FNA, PDB	Celtis sp.	0	0	0	0	1	0	0	0	0	0	0	0	0	0	0	0	0	0	0	0	0	0	0	0	0	0
Rosales:Cannabaceae	Celtis	NA	Celtis occidentalis L.	Thompson et al. 1999 (B), PDB, GBIF, FNA	Celtis sp.	0	0	0	0	1	0	0	1	1	0	0	0	0	0	0	0	0	0	0	0	0	0	0	0	0	0
Rosales:Cannabaceae	Celtis	NA	Celtis pallida Torr. (=C. ehrenbergiana (Klotysch) Liebm.	FNA, PDB, GBIF, CVPM	Celtis sp.	0	0	0	1	1	1	0	0	0	0	0	1	1	0	0	0	0	0	0	0	0	0	1	1	1	0
Rosales:Cannabaceae	Celtis	Asia	Celtis philippensis Blanco	Fang et al. 2011, FOC, GBIF (Drude)	Celtis sp.	1	1	1	1	0	0	0	0	0	0	0	1	0	0	0	0	0	0	0	0	0	0	1	0	0	0
Rosales:Cannabaceae	Celtis	NA	Celtis reticulata Torrey	Thompson et al. 1999 (B), FNA	Celtis sp.	0	0	0	0	1	0	0	0	0	0	0	0	0	0	0	0	0	0	0	0	0	0	1	1	1	0
Rosales:Cannabaceae	Celtis	Asia	Celtis sinensis Pers.	Fang et al. 2011, FOC, GBIF	Celtis sp.	0	0	0	1	1	1	0	0	1	0	0	1	0	0	0	0	0	0	0	0	0	0	0	0	0	0
Rosales:Cannabaceae	Celtis	Asia	Celtis tetrandra Roxb.	Fang et al. 2011, FOC, GBIF, FOP	Celtis sp.	0	1	0	1	1	1	0	0	0	0	0	1	1	0	0	0	0	0	0	0	0	0	0	0	0	0
Rosales:Cannabaceae	Celtis	NA	Celtis tenuifolia Nutt. (=C. pumila in PDB)	FNA, PDB, GBIF, CVPM	Celtis sp.	0	0	0	0	1	0	0	1	0	0	0	0	0	0	0	0	0	0	0	0	0	0	0	0	0	0
Rosales:Cannabaceae	Celtis	Asia	Celtis timorensis Span.	Fang et al. 2011, FOC, GBIF	Celtis sp.	0	1	0	1	1	0	0	0	0	0	0	1	1	0	0	0	0	0	0	0	0	0	0	0	0	0
Rosales:Cannabaceae	Celtis	Med	Celtis tournefortii Lam.	Browicz 1982 (1), GBIF	Celtis sp.	0	0	0	0	0	0	0	0	0	0	0	0	0	0	0	0	0	1	1	1	1	0	0	0	0	0
Rosales:Cannabaceae	Celtis	Asia	Celtis vandervoetiana C.K.Schneid.	Fang et al. 2011, FOC, GBIF	Celtis sp.	0	0	0	0	1	1	0	0	0	0	0	1	1	0	0	0	0	0	0	0	0	0	0	0	0	0
Rosales:Cannabaceae	Pteroceltis	Asia	Pteroceltis tatarinowii Maxim.	Fang et al. 2011, FOC, GBIF	Celtis sp.	0	0	0	0	1	1	0	0	0	0	0	1	1	1	1	0	0	0	0	0	0	0	0	1	0	0
Rosales: Urticaceae vel Moraceae				GBIF		1	1	1	1	1	1	1	1	1	1	0	1	1	1	1	1	1	1	1	1	1	1	1	1	1	1
Rosales:Ulmaceae	Ulmus	Oreoptelea sect. Blepharocarpus	Ulmus americana L.	Thompson et al. 1999 (B), PDB, GBIF, FNA	Ulmus sp.	0	0	0	0	1	1	0	1	1	0	0	0	0	0	0	0	0	0	0	0	0	0	0	0	0	0
Rosales:Ulmaceae	Ulmus	Oreoptelea sect. Blepharocarpus	Ulmus laevis Pall.	GBIF, Caudullo et al. 2017	Ulmus sp.	0	0	0	0	1	1	0	1	1	0	0	0	0	0	0	0	0	0	0	0	0	0	0	0	0	0
Rosales:Ulmaceae	Ulmus	Oreoptelea sect. Chartoptelea	Ulmus alata Michx.	Thompson et al. 1999 (B), PDB, GBIF, FNA	Ulmus sp.	0	0	0	0	1	0	0	0	0	0	0	0	0	0	0	0	0	0	0	0	0	0	0	0	0	0
Rosales:Ulmaceae	Ulmus	Oreoptelea sect. Chartoptelea	Ulmus mexicana (Liebm.) Planch.	GBIF	Ulmus sp.	1	1	0	1	1	1	0	0	0	0	0	1	1	0	0	0	0	0	0	0	0	0	0	0	0	0
Rosales:Ulmaceae	Ulmus	Oreoptelea sect. Trichoptelea	Ulmus crassifolia Nutt.	Thompson et al. 1999 (B), PDB, GBIF, FNA	Ulmus sp.	0	0	0	0	1	0	0	0	0	0	0	0	0	0	0	0	0	0	0	0	0	0	1	0	0	0
Rosales:Ulmaceae	Ulmus	Oreoptelea sect. Trichoptelea	Ulmus serotina Sargent	Thompson et al. 1999 (B), PDB, GBIF, FNA	Ulmus sp.	0	0	0	0	1	1	0	0	0	0	0	1	1	0	0	0	0	0	0	0	0	0	0	0	0	0
Rosales:Ulmaceae	Ulmus	Oreoptelea sect. Trichoptelea	Ulmus thomasii Sarg.	Thompson et al. 1999 (B), PDB, GBIF, FNA	Ulmus sp.	0	0	0	0	1	1	0	1	1	0	0	0	0	0	0	0	0	0	0	0	0	0	0	0	0	0
Rosales:Ulmaceae	Ulmus	Ulmus sect. Lanceifoliae	Ulmus lanceifolia Roxb.	Fang et al. 2011, FOC	Ulmus sp.	0	0	0	1	0	0	0	0	0	0	0	1	1	0	0	0	0	0	0	0	0	0	0	0	0	0
Rosales:Ulmaceae	Ulmus	Ulmus sect. Microptelea	Ulmus parvifolia Jacq.	Fang et al. 2011, FOC	Ulmus sp.	0	0	0	0	1	1	0	0	0	0	0	1	1	1	1	0	0	0	0	0	0	0	0	1	0	0
Rosales:Ulmaceae	Ulmus	Ulmus sect. Ulmus	Ulmus androssowii Litw.	Fang et al. 2011, FOC, GBIF	Ulmus sp.	0	0	0	0	1	1	0	0	0	0	0	1	1	0	0	0	0	0	0	0	0	0	0	0	0	0
Rosales:Ulmaceae	Ulmus	Ulmus sect. Ulmus	Ulmus davidiana Planch.	Fang et al. 2011, FOC, GBIF	Ulmus sp.	0	0	0	0	1	1	0	0	1	1	0	1	1	1	1	0	0	0	0	0	0	0	0	0	0	0
Rosales:Ulmaceae	Ulmus	Ulmus sect. Ulmus	Ulmus glabra Huds.	Browicz 1982 (1), GBIF, Caudullo et al. 2017	Ulmus sp.	0	0	0	0	1	1	0	1	1	1	0	0	0	0	0	0	0	1	1	0	0	0	0	0	0	0
Rosales:Ulmaceae	Ulmus	Ulmus sect. Ulmus	Ulmus glaucescens Franch.	Fang et al. 2011, FOC, GBIF	Ulmus sp.	0	0	0	0	0	0	0	0	0	0	0	1	1	1	1	0	0	0	0	0	0	0	0	1	0	0
Rosales:Ulmaceae	Ulmus	Ulmus sect. Ulmus	Ulmus laciniata Mayr	Fang et al. 2011, FOC, GBIF, FOJ	Ulmus sp.	0	0	0	0	1	1	0	0	1	1	0	1	0	1	1	0	0	0	0	0	0	0	0	1	0	0
Rosales:Ulmaceae	Ulmus	Ulmus sect. Ulmus	Ulmus macrocarpa Hance	Fang et al. 2011, FOC	Ulmus sp.	0	0	0	0	1	1	0	0	0	0	0	1	1	1	1	0	0	0	0	0	0	0	0	1	0	0
Rosales:Ulmaceae	Ulmus	Ulmus sect. Ulmus	Ulmus minor Mill.	Browicz 1982 (1), GBIF, Caudullo et al. 2017	Ulmus sp.	0	0	0	0	1	1	0	1	1	0	0	0	0	0	0	0	0	1	1	1	1	0	0	0	0	0
Rosales:Ulmaceae	Ulmus	Ulmus sect. Ulmus	Ulmus pumila L.	Fang et al. 2011, FOC, GBIF	Ulmus sp.	0	0	0	0	1	1	0	1	1	1	0	1	1	1	1	1	0	0	0	0	0	0	0	1	0	0
Rosales:Ulmaceae	Ulmus	Ulmus sect. Ulmus	Ulmus rubra Muhl.	Thompson et al. 1999 (B), PDB, GBIF, FNA	Ulmus sp.	0	0	0	0	1	1	0	1	1	0	0	0	0	0	0	0	0	0	0	0	0	0	0	0	0	0
Rosales:Ulmaceae	Ulmus	Ulmus sect. Ulmus	Ulmus szechuanica W.P.Fang	Fang et al. 2011, FOC, GBIF	Ulmus sp.	0	0	0	0	1	0	0	0	0	0	0	1	0	0	0	0	0	0	0	0	0	0	0	0	0	0
Rosales:Ulmaceae	Ulmus		Ulmus bergmanniana C.K.Schneid.	Fang et al. 2011, FOC, GBIF	Ulmus sp.	0	0	0	0	1	1	0	0	0	0	0	1	1	0	0	0	0	0	0	0	0	0	0	0	0	0
Rosales:Ulmaceae	Ulmus		Ulmus castaneifolia Hemsl.	Fang et al. 2011, FOC, GBIF	Ulmus sp.	0	0	0	0	1	1	0	0	0	0	0	1	0	0	0	0	0	0	0	0	0	0	0	0	0	0
Rosales:Ulmaceae	Ulmus		Ulmus changii W.C.Cheng	Fang et al. 2011, FOC, GBIF	Ulmus sp.	0	0	0	0	1	1	0	0	0	0	0	1	1	0	0	0	0	0	0	0	0	0	0	0	0	0
Rosales:Ulmaceae	Ulmus		Ulmus elongata L.K.Fu & C.S.Ding	Fang et al. 2011, FOC, GBIF	Ulmus sp.	0	0	0	0	1	0	0	0	0	0	0	0	0	0	0	0	0	0	0	0	0	0	0	0	0	0
Rosales:Ulmaceae	Ulmus		Ulmus lamellosa C.Wang & S.L.Chang	Fang et al. 2011, FOC, GBIF	Ulmus sp.	0	0	0	0	0	0	0	0	0	0	0	1	0	0	0	0	0	0	0	0	0	0	0	1	0	0
Rosales:Ulmaceae	Ulmus		Ulmus microcarpa L.K.Fu	Fang et al. 2011, FOC	Ulmus sp.	0	0	0	0	0	0	0	0	0	0	0	1	1	0	0	0	0	0	0	0	0	0	0	0	0	0
Rosales:Ulmaceae	Ulmus		Ulmus prunifolia W.C.Cheng & L.K.-Fu	Fang et al. 2011, FOC	Ulmus sp.	0	0	0	0	1	1	0	0	0	0	0	1	0	0	0	0	0	0	0	0	0	0	0	0	0	0
Rosales:Ulmaceae	Ulmus		Ulmus uyematsui Hayata	Fang et al. 2011, FOC, GBIF	Ulmus sp.	0	0	0	0	1	1	1	0	0	0	0	1	1	0	0	0	0	0	0	0	0	0	0	0	0	0
Rosales:Ulmaceae	Ulmus		Ulmus wallichiana Planch.	FOP, GBIF, Browicz 1982 (1)	Ulmus sp.	0	0	0	0	1	1	0	0	1	0	0	1	0	0	0	0	0	0	0	0	0	0	0	0	0	0
Rosales:Ulmaceae	Zelkova		Zelkova abelicea (Lam.) Boiss.	GBIF	Zelkova sp.	0	0	0	0	0	0	0	0	0	0	0	0	0	0	0	0	0	1	1	0	0	0	0	0	0	0
Rosales:Ulmaceae	Zelkova		Zelkova carpinifolia (Pallas) K.Koch	Browicz 1982 (1), GBIF	Zelkova sp.	0	0	0	0	1	1	0	0	0	0	0	0	0	0	0	0	0	1	0	1	1	0	0	0	0	0
Rosales:Ulmaceae	Zelkova		Zelkova schneideriana Hand.-Mazz.	Fang et al. 2011, FOC, GBIF	Zelkova sp.	0	0	0	0	1	1	0	0	0	0	0	1	1	0	0	0	0	0	0	0	0	0	0	0	0	0
Rosales:Ulmaceae	Zelkova		Zelkova serrata (Thunb.) Makino	Fang et al. 2011, FOC, GBIF	Zelkova sp.	0	0	0	0	1	1	0	0	1	0	0	1	1	0	1	1	0	0	0	0	0	0	0	0	0	0
Rosales:Ulmaceae	Zelkova		Zelkova sicula Di Pasquale & al.	GBIF	Zelkova sp.	0	0	0	0	0	0	0	0	0	0	0	0	0	0	0	0	0	1	0	0	0	0	0	0	0	0
Rosales:Ulmaceae	Zelkova		Zelkova sinica C.K.Schneid.	Fang et al. 2011, FOC, GBIF	Zelkova sp.	0	0	0	0	1	1	0	0	0	0	0	1	1	1	1	0	0	0	0	0	0	0	0	0	0	0
Fagales:Betulaceae:Betuloideae	Alnus	[not in Leopold et al. 2012]	Alnus faurei H.Lév. & Vaniot	FOJ, GBIF	Alnus sp.	0	0	0	0	1	1	0	0	1	0	0	0	0	0	0	0	0	0	0	0	0	0	0	0	0	0
Fagales:Betulaceae:Betuloideae	Alnus	[not in Leopold et al. 2012]	Alnus lanata Duthie ex Bean	Fang et al. 2011, FOC, GBIF	Alnus sp.	0	0	0	0	0	0	0	0	0	0	0	0	1	0	0	0	0	0	0	0	0	0	0	0	0	0
Fagales:Betulaceae:Betuloideae	Alnus	[not in Leopold et al. 2012]	Alnus serrulatoides Callier	FOJ, GBIF	Alnus sp.	0	0	0	0	1	0	0	0	0	0	0	0	0	0	0	0	0	0	0	0	0	0	0	0	0	0
Fagales:Betulaceae:Betuloideae	Alnus	Alnobetula	Alnus firma Siebold & Zucc.	FOJ, GBIF	Alnus sp.	0	0	0	0	1	1	0	0	1	0	0	0	0	0	0	0	0	0	0	0	0	0	0	0	0	0
Fagales:Betulaceae:Betuloideae	Alnus	Alnobetula	Alnus mandschurica (Callier) Hand.-Mazz.	Fang et al. 2011, FOC, GBIF	Alnus sp.	0	0	0	0	0	0	0	0	0	0	0	0	0	1	1	1	0	0	0	0	0	0	0	0	0	0
Fagales:Betulaceae:Betuloideae	Alnus	Alnobetula	Alnus maximowiczii Callier	FOJ, GBIF	Alnus sp.	0	0	0	0	1	1	0	0	1	1	0	0	0	0	0	0	0	0	0	0	0	0	0	0	0	0
Fagales:Betulaceae:Betuloideae	Alnus	Alnobetula	Alnus pendula Matsum.	FOJ, GBIF	Alnus sp.	0	0	0	0	1	1	0	0	1	0	0	0	0	0	0	0	0	0	0	0	0	0	0	0	0	0
Fagales:Betulaceae:Betuloideae	Alnus	Alnobetula	Alnus sieboldiana Matsum.	FOJ, GBIF	Alnus sp.	0	0	0	0	1	1	0	0	0	0	0	0	0	0	0	0	0	0	0	0	0	0	0	0	0	0
Fagales:Betulaceae:Betuloideae	Alnus	Alnobetula	Alnus viridis (Chaix) DC. [= A. alnobetula subsp. alnobetula]	Thompson et al. 1999 (B), PDB, GBIF, FNA	Alnus sp.	0	0	0	0	1	1	1	1	1	1	0	0	0	0	0	0	0	0	1	0	1	1	0	0	0	0
Fagales:Betulaceae:Betuloideae	Alnus	Alnus	Alnus acuminata Kunth	GBIF	Alnus sp.	0	0	0	1	0	1	0	0	0	0	0	1	1	0	0	0	0	0	0	0	0	0	0	0	0	0
Fagales:Betulaceae:Betuloideae	Alnus	Alnus	Alnus cordata (Loisel.) Duby	GBIF	Alnus sp.	0	0	0	0	0	0	0	0	0	0	0	0	0	0	0	0	0	1	1	0	0	0	0	0	0	0
Fagales:Betulaceae:Betuloideae	Alnus	Alnus	Alnus cremastogyne Burkill	Fang et al. 2011, FOC, GBIF	Alnus sp.	0	0	0	0	1	1	0	0	0	0	0	1	1	0	0	1	0	0	0	0	0	0	0	0	0	0
Fagales:Betulaceae:Betuloideae	Alnus	Alnus	Alnus ferdinandi-coburgii C.K.Schneid.	Fang et al. 2011, GBIF	Alnus sp.	0	0	0	0	0	0	0	0	0	0	0	1	1	0	0	0	0	0	0	0	0	0	0	0	0	0
Fagales:Betulaceae:Betuloideae	Alnus	Alnus	Alnus glutinosa (L.) Gaertn.	GBIF, Browicz 1982 (1)	Alnus sp.	0	0	0	0	1	1	0	0	1	1	0	0	0	0	0	0	0	1	1	0	0	0	0	0	0	0
Fagales:Betulaceae:Betuloideae	Alnus	Alnus	Alnus hirsuta Turcz. ex Rupr.	Fang et al. 2011, FOC, GBIF	Alnus sp.	0	0	0	0	1	1	0	0	1	1	0	1	0	1	1	1	0	0	0	0	0	0	0	0	0	0
Fagales:Betulaceae:Betuloideae	Alnus	Alnus	Alnus incana (L.) Moench.	Thompson et al. 1999 (B), PDB, GBIF, FNA	Alnus sp.	0	0	0	0	1	1	0	1	1	1	0	0	0	0	0	0	0	1	1	0	1	1	0	1	0	0
Fagales:Betulaceae:Betuloideae	Alnus	Alnus	Alnus japonica (Thunb.) Steud.	Fang et al. 2011, FOC, FOJ, GBIF	Alnus sp.	0	0	0	0	1	1	0	0	1	0	0	1	0	1	1	0	0	0	0	0	0	0	0	0	0	0
Fagales:Betulaceae:Betuloideae	Alnus	Alnus	Alnus matsumurae Callier	FOJ, GBIF	Alnus sp.	0	0	0	0	1	0	0	0	1	0	0	0	0	0	0	0	0	0	0	0	0	0	0	0	0	0
Fagales:Betulaceae:Betuloideae	Alnus	Alnus	Alnus nepalensis D.Don	Fang et al. 2011, FOC, GBIF	Alnus sp.	0	0	0	1	1	1	0	0	0	0	0	1	1	0	0	0	0	0	0	0	0	0	0	0	0	0
Fagales:Betulaceae:Betuloideae	Alnus	Alnus	Alnus oblongifolia Torr.	Thompson et al. 1999 (B), PDB, GBIF, FNA	Alnus sp.	0	0	0	0	1	1	0	0	0	0	0	1	1	0	0	0	0	1	1	0	0	0	1	1	0	0
Fagales:Betulaceae:Betuloideae	Alnus	Alnus	Alnus orientalis Decne.	Browicz 1982 (1), GBIF	Alnus sp.	0	0	0	0	0	0	0	0	0	0	0	0	0	0	0	0	0	1	1	0	0	0	0	0	0	0
Fagales:Betulaceae:Betuloideae	Alnus	Alnus	Alnus rhombifolia Nutt.	Thompson et al. 1999 (B), PDB, GBIF, FNA	Alnus sp.	0	0	0	0	0	1	0	0	1	0	0	0	0	0	0	0	0	1	1	0	0	0	0	1	0	0
Fagales:Betulaceae:Betuloideae	Alnus	Alnus	Alnus rubra Bong.	Thompson et al. 1999 (B), PDB, GBIF, FNA	Alnus sp.	0	0	0	0	0	1	1	0	1	1	0	0	0	0	0	0	0	0	1	0	1	1	0	0	0	0
Fagales:Betulaceae:Betuloideae	Alnus	Alnus	Alnus serrulata (Aiton) Willd.	Thompson et al. 1999 (B), PDB, GBIF, FNA	Alnus sp.	0	0	0	0	1	1	0	1	1	0	0	0	0	0	0	0	0	0	0	0	0	0	0	0	0	0
Fagales:Betulaceae:Betuloideae	Alnus	Alnus	Alnus subcordata C.A.Mey	Browicz 1982 (1), GBIF	Alnus sp.	0	0	0	0	1	0	0	0	0	0	0	0	0	0	0	0	0	1	0	0	0	0	0	1	0	0
Fagales:Betulaceae:Betuloideae	Alnus	Alnus	Alnus trabeculosa Hand.-Mazz.	Fang et al. 2011, FOC, GBIF	Alnus sp.	0	0	0	0	1	0	0	0	0	0	0	1	1	0	0	0	0	0	0	0	0	0	0	0	0	0
Fagales:Betulaceae:Betuloideae	Alnus	Clethropsis	Alnus formosana (Burkill) Makino	Fang et al. 2011, FOC, GBIF	Alnus sp.	0	0	0	0	1	1	0	0	0	0	0	1	1	0	0	0	0	0	0	0	0	0	0	0	0	0
Fagales:Betulaceae:Betuloideae	Alnus	Clethropsis	Alnus maritima (Marshall) Muhl. ex Nutt.	Thompson et al. 1999 (B), PDB, GBIF, FNA	Alnus sp.	0	0	0	0	1	0	0	0	0	0	0	0	0	0	0	0	0	0	0	0	0	0	0	0	0	0
Fagales:Betulaceae:Betuloideae	Alnus	Clethropsis	Alnus nitida (Spach) Endl.	Fang et al. 2011, FOC, GBIF	Alnus sp.	0	0	0	0	1	1	0	0	0	0	0	0	0	0	0	0	0	0	0	0	0	0	0	0	0	0
Fagales:Betulaceae:Betuloideae	Betula		Betula albosinensis Burkill		Betula sp.	0	0	0	0	0	1	0	0	0	0	0	0	1	1	0	0	0	0	0	0	0	0	0	0	0	0
Fagales:Betulaceae:Betuloideae	Betula		Betula alleghaniensis Britton		Betula sp.	0	0	0	0	0	1	0	0	1	0	0	0	0	0	0	0	0	0	0	0	0	0	0	0	0	0
Fagales:Betulaceae:Betuloideae	Betula		Betula alnoides Buch.-Ham. ex D.Don		Betula sp.	0	0	0	0	1	0	0	0	0	0	0	1	0	0	0	0	0	0	0	0	0	0	0	0	0	0
Fagales:Betulaceae:Betuloideae	Betula		Betula apoiensis Nakai ex H.Hara		Betula sp.	0	0	0	0	0	0	0	0	1	0	0	0	0	0	0	0	0	0	0	0	0	0	0	0	0	0
Fagales:Betulaceae:Betuloideae	Betula		Betula calcicola (W.W.Sm.) P.C.Li		Betula sp.	0	0	0	0	0	0	0	0	0	0	0	0	1	0	0	0	0	0	0	0	0	0	0	0	0	0
Fagales:Betulaceae:Betuloideae	Betula		Betula chichibuensis H.Hara		Betula sp.	0	0	0	0	0	0	0	0	1	0	0	0	0	0	0	0	0	0	0	0	0	0	0	0	0	0
Fagales:Betulaceae:Betuloideae	Betula		Betula chinensis Maxim.		Betula sp.	0	0	0	0	0	0	0	0	0	0	0	0	1	0	1	0	0	0	0	0	0	0	0	0	0	0
Fagales:Betulaceae:Betuloideae	Betula		Betula corylifolia Regel & Maxim.		Betula sp.	0	0	0	0	0	1	0	0	1	0	0	0	0	0	0	0	0	0	0	0	0	0	0	0	0	0
Fagales:Betulaceae:Betuloideae	Betula		Betula costata Trautv.		Betula sp.	0	0	0	0	0	0	0	0	1	1	0	0	0	1	1	0	0	0	0	0	0	0	0	0	0	0
Fagales:Betulaceae:Betuloideae	Betula		Betula cylindrostachya Lindl. ex Wall.		Betula sp.	0	0	0	0	0	0	0	0	0	0	0	1	1	0	0	0	0	0	0	0	0	0	0	0	0	0
Fagales:Betulaceae:Betuloideae	Betula		Betula dahurica Pall.		Betula sp.	0	0	0	0	0	0	0	0	1	1	0	0	0	1	1	0	0	0	0	0	0	0	0	0	0	0
Fagales:Betulaceae:Betuloideae	Betula		Betula delavayi Franch.		Betula sp.	0	0	0	0	0	0	0	0	0	0	0	0	0	0	1	1	0	0	0	0	0	0	0	0	0	0
Fagales:Betulaceae:Betuloideae	Betula		Betula divaricata Ledeb.		Betula sp.	0	0	0	0	0	0	0	0	1	1	0	0	0	0	1	1	0	0	0	0	0	0	0	0	0	0
Fagales:Betulaceae:Betuloideae	Betula		Betula ermanii Cham.		Betula sp.	0	0	0	0	0	0	0	0	0	1	0	0	0	0	1	1	0	0	0	0	0	0	0	0	0	0
Fagales:Betulaceae:Betuloideae	Betula		Betula fruticosa Pall.		Betula sp.	0	0	0	0	0	0	0	0	0	0	0	0	0	0	1	1	0	0	0	0	0	0	0	0	0	0
Fagales:Betulaceae:Betuloideae	Betula		Betula glandulosa Michx.		Betula sp.	0	0	0	0	0	0	0	0	1	1	0	0	0	0	0	0	0	0	0	0	1	1	0	0	0	0
Fagales:Betulaceae:Betuloideae	Betula		Betula globispica Shirai		Betula sp.	0	0	0	0	0	1	0	0	1	0	0	0	0	0	0	0	0	0	0	0	0	0	0	0	0	0
Fagales:Betulaceae:Betuloideae	Betula		Betula grossa Siebold & Zucc.		Betula sp.	0	0	0	0	1	1	0	0	0	0	0	0	0	0	0	0	0	0	0	0	0	0	0	0	0	0
Fagales:Betulaceae:Betuloideae	Betula		Betula halophila Ching		Betula sp.	0	0	0	0	0	0	0	0	0	1	0	0	0	0	0	0	0	0	0	0	0	0	0	0	0	0
Fagales:Betulaceae:Betuloideae	Betula		Betula humilis Schrank		Betula sp.	0	0	0	0	0	0	0	0	0	0	1	0	0	0	0	1	1	0	0	0	0	0	0	0	0	0
Fagales:Betulaceae:Betuloideae	Betula		Betula insignis Franch.		Betula sp.	0	0	0	0	0	1	0	0	1	0	0	0	0	0	0	0	0	0	0	0	0	0	0	0	0	0
Fagales:Betulaceae:Betuloideae	Betula		Betula jinpingensis P.C.Li		Betula sp.	0	0	0	0	1	0	0	0	0	0	0	0	0	0	0	0	0	0	0	0	0	0	0	0	0	0
Fagales:Betulaceae:Betuloideae	Betula		Betula jiulungensis P.C.Li ex Q.Lin		Betula sp.	0	0	0	0	0	0	0	0	0	0	0	0	1	0	0	0	0	0	0	0	0	0	0	0	0	0
Fagales:Betulaceae:Betuloideae	Betula		Betula kenaica W.H.Evans		Betula sp.	0	0	0	0	0	0	0	0	0	1	0	0	0	0	0	0	0	0	0	0	0	0	0	0	0	0
Fagales:Betulaceae:Betuloideae	Betula		Betula lanata (Regel) V.N.Vassil.		Betula sp.	0	0	0	0	0	0	0	0	0	1	0	0	0	0	0	0	0	0	0	0	0	0	0	0	0	0
Fagales:Betulaceae:Betuloideae	Betula		Betula lenta L.		Betula sp.	0	0	0	0	0	1	0	0	1	0	0	0	0	0	0	0	0	0	0	0	0	0	0	0	0	0
Fagales:Betulaceae:Betuloideae	Betula		Betula litwinowii Doluch.		Betula sp.	0	0	0	0	0	1	0	0	1	1	0	0	0	0	0	0	0	0	0	0	0	0	0	0	0	0
Fagales:Betulaceae:Betuloideae	Betula		Betula luminifera H.J.P.Winkl.		Betula sp.	0	0	0	0	1	1	0	0	0	0	0	0	1	0	0	0	0	0	0	0	0	0	0	0	0	0
Fagales:Betulaceae:Betuloideae	Betula		Betula maximowicziana Regel		Betula sp.	0	0	0	0	0	0	0	0	1	0	0	0	0	0	0	0	0	0	0	0	0	0	0	0	0	0
Fagales:Betulaceae:Betuloideae	Betula		Betula medwediewii Regel		Betula sp.	0	0	0	0	0	0	1	0	0	1	0	0	0	0	0	0	0	0	0	0	0	0	0	0	0	0
Fagales:Betulaceae:Betuloideae	Betula		Betula michauxii Spach		Betula sp.	0	0	0	0	0	0	0	0	1	1	0	0	0	0	0	0	0	0	0	0	0	0	0	0	0	0
Fagales:Betulaceae:Betuloideae	Betula		Betula microphylla Bunge		Betula sp.	0	0	0	0	0	0	0	0	1	0	0	0	0	0	0	0	0	0	0	0	0	0	0	0	0	0
Fagales:Betulaceae:Betuloideae	Betula		Betula minor (Tuck.) Fernald		Betula sp.	0	0	0	0	0	0	0	0	1	1	0	0	0	0	0	0	0	0	0	0	0	0	0	0	0	0
Fagales:Betulaceae:Betuloideae	Betula		Betula nana L.		Betula sp.	0	0	0	0	0	0	1	0	0	1	0	0	0	0	0	0	1	0	0	0	0	0	0	0	0	0
Fagales:Betulaceae:Betuloideae	Betula		Betula neoalaskana Sarg.		Betula sp.	0	0	0	0	0	0	0	0	0	1	0	0	0	0	0	0	1	0	0	0	0	1	0	0	0	0
Fagales:Betulaceae:Betuloideae	Betula		Betula nigra L.		Betula sp.	0	0	0	0	1	0	0	1	0	0	0	0	0	0	0	0	0	0	0	0	0	0	0	0	0	0
Fagales:Betulaceae:Betuloideae	Betula		Betula occidentalis Hook.		Betula sp.	0	0	0	0	0	0	0	0	1	1	0	0	0	0	0	0	0	0	0	0	1	0	0	0	0	0
Fagales:Betulaceae:Betuloideae	Betula		Betula ovalifolia Rupr.		Betula sp.	0	0	0	0	0	0	0	0	0	0	0	0	0	0	1	0	0	0	0	0	0	0	0	0	0	0
Fagales:Betulaceae:Betuloideae	Betula		Betula papyrifera Marshall		Betula sp.	0	0	0	0	0	0	0	0	1	1	0	0	0	0	0	0	0	0	0	0	0	0	0	0	0	0
Fagales:Betulaceae:Betuloideae	Betula		Betula paramushirensis Barkalov		Betula sp.	0	0	0	0	0	0	0	0	0	1	0	0	0	0	0	0	1	0	0	0	0	0	0	0	0	0
Fagales:Betulaceae:Betuloideae	Betula		Betula pendula Roth		Betula sp.	0	0	0	0	0	1	0	0	1	1	0	0	1	0	1	0	0	0	0	0	0	0	0	0	0	0
Fagales:Betulaceae:Betuloideae	Betula		Betula platyphylla Sukaczev		Betula sp.	0	0	0	0	0	0	0	0	1	1	0	0	0	0	1	1	0	0	0	0	0	0	0	0	0	0
Fagales:Betulaceae:Betuloideae	Betula		Betula populifolia Marshall		Betula sp.	0	0	0	0	1	1	0	1	1	0	0	0	0	0	0	0	0	0	0	0	0	0	0	0	0	0
Fagales:Betulaceae:Betuloideae	Betula		Betula potaninii Batalin		Betula sp.	0	0	0	0	0	0	0	0	0	0	0	0	1	0	0	0	0	0	0	0	0	0	0	0	0	0
Fagales:Betulaceae:Betuloideae	Betula		Betula pubescens Ehrh.		Betula sp.	0	0	0	0	0	1	1	0	1	1	0	0	0	0	0	0	0	0	0	0	0	0	0	0	0	0
Fagales:Betulaceae:Betuloideae	Betula		Betula pumila L.		Betula sp.	0	0	0	0	0	0	0	0	1	1	0	0	0	0	0	0	0	0	1	0	1	0	0	0	0	0
Fagales:Betulaceae:Betuloideae	Betula		Betula raddeana Trautv.		Betula sp.	0	0	0	0	0	0	0	0	1	0	0	0	0	0	0	0	0	0	0	0	0	0	0	0	0	0
Fagales:Betulaceae:Betuloideae	Betula		Betula schmidtii Regel		Betula sp.	0	0	0	0	0	0	0	0	1	0	0	0	0	0	1	0	0	0	0	0	0	0	0	0	0	0
Fagales:Betulaceae:Betuloideae	Betula		Betula tianschanica Rupr.		Betula sp.	0	0	0	0	0	0	0	0	0	1	0	0	0	0	0	0	0	0	0	0	0	0	0	0	0	0
Fagales:Betulaceae:Betuloideae	Betula		Betula utilis D.Don		Betula sp.	0	0	0	0	0	0	0	0	0	0	0	0	0	0	1	1	0	0	0	0	0	0	0	0	0	0
Fagales:Betulaceae:Coryloideae	Carpinus		Carpinus betulus L.	Browicz 1982 (1), GBIF	Caprinus sp.	0	0	0	0	1	1	0	0	0	0	0	0	0	0	0	0	0	1	0	0	0	0	0	0	0	0
Fagales:Betulaceae:Coryloideae	Carpinus		Carpinus caroliniana Walter	Thompson et al. 1999 (B), PDB, GBIF, FNA	Caprinus sp.	0	1	1	1	1	1	0	1	1	0	0	1	0	0	0	0	0	0	0	0	0	0	0	0	0	0
Fagales:Betulaceae:Coryloideae	Carpinus		Carpinus chuniana Hu	Fang et al. 2011, FOC, GBIF	Caprinus sp.	0	0	0	0	1	0	0	0	0	0	0	0	0	0	0	0	0	0	0	0	0	0	0	0	0	0
Fagales:Betulaceae:Coryloideae	Carpinus		Carpinus cordata Blume	Fang et al. 2011, FOC, FOJ, GBIF	Caprinus sp.	0	0	0	0	1	1	0	0	1	0	0	1	1	1	1	1	0	0	0	0	0	0	0	0	0	0
Fagales:Betulaceae:Coryloideae	Carpinus		Carpinus dayongiana K.W.Liu & Q.Z.Lin	Fang et al. 2011, FOC, GBIF	Caprinus sp.	0	0	0	0	1	1	0	0	0	0	0	1	1	0	0	0	0	0	0	0	0	0	0	0	0	0
Fagales:Betulaceae:Coryloideae	Carpinus		Carpinus faginea Lindl.	GBIF	Caprinus sp.	0	0	0	0	0	0	0	0	0	0	0	0	1	0	0	0	0	0	0	0	0	0	0	0	0	0
Fagales:Betulaceae:Coryloideae	Carpinus		Carpinus fangiana Hu	Fang et al. 2011, FOC, GBIF	Caprinus sp.	0	0	0	0	1	1	0	0	0	0	0	1	1	0	0	0	0	0	0	0	0	0	0	0	0	0
Fagales:Betulaceae:Coryloideae	Carpinus		Carpinus fargesiana H.J.P.Winkl.	Fang et al. 2011, FOC, GBIF	Caprinus sp.	0	0	0	0	1	1	0	0	0	0	0	1	1	0	0	0	0	0	0	0	0	0	0	0	0	0
Fagales:Betulaceae:Coryloideae	Carpinus		Carpinus hebestroma Yamam.	Fang et al. 2011, FOC, GBIF	Caprinus sp.	0	0	0	0	1	1	0	0	0	0	0	0	0	0	0	0	0	0	0	0	0	0	0	0	0	0
Fagales:Betulaceae:Coryloideae	Carpinus		Carpinus henryana H.J.P.Winkl.	Fang et al. 2011, FOC, GBIF	Caprinus sp.	0	0	0	0	1	1	0	0	0	0	0	1	1	0	0	0	0	0	0	0	0	0	0	0	0	0
Fagales:Betulaceae:Coryloideae	Carpinus		Carpinus hupeana Hu	Fang et al. 2011, FOC, GBIF	Caprinus sp.	0	0	0	0	1	1	0	0	0	0	0	1	1	0	0	0	0	0	0	0	0	0	0	0	0	0
Fagales:Betulaceae:Coryloideae	Carpinus		Carpinus japonica Blume	FOJ, GBIF	Caprinus sp.	0	0	0	0	1	1	0	0	1	0	0	0	0	0	0	0	0	0	0	0	0	0	0	0	0	0
Fagales:Betulaceae:Coryloideae	Carpinus		Carpinus kawakamii Hayata	Fang et al. 2011, FOC, GBIF	Caprinus sp.	0	0	0	0	1	1	1	0	0	0	0	1	1	0	0	0	0	0	0	0	0	0	0	0	0	0
Fagales:Betulaceae:Coryloideae	Carpinus		Carpinus kweichouensis Hu	Fang et al. 2011, FOC, GBIF	Caprinus sp.	0	0	0	0	1	1	0	0	0	0	0	1	1	0	0	0	0	0	0	0	0	0	0	0	0	0
Fagales:Betulaceae:Coryloideae	Carpinus		Carpinus laxiflora (Siebold & Zucc.) Blume	Fang et al. 2011, FOC, GBIF	Caprinus sp.	0	0	0	0	1	1	0	0	1	0	0	0	0	0	0	0	0	0	0	0	0	0	0	0	0	0
Fagales:Betulaceae:Coryloideae	Carpinus		Carpinus londoniana H.G.P.Winkl.	Fang et al. 2011, FOC, GBIF	Caprinus sp.	0	0	0	1	1	1	0	0	0	0	0	1	1	0	0	0	0	0	0	0	0	0	0	0	0	0
Fagales:Betulaceae:Coryloideae	Carpinus		Carpinus microphylla Z.C.Chen ex Y.S.Wang & J.P.Huang	Fang et al. 2011, FOC, GBIF	Caprinus sp.	0	0	0	0	0	1	0	0	0	0	0	1	1	0	0	0	0	0	0	0	0	0	0	0	0	0
Fagales:Betulaceae:Coryloideae	Carpinus		Carpinus mollicoma Hu	Fang et al. 2011, FOC, GBIF	Caprinus sp.	0	0	0	0	1	0	0	0	0	0	0	0	1	0	0	0	0	0	0	0	0	0	0	0	0	0
Fagales:Betulaceae:Coryloideae	Carpinus		Carpinus monbeigiana Hand.-Manz.	Fang et al. 2011, FOC, GBIF	Caprinus sp.	0	0	0	0	0	0	0	0	0	0	0	1	1	0	0	0	0	0	0	0	0	0	0	0	0	0
Fagales:Betulaceae:Coryloideae	Carpinus		Carpinus omeiensis Hu & W.P.Fang	Fang et al. 2011, FOC, GBIF	Caprinus sp.	0	0	0	0	1	1	0	0	0	0	0	1	1	0	0	0	0	0	0	0	0	0	0	0	0	0
Fagales:Betulaceae:Coryloideae	Carpinus		Carpinus orientalis Mill.	Browicz 1982 (1), GBIF	Caprinus sp.	0	0	0	0	1	1	0	0	0	0	0	0	0	0	0	0	0	1	0	0	0	0	0	0	0	0
Fagales:Betulaceae:Coryloideae	Carpinus		Carpinus polyneura Franch.	Fang et al. 2011, FOC, GBIF	Caprinus sp.	0	0	0	1	1	1	0	0	0	0	0	1	1	0	0	0	0	0	0	0	0	0	0	0	0	0
Fagales:Betulaceae:Coryloideae	Carpinus		Carpinus pubescens Burkill	Fang et al. 2011, FOC, GBIF	Caprinus sp.	0	0	0	0	1	1	0	0	0	0	0	1	1	0	0	0	0	0	0	0	0	0	0	0	0	0
Fagales:Betulaceae:Coryloideae	Carpinus		Carpinus purpurinervis Hu	Fang et al. 2011, FOC, GBIF	Caprinus sp.	0	0	0	0	1	1	0	0	0	0	0	1	1	0	0	0	0	0	0	0	0	0	0	0	0	0
Fagales:Betulaceae:Coryloideae	Carpinus		Carpinus putoensis W.C.Cheng	Fang et al. 2011, FOC, GBIF	Caprinus sp.	0	0	0	0	1	0	0	0	0	0	0	0	0	0	0	0	0	0	0	0	0	0	0	0	0	0
Fagales:Betulaceae:Coryloideae	Carpinus		Carpinus rankanensis Hayata	Fang et al. 2011, FOC, GBIF	Caprinus sp.	0	0	0	0	1	1	1	0	0	0	0	0	1	0	0	0	0	0	0	0	0	0	0	0	0	0
Fagales:Betulaceae:Coryloideae	Carpinus		Carpinus rupestris A.Camus	Fang et al. 2011, FOC, GBIF	Caprinus sp.	0	0	0	0	1	0	0	0	0	0	0	1	1	0	0	0	0	0	0	0	0	0	0	0	0	0
Fagales:Betulaceae:Coryloideae	Carpinus		Carpinus shensiensis Hu	Fang et al. 2011, FOC, GBIF	Caprinus sp.	0	0	0	0	1	1	0	0	0	0	0	1	1	0	0	0	0	0	0	0	0	0	0	0	0	0
Fagales:Betulaceae:Coryloideae	Carpinus		Carpinus tientaiensis W.C.Cheng	Fang et al. 2011, FOC, GBIF	Caprinus sp.	0	0	0	0	1	0	0	0	0	0	0	0	0	0	0	0	0	0	0	0	0	0	0	0	0	0
Fagales:Betulaceae:Coryloideae	Carpinus		Carpinus tropicalis (Donn.Sm) Lundell	GBIF	Caprinus sp.	0	1	1	1	1	1	0	0	0	0	0	1	1	0	0	0	0	0	0	0	0	0	0	0	0	0
Fagales:Betulaceae:Coryloideae	Carpinus		Carpinus tsaiana Hu	Fang et al. 2011, FOC, GBIF	Caprinus sp.	0	0	0	0	1	0	0	0	0	0	0	1	0	0	0	0	0	0	0	0	0	0	0	0	0	0
Fagales:Betulaceae:Coryloideae	Carpinus		Carpinus tschonoskii Maxim.	Fang et al. 2011, FOC, GBIF	Caprinus sp.	0	0	0	0	1	1	0	0	0	0	0	1	1	0	0	0	0	0	0	0	0	0	0	0	0	0
Fagales:Betulaceae:Coryloideae	Carpinus		Carpinus turczaninowii Hance	Fang et al. 2011, FOC, FOJ, GBIF	Caprinus sp.	0	0	0	0	1	1	0	0	0	0	0	1	1	1	1	1	0	0	0	0	0	0	0	0	0	0
Fagales:Betulaceae:Coryloideae	Carpinus		Carpinus viminea Lindl.	Fang et al. 2011, FOC, GBIF	Caprinus sp.	0	0	0	0	1	1	0	0	0	0	0	1	0	0	0	0	0	0	0	0	0	0	0	0	0	0
Fagales:Betulaceae:Coryloideae	Corylus		Corylus americana Walter		Corylus sp.	0	0	0	0	1	1	0	1	1	0	0	0	0	0	0	0	0	0	0	0	0	0	0	0	0	0
Fagales:Betulaceae:Coryloideae	Corylus		Corylus avellana L.		Corylus sp.	0	0	0	0	1	1	0	0	1	0	0	0	0	0	0	0	0	0	0	0	0	0	0	0	0	0
Fagales:Betulaceae:Coryloideae	Corylus		Corylus chinensis Franch.		Corylus sp.	0	0	0	0	0	1	0	0	0	0	0	0	1	0	0	0	0	0	0	0	0	0	0	0	0	0
Fagales:Betulaceae:Coryloideae	Corylus		Corylus colurna L.		Corylus sp.	0	0	0	0	0	1	0	0	0	0	0	0	0	0	0	0	0	0	1	0	0	0	0	0	0	0
Fagales:Betulaceae:Coryloideae	Corylus		Corylus cornuta Marshall		Corylus sp.	0	0	0	0	0	1	0	0	1	0	0	0	0	0	0	0	0	0	0	0	1	0	0	0	0	0
Fagales:Betulaceae:Coryloideae	Corylus		Corylus fargesii C.K.Schneid.		Corylus sp.	0	0	0	0	0	1	0	0	0	0	0	0	1	0	0	0	0	0	0	0	0	0	0	0	0	0
Fagales:Betulaceae:Coryloideae	Corylus		Corylus ferox Wall.		Corylus sp.	0	0	0	0	0	1	0	0	0	0	0	0	1	0	0	0	0	0	0	0	0	0	0	0	0	0
Fagales:Betulaceae:Coryloideae	Corylus		Corylus heterophylla Fisch. ex Besser		Corylus sp.	0	0	0	0	0	1	0	0	1	0	0	1	1	1	1	0	0	0	0	0	0	0	0	0	0	0
Fagales:Betulaceae:Coryloideae	Corylus		Corylus jacquemontii Decne.		Corylus sp.	0	0	0	0	0	1	0	0	0	0	0	0	1	0	0	0	0	0	1	0	0	0	0	0	0	0
Fagales:Betulaceae:Coryloideae	Corylus		Corylus maxima Mill.		Corylus sp.	0	0	0	0	0	1	0	0	1	0	0	0	0	0	0	0	0	0	0	0	0	0	0	0	0	0
Fagales:Betulaceae:Coryloideae	Corylus		Corylus sieboldiana Blume		Corylus sp.	0	0	0	0	1	1	0	0	1	0	0	0	0	0	0	0	0	0	0	0	0	0	0	0	0	0
Fagales:Betulaceae:Coryloideae	Corylus		Corylus wangii Hu		Corylus sp.	0	0	0	0	0	0	0	0	0	0	0	0	1	0	0	0	0	0	0	0	0	0	0	0	0	0
Fagales:Betulaceae:Coryloideae	Corylus		Corylus yunnanensis (Franch.) A.Camus		Corylus sp.	0	0	0	0	0	0	0	0	0	0	0	0	1	0	0	0	0	0	0	0	0	0	0	0	0	0
Fagales:Betulaceae:Coryloideae	Ostrya	EURA	Ostrya carpinifolia Scop.	Browicz 1982 (1), GBIF, Caudullo et al. 2017	Ostrya sp.	0	0	0	0	1	1	0	0	0	0	0	0	0	0	0	0	0	1	1	0	0	0	0	0	0	0
Fagales:Betulaceae:Coryloideae	Ostrya	NA	Ostrya chisosensis Correll	PDB, GBIF, FNA	Ostrya sp.	0	0	0	0	0	0	0	0	0	0	0	0	0	0	0	0	0	0	0	0	0	0	1	0	1	0
Fagales:Betulaceae:Coryloideae	Ostrya	EAsia	Ostrya japonica Sarg.	Fang et al. 2011, FOC, FOJ, GBIF	Ostrya sp.	0	0	0	0	1	1	0	0	1	0	0	1	1	1	1	0	0	0	0	0	0	0	0	0	0	0
Fagales:Betulaceae:Coryloideae	Ostrya	NA	Ostrya knowltonii Sarg.	Thompson et al. 1999 (B), PDB, GBIF, FNA	Ostrya sp.	0	0	0	0	0	0	0	0	0	0	0	0	0	0	0	0	0	1	1	0	0	0	0	1	0	1
Fagales:Betulaceae:Coryloideae	Ostrya	EAsia	Ostrya multinervis Rehder	Fang et al. 2011, FOC, GBIF	Ostrya sp.	0	0	0	0	1	1	0	0	0	0	0	0	1	0	0	0	0	0	0	0	0	0	0	0	0	0
Fagales:Betulaceae:Coryloideae	Ostrya	EAsia	Ostrya rehderiana Chun	Fang et al. 2011, FOC, GBIF	Ostrya sp.	0	0	0	0	1	0	0	0	0	0	0	0	0	0	0	0	0	0	0	0	0	0	0	0	0	0
Fagales:Betulaceae:Coryloideae	Ostrya	EAsia	Ostrya trichocarpa D.Fang & Y.S.Wang	Fang et al. 2011, FOC, GBIF	Ostrya sp.	0	0	0	0	0	0	0	0	0	0	0	1	0	0	0	0	0	0	0	0	0	0	0	0	0	0
Fagales:Betulaceae:Coryloideae	Ostrya	NA	Ostrya virginiana (Mill.) K.Koch	Thompson et al. 1999 (B), PDB, GBIF, FNA	Ostrya sp.	0	0	0	1	1	1	0	1	1	0	0	1	1	0	0	0	0	0	0	0	0	0	0	0	0	0
Fagales:Betulaceae:Coryloideae	Ostrya	EAsia	Ostrya yunnanensis W.K.Hu	Fang et al. 2011, FOC, GBIF	Ostrya sp.	0	0	0	0	0	0	0	0	0	0	0	0	1	0	0	0	0	0	0	0	0	0	0	0	0	0
Fagales:Fagaceae/Castanoideae	Castanea		Castanea crenata Sieb. & Zucc.	FOJ, FOC, GBIF	Castanoideae indet.	0	0	0	0	1	1	0	0	1	0	0	0	0	0	0	0	0	0	0	0	0	0	0	0	0	0
Fagales:Fagaceae/Castanoideae	Castanea		Castanea dentata (Marshall) Borkh.	Thompson et al. 1999 (B), PDB, GBIF, FNA	Castanoideae indet.	0	0	0	0	1	1	0	1	1	0	0	0	0	0	0	0	0	0	0	0	0	0	0	0	0	0
Fagales:Fagaceae/Castanoideae	Castanea		Castanea henryi (Skan) Rehder & E.H.Wilson	Fang et al. 2011, FOC, GBIF	Castanoideae indet.	0	0	0	0	1	1	0	0	0	0	0	1	1	0	0	0	0	0	0	0	0	0	0	0	0	0
Fagales:Fagaceae/Castanoideae	Castanea		Castanea mollissima Blume	Fang et al. 2011, FOC, GBIF	Castanoideae indet.	0	0	0	0	1	1	0	0	0	0	0	1	1	1	1	0	0	0	0	0	0	0	0	0	0	0
Fagales:Fagaceae/Castanoideae	Castanea		Castanea ozarkensis Ashe	Thompson et al. 1999 (B), PDB, GBIF, FNA	Castanoideae indet.	0	0	0	0	1	0	0	0	0	0	0	0	0	0	0	0	0	0	0	0	0	0	0	0	0	0
Fagales:Fagaceae/Castanoideae	Castanea		Castanea pumila Mill.	Thompson et al. 1999 (B), PDB, GBIF, FNA	Castanoideae indet.	0	0	0	0	1	1	0	0	0	0	0	0	0	0	0	0	0	0	0	0	0	0	0	0	0	0
Fagales:Fagaceae/Castanoideae	Castanea		Castanea sativa Mill.	Browicz 1982 (1), GBIF, Caudullo et al. 2017	Castanoideae indet.	0	0	0	0	1	1	0	0	0	0	0	0	0	0	0	0	0	1	1	0	0	0	0	0	0	0
Fagales:Fagaceae/Castanoideae	Castanea		Castanea seguinii Dode	Fang et al. 2011, FOC, GBIF	Castanoideae indet.	0	0	0	0	1	1	0	0	0	0	0	0	1	1	1	0	0	0	0	0	0	0	0	0	0	0
Fagales:Fagaceae/Castanoideae	Lithocarpus			GBIF	Castanoideae indet.	1	1	0	1	1	1	1	0	0	0	0	1	1	0	0	0	0	0	0	0	0	0	0	0	0	0
Fagales:Fagaceae/Castanoideae	Castanopsis			GBIF	Castanoideae indet.	1	1	0	1	1	1	1	0	0	0	0	1	1	0	0	0	0	0	0	0	0	0	0	0	0	0
Fagales:Fagaceae/Castanoideae	Notholithocarpus			GBIF	Castanoideae indet.	0	0	0	0	0	0	0	0	0	0	0	0	0	0	0	0	0	0	1	0	0	0	0	0	0	0
Fagales:Fagaceae	Fagus	Clade Engleriana	Fagus engleriana Seemen	Fang et al. 2011, FOC, GBIF	Fagus sp.	0	0	0	0	1	1	0	0	0	0	0	1	1	0	0	0	0	0	0	0	0	0	0	0	0	0
Fagales:Fagaceae	Fagus	Clade Engleriana	Fagus japonica Maxim.	GBIF, FOJ	Fagus sp.	0	0	0	0	1	1	0	0	1	0	0	0	0	0	0	0	0	0	0	0	0	0	0	0	0	0
Fagales:Fagaceae	Fagus	Clade Engleriana	Fagus okamotoi Shen	Flora od Japan	Fagus sp.	0	0	0	0	0	1	0	0	0	0	0	0	0	0	0	0	0	0	0	0	0	0	0	0	0	0
Fagales:Fagaceae	Fagus	Clade Fagus	Fagus crenata Blume	GBIF, FOJ	Fagus sp.	0	0	0	0	1	1	0	0	1	0	0	0	0	0	0	0	0	0	0	0	0	0	0	0	0	0
Fagales:Fagaceae	Fagus	Clade Fagus	Fagus grandifolia Ehrhart	Thompson et al. 1999 (B), PDB, GBIF, FNA	Fagus sp.	0	0	0	0	1	1	0	1	1	0	0	0	0	0	0	0	0	0	0	0	0	0	0	0	0	0
Fagales:Fagaceae	Fagus	Clade Fagus	Fagus hayatae Palib.	Fang et al. 2011, FOC, GBIF	Fagus sp.	0	0	0	0	1	1	0	0	0	0	0	1	1	0	0	0	0	0	0	0	0	0	0	0	0	0
Fagales:Fagaceae	Fagus	Clade Fagus	Fagus longipetiolata Seemen	Fang et al. 2011, FOC, GBIF	Fagus sp.	0	0	0	0	1	1	0	0	0	0	0	1	1	0	0	0	0	0	0	0	0	0	0	0	0	0
Fagales:Fagaceae	Fagus	Clade Fagus	Fagus lucida Rehder & E.H.Wilson	Fang et al. 2011, FOC, GBIF	Fagus sp.	0	0	0	0	1	1	0	0	0	0	0	1	0	0	0	0	0	0	0	0	0	0	0	0	0	0
Fagales:Fagaceae	Fagus	Clade Fagus	Fagus sylvatica L. (s.l.)	Browicz 1982 (1), GBIF, Caudullo et al. 2017	Fagus sp.	0	0	0	0	1	1	0	0	1	0	0	0	0	0	0	0	0	1	1	0	0	0	0	0	0	0
Fagales:Fagaceae	Quercus	Section Cerris	Quercus acutissima Carruth.	Fang et al. 2011, FOC, GBIF	Quercus sect. Cerris	0	0	0	1	1	1	0	0	0	0	0	1	1	1	0	0	0	0	0	0	0	0	0	1	0	0
Fagales:Fagaceae	Quercus	Section Cerris	Quercus afares Pomel	GBIF	Quercus sect. Cerris	0	0	0	0	0	0	0	0	0	0	0	0	0	0	0	0	0	1	0	0	0	0	0	0	1	0
Fagales:Fagaceae	Quercus	Section Cerris	Quercus brantii Lindl.	Browicz 1982 (1), GBIF	Quercus sect. Cerris	0	0	0	0	0	0	0	0	0	0	0	0	0	0	0	0	0	1	0	1	0	0	0	0	0	0
Fagales:Fagaceae	Quercus	Section Cerris	Quercus castaneifolia C.A.Mey.	Browicz 1982 (1), GBIF	Quercus sect. Cerris	0	0	0	0	1	1	0	0	1	0	0	0	0	0	0	0	0	1	0	0	0	0	0	0	0	0
Fagales:Fagaceae	Quercus	Section Cerris	Quercus cerris L.	Browicz 1982 (1), GBIF, FOI, Caudullo 2017	Quercus sect. Cerris	0	0	0	0	1	1	0	0	0	0	0	0	0	0	0	0	0	1	1	0	0	0	0	0	0	0
Fagales:Fagaceae	Quercus	Section Cerris	Quercus chenii Nakai	Fang et al. 2011, FOC, GBIF	Quercus sect. Cerris	0	0	0	0	1	0	0	0	0	0	0	1	0	0	0	0	0	0	0	0	0	0	0	0	0	0
Fagales:Fagaceae	Quercus	Section Cerris	Quercus ithaburensis Decne.	GBIF	Quercus sect. Cerris	0	0	0	0	0	0	0	0	0	0	0	0	0	0	0	0	0	1	0	0	0	0	0	0	0	0
Fagales:Fagaceae	Quercus	Section Cerris	Quercus libani Oliv.	Browicz 1982 (1), GBIF, FOI	Quercus sect. Cerris	0	0	0	0	0	0	0	0	0	0	0	0	0	0	0	0	0	1	1	1	1	0	0	0	0	0
Fagales:Fagaceae	Quercus	Section Cerris	Quercus suber L.	GBIF, Caudullo et al. 2017	Quercus sect. Cerris	0	0	0	0	1	1	0	0	0	0	0	0	0	0	0	0	0	1	1	0	0	0	0	0	0	0
Fagales:Fagaceae	Quercus	Section Cerris	Quercus trojana Webb	Browicz 1982 (1), GBIF	Quercus sect. Cerris	0	0	0	0	1	1	0	0	0	0	0	0	0	0	0	0	0	1	1	0	0	0	0	0	0	0
Fagales:Fagaceae	Quercus	Section Cerris	Quercus variabilis Blume	Fang et al. 2011, FOC, GBIF	Quercus sect. Cerris	0	0	0	0	1	1	0	0	0	0	0	1	1	1	1	0	0	0	0	0	0	0	0	0	0	0
Fagales:Fagaceae	Quercus	Section Ilex	Quercus acrodonta Seemen	Fang et al. 2011, FOC, GBIF	Quercus sect. Ilex	0	0	0	0	1	1	0	0	0	0	0	1	1	0	0	0	0	0	0	0	0	0	0	0	0	0
Fagales:Fagaceae	Quercus	Section Ilex	Quercus alnifolia Poech	Browicz 1982 (1), GBIF	Quercus sect. Ilex	0	0	0	0	0	0	0	0	0	0	0	0	0	0	0	0	0	1	0	0	0	0	0	0	0	0
Fagales:Fagaceae	Quercus	Section Ilex	Quercus aquifolioides Rehder & E.H.Wilson	Fang et al. 2011, FOC, GBIF	Quercus sect. Ilex	0	0	0	0	1	1	0	0	0	0	0	1	1	0	1	1	0	0	0	0	0	0	0	0	0	0	too few geo-referenced points
Fagales:Fagaceae	Quercus	Section Ilex	Quercus aucheri Jaub. & Spach	GBIF	Quercus sect. Ilex	0	0	0	0	0	0	0	0	0	0	0	0	0	0	0	0	0	1	0	0	0	0	0	0	0	0
Fagales:Fagaceae	Quercus	Section Ilex	Quercus baloot Griff.	Browicz 1982 (1), GBIF	Quercus sect. Ilex	0	0	0	0	1	1	0	0	1	0	0	1	1	0	0	0	0	0	1	0	0	0	0	0	0	0
Fagales:Fagaceae	Quercus	Section Ilex	Quercus baroni Skan	Fang et al. 2011, FOC, GBIF	Quercus sect. Ilex	0	0	0	0	1	1	0	0	0	0	0	1	1	0	0	0	0	0	0	0	0	0	0	0	0	0
Fagales:Fagaceae	Quercus	Section Ilex	Quercus coccifera L.	Browicz 1982 (1), GBIF, Caudullo et al. 2017, FOI	Quercus sect. Ilex	0	0	0	0	1	1	0	0	0	0	0	0	0	0	0	0	0	1	1	0	0	0	0	1	0	0
Fagales:Fagaceae	Quercus	Section Ilex	Quercus cocciferoides Hand.-Mazz.	Fang et al. 2011, FOC, GBIF	Quercus sect. Ilex	0	0	0	0	0	0	0	0	0	0	0	1	1	0	0	0	0	0	0	0	0	0	0	0	0	0
Fagales:Fagaceae	Quercus	Section Ilex	Quercus dolicholepis A.Camus	Fang et al. 2011, FOC, GBIF	Quercus sect. Ilex	0	0	0	0	1	1	0	0	0	0	0	1	1	0	0	0	0	0	0	0	0	0	0	0	0	0
Fagales:Fagaceae	Quercus	Section Ilex	Quercus engleriana Seemen	Fang et al. 2011, FOC, GBIF	Quercus sect. Ilex	0	0	0	0	1	1	0	0	0	0	0	1	1	0	0	0	0	0	0	0	0	0	0	0	0	0
Fagales:Fagaceae	Quercus	Section Ilex	Quercus floribunda Lindl. ex Wall.	FOP, GBIF	Quercus sect. Ilex	0	0	0	0	1	1	0	0	1	0	0	1	1	0	1	0	0	0	0	0	1	0	0	0	0	0
Fagales:Fagaceae	Quercus	Section Ilex	Quercus franchetii Skan	Fang et al. 2011, FOC, GBIF	Quercus sect. Ilex	0	0	0	0	0	0	0	0	0	0	0	1	1	0	0	0	0	0	0	0	0	0	0	0	0	0
Fagales:Fagaceae	Quercus	Section Ilex	Quercus gilliana Rehder & E.H.Wilson	GBIF	Quercus sect. Ilex	0	0	0	0	1	0	0	0	0	0	0	1	1	0	0	0	0	0	0	0	0	0	0	0	0	0
Fagales:Fagaceae	Quercus	Section Ilex	Quercus guajavifolia H.Lév	Fang et al. 2011, FOC, GBIF	Quercus sect. Ilex	0	0	0	0	0	0	0	0	0	0	0	0	1	0	1	0	0	0	0	0	0	0	0	0	0	0
Fagales:Fagaceae	Quercus	Section Ilex	Quercus handeliana A.Camus	GBIF	Quercus sect. Ilex	0	0	0	0	0	0	0	0	0	0	0	0	1	0	0	0	0	0	0	0	0	0	0	0	0	0	too few geo-referenced points
Fagales:Fagaceae	Quercus	Section Ilex	Quercus ilex L.	Browicz 1982 (1), GBIF, Caudullo et al. 2017	Quercus sect. Ilex	0	0	0	0	1	1	0	0	0	0	0	0	0	0	0	0	0	1	1	0	0	0	0	1	0	0
Fagales:Fagaceae	Quercus	Section Ilex	Quercus kingiana Craib	Fang et al. 2011, FOC, GBIF	Quercus sect. Ilex	0	0	0	1	0	0	0	0	0	0	0	1	0	0	0	0	0	0	0	0	0	0	0	0	0	0
Fagales:Fagaceae	Quercus	Section Ilex	Quercus lanata Sm. (=Quercus leucotrichophora A.Camus ex Bahadur)	Fang et al. 2011, FOC, GBIF	Quercus sect. Ilex	0	0	0	0	0	0	0	0	0	0	0	1	1	0	0	0	0	0	0	0	0	0	0	0	0	0
Fagales:Fagaceae	Quercus	Section Ilex	Quercus lodicosa O.E.Warburg	Fang et al. 2011, FOC, GBIF	Quercus sect. Ilex	0	0	0	0	0	0	0	0	0	0	0	0	1	0	0	0	0	0	0	0	0	0	0	0	0	0
Fagales:Fagaceae	Quercus	Section Ilex	Quercus longispica A.Camus	GBIF	Quercus sect. Ilex	0	0	0	0	0	0	0	0	0	0	0	1	1	0	0	0	0	0	0	0	0	0	0	0	0	0
Fagales:Fagaceae	Quercus	Section Ilex	Quercus marlipoensis Hu & W.C.Cheng in Hu	Fang et al. 2011, FOC, GBIF	Quercus sect. Ilex	0	0	0	0	0	0	0	0	0	0	0	1	0	0	0	0	0	0	0	0	0	0	0	0	0	0
Fagales:Fagaceae	Quercus	Section Ilex	Quercus monimotricha Hand.-Mazz.	Fang et al. 2011, FOC, GBIF	Quercus sect. Ilex	0	0	0	0	0	0	0	0	0	0	0	1	1	0	0	0	0	0	0	0	0	0	0	0	0	0
Fagales:Fagaceae	Quercus	Section Ilex	Quercus oxyphylla (E.H.Wilson) Hand.-Mazz.	Fang et al. 2011, FOC, GBIF	Quercus sect. Ilex	0	0	0	0	1	1	0	0	0	0	0	1	1	0	0	0	0	0	0	0	0	0	0	0	0	0
Fagales:Fagaceae	Quercus	Section Ilex	Quercus phillyreoides A.Gray	Fang et al. 2011, FOC, GBIF	Quercus sect. Ilex	0	0	0	0	1	0	0	0	0	0	0	1	1	0	0	0	0	0	0	0	0	0	0	0	0	0
Fagales:Fagaceae	Quercus	Section Ilex	Quercus rehderiana Hand.-Mazz.	Fang et al. 2011, FOC, GBIF	Quercus sect. Ilex	0	0	0	0	0	0	0	0	0	0	0	1	1	0	1	1	0	0	0	0	0	0	0	0	0	0
Fagales:Fagaceae	Quercus	Section Ilex	Quercus semecarpifolia Sm.	Fang et al. 2011, FOC, GBIF, FOP	Quercus sect. Ilex	0	0	0	0	1	1	0	0	1	0	0	1	1	0	1	0	0	0	1	0	0	0	0	0	0	0
Fagales:Fagaceae	Quercus	Section Ilex	Quercus senescens Hand.-Mazz.	Fang et al. 2011, FOC, GBIF	Quercus sect. Ilex	0	0	0	0	0	0	0	0	0	0	0	0	1	0	0	0	0	0	0	0	0	0	0	0	0	0
Fagales:Fagaceae	Quercus	Section Ilex	Quercus setulosa Hickel & A.Camus	Fang et al. 2011, FOC, GBIF	Quercus sect. Ilex	0	0	0	1	1	0	0	0	0	0	0	1	0	0	0	0	0	0	0	0	0	0	0	0	0	0
Fagales:Fagaceae	Quercus	Section Ilex	Quercus spinosa David ex Franch.	Fang et al. 2011, FOC, GBIF	Quercus sect. Ilex	0	0	0	0	1	1	0	0	0	0	0	1	1	0	0	0	0	0	0	0	0	0	0	0	0	0
Fagales:Fagaceae	Quercus	Section Ilex	Quercus tarokensis Hayata	Fang et al. 2011, FOC, GBIF	Quercus sect. Ilex	0	0	0	0	1	1	0	0	0	0	0	0	1	0	0	0	0	0	0	0	0	0	0	0	0	0
Fagales:Fagaceae	Quercus	Section Ilex	Quercus tungmaiensis Z.T.Chang	Deng et al. 2015	Quercus sect. Ilex	0	0	0	0	0	0	0	0	0	0	0	1	1	0	0	0	0	0	0	0	0	0	0	0	0	0
Fagales:Fagaceae	Quercus	Section Ilex	Quercus utilis Nakai	Fang et al. 2011, FOC, GBIF	Quercus sect. Ilex	0	0	0	0	0	0	0	0	0	0	0	1	0	0	0	0	0	0	0	0	0	0	0	0	0	0
Fagales:Fagaceae	Quercus	Section Quercus	Quercus ajoensis C.H.Mull.	Thompson et al. 1999 (B), PDB, GBIF, FNA	Quercus sect Quercus vel Lobatae	0	0	0	0	0	0	0	0	0	0	0	0	0	0	0	0	0	0	0	0	0	0	0	1	1	0
Fagales:Fagaceae	Quercus	Section Quercus	Quercus aculicingensis Trel.	GBIF, OOTW	Quercus sect Quercus vel Lobatae	0	0	0	0	1	1	0	0	0	0	0	0	0	0	0	0	0	0	0	0	0	0	0	0	0	0
Fagales:Fagaceae	Quercus	Section Quercus	Quercus deserticola Trel (=Q. Alpescens Trel.)	GBIF, OOTW	Quercus sect Quercus vel Lobatae	0	0	0	0	0	0	0	0	0	0	0	1	1	0	0	0	0	0	0	0	0	0	1	0	0	0
Fagales:Fagaceae	Quercus	Section Quercus	Quercus peduncularis Nee (Q. arachnoidea Trel.)	GBIF, OOTW	Quercus sect Quercus vel Lobatae	0	1	1	1	1	1	0	0	0	0	0	1	1	0	0	0	0	0	0	0	0	0	1	0	0	0
Fagales:Fagaceae	Quercus	Section Quercus	Quercus austrina Small	GBIF, FNA, PDB	Quercus sect Quercus vel Lobatae	0	0	0	0	1	0	0	0	0	0	0	0	0	0	0	0	0	0	0	0	0	0	0	0	0	0
Fagales:Fagaceae	Quercus	Section Quercus	Quercus alba L.	Thompson et al. 1999 (B), PDB, GBIF, FNA	Quercus sect Quercus vel Lobatae	0	0	0	0	1	1	0	1	1	0	0	0	0	0	0	0	0	0	0	0	0	0	0	0	0	0
Fagales:Fagaceae	Quercus	Section Quercus	Quercus aliena Blume	Fang et al. 2011, FOC, GBIF, OOTW	Quercus sect Quercus vel Lobatae	0	0	0	0	1	1	0	0	0	0	0	1	1	1	1	0	0	0	0	0	0	0	0	0	0	0
Fagales:Fagaceae	Quercus	Section Quercus	Quercus arizonica Sarg.	Thompson et al. 1999 (B), PDB, GBIF, FNA	Quercus sect Quercus vel Lobatae	0	0	0	0	0	0	0	0	0	0	0	1	1	0	0	0	0	1	0	0	0	0	1	1	0	0
Fagales:Fagaceae	Quercus	Section Quercus	Quercus berberidifolia Liebm.	GBIF, FNA, PDB	Quercus sect Quercus vel Lobatae	0	0	0	0	0	0	0	0	0	0	0	0	0	0	0	0	0	1	1	0	0	0	0	1	0	0
Fagales:Fagaceae	Quercus	Section Quercus	Quercus bicolor Willd.	Thompson et al. 1999 (B), PDB, GBIF, FNA	Quercus sect Quercus vel Lobatae	0	0	0	0	1	1	0	1	1	0	0	0	0	0	0	0	0	0	0	0	0	0	0	0	0	0
Fagales:Fagaceae	Quercus	Section Quercus	Quercus boyntonii Beadle	GBIF, FNA, PDB	Quercus sect Quercus vel Lobatae	0	0	0	0	1	0	0	0	0	0	0	0	0	0	0	0	0	0	0	0	0	0	0	0	0	0
Fagales:Fagaceae	Quercus	Section Quercus	Quercus chapmanii Sarg.	Thompson et al. 1999 (B), PDB, GBIF, FNA	Quercus sect Quercus vel Lobatae	1	1	0	1	1	0	0	0	0	0	0	0	0	0	0	0	0	0	0	0	0	0	0	0	0	0
Fagales:Fagaceae	Quercus	Section Quercus	Quercus chartaceae Trel.	GBIF	Quercus sect Quercus vel Lobatae	0	0	0	0	0	0	0	0	0	0	0	1	0	0	0	0	0	0	0	0	0	0	0	0	0	0
Fagales:Fagaceae	Quercus	Section Quercus	Quercus glaucescens Bonpl. (Q. chinantlensis Liebm.)	GBIF	Quercus sect Quercus vel Lobatae	0	1	1	1	1	1	0	0	0	0	0	1	1	0	0	0	0	0	0	0	0	0	0	0	0	0
Fagales:Fagaceae	Quercus	Section Quercus	Quercus chuhuichupensis C.H.Mull.	GBIF	Quercus sect Quercus vel Lobatae	0	0	0	0	0	0	0	0	0	0	0	1	0	0	0	0	0	0	0	0	0	0	0	0	0	0
Fagales:Fagaceae	Quercus	Section Quercus	Quercus chihuahuensis Trel.	GBIF, FNA, PDB	Quercus sect Quercus vel Lobatae	0	0	1	0	0	0	0	0	0	0	0	1	1	0	0	0	0	0	0	0	0	0	1	1	0	0
Fagales:Fagaceae	Quercus	Section Quercus	Quercus laeta Liebm. (Q.clivicola Trel. & C.H.Mull.)	GBIF, OOTW	Quercus sect Quercus vel Lobatae	0	0	0	1	1	1	0	0	0	0	0	1	1	0	0	0	0	0	0	0	0	0	1	1	0	0
Fagales:Fagaceae	Quercus	Section Quercus	Quercus congesta Presl	GBIF, OOTW	Quercus sect Quercus vel Lobatae	0	0	0	0	0	0	0	0	0	0	0	0	0	0	0	0	0	1	1	0	0	0	0	0	0	0
Fagales:Fagaceae	Quercus	Section Quercus	Quercus convallata Trel.	GBIF, OOTW	Quercus sect Quercus vel Lobatae	1	0	0	1	0	1	0	0	0	0	0	1	1	0	0	0	0	0	0	0	0	0	0	0	0	0
Fagales:Fagaceae	Quercus	Section Quercus	Quercus copeyensis C.H.Mull.	GBIF, OOTW	Quercus sect Quercus vel Lobatae	1	0	1	1	1	0	0	0	0	0	0	0	0	0	0	0	0	0	0	0	0	0	0	0	0	0
Fagales:Fagaceae	Quercus	Section Quercus	Quercus cornelius-mulleri Nixon & K.P.Steele	GBIF, OOTW	Quercus sect Quercus vel Lobatae	0	0	0	0	0	0	0	0	0	0	0	0	0	0	0	0	0	1	1	0	0	0	0	1	1	0
Fagales:Fagaceae	Quercus	Section Quercus	Quercus corrugata Hook.	GBIF, OOTW	Quercus sect Quercus vel Lobatae	1	1	0	0	1	1	0	0	0	0	0	0	1	0	0	0	0	0	0	0	0	0	0	0	0	0
Fagales:Fagaceae	Quercus	Section Quercus	Quercus depressipes Trel.	GBIF, OOTW, FNA, PDB	Quercus sect Quercus vel Lobatae	0	0	0	0	0	0	0	0	0	0	0	1	1	0	0	0	0	0	0	0	0	0	1	1	0	0
Fagales:Fagaceae	Quercus	Section Quercus	Quercus diversifolia Née	GBIF, OOTW, FNA, PDB	Quercus sect Quercus vel Lobatae	0	1	0	0	1	1	0	0	0	0	0	1	1	0	0	0	0	0	0	0	0	0	0	1	0	0
Fagales:Fagaceae	Quercus	Section Quercus	Quercus dentata Thunb.	Fang et al. 2011, FOC, GBIF, OOTW	Quercus sect Quercus vel Lobatae	0	0	0	0	1	1	0	0	1	1	0	1	1	1	1	0	0	0	0	0	0	0	0	0	0	0
Fagales:Fagaceae	Quercus	Section Quercus	Quercus douglasii Hook. & Arn.	GBIF, OOTW, FNA, PDB	Quercus sect Quercus vel Lobatae	0	0	0	0	0	0	0	0	0	0	0	0	0	0	0	0	0	1	1	0	0	0	0	1	0	0
Fagales:Fagaceae	Quercus	Section Quercus	Quercus dumosa Nutt.	GBIF, OOTW, FNA, PDB	Quercus sect Quercus vel Lobatae	0	0	0	0	0	0	0	0	0	0	0	0	0	0	0	0	0	1	1	0	0	0	0	1	0	0
Fagales:Fagaceae	Quercus	Section Quercus	Quercus durata Jeps.	GBIF, FNA, PDB	Quercus sect Quercus vel Lobatae	0	0	0	0	0	0	0	0	0	0	0	0	0	0	0	0	0	1	1	0	0	0	0	0	0	0
Fagales:Fagaceae	Quercus	Section Quercus	Quercus engelmannii Greene	Thompson et al. 1999 (B), PDB, GBIF, FNA, OOTW	Quercus sect Quercus vel Lobatae	0	0	0	0	0	0	0	0	0	0	0	0	0	0	0	0	0	1	1	0	0	0	0	1	0	0
Fagales:Fagaceae	Quercus	Section Quercus	Quercus lancifolia Liebm. (Q. leiophylla, Q.excelsa)	GBIF, OOTW	Quercus sect Quercus vel Lobatae	1	0	1	1	1	1	0	0	0	0	0	1	1	0	0	0	0	0	0	0	0	0	0	0	0	0
Fagales:Fagaceae	Quercus	Section Quercus	Quercus faginea Lam.	GBIF, OOTW	Quercus sect Quercus vel Lobatae	0	0	0	0	1	1	0	0	0	0	0	0	0	0	0	0	0	1	1	0	0	0	0	1	0	0
Fagales:Fagaceae	Quercus	Section Quercus	Quercus microphylla Née (Q. frutex Trel.)	GBIF, OOTW	Quercus sect Quercus vel Lobatae	0	0	1	1	1	1	0	0	0	0	0	1	1	0	0	0	0	0	0	0	0	0	0	0	0	0
Fagales:Fagaceae	Quercus	Section Quercus	Quercus germana Schltdl. & Cham. (Q.galeotti M.Martens & Galeotti)	GBIF, OOTW	Quercus sect Quercus vel Lobatae	0	0	0	0	1	1	0	0	0	0	0	1	1	0	0	0	0	0	0	0	0	0	0	0	0	0
Fagales:Fagaceae	Quercus	Section Quercus	Quercus glabrescens Benth.	GBIF, OOTW	Quercus sect Quercus vel Lobatae	0	0	0	1	1	1	0	0	0	0	0	1	1	0	0	0	0	0	0	0	0	0	0	0	0	0
Fagales:Fagaceae	Quercus	Section Quercus	Quercus glaucoides Mart. & Gal.	GBIF, OOTW	Quercus sect Quercus vel Lobatae	0	0	1	1	1	1	0	0	0	0	0	1	1	0	0	0	0	0	0	0	0	0	0	1	0	0
Fagales:Fagaceae	Quercus	Section Quercus	Quercus greggii (A.DC.) Trel.	GBIF, OOTW	Quercus sect Quercus vel Lobatae	0	0	0	0	1	1	0	0	0	0	0	1	1	0	0	0	0	0	0	0	0	0	0	0	0	0
Fagales:Fagaceae	Quercus	Section Quercus	Quercus hinckleyi C.H.Muller	Thompson et al. 1999 (B), PDB, GBIF, FNA, OOTW	Quercus sect Quercus vel Lobatae	0	0	0	0	0	0	0	0	0	0	0	0	0	0	0	0	0	0	0	0	0	0	1	1	1	0
Fagales:Fagaceae	Quercus	Section Quercus	Quercus canariensis Willd.	GBIF, OOTW	Quercus sect Quercus vel Lobatae	0	0	0	0	0	0	0	0	0	0	0	0	0	0	0	0	0	1	1	0	0	0	0	0	0	0
Fagales:Fagaceae	Quercus	Section Quercus	Quercus dalechampii Ten.	GBIF, OOTW	Quercus sect Quercus vel Lobatae	0	0	0	0	1	1	0	0	0	0	0	0	0	0	0	0	0	1	1	0	0	0	0	0	0	0
Fagales:Fagaceae	Quercus	Section Quercus	Quercus insignis Mart. & Gal.	GBIF, OOTW	Quercus sect Quercus vel Lobatae	1	1	1	1	1	1	0	0	0	0	0	1	1	0	0	0	0	0	0	0	0	0	0	0	0	0
Fagales:Fagaceae	Quercus	Section Quercus	Quercus intricata Trel.	GBIF, OOTW, FNA, PDB	Quercus sect Quercus vel Lobatae	0	0	0	0	0	0	0	0	0	0	0	0	0	0	0	0	0	0	0	0	0	0	1	1	1	0
Fagales:Fagaceae	Quercus	Section Quercus	Quercus invaginata Trel.	GBIF, OOTW	Quercus sect Quercus vel Lobatae	0	0	0	0	0	0	0	0	0	0	0	0	0	0	0	0	0	0	0	0	0	0	1	1	1	0
Fagales:Fagaceae	Quercus	Section Quercus	Quercus potosina Trel. (Q. jaralensis Trel.)	GBIF, OOTW	Quercus sect Quercus vel Lobatae	0	0	0	0	0	0	0	0	0	0	0	1	1	0	0	0	0	0	0	0	0	0	1	1	1	0
Fagales:Fagaceae	Quercus	Section Quercus	Quercus john-tuckeri Nixon & C.H.Mull.	GBIF, FNA, PDB	Quercus sect Quercus vel Lobatae	0	0	0	0	0	0	0	0	0	0	0	0	0	0	0	0	0	0	1	0	0	0	0	0	0	0
Fagales:Fagaceae	Quercus	Section Quercus	Quercus polymorpha Schltdl. & Cham. (Q. juergensenii Lieb.)	GBIF, OOTW, FNA, PDB	Quercus sect Quercus vel Lobatae	0	0	0	1	1	1	0	0	0	0	0	1	1	0	0	0	0	0	0	0	0	0	1	1	0	0
Fagales:Fagaceae	Quercus	Section Quercus	Quercus fabrei Hance (=Q.fabri)	Fang et al. 2011, FOC, GBIF, OOTW	Quercus sect Quercus vel Lobatae	0	0	0	0	1	1	0	0	0	0	0	1	1	0	0	0	0	0	0	0	0	0	0	0	0	0
Fagales:Fagaceae	Quercus	Section Quercus	Quercus frainetto Ten.	Browicz 1982 (1), GBIF, Caudullo et al. 2017, FOI, OOTW	Quercus sect Quercus vel Lobatae	0	0	0	0	1	1	0	0	1	0	0	0	0	0	0	0	0	1	1	0	0	0	0	0	0	0
Fagales:Fagaceae	Quercus	Section Quercus	Quercus gambelii Nutt.	Thompson et al. 1999 (B), PDB, GBIF, FNA, OOTW	Quercus sect Quercus vel Lobatae	0	0	0	0	1	1	0	0	1	1	0	0	0	0	0	0	0	1	1	0	1	0	0	1	1	0
Fagales:Fagaceae	Quercus	Section Quercus	Quercus garryana Douglas ex Hook.	Thompson et al. 1999 (B), PDB, GBIF, FNA, OOTW	Quercus sect Quercus vel Lobatae	0	0	0	0	0	1	0	0	0	0	0	0	0	0	0	0	0	0	1	0	1	0	0	0	0	0
Fagales:Fagaceae	Quercus	Section Quercus	Quercus griffithii Hook.f. & Thomson ex Miq.	Fang et al. 2011, FOC, GBIF, OOTW	Quercus sect Quercus vel Lobatae	0	0	0	1	1	0	0	0	0	0	0	1	1	0	0	0	0	0	0	0	0	0	0	0	0	0
Fagales:Fagaceae	Quercus	Section Quercus	Quercus grisea Liebm.	Thompson et al. 1999 (B), PDB, GBIF, FNA, OOTW	Quercus sect Quercus vel Lobatae	0	0	0	0	0	0	0	0	0	0	0	1	1	0	0	0	0	0	1	0	0	0	0	1	0	0
Fagales:Fagaceae	Quercus	Section Quercus	Quercus hartwissiana Steven	Browicz 1982 (1), GBIF, OOTW	Quercus sect Quercus vel Lobatae	0	0	0	0	1	1	0	0	1	0	0	0	0	0	0	0	0	1	0	0	0	0	0	0	0	0
Fagales:Fagaceae	Quercus	Section Quercus	Quercus havardii Rydb.	Thompson et al. 1999 (B), PDB, GBIF, FNA, OOTW	Quercus sect Quercus vel Lobatae	0	0	0	0	1	0	0	0	0	0	0	0	0	0	0	0	0	0	0	0	0	0	1	1	1	0
Fagales:Fagaceae	Quercus	Section Quercus	Quercus infectoria Oliv.	Browicz 1982 (1), GBIF, Caudullo et al. 2017, FOI, OOTW	Quercus sect Quercus vel Lobatae	0	0	0	0	0	0	0	0	0	0	0	0	0	0	0	0	0	1	1	1	1	0	0	0	0	0
Fagales:Fagaceae	Quercus	Section Quercus	Quercus laceyi Small	GBIF, OOTW, FNA, PDB	Quercus sect Quercus vel Lobatae	0	0	0	0	1	0	0	0	0	0	0	0	0	0	0	0	0	0	0	0	0	0	1	1	1	0
Fagales:Fagaceae	Quercus	Section Quercus	Quercus laxa Liebm.	GBIF, OOTW	Quercus sect Quercus vel Lobatae	0	0	0	0	0	0	0	0	0	0	0	1	1	0	0	0	0	0	0	0	0	0	1	1	1	0
Fagales:Fagaceae	Quercus	Section Quercus	Quercus repanda Humb. & Bonpl. (Q. repanda)	GBIF, OOTW	Quercus sect Quercus vel Lobatae	0	0	0	0	1	1	0	0	0	0	0	1	1	0	0	0	0	0	0	0	0	0	0	0	0	0
Fagales:Fagaceae	Quercus	Section Quercus	Quercus liebmannii Oerst. Ex Trel.	GBIF, OOTW	Quercus sect Quercus vel Lobatae	0	0	0	1	1	1	0	0	0	0	0	1	1	0	0	0	0	0	0	0	0	0	1	0	0	0
Fagales:Fagaceae	Quercus	Section Quercus	Quercus macdougallii Martinez	GBIF, OOTW	Quercus sect Quercus vel Lobatae	0	0	0	1	1	1	0	0	0	0	0	1	1	0	0	0	0	0	0	0	0	0	0	0	0	0
Fagales:Fagaceae	Quercus	Section Quercus	Quercus margrett(i)ae (Ash) Sm.	GBIF, FNA, PDB	Quercus sect Quercus vel Lobatae	0	0	0	0	1	0	0	0	0	0	0	0	0	0	0	0	0	0	0	0	0	0	0	0	0	0
Fagales:Fagaceae	Quercus	Section Quercus	Quercus martinezii C.H.Mull.	GBIF, OOTW	Quercus sect Quercus vel Lobatae	0	0	1	1	0	0	0	0	0	0	0	1	1	0	0	0	0	0	0	0	0	0	0	0	0	0
Fagales:Fagaceae	Quercus	Section Quercus	Quercus segoviensis Liebm.	GBIF, OOTW	Quercus sect Quercus vel Lobatae	0	0	0	1	0	1	0	0	0	0	0	1	1	0	0	0	0	0	0	0	0	0	0	0	0	0
Fagales:Fagaceae	Quercus	Section Quercus	Quercus tuberculata Trel. C.H.Mull.	GBIF, OOTW	Quercus sect Quercus vel Lobatae	0	0	0	0	0	0	0	0	0	0	0	1	1	0	0	0	0	0	0	0	0	0	1	1	1	0
Fagales:Fagaceae	Quercus	Section Quercus	Quercus oblongifolia Torr.	GBIF, OOTW, FNA, PDB	Quercus sect Quercus vel Lobatae	0	0	0	0	0	0	0	0	0	0	0	1	1	0	0	0	0	0	0	0	0	0	1	1	1	0
Fagales:Fagaceae	Quercus	Section Quercus	Quercus obtusata Humb. & Bonpl.	GBIF, OOTW	Quercus sect Quercus vel Lobatae	0	0	1	1	1	1	0	0	0	0	0	1	1	0	0	0	0	0	0	0	0	0	1	1	0	0
Fagales:Fagaceae	Quercus	Section Quercus	Quercus oglethorpensis W.H.Duncan	GBIF, OOTW, FNA, PDB	Quercus sect Quercus vel Lobatae	0	0	0	0	1	0	0	0	0	0	0	0	0	0	0	0	0	0	0	0	0	0	0	0	0	0
Fagales:Fagaceae	Quercus	Section Quercus	Quercus oocarpa Trel.	GBIF, OOTW	Quercus sect Quercus vel Lobatae	1	1	0	1	0	1	0	0	0	0	0	0	1	0	0	0	0	0	0	0	0	0	0	0	0	0
Fagales:Fagaceae	Quercus	Section Quercus	Quercus opaca Trel.	GBIF, OOTW	Quercus sect Quercus vel Lobatae	0	0	0	1	1	1	0	0	0	0	0	1	1	0	0	0	0	0	0	0	0	0	0	0	0	0
Fagales:Fagaceae	Quercus	Section Quercus	Quercus pacifica Nixon & C.H.Muller	GBIF, FNA, PDB	Quercus sect Quercus vel Lobatae	0	0	0	0	0	0	0	0	0	0	0	0	0	0	0	0	0	0	1	0	0	0	0	0	0	0
Fagales:Fagaceae	Quercus	Section Quercus	Quercus parvula Greene	GBIF, OOTW, FNA, PDB	Quercus sect Quercus vel Lobatae	0	0	0	0	0	0	0	0	0	0	0	0	0	0	0	0	0	0	1	0	0	0	0	0	0	0
Fagales:Fagaceae	Quercus	Section Quercus	Quercus perpallida Trel.	GBIF, OOTW	Quercus sect Quercus vel Lobatae	0	0	0	0	0	0	0	0	0	0	0	1	1	0	0	0	0	0	0	0	0	0	1	0	0	0
Fagales:Fagaceae	Quercus	Section Quercus	Quercus praeco Trel.	GBIF, OOTW	Quercus sect Quercus vel Lobatae	0	0	0	0	0	0	0	0	0	0	0	1	1	0	0	0	0	0	0	0	0	0	1	0	0	0
Fagales:Fagaceae	Quercus	Section Quercus	Quercus pringlei Seemen ex Loes.	GBIF, OOTW	Quercus sect Quercus vel Lobatae	0	0	0	1	1	1	0	0	0	0	0	1	1	0	0	0	0	0	0	0	0	0	1	1	1	0
Fagales:Fagaceae	Quercus	Section Quercus	Quercus prinoides Willd.	GBIF, OOTW, FNA, PDB	Quercus sect Quercus vel Lobatae	0	0	0	0	1	0	0	1	1	0	0	0	0	0	0	0	0	0	0	0	0	0	0	0	0	0
Fagales:Fagaceae	Quercus	Section Quercus	Quercus purulhana Trel.	GBIF, OOTW	Quercus sect Quercus vel Lobatae	0	1	1	1	0	0	0	0	0	0	0	0	1	0	0	0	0	0	0	0	0	0	0	0	0	0
Fagales:Fagaceae	Quercus	Section Quercus	Quercus resionsa Liebm.	GBIF, OOTW	Quercus sect Quercus vel Lobatae	0	0	1	1	0	0	0	0	0	0	0	1	1	0	0	0	0	0	0	0	0	0	1	1	0	0
Fagales:Fagaceae	Quercus	Section Quercus	Quercus sebifera Trel.	GBIF, OOTW	Quercus sect Quercus vel Lobatae	0	0	0	0	1	1	0	0	0	0	0	1	1	0	0	0	0	0	0	0	0	0	0	0	0	0
Fagales:Fagaceae	Quercus	Section Quercus	Quercus similis Ashe	GBIF, OOTW, FNA, PDB	Quercus sect Quercus vel Lobatae	0	0	0	0	1	0	0	0	0	0	0	0	0	0	0	0	0	0	0	0	0	0	0	0	0	0
Fagales:Fagaceae	Quercus	Section Quercus	Quercus splendens Née	GBIF, OOTW	Quercus sect Quercus vel Lobatae	0	1	1	1	0	0	0	0	0	0	0	1	1	0	0	0	0	0	0	0	0	0	0	0	0	0
Fagales:Fagaceae	Quercus	Section Quercus	Quercus striatula Trel.	GBIF, OOTW	Quercus sect Quercus vel Lobatae	0	0	0	0	0	1	0	0	0	0	0	1	1	0	0	0	0	0	0	0	0	0	1	1	0	0
Fagales:Fagaceae	Quercus	Section Quercus	Quercus subpatulata Trel.	GBIF, OOTW	Quercus sect Quercus vel Lobatae	0	0	1	1	0	0	0	0	0	0	0	1	1	0	0	0	0	0	0	0	0	0	1	1	0	0
Fagales:Fagaceae	Quercus	Section Quercus	Quercus toumeyi Sarg.	Thompson et al. 1999 (B), PDB, GBIF, FNA, OOTW	Quercus sect Quercus vel Lobatae	0	0	0	0	0	0	0	0	0	0	0	1	1	0	0	0	0	0	0	0	0	0	1	1	0	0
Fagales:Fagaceae	Quercus	Section Quercus	Quercus undata Trel.	GBIF, OOTW	Quercus sect Quercus vel Lobatae	0	0	0	0	0	0	0	0	0	0	0	1	1	0	0	0	0	0	0	0	0	0	0	0	0	0	too few geo-referenced points
Fagales:Fagaceae	Quercus	Section Quercus	Quercus vaseyana Buckley	GBIF, OOTW, FNA, PDB	Quercus sect Quercus vel Lobatae	0	0	0	0	0	0	0	0	0	0	0	0	0	0	0	0	0	0	0	0	0	0	1	1	1	0
Fagales:Fagaceae	Quercus	Section Quercus	Quercus verde C.H.Mull.	GBIF, OOTW	Quercus sect Quercus vel Lobatae	0	0	0	0	1	1	0	0	0	0	0	0	0	0	0	0	0	0	0	0	0	0	0	0	0	0	too few geo-referenced points
Fagales:Fagaceae	Quercus	Section Quercus	Quercus vicentensis Trel.	GBIF, OOTW	Quercus sect Quercus vel Lobatae	0	0	0	1	0	0	0	0	0	0	0	1	1	0	0	0	0	0	0	0	0	0	0	0	0	0
Fagales:Fagaceae	Quercus	Section Quercus	Quercus fruticosa Brot.	GBIF, OOTW	Quercus sect Quercus vel Lobatae	0	0	0	0	0	0	0	0	0	0	0	0	0	0	0	0	0	1	0	0	0	0	0	0	0	0
Fagales:Fagaceae	Quercus	Section Quercus	Quercus lobata Née	Thompson et al. 1999 (B), PDB, GBIF, FNA, OOTW	Quercus sect Quercus vel Lobatae	0	0	0	0	0	0	0	0	0	0	0	0	0	0	0	0	0	1	1	0	0	0	0	0	0	0
Fagales:Fagaceae	Quercus	Section Quercus	Quercus lyrata Walter	Thompson et al. 1999 (B), PDB, GBIF, FNA, OOTW	Quercus sect Quercus vel Lobatae	0	0	0	0	1	0	0	0	0	0	0	0	0	0	0	0	0	0	0	0	0	0	0	0	0	0
Fagales:Fagaceae	Quercus	Section Quercus	Quercus macranthera Fisch. & C.A.Mey. ex Hohen.	Browicz 1982 (1), GBIF, OOTW	Quercus sect Quercus vel Lobatae	0	0	0	0	1	1	0	0	1	1	0	0	0	0	0	0	0	0	1	0	1	0	0	0	0	0
Fagales:Fagaceae	Quercus	Section Quercus	Quercus macrocarpa Michx.	Thompson et al. 1999 (B), PDB, GBIF, FNA, OOTW	Quercus sect Quercus vel Lobatae	0	0	0	0	1	1	0	1	1	0	0	0	0	0	0	0	0	0	0	0	0	0	0	0	0	0
Fagales:Fagaceae	Quercus	Section Quercus	Quercus michauxii Nutt.	Thompson et al. 1999 (B), PDB, GBIF, FNA, OOTW	Quercus sect Quercus vel Lobatae	0	0	0	0	1	0	0	0	0	0	0	0	0	0	0	0	0	0	0	0	0	0	0	0	0	0
Fagales:Fagaceae	Quercus	Section Quercus	Quercus mohriana Buckley ex Rydb.	Thompson et al. 1999 (B), PDB, GBIF, FNA, OOTW	Quercus sect Quercus vel Lobatae	0	0	0	0	1	0	0	0	0	0	0	0	0	0	0	0	0	0	0	0	0	0	1	1	1	0
Fagales:Fagaceae	Quercus	Section Quercus	Quercus mongolica Fischer ex Ledeb.	Fang et al. 2011, FOC, GBIF, OOTW	Quercus sect Quercus vel Lobatae	0	0	0	0	0	0	0	0	1	1	0	1	1	0	1	1	0	0	0	0	0	0	0	1	0	1
Fagales:Fagaceae	Quercus	Section Quercus	Quercus montana Willd.	Thompson et al. 1999 (B), PDB, GBIF, FNA, OOTW	Quercus sect Quercus vel Lobatae	0	0	0	0	1	1	0	1	1	0	0	0	0	0	0	0	0	0	0	0	0	0	0	0	0	0
Fagales:Fagaceae	Quercus	Section Quercus	Quercus muehlenbergii Engelm.	Thompson et al. 1999 (B), PDB, GBIF, FNA, OOTW	Quercus sect Quercus vel Lobatae	0	0	0	0	1	1	0	1	1	0	0	0	0	0	0	0	0	0	0	0	0	0	0	0	0	0
Fagales:Fagaceae	Quercus	Section Quercus	Quercus ningangensis W.C.Cheng & Z.C.Hsu	Fang et al. 2011, FOC, GBIF, OOTW	Quercus sect Quercus vel Lobatae	0	0	0	0	1	0	0	0	0	0	0	0	0	0	0	0	0	0	0	0	0	0	0	0	0	0
Fagales:Fagaceae	Quercus	Section Quercus	Quercus petraea (Matt.) Liebl. subsp. petraea	GBIF, Caudullo et al. 2017, OOTW	Quercus sect Quercus vel Lobatae	0	0	0	0	1	1	0	0	1	0	0	0	0	0	0	0	0	1	1	0	0	0	0	0	0	0
Fagales:Fagaceae	Quercus	Section Quercus	Quercus pubescens Willd.	Browicz 1982 (1), GBIF, Caudullo et al. 2017, OOTW	Quercus sect Quercus vel Lobatae	0	0	0	0	1	1	0	0	0	0	0	0	0	0	0	0	0	1	1	0	0	0	0	1	0	0
Fagales:Fagaceae	Quercus	Section Quercus	Quercus pungens Liebm.	Thompson et al. 1999 (B), PDB, GBIF, FNA, OOTW	Quercus sect Quercus vel Lobatae	0	0	0	1	1	0	0	0	0	0	0	0	0	0	0	0	0	0	0	0	0	0	1	1	1	0
Fagales:Fagaceae	Quercus	Section Quercus	Quercus pyrenaica Willd.	GBIF, Caudullo et al. 2017, OOTW	Quercus sect Quercus vel Lobatae	0	0	0	0	1	1	0	0	0	0	0	0	0	0	0	0	0	1	1	0	0	0	0	0	0	0
Fagales:Fagaceae	Quercus	Section Quercus	Quercus robur L.	GBIF, Caudullo et al. 2017, OOTW	Quercus sect Quercus vel Lobatae	0	0	0	0	1	1	0	1	1	0	0	0	0	0	0	0	0	1	1	0	0	0	0	0	0	0
Fagales:Fagaceae	Quercus	Section Quercus	Quercus rugosa Née (Q. decipiens M.Martens & Galeotti)	Thompson et al. 1999 (B), PDB, GBIF, FNA, OOTW	Quercus sect Quercus vel Lobatae	0	1	1	1	0	1	0	0	0	0	0	1	1	0	0	0	0	0	0	0	0	0	1	1	0	0
Fagales:Fagaceae	Quercus	Section Quercus	Quercus serrata Murray	Fang et al. 2011, FOC, GBIF, OOTW	Quercus sect Quercus vel Lobatae	0	0	0	0	1	1	0	0	1	0	0	1	1	1	1	1	0	0	0	0	0	0	0	0	0	0
Fagales:Fagaceae	Quercus	Section Quercus	Quercus sinuata Walt.	GBIF, OOTW, FNA, PDB	Quercus sect Quercus vel Lobatae	0	0	0	0	1	1	0	0	0	0	0	0	0	0	0	0	0	0	0	0	0	0	1	1	0	0
Fagales:Fagaceae	Quercus	Section Quercus	Quercus stellata Wangenh.	Thompson et al. 1999 (B), PDB, GBIF, FNA, OOTW	Quercus sect Quercus vel Lobatae	0	0	0	0	1	1	0	1	0	0	0	0	0	0	0	0	0	0	0	0	0	0	0	0	0	0
Fagales:Fagaceae	Quercus	Section Quercus	Quercus turbinella Greene	Thompson et al. 1999 (B), PDB, GBIF, FNA, OOTW	Quercus sect Quercus vel Lobatae	0	0	0	0	0	0	0	0	0	0	0	0	0	0	0	0	0	0	1	0	0	0	1	1	1	1
Fagales:Fagaceae	Quercus	Section Quercus	Quercus virginiana Mill.	Thompson et al. 1999 (B), PDB, GBIF, FNA, OOTW	Quercus sect Quercus vel Lobatae	1	1	0	1	1	0	0	0	0	0	0	0	0	0	0	0	0	0	0	0	0	0	0	0	0	0
Fagales:Fagaceae	Quercus	Section Quercus	Quercus yunnanensis Franch.	Fang et al. 2011, FOC, GBIF, OOTW	Quercus sect Quercus vel Lobatae	0	0	0	0	1	1	0	0	0	0	0	1	1	0	0	0	0	0	0	0	0	0	0	0	0	0
Fagales:Juglandaceae: Engelhardioideae	Alfaroa		Alfaroa costaricensis Standl.	GBIF	Engelhardioideae gen. et sp. indet.	1	1	0	1	0	1	0	0	0	0	0	0	1	0	0	0	0	0	0	0	0	0	0	0	0	0
Fagales:Juglandaceae: Engelhardioideae	Alfaroa		Alfaroa guanacastensis D.E.Stone	GBIF	Engelhardioideae gen. et sp. indet.	1	1	0	1	0	0	0	0	0	0	0	0	0	0	0	0	0	0	0	0	0	0	0	0	0	0
Fagales:Juglandaceae: Engelhardioideae	Alfaroa		Alfaroa guatemalenis (Standl.) L.O.Williams & Ant.Molina	GBIF	Engelhardioideae gen. et sp. indet.	1	1	0	1	0	1	0	0	0	0	0	0	1	0	0	0	0	0	0	0	0	0	0	0	0	0
Fagales:Juglandaceae: Engelhardioideae	Alfaroa		Alfaroa hondurensis L.O.Williams	GBIF	Engelhardioideae gen. et sp. indet.	0	1	0	1	0	0	0	0	0	0	0	0	0	0	0	0	0	0	0	0	0	0	0	0	0	0
Fagales:Juglandaceae: Engelhardioideae	Alfaroa		Alfaroa manningii J.León	GBIF	Engelhardioideae gen. et sp. indet.	1	0	0	0	0	1	0	0	0	0	0	0	0	0	0	0	0	0	0	0	0	0	0	0	0	0
Fagales:Juglandaceae: Engelhardioideae	Alfaroa		Alfaroa mexicana D.E.Stone	GBIF	Engelhardioideae gen. et sp. indet.	1	1	0	1	1	1	0	0	0	0	0	0	1	0	0	0	0	0	0	0	0	0	0	0	0	0
Fagales:Juglandaceae: Engelhardioideae	Alfaroa		Alfaroa williamsii Ant.Molina	GBIF	Engelhardioideae gen. et sp. indet.	1	1	1	1	0	1	0	0	0	0	0	0	0	0	0	0	0	0	0	0	0	0	0	0	0	0
Fagales:Juglandaceae: Engelhardioideae	Oreomunnea		Oreomunnea mexicana (Standl.) J.-F. Leroy	GBIF	Engelhardioideae gen. et sp. indet.	1	1	0	1	1	1	0	0	0	0	0	1	1	0	0	0	0	0	0	0	0	0	0	0	0	0
Fagales:Juglandaceae: Engelhardioideae	Oreomunnea		Oreomunnea pterocarpa Oerst.	GBIF	Engelhardioideae gen. et sp. indet.	1	1	0	1	0	1	0	0	0	0	0	0	0	0	0	0	0	0	0	0	0	0	0	0	0	0
Fagales:Juglandaceae: Engelhardioideae	Engelhardia		Engehardia apoensis Elmer ex Nagel	GBIF	Engelhardioideae gen. et sp. indet.	0	0	0	0	0	0	0	0	0	0	0	0	0	0	0	0	0	0	0	0	0	0	0	0	0	0
Fagales:Juglandaceae: Engelhardioideae	Engelhardia		Engelhardia hainanensis P.Y.Chen	Fang et al. 2011, FOC, GBIF	Engelhardioideae gen. et sp. indet.	0	0	0	1	0	0	0	0	0	0	0	0	0	0	0	0	0	0	0	0	0	0	0	0	0	0
Fagales:Juglandaceae: Engelhardioideae	Engelhardia		Engelhardia roxburghiana Wall.	Fang et al. 2011, FOC, GBIF	Engelhardioideae gen. et sp. indet.	0	1	0	1	1	1	0	0	0	0	0	1	1	0	0	0	0	0	0	0	0	0	0	0	0	0
Fagales:Juglandaceae: Engelhardioideae	Engelhardia		Engelhardia serrata Blume	Fang et al. 2011, FOC, GBIF	Engelhardioideae gen. et sp. indet.	1	1	0	1	0	0	0	0	0	0	0	1	0	0	0	0	0	0	0	0	0	0	0	0	0	0
Fagales:Juglandaceae: Engelhardioideae	Engelhardia		Engelhardia spicata Lesch. Ex Blume	Fang et al. 2011, FOC, GBIF	Engelhardioideae gen. et sp. indet.	1	1	0	1	0	0	0	0	0	0	0	1	1	0	0	0	0	0	0	0	0	0	0	0	0	0
Fagales:Juglandaceae: Engelhardioideae	Engelhardia		Engelhardia rigida Blume	GBIF	Engelhardioideae gen. et sp. indet.	1	1	0	0	0	0	0	0	0	0	0	0	0	0	0	0	0	0	0	0	0	0	0	0	0	0
Fagales:Juglandaceae:Juglandoideae	Carya	EAsia Clade	Carya cathayensis Sarg.	Zhang et al. 2013, Fang et al. 2011, FOC, GBIF	Carya sp.	0	0	0	0	1	1	0	0	0	0	0	1	1	0	0	0	0	0	0	0	0	0	0	0	0	0
Fagales:Juglandaceae:Juglandoideae	Carya	EAsia Clade	Carya hunanensis W.C.Cheng & R.H.Chang ex Chang & Lu	Zhang et al. 2013, Fang et al. 2011, FOC, GBIF	Carya sp.	0	0	0	0	1	1	0	0	0	0	0	1	1	0	0	0	0	0	0	0	0	0	0	0	0	0
Fagales:Juglandaceae:Juglandoideae	Carya	EAsia Clade	Carya kweichowensis Kuang & A.M.Lu	Zhang et al. 2013, Fang et al. 2011, FOC, GBIF	Carya sp.	0	0	0	0	0	0	0	0	0	0	0	1	1	0	0	0	0	0	0	0	0	0	0	0	0	0
Fagales:Juglandaceae:Juglandoideae	Carya	EAsia Clade	Carya tonkinensis Lecomte	Zhang et al. 2013, Fang et al. 2011, FOC, GBIF	Carya sp.	0	0	0	1	0	0	0	0	0	0	0	1	1	0	0	0	0	0	0	0	0	0	0	0	0	0
Fagales:Juglandaceae:Juglandoideae	Carya	NA Clade	Carya aquatica (F.Michx.) Elliot	Zhang et al. 2013, Thompson et al. 1999 (B), PDB, GBIF, FNA	Carya sp.	0	0	0	0	1	0	0	0	0	0	0	0	0	0	0	0	0	0	0	0	0	0	0	0	0	0
Fagales:Juglandaceae:Juglandoideae	Carya	ENA Clade	Carya cordiformis (Wangenh.) K.Koch	Zhang et al. 2013, Thompson et al. 1999 (B), PDB, GBIF, FNA	Carya sp.	0	0	0	0	1	1	0	1	1	0	0	0	0	0	0	0	0	0	0	0	0	0	0	0	0	0
Fagales:Juglandaceae:Juglandoideae	Carya	ENA Clade	Carya floridana Sarg.	Zhang et al. 2013, hompson et al. 1999 (B), PDB, GBIF, FNA	Carya sp.	0	0	0	0	1	0	0	0	0	0	0	0	0	0	0	0	0	0	0	0	0	0	0	0	0	0
Fagales:Juglandaceae:Juglandoideae	Carya	ENA Clade	Carya glabra (P.Mill.) Sweet	Zhang et al. 2013, Thompson et al. 1999 (B), PDB, GBIF, FNA	Carya sp.	0	0	0	0	1	1	0	1	0	0	0	0	0	0	0	0	0	0	0	0	0	0	0	0	0	0
Fagales:Juglandaceae:Juglandoideae	Carya	ENA Clade	Carya illinoensis (Wangenh.) K.Koch	Zhang et al. 2013, Thompson et al. 1999 (B), PDB, GBIF, FNA	Carya sp.	0	0	0	0	1	1	0	0	0	0	0	1	1	0	0	0	0	0	0	0	0	0	1	1	0	0
Fagales:Juglandaceae:Juglandoideae	Carya	ENA Clade	Carya laciniosa (Michx.f.) G.Don	Zhang et al. 2013, Thompson et al. 1999 (B), PDB, GBIF, FNA	Carya sp.	0	0	0	0	1	1	0	1	1	0	0	0	0	0	0	0	0	0	0	0	0	0	0	0	0	0
Fagales:Juglandaceae:Juglandoideae	Carya	ENA Clade	Carya myristiciformis (F.Michx.) Elliot	Zhang et al. 2013, Thompson et al. 1999 (B), PDB, GBIF, FNA, CVPM	Carya sp.	0	0	0	0	1	1	0	0	0	0	0	1	1	0	0	0	0	0	0	0	0	0	0	0	0	0
Fagales:Juglandaceae:Juglandoideae	Carya	ENA Clade	Carya ovalis (Wangenh.) Sarg.	Zhang et al. 2013, GBIF, PDB	Carya sp.	0	0	0	0	1	1	0	1	1	0	0	0	0	0	0	0	0	0	0	0	0	0	0	0	0	0
Fagales:Juglandaceae:Juglandoideae	Carya	ENA Clade	Carya ovata (P.Mill.) K.Koch	Zhang et al. 2013, Thompson et al. 1999 (B), PDB, GBIF, FNA, CVPM	Carya sp.	0	0	0	0	1	1	0	1	1	0	0	0	0	0	0	0	0	0	0	0	0	0	0	0	0	0
Fagales:Juglandaceae:Juglandoideae	Carya	ENA Clade	Carya pallida (Ashe) Engl. & Graebn.	Zhang et al. 2013, Thompson et al. 1999 (B), PDB, GBIF, FNA, CVPM	Carya sp.	0	0	0	0	1	0	0	0	0	0	0	0	0	0	0	0	0	0	0	0	0	0	0	0	0	0
Fagales:Juglandaceae:Juglandoideae	Carya	ENA Clade	Carya texana Buckley	Zhang et al. 2013, Thompson et al. 1999 (B), PDB, GBIF, FNA, CVPM	Carya sp.	0	0	0	0	1	0	0	0	0	0	0	0	0	0	0	0	0	0	0	0	0	0	0	0	0	0
Fagales:Juglandaceae:Juglandoideae	Carya	ENA Clade	Carya tomentosa (Lam.) Nutt.	Zhang et al. 2013, GBIF, PDB, FNA	Carya sp.	0	0	0	0	1	1	0	1	1	0	0	0	0	0	0	0	0	0	0	0	0	0	0	0	0	0
Fagales:Juglandaceae:Juglandoideae	Juglans	Sect. Cardiocaryon	Juglans ailantifolia Carr.	GBIF, FOJ	Juglans sp.	0	0	0	0	1	1	0	0	1	0	0	0	0	0	0	0	0	0	0	0	0	0	0	0	0	0
Fagales:Juglandaceae:Juglandoideae	Juglans	Sect. Cardiocaryon	Juglans mandshurica Maxim.	Fang et al. 2011, FOC, GBIF, FOJ	Juglans sp.	0	0	0	0	1	1	0	0	1	0	0	1	1	1	1	0	0	0	0	0	0	0	0	0	0	0
Fagales:Juglandaceae:Juglandoideae	Juglans	Sect. Juglans	Juglans regia L.	Fang et al. 2011, FOC, GBIF, FOJ	Juglans sp.	0	0	0	0	1	1	0	1	1	0	0	1	1	0	1	0	0	0	0	0	0	0	0	1	0	0
Fagales:Juglandaceae:Juglandoideae	Juglans	Sect. Juglans	Juglans sigillata Dode	Fang et al. 2011, FOC, GBIF, FOJ	Juglans sp.	0	0	0	0	0	0	0	0	0	0	0	1	1	0	0	0	0	0	0	0	0	0	0	0	0	0
Fagales:Juglandaceae:Juglandoideae	Juglans	Sect. Rhysocaryon	Jugkans mollis Engelm.	GBIF	Juglans sp.	0	0	1	1	1	1	0	0	0	0	0	1	1	0	0	0	0	0	0	0	0	0	1	1	0	0
Fagales:Juglandaceae:Juglandoideae	Juglans	Sect. Rhysocaryon	Juglans australis Gris.	GBIF	Juglans sp.	0	0	0	0	1	1	0	0	0	0	0	1	1	0	0	0	0	0	0	0	0	0	0	0	0	0
Fagales:Juglandaceae:Juglandoideae	Juglans	Sect. Rhysocaryon	Juglans boliviana Dode	GBIF	Juglans sp.	0	0	0	1	0	1	0	0	0	0	0	1	1	0	0	0	0	0	0	0	0	0	0	0	0	0
Fagales:Juglandaceae:Juglandoideae	Juglans	Sect. Rhysocaryon	Juglans californica S.Watson	Thompson et al. 1999 (B), PDB, GBIF, FNA	Juglans sp.	0	0	0	0	0	0	0	0	0	0	0	0	0	0	0	0	0	1	0	0	0	0	0	0	0	0
Fagales:Juglandaceae:Juglandoideae	Juglans	Sect. Rhysocaryon	Juglans cinerea L.	Thompson et al. 1999 (B), PDB, GBIF, FNA	Juglans sp.	0	0	0	0	1	1	0	1	1	0	0	0	0	0	0	0	0	0	0	0	0	0	0	0	0	0
Fagales:Juglandaceae:Juglandoideae	Juglans	Sect. Rhysocaryon	Juglans hindsii (Jeps.) Jeps. ex R.E.Sm.	Thompson et al. 1999 (B), PDB, GBIF, FNA	Juglans sp.	0	0	0	0	0	0	0	0	0	0	0	0	0	0	0	0	0	1	1	0	0	0	0	0	0	0
Fagales:Juglandaceae:Juglandoideae	Juglans	Sect. Rhysocaryon	Juglans major (Torr.) A.Heller	Thompson et al. 1999 (B), PDB, GBIF, FNA	Juglans sp.	0	0	1	0	0	1	0	0	0	0	0	1	1	0	0	0	0	1	1	0	0	0	0	0	0	0
Fagales:Juglandaceae:Juglandoideae	Juglans	Sect. Rhysocaryon	Juglans microcarpa Berl.	Thompson et al. 1999 (B), PDB, GBIF, FNA	Juglans sp.	0	0	0	0	1	0	0	0	0	0	0	0	0	0	0	0	0	0	0	0	0	0	1	1	0	0
Fagales:Juglandaceae:Juglandoideae	Juglans	Sect. Rhysocaryon	Juglans neotropica Diels	GBIF	Juglans sp.	0	0	0	1	0	1	0	0	0	0	0	0	0	0	0	0	0	0	0	0	0	0	0	0	0	0
Fagales:Juglandaceae:Juglandoideae	Juglans	Sect. Rhysocaryon	Juglans nigra L.	Thompson et al. 1999 (B), PDB, GBIF, FNA	Juglans sp.	0	0	0	0	1	1	0	1	1	0	0	0	0	0	0	0	0	0	0	0	0	0	0	0	0	0
Fagales:Juglandaceae:Juglandoideae	Pterocarya	Sect. Platyptera	Pterocarya macroptera Batalin	Fang et al. 2011, FOC, GBIF	Pterocarya vel Cyclocarya sp.	0	0	0	0	1	1	0	0	0	0	0	1	1	0	0	0	0	0	0	0	0	0	0	0	0	0
Fagales:Juglandaceae:Juglandoideae	Pterocarya	Sect. Platyptera	Pterocarya rhoifolia Siebold & Zucc.	GBIF, FOJ	Pterocarya vel Cyclocarya sp.	0	0	0	0	1	1	0	1	1	0	0	0	0	0	0	0	0	0	0	0	0	0	0	0	0	0
Fagales:Juglandaceae:Juglandoideae	Pterocarya	Sect. Pterocarya	Pterocarya fraxinifolia (Poiret) Spach	Browicz 1982 (1), GBIF, EUFORGEN	Pterocarya vel Cyclocarya sp.	0	0	0	0	1	1	0	0	0	0	0	0	0	0	0	0	0	1	0	0	0	0	0	0	0	0
Fagales:Juglandaceae:Juglandoideae	Pterocarya	Sect. Pterocarya	Pterocarya hupehensis Skan	Fang et al. 2011, FOC, GBIF	Pterocarya vel Cyclocarya sp.	0	0	0	0	1	1	0	0	0	0	0	1	1	0	0	0	0	0	0	0	0	0	0	0	0	0
Fagales:Juglandaceae:Juglandoideae	Pterocarya	Sect. Pterocarya	Pterocarya stenoptera C.DC.	Fang et al. 2011, FOC, GBIF	Pterocarya vel Cyclocarya sp.	0	0	0	1	1	1	1	0	1	0	0	1	1	1	1	0	0	0	0	0	0	0	0	0	0	0
Fagales:Juglandaceae:Juglandoideae	Pterocarya	Sect. Pterocarya	Pterocarya tonkinensis (Franch.) Dode	Fang et al. 2011, FOC, GBIF	Pterocarya vel Cyclocarya sp.	0	0	0	1	1	0	0	0	0	0	0	1	1	0	0	0	0	0	0	0	0	0	0	0	0	0
Fagales:Juglandaceae:Juglandoideae	Cyclocarya		Cyclocarya paliurus (Batal.) Iljinsk.	Fang et al. 2011, FOC, GBIF	Pterocarya vel Cyclocarya sp.	0	0	0	0	1	1	0	0	0	0	0	1	1	0	0	0	0	0	0	0	0	0	0	0	0	0
Fagales:Myricaceae	Morella		Morella adenophora (Hance) J.Herbert	Fang et al. 2011, FOC, GBIF	Myrica vel Morella sp.	0	1	0	1	1	0	0	0	0	0	0	1	0	0	0	0	0	0	0	0	0	0	0	0	0	0
Fagales:Myricaceae	Morella		Morella californica (Cham. & Schltdl.) Wilbur (=Myrica californica Cham.)	PDB, GBIF, FNA	Myrica vel Morella sp.	0	0	0	0	0	0	0	0	0	0	0	0	0	0	0	0	0	1	0	0	0	0	0	0	0	0
Fagales:Myricaceae	Morella		Morella caroliniensis (Mill.) Small	PDB, GBIF, FNA	Myrica vel Morella sp.	0	0	0	0	1	0	0	0	0	0	0	0	0	0	0	0	0	0	0	0	0	0	0	0	0	0
Fagales:Myricaceae	Morella		Morella cerifera (L.) Small	PDB, GBIF, FNA	Myrica vel Morella sp.	1	1	0	1	1	0	0	0	0	0	0	0	0	0	0	0	0	0	0	0	0	0	0	0	0	0
Fagales:Myricaceae	Morella		Morella esculenta (Buch.-Ham.) xxx	Fang et al. 2011, FOC, GBIF	Myrica vel Morella sp.	1	1	0	1	1	0	0	0	0	0	0	1	1	0	0	0	0	0	0	0	0	0	0	0	0	0
Fagales:Myricaceae	Morella		Morella faya (Ait.) Wilbur	GBIF	Myrica vel Morella sp.	0	0	0	0	1	0	0	0	0	0	0	0	0	0	0	0	0	1	0	0	0	0	0	0	0	0
Fagales:Myricaceae	Morella		Morella inodora (W.Bartram) Small	Thompson et al. 1999 (B), PDB, GBIF, FNA	Myrica vel Morella sp.	0	0	0	0	1	0	0	0	1	0	0	0	0	0	0	0	0	0	0	0	0	0	0	0	0	0
Fagales:Myricaceae	Morella		Morella nana (A.Chev.) J.Herbert	Fang et al. 2011, FOC, GBIF	Myrica vel Morella sp.	0	0	0	0	0	0	0	0	0	0	0	1	1	0	0	0	0	0	0	0	0	0	0	0	0	0
Fagales:Myricaceae	Morella		Morella punctata (Griseb.) J.Herbert	GBIF	Myrica vel Morella sp.	0	0	0	1	0	0	0	0	0	0	0	0	0	0	0	0	0	0	0	0	0	0	0	0	0	0
Fagales:Myricaceae	Morella		Morella rubra (Siebold & Zucc.) xxx	Fang et al. 2011, FOC, GBIF	Myrica vel Morella sp.	0	0	0	1	1	1	0	0	0	0	0	1	1	0	0	0	0	0	0	0	0	0	0	0	0	0
Fagales:Myricaceae	Myrica		Myrica hartwegii S.Watson	PDB, GBIF, FNA	Myrica vel Morella sp.	0	0	0	0	0	0	0	0	0	0	0	0	0	0	0	0	0	1	1	0	0	0	0	0	0	0
Fagales:Myricaceae	Myrica		Myrica heterophylla Raf. [= Morella caroliniensis]	Thompson et al. 1999 (B), PDB, GBIF, FNA	Myrica vel Morella sp.	0	0	0	0	1	0	0	0	0	0	0	0	0	0	0	0	0	0	0	0	0	0	0	0	0	0
Fagales:Myricaceae	Myrica		Myrica pensylvanica Mirbel [= Morella caroliniensis]	PDB, GBIF, FNA	Myrica vel Morella sp.	0	0	0	0	1	0	0	0	1	0	0	0	0	0	0	0	0	0	0	0	0	0	0	0	0	0
Fagales:Myricaceae	Myrica		Myrica gale L.	Thompson et al. 1999 (B), PDB, GBIF, FNA	Myrica vel Morella sp.	0	0	0	0	0	1	1	0	1	1	0	0	0	0	0	0	0	0	0	0	0	0	0	0	0	0
Fagales:Myricaceae	Myrica		Myrica hartwegii S.Watson	Thompson et al. 1999 (B), PDB, GBIF, FNA	Myrica vel Morella sp.	0	0	0	0	0	0	0	0	0	0	0	0	0	0	0	0	0	1	1	0	0	0	0	0	0	0
Geraniales: Geraniaceae	Erodium			GBIF	Erodium sp.	0	0	0	1	1	1	1	0	1	1	0	1	1	1	1	0	0	1	1	0	0	0	1	1	1	1
Myrtales: Lythraceae	Decodon		Decodon verticillatus (L.) Elliott	FNA, PDB, GBIF	Decodon sp.	0	0	0	0	1	1	0	1	1	0	0	0	0	0	0	0	0	0	0	0	0	0	0	0	0	0
Myrteales: Onagraceae	Ludwigia			GBIF	Ludwigia sp.	1	1	1	1	1	1	1	1	1	0	0	1	1	1	0	0	0	1	1	0	0	0	1	1	1	1
Sapindales:Sapindaceae:Hippocastanoideae	Acer	Arguta clade	Acer acuminatum Wall. Ex D.Don	GBIF, Grimm et al. 2007, Van Geldern et al. 1994	Acer sp.	0	0	0	0	1	1	0	0	1	1	0	1	1	0	0	0	0	0	0	0	0	0	0	0	0	0
Sapindales:Sapindaceae:Hippocastanoideae	Acer	Arguta clade	Acer argutum Maxim.	GBIF, FOJ, Grimm et al. 2007, Van Geldern et al. 1994	Acer sp.	0	0	0	0	1	1	0	0	1	1	0	0	0	0	0	0	0	0	0	0	0	0	0	0	0	0
Sapindales:Sapindaceae:Hippocastanoideae	Acer	Arguta clade	Acer barbinerve Maxim.	Fang et al. 2011, FOC, Grimm et al. 2007, Van Geldern et al. 1994	Acer sp.	0	0	0	0	0	0	0	0	0	0	0	0	0	1	1	1	0	0	0	0	0	0	0	0	0	0
Sapindales:Sapindaceae:Hippocastanoideae	Acer	Arguta clade	Acer stachyophyllum Hiern in J.D.Hooker + ssp. Stachyophyllum + ssp. Betulifolium (Maxim.) P.C. de Jong	Fang et al. 2011, FOC, Grimm et al. 2007, Van Geldern et al. 1994	Acer sp.	0	0	0	0	1	1	0	0	0	0	0	1	1	0	1	1	1	0	0	0	0	0	0	1	0	0
Sapindales:Sapindaceae:Hippocastanoideae	Acer	Cissifolia clade	Acer henryi Pax	Fang et al. 2011, FOC	Acer sp.	0	0	0	0	1	1	0	0	0	0	0	1	1	0	1	1	0	0	0	0	0	0	0	1	0	0
Sapindales:Sapindaceae:Hippocastanoideae	Acer	Cissifolia clade	Acer cissifolium (Sieb. & Zucc.) K.Koch	GBIF, FOJ, Van Geldern et al. 1994	Acer sp.	0	0	0	0	1	1	0	0	1	0	0	0	0	0	0	0	0	0	0	0	0	0	0	0	0	0
Sapindales:Sapindaceae:Hippocastanoideae	Acer	Ginnala clade	Acer semenovii Regel & Hed.	Browicz, 1982 (1)	Acer sp.	0	0	0	0	0	0	0	0	0	0	0	0	0	0	0	0	0	1	1	1	1	1	0	1	0	0
Sapindales:Sapindaceae:Hippocastanoideae	Acer	Ginnala clade	Acer tataricum L.	Browicz, 1982 (1), Fang et al. 2011, FOC	Acer sp.	0	0	0	0	1	1	0	0	1	1	0	1	0	1	1	1	0	1	1	1	1	0	0	0	0	0
Sapindales:Sapindaceae:Hippocastanoideae	Acer	Glabrum clade	Acer glabrum Torr.	Thompson et al. 1999 (B), Grimm et al. 2007, Van Geldern et al. 1994	Acer sp.	0	0	0	0	1	1	1	0	1	1	0	0	0	0	0	0	1	1	1	0	1	1	0	1	0	0
Sapindales:Sapindaceae:Hippocastanoideae	Acer	sect Wardiana (VG), sect. Macrantha (FOC)	Acer wardii W.W.Smith	Fang et al. 2011, FOC	Acer sp.	0	0	0	0	0	0	0	0	0	0	0	1	1	0	0	0	0	0	0	0	0	0	0	0	0	0
Sapindales:Sapindaceae:Hippocastanoideae	Acer	sect. Acer	Acer barbatum Michx.	Thompson et al. 1999 (B), Grimm et al. 2007, Van Geldern et al. 1994	Acer sp.	0	0	0	0	1	0	0	0	0	0	0	0	0	0	0	0	0	0	0	0	0	0	0	0	0	0
Sapindales:Sapindaceae:Hippocastanoideae	Acer	sect. Acer	Acer caesium Wall. ex Brandis A. c. ssp. Giraldii	Fang et al. 2011, FOC, Grimm et al. 2007, Van Geldern et al. 1994	Acer sp.	0	0	0	0	0	0	0	0	0	0	0	0	1	1	1	1	0	0	0	0	0	0	0	0	0	0
Sapindales:Sapindaceae:Hippocastanoideae	Acer	sect. Acer	Acer grandidentatum Nutt.	Thompson et al. 1999 (B), Grimm et al. 2007, Van Geldern et al. 1994	Acer sp.	0	0	0	0	1	1	0	0	1	1	0	0	0	0	0	0	0	1	1	0	1	0	0	0	0	0
Sapindales:Sapindaceae:Hippocastanoideae	Acer	sect. Acer	Acer heldreichii Orph. ex Boiss. + ssp. trauttveteri (Medw.) A.E.Murray Kalmia	Browicz 1982 (1), Grimm et al. 2007, Van Geldern et al. 1994	Acer sp.	0	0	0	0	1	1	0	0	1	1	0	0	0	0	0	0	1	1	1	0	0	0	0	0	0	0
Sapindales:Sapindaceae:Hippocastanoideae	Acer	sect. Acer	Acer hyrcanum Fischer & C.A.Meyer + ssp. Stevenii (Pojark.) E.Murray	Browicz 1982 (1), Grimm et al. 2007, Van Geldern et al. 1994	Acer sp.	0	0	0	0	1	1	0	1	1	1	0	0	0	0	0	0	0	1	1	0	0	0	0	1	0	0
Sapindales:Sapindaceae:Hippocastanoideae	Acer	sect. Acer	Acer monspessulanum L. (=A. Ibericum M.Bieb)	Browicz 1982 (1), Grimm et al. 2007, Van Geldern et al. 1994	Acer sp.	0	0	0	0	1	1	0	1	1	1	0	0	0	0	0	0	0	1	1	1	1	0	0	1	1	0
Sapindales:Sapindaceae:Hippocastanoideae	Acer	sect. Acer	Acer obtusifolium Sm. (=Acer syriacum Boiss. & Gaill.)	Browicz 1982 (1), Grimm et al. 2007, Van Geldern et al. 1994	Acer sp.	0	0	0	0	0	0	0	0	0	0	0	0	0	0	0	0	0	1	1	0	0	0	1	0	0	0
Sapindales:Sapindaceae:Hippocastanoideae	Acer	sect. Acer	Acer opalus L.	GBIF	Acer sp.	0	0	0	0	1	1	0	0	1	1	0	0	0	0	0	0	0	1	1	0	0	0	0	1	0	0
Sapindales:Sapindaceae:Hippocastanoideae	Acer	sect. Acer	Acer pseudoplatanus L.	EUFORGEN	Acer sp.	0	0	0	0	1	1	0	0	1	1	0	0	0	0	0	0	0	1	1	0	0	0	0	0	0	0
Sapindales:Sapindaceae:Hippocastanoideae	Acer	sect. Acer	Acer saccharum Marshall +A. s. ssp. Nigrum (F.Michx.) + A. s. ssp. leucoderme Smal	Thompson et al. 1999 (B)	Acer sp.	0	0	0	0	1	1	0	1	1	0	0	0	0	0	0	0	0	0	0	0	0	0	0	0	0	0
Sapindales:Sapindaceae:Hippocastanoideae	Acer	sect. Acer	Acer sempervirens L.	Browicz 1982 (1), Grimm et al. 2007, Van Geldern et al. 1994	Acer sp.	0	0	0	0	0	0	0	0	0	0	0	0	0	0	0	0	0	1	1	0	0	0	0	0	0	0
Sapindales:Sapindaceae:Hippocastanoideae	Acer	sect. Acer	Acer velutinum Boiss.	Browicz 1982 (1), Grimm et al. 2007, Van Geldern et al. 1994	Acer sp.	0	0	0	0	1	1	0	0	1	1	0	0	0	0	0	0	0	1	0	0	0	0	0	0	0	0
Sapindales:Sapindaceae:Hippocastanoideae	Acer	sect. Acer	Acer turkestanicum Pax.	Browicz 1982 (1), Grimm et al. 2007, Van Geldern et al. 1994	Acer sp.	0	0	0	0	0	0	0	0	1	1	0	0	0	0	0	0	0	1	1	1	1	0	0	0	0	0
Sapindales:Sapindaceae:Hippocastanoideae	Acer	sect. Hyptiocarpa	Acer garrettii Craib	GBIF, Van Geldern et al. 1994	Acer sp.	0	0	0	1	0	0	0	0	0	0	0	1	1	0	0	0	0	0	0	0	0	0	0	0	0	0
Sapindales:Sapindaceae:Hippocastanoideae	Acer	sect. Hyptiocarpa	Acer laurinum Hasskarl	Fang et al. 2011, FOC	Acer sp.	0	0	0	1	1	1	0	0	0	0	0	1	1	0	0	0	0	0	0	0	0	0	0	1	0	0
Sapindales:Sapindaceae:Hippocastanoideae	Acer	sect. Hyptiocarpa	Acer pinnatinervium Merr.	Fang et al. 2011, FOC	Acer sp.	0	0	0	0	0	0	0	0	0	0	0	1	1	0	0	0	0	0	0	0	0	0	0	0	0	0
Sapindales:Sapindaceae:Hippocastanoideae	Acer	sect. Indivisa	Acer caprinifolium Sieb. & Zucc.	GBIF, FOJ, Van Geldern et al. 1994	Acer sp.	0	0	0	0	1	1	0	0	1	0	0	0	0	0	0	0	0	0	0	0	0	0	0	0	0	0
Sapindales:Sapindaceae:Hippocastanoideae	Acer	sect. Lithocarpa	Acer kungshanense W.P.Fang & C.Y.Chang	Fang et al. 2011, FOC	Acer sp.	0	0	0	0	0	0	0	0	0	0	0	1	1	0	0	0	0	0	0	0	0	0	0	0	0	0
Sapindales:Sapindaceae:Hippocastanoideae	Acer	sect. Lithocarpa	Acer lungshengense W.P.Fang & L.C.Hu	Fang et al. 2011, FOC	Acer sp.	0	0	0	0	1	1	0	0	0	0	0	1	1	0	0	0	0	0	0	0	0	0	0	0	0	0
Sapindales:Sapindaceae:Hippocastanoideae	Acer	sect. Lithocarpa	Acer thomsonii Miq.	Fang et al. 2011, FOC	Acer sp.	0	0	0	1	0	0	0	0	0	0	0	1	1	0	0	0	0	0	0	0	0	0	0	0	0	0
Sapindales:Sapindaceae:Hippocastanoideae	Acer	sect. Lithocarpa	Acer tsinglingense W.P.Fang & C.C.Hsieh	Fang et al. 2011, FOC	Acer sp.	0	0	0	0	1	0	0	0	0	0	0	1	1	0	1	1	0	0	0	0	0	0	0	1	0	0
Sapindales:Sapindaceae:Hippocastanoideae	Acer	sect. Lithocarpa	Acer yangbiense Y.S.Chen & Q.E.Yang	Y.S.Chen & Q.E.Yang 2003, FOC	Acer sp.	0	0	0	0	0	0	0	0	0	0	0	1	1	0	0	0	0	0	0	0	0	0	0	0	0	0
Sapindales:Sapindaceae:Hippocastanoideae	Acer	sect. Lithocarpa	Acer diabolicum Blume	FOJ, GBIF	Acer sp.	0	0	0	0	1	1	0	0	0	0	0	0	0	0	0	0	0	0	0	0	0	0	0	0	0	0
Sapindales:Sapindaceae:Hippocastanoideae	Acer	sect. Lithocarpa	Acer leipoense W.P.Fang & T.P.Soong	Fang et al. 2011, FOC	Acer sp.	0	0	0	0	0	0	0	0	0	0	0	1	1	0	0	0	0	0	0	0	0	0	0	0	0	0
Sapindales:Sapindaceae:Hippocastanoideae	Acer	sect. Lithocarpa	Acer macrophyllum Pursh	Thompson et al. 1999 (B)	Acer sp.	0	0	0	0	0	1	1	0	0	0	0	0	0	0	0	0	0	0	1	0	0	0	0	0	0	0
Sapindales:Sapindaceae:Hippocastanoideae	Acer	sect. Lithocarpa	Acer sinopurpurascens Cheng	Fang et al. 2011, FOC	Acer sp.	0	0	0	0	1	1	0	0	0	0	0	1	1	0	0	0	0	0	0	0	0	0	0	0	0	0
Sapindales:Sapindaceae:Hippocastanoideae	Acer	sect. Lithocarpa	Acer sterculiaceum Wallich	Fang et al. 2011, FOC	Acer sp.	0	0	0	0	1	1	0	0	0	0	0	1	1	0	0	0	0	0	0	0	0	0	0	1	0	0
Sapindales:Sapindaceae:Hippocastanoideae	Acer	sect. Macrantha	Acer chienii Hu & W.C.Cheng	Fang et al. 2011, FOC	Acer sp.	0	0	0	0	0	0	0	0	0	0	0	1	1	0	1	1	0	0	0	0	0	0	0	1	0	0
Sapindales:Sapindaceae:Hippocastanoideae	Acer	sect. Macrantha	Acer forrestii Diels	Fang et al. 2011, FOC	Acer sp.	0	0	0	0	0	0	0	0	0	0	0	1	1	0	1	1	0	0	0	0	0	0	1	0	0	0
Sapindales:Sapindaceae:Hippocastanoideae	Acer	sect. Macrantha	Acer komarovii Pojark.	Fang et al. 2011, FOC	Acer sp.	0	0	0	0	0	0	0	0	0	0	0	0	0	1	1	1	0	0	0	0	0	0	0	1	0	0
Sapindales:Sapindaceae:Hippocastanoideae	Acer	sect. Macrantha	Acer laxiflorum Pax	Fang et al. 2011, FOC	Acer sp.	0	0	0	0	1	0	0	0	0	0	0	1	1	0	1	1	0	0	0	0	0	0	0	1	0	0
Sapindales:Sapindaceae:Hippocastanoideae	Acer	sect. Macrantha	Acer maximowiczii Pax	Fang et al. 2011, FOC	Acer sp.	0	0	0	0	1	1	0	0	0	0	0	1	1	1	1	1	0	0	0	0	0	0	0	1	0	0
Sapindales:Sapindaceae:Hippocastanoideae	Acer	sect. Macrantha	Acer metcalfii Rehder	Fang et al. 2011, FOC	Acer sp.	0	0	0	0	1	1	0	0	0	0	0	1	1	0	0	0	0	0	0	0	0	0	0	0	0	0
Sapindales:Sapindaceae:Hippocastanoideae	Acer	sect. Macrantha	Acer morrisonense Hayata	Fang et al. 2011, FOC	Acer sp.	0	0	0	1	1	1	1	0	0	0	0	1	1	0	0	0	0	0	0	0	0	0	0	0	0	0
Sapindales:Sapindaceae:Hippocastanoideae	Acer	sect. Macrantha	Acer capillipes Maxim. ex Miq.	GBIF, FOJ, Van Geldern et al. 1994	Acer sp.	0	0	0	0	1	1	0	0	1	0	0	0	0	0	0	0	0	0	0	0	0	0	0	0	0	0
Sapindales:Sapindaceae:Hippocastanoideae	Acer	sect. Macrantha	Acer crataegifolium Sieb. & Zucc.	GBIF, FOJ, Van Geldern et al. 1994	Acer sp.	0	0	0	0	1	1	0	0	1	0	0	0	0	0	0	0	0	0	0	0	0	0	0	0	0	0
Sapindales:Sapindaceae:Hippocastanoideae	Acer	sect. Macrantha	Acer davidii Franch. + ssp. Davidii + ssp. Grosseri (Pax) P.C. de Jong	Fang et al. 2011, FOC	Acer sp.	0	0	0	0	1	1	0	0	0	0	0	1	1	0	1	1	1	0	0	0	0	0	1	1	0	0
Sapindales:Sapindaceae:Hippocastanoideae	Acer	sect. Macrantha	Acer pensylvanicum L.	Thompson et al. 1999 (B), PDB	Acer sp.	0	0	0	0	1	1	0	1	1	1	0	0	0	0	0	0	0	0	0	0	0	0	0	0	0	0
Sapindales:Sapindaceae:Hippocastanoideae	Acer	sect. Macrantha	Acer caudatifolium Hayata	Fang et al. 2011, FOC	Acer sp.	0	0	0	0	1	1	0	0	0	0	0	1	1	0	0	0	0	0	0	0	0	0	0	0	0	0
Sapindales:Sapindaceae:Hippocastanoideae	Acer	sect. Macrantha	Acer pectinatum Wall. Ex G.Nicholson	Fang et al. 2011, FOC, GBIF	Acer sp.	0	0	0	0	1	0	0	0	0	0	0	1	1	0	1	1	0	0	0	0	0	0	0	0	0	0
Sapindales:Sapindaceae:Hippocastanoideae	Acer	sect. Macrantha	Acer sikkimense Miq.	Fang et al. 2011, FOC	Acer sp.	0	0	0	0	0	0	0	0	0	0	0	1	1	0	1	1	0	0	0	0	0	0	1	0	0	0
Sapindales:Sapindaceae:Hippocastanoideae	Acer	sect. Macrantha	Acer tegmentosum Maxim.	Fang et al. 2011, FOC	Acer sp.	0	0	0	0	1	0	0	0	0	0	0	1	0	1	1	1	0	0	0	0	0	0	0	0	0	0
Sapindales:Sapindaceae:Hippocastanoideae	Acer	sect. Macrantha	Acer micranthum Sieb. & Zucc.	GBIF, FOJ, Van Geldern et al. 1994	Acer sp.	0	0	0	0	1	1	0	0	1	1	0	0	0	0	0	0	0	0	0	0	0	0	0	0	0	0
Sapindales:Sapindaceae:Hippocastanoideae	Acer	sect. Macrantha	Acer morifolium Koidzumi	GBIF, FOJ, Van Geldern et al. 1994	Acer sp.	0	0	0	0	1	0	0	0	0	0	0	0	0	0	0	0	0	0	0	0	0	0	0	0	0	0
Sapindales:Sapindaceae:Hippocastanoideae	Acer	sect. Macrantha	Acer rubescens Hayata	GBIF, Van Geldern et al. 1994	Acer sp.	0	0	0	0	1	1	0	0	0	0	0	1	1	0	0	0	0	0	0	0	0	0	0	0	0	0
Sapindales:Sapindaceae:Hippocastanoideae	Acer	sect. Macrantha	Acer rufinerve Sieb. & Zucc.	GBIF, FOJ, Van Geldern et al. 1994	Acer sp.	0	0	0	0	1	1	0	0	1	1	0	0	0	0	0	0	0	0	0	0	0	0	0	0	0	0
Sapindales:Sapindaceae:Hippocastanoideae	Acer	sect. Macrantha	Acer tschonoskii Maxim.	GBIF, FOJ, Van Geldern et al. 1994	Acer sp.	0	0	0	0	1	1	0	0	1	1	0	0	0	0	0	0	0	0	0	0	0	0	0	0	0	0
Sapindales:Sapindaceae:Hippocastanoideae	Acer	sect. Negundo	Acer negundo L.	Thompson et al. 1999 (B)	Acer sp.	0	0	0	0	1	1	0	1	1	1	0	1	1	1	1	0	0	1	1	0	0	0	0	0	0	0
Sapindales:Sapindaceae:Hippocastanoideae	Acer	sect. Palmata	Acer chingii Hu	Fang et al. 2011, FOC	Acer sp.	0	0	0	0	1	1	0	0	0	0	0	1	1	0	0	0	0	0	0	0	0	0	0	0	0	0
Sapindales:Sapindaceae:Hippocastanoideae	Acer	sect. Palmata	Acer flabellatum Rehder	Fang et al. 2011, FOC	Acer sp.	0	0	0	0	1	1	0	0	0	0	0	1	1	0	1	1	0	0	0	0	0	0	0	0	0	0
Sapindales:Sapindaceae:Hippocastanoideae	Acer	sect. Palmata	Acer hilaense Hu & W.C.Cheng	Fang et al. 2011, FOC	Acer sp.	0	0	0	0	0	0	0	0	0	0	0	1	1	0	0	0	0	0	0	0	0	0	0	0	0	0
Sapindales:Sapindaceae:Hippocastanoideae	Acer	sect. Palmata	Acer kuomeii W.P.Fang & M.Y.Fang	Fang et al. 2011, FOC, GBIF	Acer sp.	0	0	0	0	1	0	0	0	0	0	0	1	1	0	0	0	0	0	0	0	0	0	0	0	0	0
Sapindales:Sapindaceae:Hippocastanoideae	Acer	sect. Palmata	Acer kwangnanense Hu & Cheng	Fang et al. 2011, FOC	Acer sp.	0	0	0	1	0	0	0	0	0	0	0	1	1	0	0	0	0	0	0	0	0	0	0	0	0	0
Sapindales:Sapindaceae:Hippocastanoideae	Acer	sect. Palmata	Acer pubinerve Rehder	Fang et al. 2011, FOC	Acer sp.	0	0	0	0	1	1	0	0	0	0	0	1	0	0	0	0	0	0	0	0	0	0	0	0	0	0
Sapindales:Sapindaceae:Hippocastanoideae	Acer	sect. Palmata	Acer pubipetiolatum Rehder + ssp. Pingpienense W.P.Fang & W.K.Hu	Fang et al. 2011, FOC	Acer sp.	0	0	0	0	1	1	0	0	0	0	0	1	1	0	0	0	0	0	0	0	0	0	0	0	0	0
Sapindales:Sapindaceae:Hippocastanoideae	Acer	sect. Palmata	Acer serrulatum Hayata	Fang et al. 2011, FOC	Acer sp.	0	0	0	0	1	1	1	0	0	0	0	1	1	0	0	0	0	0	0	0	0	0	0	0	0	0
Sapindales:Sapindaceae:Hippocastanoideae	Acer	sect. Palmata	Acer sinense Pax	Fang et al. 2011, FOC	Acer sp.	0	0	0	0	1	1	0	0	0	0	0	1	1	0	0	0	0	0	0	0	0	0	0	0	0	0
Sapindales:Sapindaceae:Hippocastanoideae	Acer	sect. Palmata	Acer wilsonii Rehder	Fang et al. 2011, FOC	Acer sp.	0	0	0	0	1	1	0	0	0	0	0	1	1	0	0	0	0	0	0	0	0	0	0	0	0	0
Sapindales:Sapindaceae:Hippocastanoideae	Acer	sect. Palmata (G)	Acer circinatum Pursh	Thompson et al. 1999 (B), PDB	Acer sp.	0	0	0	0	0	1	1	0	0	1	0	0	0	0	0	0	0	1	1	0	0	0	0	0	0	0
Sapindales:Sapindaceae:Hippocastanoideae	Acer	sect. Palmata (G)	Acer japonicum Thunb.	GBIF, FOJ	Acer sp.	0	0	0	0	1	1	0	0	1	1	0	0	0	0	0	0	0	0	0	0	0	0	0	0	0	0
Sapindales:Sapindaceae:Hippocastanoideae	Acer	sect. Palmata (G)	Acer pseudosieboldianum (Pax) Komarov	Fang et al. 2011, FOC, GBIF, woody plants of Korea	Acer sp.	0	0	0	0	1	0	0	0	0	0	0	1	0	1	1	1	0	0	0	0	0	0	0	0	0	0
Sapindales:Sapindaceae:Hippocastanoideae	Acer	sect. Palmata (VG)	Acer oliverianum Pax (=? A. olivaceum Fang & Chiu?, = A. wuyanense Fang & Wu)	Fang et al. 2011, FOC	Acer sp.	0	0	0	0	1	1	0	0	0	0	0	1	1	0	0	0	0	0	0	0	0	0	0	0	0	0
Sapindales:Sapindaceae:Hippocastanoideae	Acer	sect. Palmata (VG)	Acer calcaratum Gagnep.	Fang et al. 2011, FOC	Acer sp.	0	0	0	1	0	0	0	0	0	0	0	1	0	0	0	0	0	0	0	0	0	0	0	0	0	0
Sapindales:Sapindaceae:Hippocastanoideae	Acer	sect. Palmata (VG)	Acer campbellii J.D.Hooker & Thomson (=?A. chapaense Gagnep.?, =?A. mapiense Fang?, =?A. schneiderianum Pax & Hoffmann?, =A.yaoshanicum W.P.Fang)	Fang et al. 2011, FOC	Acer sp.	0	0	0	0	1	0	0	0	0	0	0	1	1	0	1	1	0	0	0	0	0	0	0	0	0	0
Sapindales:Sapindaceae:Hippocastanoideae	Acer	sect. Palmata (VG)	Acer ceriferum Rehder	Fang et al. 2011, FOC	Acer sp.	0	0	0	1	1	1	0	0	0	0	0	1	1	0	1	1	0	0	0	0	0	0	0	1	0	0
Sapindales:Sapindaceae:Hippocastanoideae	Acer	sect. Palmata (VG)	Acer confertifolium Merr. & F.P.Metcalf	Fang et al. 2011, FOC	Acer sp.	0	0	0	0	1	1	1	0	0	0	0	0	0	0	0	0	0	0	0	0	0	0	0	0	0	0
Sapindales:Sapindaceae:Hippocastanoideae	Acer	sect. Palmata (VG)	Acer cordatum Pax	Fang et al. 2011, FOC	Acer sp.	0	0	0	0	1	1	0	0	0	0	0	1	1	0	0	0	0	0	0	0	0	0	0	0	0	0
Sapindales:Sapindaceae:Hippocastanoideae	Acer	sect. Palmata (VG)	Acer crassum Hu & W.C.Cheng	Fang et al. 2011, FOC	Acer sp.	0	0	0	1	0	0	0	0	0	0	0	1	1	0	0	0	0	0	0	0	0	0	0	0	0	0
Sapindales:Sapindaceae:Hippocastanoideae	Acer	sect. Palmata (VG)	Acer duplicatoserratum Hayata, A. d. var. Chinense C.S.Chang (=?A. pubipalmatum Fang?)	Fang et al. 2011, FOC	Acer sp.	0	0	0	0	1	1	1	0	0	0	0	1	1	0	0	0	0	0	0	0	0	0	0	0	0	0
Sapindales:Sapindaceae:Hippocastanoideae	Acer	sect. Palmata (VG)	Acer elegantulum W.P.Fang & M.Y.Fang	Fang et al. 2011, FOC	Acer sp.	0	0	0	1	1	0	0	0	0	0	0	1	0	0	0	0	0	0	0	0	0	0	0	0	0	0
Sapindales:Sapindaceae:Hippocastanoideae	Acer	sect. Palmata (VG)	Acer erianthum Schwerin	Fang et al. 2011, FOC	Acer sp.	0	0	0	0	1	1	0	0	0	0	0	1	1	0	1	1	0	0	0	0	0	0	0	0	0	0
Sapindales:Sapindaceae:Hippocastanoideae	Acer	sect. Palmata (VG)	Acer fabri Hance	Fang et al. 2011, FOC	Acer sp.	0	1	0	1	1	1	0	0	0	0	0	1	1	0	0	0	0	0	0	0	0	0	1	0	0	0
Sapindales:Sapindaceae:Hippocastanoideae	Acer	sect. Palmata (VG)	Acer fenzelianum Handel-Mazetti	Fang et al. 2011, FOC	Acer sp.	0	0	0	0	0	0	0	0	0	0	0	1	0	0	0	0	0	0	0	0	0	0	0	0	0	0
Sapindales:Sapindaceae:Hippocastanoideae	Acer	sect. Palmata (VG)	Acer gracilifolium W.P.Fang & C.C.Fu	Fang et al. 2011, FOC	Acer sp.	0	0	0	0	0	0	0	0	0	0	0	1	1	0	0	0	0	0	0	0	0	0	0	0	0	0
Sapindales:Sapindaceae:Hippocastanoideae	Acer	sect. Palmata (VG)	Acer kweilinense W.P.Fang & M.Y.Fang	Fang et al. 2011, FOC	Acer sp.	0	0	0	0	1	1	0	0	0	0	0	1	0	0	0	0	0	0	0	0	0	0	0	0	0	0
Sapindales:Sapindaceae:Hippocastanoideae	Acer	sect. Palmata (VG)	Acer laevigatum Wall.	Fang et al. 2011, FOC	Acer sp.	0	0	0	1	1	1	0	0	0	0	0	1	1	0	0	0	0	0	0	0	0	0	0	0	0	0
Sapindales:Sapindaceae:Hippocastanoideae	Acer	sect. Palmata (VG)	Acer liganense W.P.Fang & P.L.Chiu	Fang et al. 2011, FOC	Acer sp.	0	0	0	0	1	0	0	0	0	0	0	0	0	0	0	0	0	0	0	0	0	0	0	0	0	0
Sapindales:Sapindaceae:Hippocastanoideae	Acer	sect. Palmata (VG)	Acer miaoshanicum Tsoong	Fang et al. 2011, FOC	Acer sp.	0	0	0	0	1	1	0	0	0	0	0	1	1	0	0	0	0	0	0	0	0	0	0	0	0	0
Sapindales:Sapindaceae:Hippocastanoideae	Acer	sect. Palmata (VG)	Acer oligocarpum W.P.Fang & L.C.Hu	Fang et al. 2011, FOC	Acer sp.	0	0	0	0	0	0	0	0	0	0	0	1	1	0	0	0	0	0	0	0	0	0	0	0	0	0
Sapindales:Sapindaceae:Hippocastanoideae	Acer	sect. Palmata (VG)	Acer palmatum Thunb.	Fang et al. 2011, FOC, GBIF	Acer sp.	0	0	0	0	1	1	0	0	1	0	0	1	1	0	0	0	0	0	0	0	0	0	0	0	0	0
Sapindales:Sapindaceae:Hippocastanoideae	Acer	sect. Palmata (VG)	Acer pauciflorum Fang	Fang et al. 2011, FOC	Acer sp.	0	0	0	0	1	0	0	0	0	0	0	0	0	0	0	0	0	0	0	0	0	0	0	0	0	0
Sapindales:Sapindaceae:Hippocastanoideae	Acer	sect. Palmata (VG)	Acer poliophyllum W.P.Fang & Y.T.Wu	Fang et al. 2011, FOC	Acer sp.	0	0	0	0	0	0	0	0	0	0	0	1	1	0	0	0	0	0	0	0	0	0	0	0	0	0
Sapindales:Sapindaceae:Hippocastanoideae	Acer	sect. Palmata (VG)	Acer shirasawanum Koidzumi	GBIF, FOJ	Acer sp.	0	0	0	0	1	1	0	0	1	1	0	0	0	0	0	0	0	0	0	0	0	0	0	0	0	0
Sapindales:Sapindaceae:Hippocastanoideae	Acer	sect. Palmata (VG)	Acer sino-oblongum F.P.Metcalf	Fang et al. 2011, FOC	Acer sp.	0	0	0	0	0	0	0	0	0	0	0	1	0	0	0	0	0	0	0	0	0	0	0	0	0	0
Sapindales:Sapindaceae:Hippocastanoideae	Acer	sect. Palmata (VG)	Acer tonkinense Lecomte	Fang et al. 2011, FOC	Acer sp.	0	0	0	0	1	0	0	0	0	0	0	1	1	0	0	0	0	0	0	0	0	0	0	0	0	0
Sapindales:Sapindaceae:Hippocastanoideae	Acer	sect. Palmata (VG)	Acer tutcheri Duthie (=? A. lanpingense Fang & Fang?)	Fang et al. 2011, FOC	Acer sp.	0	0	0	1	1	1	1	0	0	0	0	1	1	0	0	0	0	0	0	0	0	0	0	0	0	0
Sapindales:Sapindaceae:Hippocastanoideae	Acer	sect. Palmata (VG), sect. Oblonga (FOC)	Acer lucidum F.P.Metcalf	Fang et al. 2011, FOC	Acer sp.	0	0	0	0	1	1	0	0	0	0	0	0	1	0	0	0	0	0	0	0	0	0	0	0	0	0
Sapindales:Sapindaceae:Hippocastanoideae	Acer	sect. Palmata (VG), sect. Oblonga (FOC)	Acer yinkunii W.P.Fang	Fang et al. 2011, FOC	Acer sp.	0	0	0	0	1	1	0	0	0	0	0	0	1	0	0	0	0	0	0	0	0	0	0	0	0	0
Sapindales:Sapindaceae:Hippocastanoideae	Acer	sect. Parviflora	Acer caudatum Wall.	Fang et al. 2011, FOC	Acer sp.	0	0	0	0	1	0	0	0	0	0	0	1	1	1	1	1	1	0	0	0	0	0	0	1	0	0
Sapindales:Sapindaceae:Hippocastanoideae	Acer	sect. Parviflora	Acer distylum Sieb. & Zucc.	GBIF, FOJ, Van Geldern et al. 1994	Acer sp.	0	0	0	0	1	1	0	0	1	0	0	0	0	0	0	0	0	0	0	0	0	0	0	0	0	0
Sapindales:Sapindaceae:Hippocastanoideae	Acer	sect. Parviflora	Acer nipponicum Hara	GBIF, FOJ, Van Geldern et al. 1994	Acer sp.	0	0	0	0	1	1	0	0	1	0	0	0	0	0	0	0	0	0	0	0	0	0	0	0	0	0
Sapindales:Sapindaceae:Hippocastanoideae	Acer	sect. Parviflora	Acer robustum Pax	GBIF, Van Geldern et al. 1994	Acer sp.	0	0	0	0	1	1	0	0	0	0	0	1	1	0	0	0	0	0	0	0	0	0	0	0	0	0
Sapindales:Sapindaceae:Hippocastanoideae	Acer	sect. Parviflora	Acer shangzeense Fang & Soong	GBIF, Van Geldern et al. 1994	Acer sp.	0	0	0	0	1	0	0	0	0	0	0	1	0	0	0	0	0	0	0	0	0	0	0	0	0	0
Sapindales:Sapindaceae:Hippocastanoideae	Acer	sect. Parviflora	Acer spicatum Lam.	Thompson et al. 1999 (B)	Acer sp.	0	0	0	0	1	1	0	1	1	1	0	0	0	0	0	0	0	0	0	0	0	0	0	0	0	0
Sapindales:Sapindaceae:Hippocastanoideae	Acer	sect. Parviflora	Acer taipuense Fang	GBIF, Van Geldern et al. 1994	Acer sp.	0	0	0	0	1	0	0	0	0	0	0	0	0	0	0	0	0	0	0	0	0	0	0	0	0	0
Sapindales:Sapindaceae:Hippocastanoideae	Acer	sect. Pentaphylla	Acer albopurpurascens Hayata	Fang et al. 2011, FOC	Acer sp.	0	0	0	1	1	1	0	0	0	0	0	0	1	0	0	0	0	0	0	0	0	0	0	0	0	0
Sapindales:Sapindaceae:Hippocastanoideae	Acer	sect. Pentaphylla	Acer coriaceifolium H.Lév.	Fang et al. 2011, FOC	Acer sp.	0	0	0	1	1	1	0	0	0	0	0	1	1	0	0	0	0	0	0	0	0	0	0	0	0	0
Sapindales:Sapindaceae:Hippocastanoideae	Acer	sect. Pentaphylla	Acer oblongum Wall. ex DC	Fang et al. 2011, FOC	Acer sp.	0	0	0	0	1	1	0	0	0	0	0	0	1	0	1	1	0	0	0	0	0	0	0	1	0	0
Sapindales:Sapindaceae:Hippocastanoideae	Acer	sect. Pentaphylla	Acer paihengii W.P.Fang	Fang et al. 2011, FOC	Acer sp.	0	0	0	0	0	0	0	0	0	0	0	1	0	0	0	0	0	0	0	0	0	0	0	0	0	0
Sapindales:Sapindaceae:Hippocastanoideae	Acer	sect. Pentaphylla	Acer albopurpurascens Hayata	Fang et al. 2011, FOC	Acer sp.	0	0	0	1	1	1	1	0	0	0	0	1	1	0	0	0	0	0	0	0	0	0	0	0	0	0
Sapindales:Sapindaceae:Hippocastanoideae	Acer	sect. Pentaphylla	Acer buergerianum Miquel incl. 6 varieties	Fang et al. 2011, FOC	Acer sp.	0	0	0	0	1	1	0	0	0	0	0	1	1	0	1	0	0	0	0	0	0	0	0	0	0	0
Sapindales:Sapindaceae:Hippocastanoideae	Acer	sect. Pentaphylla	Acer discolor Maxim.	GBIF, Van Geldern et al. 1994	Acer sp.	0	0	0	0	1	0	0	0	0	0	0	1	0	0	0	0	0	0	0	0	0	0	0	0	0	0
Sapindales:Sapindaceae:Hippocastanoideae	Acer	sect. Pentaphylla	Acer griseum (Franch.) Pax	Fang et al. 2011, FOC	Acer sp.	0	0	0	0	1	1	0	0	0	0	0	1	1	1	1	0	0	0	0	0	0	0	0	1	0	0
Sapindales:Sapindaceae:Hippocastanoideae	Acer	sect. Pentaphylla	Acer mandshuricum Maxim.	Fang et al. 2011, FOC	Acer sp.	0	0	0	0	0	0	0	0	0	0	0	1	1	1	1	0	0	0	0	0	0	0	0	1	0	0
Sapindales:Sapindaceae:Hippocastanoideae	Acer	sect. Pentaphylla	Acer maximoviczianum Miquel	GBIF, FOJ, Van Geldern et al. 1994	Acer sp.	0	0	0	0	1	1	0	0	0	0	0	0	0	0	0	0	0	0	0	0	0	0	0	0	0	0
Sapindales:Sapindaceae:Hippocastanoideae	Acer	sect. Pentaphylla	Acer nikoense Maxim.	Fang et al. 2011, FOC	Acer sp.	0	0	0	0	1	1	0	0	0	0	0	1	1	0	0	0	0	0	0	0	0	0	0	0	0	0
Sapindales:Sapindaceae:Hippocastanoideae	Acer	sect. Pentaphylla	Acer paxii Franch.	Fang et al. 2011, FOC	Acer sp.	0	0	0	0	1	1	0	0	0	0	0	1	1	0	0	0	0	0	0	0	0	0	0	0	0	0
Sapindales:Sapindaceae:Hippocastanoideae	Acer	sect. Pentaphylla	Acer paxii Franch. (=A. fengii Murray)	Fang et al. 2011, FOC	Acer sp.	0	0	0	0	1	1	0	0	0	0	0	1	1	0	0	0	0	0	0	0	0	0	0	0	0	0
Sapindales:Sapindaceae:Hippocastanoideae	Acer	sect. Pentaphylla	Acer pentaphyllum Diesl	Fang et al. 2011, FOC	Acer sp.	0	0	0	0	0	0	0	0	0	0	0	1	1	0	0	0	0	0	0	0	0	0	1	0	0	0
Sapindales:Sapindaceae:Hippocastanoideae	Acer	sect. Pentaphylla	Acer pentapomicum Sterwart ex Brand.	Browicz, 1982 (1)	Acer sp.	0	0	0	0	1	1	0	0	1	1	0	0	0	0	0	0	0	1	1	0	1	1	0	1	0	0
Sapindales:Sapindaceae:Hippocastanoideae	Acer	sect. Pentaphylla	Acer pilosum Maximowicz	Fang et al. 2011, FOC	Acer sp.	0	0	0	0	0	0	0	0	0	0	0	0	1	0	1	1	0	0	0	0	0	0	0	0	0	0
Sapindales:Sapindaceae:Hippocastanoideae	Acer	sect. Pentaphylla	Acer shihweii F.Chun & W.P.Fang	Fang et al. 2011, FOC	Acer sp.	0	0	0	0	0	0	0	0	0	0	0	1	0	0	0	0	0	0	0	0	0	0	0	0	0	0
Sapindales:Sapindaceae:Hippocastanoideae	Acer	sect. Pentaphylla	Acer sutchuenense Franch.	Fang et al. 2011, FOC	Acer sp.	0	0	0	0	1	1	0	0	0	0	0	1	1	0	0	0	0	0	0	0	0	0	0	0	0	0
Sapindales:Sapindaceae:Hippocastanoideae	Acer	sect. Pentaphylla	Acer sycopseoides F.Chun	Fang et al. 2011, FOC	Acer sp.	0	0	0	0	1	1	0	0	0	0	0	1	1	0	0	0	0	0	0	0	0	0	0	0	0	0
Sapindales:Sapindaceae:Hippocastanoideae	Acer	sect. Pentaphylla	Acer triflorum Kom.	Fang et al. 2011, FOC	Acer sp.	0	0	0	0	0	0	0	0	0	0	0	0	0	1	1	1	0	0	0	0	0	0	0	0	0	0
Sapindales:Sapindaceae:Hippocastanoideae	Acer	sect. Pentaphylla	Acer wangchii W.P.Fang	Fang et al. 2011, FOC	Acer sp.	0	0	0	0	1	1	0	0	0	0	0	1	1	0	0	0	0	0	0	0	0	0	0	0	0	0
Sapindales:Sapindaceae:Hippocastanoideae	Acer	sect. Pentaphylla	Acer yuii W.Fang	Fang et al. 2011, FOC	Acer sp.	0	0	0	0	0	0	0	0	0	0	0	0	1	0	1	1	0	0	0	0	0	0	0	1	0	0
Sapindales:Sapindaceae:Hippocastanoideae	Acer	sect. Platanoidea	Acer acutum W.P.Fang	Fang et al. 2011, FOC	Acer sp.	0	0	0	0	1	0	0	0	0	0	0	0	0	0	0	0	0	0	0	0	0	0	0	0	0	0
Sapindales:Sapindaceae:Hippocastanoideae	Acer	sect. Platanoidea	Acer amplum Rehder, incl. 3 var.	Fang et al. 2011, FOC	Acer sp.	0	0	0	0	1	1	0	0	0	0	0	1	1	0	1	1	0	0	0	0	0	0	0	0	0	0
Sapindales:Sapindaceae:Hippocastanoideae	Acer	sect. Platanoidea	Acer chunii W.P.Fang	Fang et al. 2011, FOC	Acer sp.	0	0	0	0	1	1	0	0	0	0	0	1	1	0	0	0	0	0	0	0	0	0	0	0	0	0
Sapindales:Sapindaceae:Hippocastanoideae	Acer	sect. Platanoidea	Acer fulvescens Rehder	Fang et al. 2011, FOC	Acer sp.	0	0	0	0	1	0	0	0	0	0	0	1	1	1	1	1	0	0	0	0	0	0	0	1	0	0
Sapindales:Sapindaceae:Hippocastanoideae	Acer	sect. Platanoidea	Acer miaotaiense Tsoong	Fang et al. 2011, FOC	Acer sp.	0	0	0	0	1	1	0	0	0	0	0	1	1	0	1	1	0	0	0	0	0	0	0	1	0	0
Sapindales:Sapindaceae:Hippocastanoideae	Acer	sect. Platanoidea	Acer shenkanense W.P.Fang & C.C.Fu	Fang et al. 2011, FOC	Acer sp.	0	0	0	0	1	0	0	0	0	0	0	1	1	1	1	1	0	0	0	0	0	0	0	1	0	0
Sapindales:Sapindaceae:Hippocastanoideae	Acer	sect. Platanoidea	Acer campestre L.	Browicz, 1982 (1), Candullo et al. 2017	Acer sp.	0	0	0	0	1	1	0	1	1	1	0	0	0	0	0	0	0	1	1	0	1	0	0	1	0	0
Sapindales:Sapindaceae:Hippocastanoideae	Acer	sect. Platanoidea	Acer cappadocicum Gled. + ssp. Divergens (C.Koch ex Pax) E. Murr. + ssp. Sinicum (Rehder) Handel-Manzzetti	Browicz, 1982 (1)	Acer sp.	0	0	0	0	1	1	0	1	1	1	0	0	0	0	0	0	0	1	1	0	1	0	0	1	0	0
Sapindales:Sapindaceae:Hippocastanoideae	Acer	sect. Platanoidea	Acer miyabei Maxim.	GBIF, FOJ, Van Geldern et al. 1994	Acer sp.	0	0	0	0	1	1	0	0	1	0	0	0	0	0	0	0	0	0	0	0	0	0	0	0	0	0
Sapindales:Sapindaceae:Hippocastanoideae	Acer	sect. Platanoidea	Acer pictum Thunb. In Murray (A. mono Maxim.)+ ssp. Macropterum (W.P.Fang) + ssp. Tricuspis (Rehder) Ohashi + ssp. Pubigerum (W.P.Fang) Y.S.Chen + ssp. Pictum ( + spp. Mono (Maxim.) Ohashi	Fang et al. 2011, FOC, GBIF	Acer sp.	0	0	0	0	1	1	0	0	1	0	0	1	1	1	1	1	0	0	0	0	0	0	0	1	0	0
Sapindales:Sapindaceae:Hippocastanoideae	Acer	sect. Platanoidea	Acer platanoides L.	Browicz, 1982 (1), GBIF	Acer sp.	0	0	0	0	1	1	0	0	1	1	0	0	0	0	0	0	0	1	1	0	0	0	0	1	0	0
Sapindales:Sapindaceae:Hippocastanoideae	Acer	sect. Platanoidea	Acer truncatum Bunge	Fang et al. 2011, FOC	Acer sp.	0	0	0	0	1	0	0	0	0	0	0	1	1	1	1	1	0	0	0	0	0	0	0	1	0	0
Sapindales:Sapindaceae:Hippocastanoideae	Acer	sect. Platanoidea	Acer longipes Franch. ex Rehder (=A. nayongense Fang)	Fang et al. 2011, FOC	Acer sp.	0	0	0	0	1	1	0	0	0	0	0	1	1	0	0	0	0	0	0	0	0	0	0	1	0	0
Sapindales:Sapindaceae:Hippocastanoideae	Acer	sect. Platanoidea	Acer tenellum Pax	Fang et al. 2011, FOC	Acer sp.	0	0	0	0	1	1	0	0	0	0	0	1	0	0	0	0	0	0	0	0	0	0	0	0	0	0
Sapindales:Sapindaceae:Hippocastanoideae	Acer	sect. Platanoidea	Acer tibetense W.P.Fang	Fang et al. 2011, FOC	Acer sp.	0	0	0	0	0	0	0	0	0	0	0	1	1	0	1	1	1	0	0	0	0	0	0	0	0	0
Sapindales:Sapindaceae:Hippocastanoideae	Acer	sect. Rubra	Acer pycnathum Koch	GBIF, FOJ	Acer sp.	0	0	0	0	1	0	0	0	0	0	0	0	0	0	0	0	0	0	0	0	0	0	0	0	0	0
Sapindales:Sapindaceae:Hippocastanoideae	Acer	sect. Rubra	Acer rubrum L.	Thompson et al. 1999 (B)	Acer sp.	1	1	0	1	1	1	0	1	1	1	0	0	0	0	1	0	0	0	0	0	0	0	0	0	0	0
Sapindales:Sapindaceae:Hippocastanoideae	Acer	sect. Rubra	Acer saccharinum L.	Thompson et al. 1999 (B)	Acer sp.	0	0	0	0	1	1	0	1	1	0	0	0	0	0	0	0	0	0	0	0	0	0	0	0	0	0
Sapindales:Sapindaceae:Hippocastanoideae	Acer	sect. Spicata	Acer ukurunduense Trautv. & C.A.Mey.	Fang et al. 2011, FOC	Acer sp.	0	0	0	0	0	0	0	0	0	0	0	0	0	1	1	1	0	0	0	0	0	0	0	0	0	0
Sapindales: Sapindaceae	Koelreuteria		Koelreuteria bipinnata Franch.	Fang et al. 2011, FOC, GBIF		0	0	0	0	1	1	0	0	0	0	0	1	1	0	0	0	0	0	0	0	0	0	0	0	0	0
Sapindales: Sapindaceae	Koelreuteria		Koelreuteria elegans (Seem.) A.C.Sm.	Fang et al. 2011, FOC, GBIF		0	0	0	1	1	1	0	0	0	0	0	1	1	0	0	0	0	0	0	0	0	0	0	0	0	0
Sapindales: Sapindaceae	Koelreuteria		Koelreuteria paniculata Laxmann	Fang et al. 2011, FOC, GBIF		0	0	0	0	1	1	0	0	0	0	0	1	1	1	1	0	0	0	0	0	0	0	0	0	0	0
Sapindales: Sapindaceae	Sapindus		Sapindus emarginatus Vahl	FOP, GBIF		0	1	0	1	1	1	0	0	0	0	0	1	1	0	0	0	0	0	0	0	0	0	0	0	0	0
Sapindales: Sapindaceae	Sapindus		Sapindus delavayi (Franch.) Radlkofer	Fang et al. 2011, FOC, GBIF		0	0	0	0	0	0	0	0	0	0	0	1	1	0	0	0	0	0	0	0	0	0	0	0	0	0
Sapindales: Sapindaceae	Sapindus		Sapindus mukorossi Gaertn.	FOP, GBIF		0	0	0	0	0	0	0	0	0	0	0	0	0	0	0	0	0	0	0	0	0	0	0	0	0	0
Sapindales: Sapindaceae	Sapindus		Sapindus oahuense Hillebr. Ex Radlk.	GBIF		1	1	0	1	0	0	0	0	0	0	0	0	0	0	0	0	0	0	0	0	0	0	0	0	0	0
Sapindales: Sapindaceae	Sapindus		Sapindus rarak Candolle	Fang et al. 2011, FOC, GBIF		1	1	0	1	0	0	0	0	0	0	0	1	1	0	0	0	0	0	0	0	0	0	0	0	0	0
Sapindales: Sapindaceae	Sapindus		Sapindus saponaria L.	PDB, GBIF		1	1	0	1	1	0	0	0	0	0	0	1	1	0	0	0	0	0	0	0	0	0	1	1	1	0
Sapindales: Sapindaceae	Sapindus		Sapindus tomentosus Kurz	Fang et al. 2011, FOC, GBIF		0	0	0	0	0	0	0	0	0	0	0	1	1	0	0	0	0	0	0	0	0	0	0	0	0	0
Sapindales: Sapindaceae	Sapindus		Sapindus trifoliatus L.	FOP, GBIF		1	1	0	1	1	0	0	0	0	0	0	1	1	0	0	0	0	0	0	0	0	0	0	0	0	0
Sapindales: Simaroubaceae	Ailanthus		Ailanthus altissima (Mill.) Swingle	Fang et al. 2011, FOC, GBIF		0	0	0	1	1	1	0	0	1	0	0	1	1	1	0	0	0	0	0	0	0	0	0	1	0	0
Sapindales: Simaroubaceae	Ailanthus		Ailanthus excelsa Roxb.	Corbett & Manchester 2004, GBIF, FOP, E-Flora India		0	1	0	1	0	0	0	0	0	0	0	1	0	0	0	0	0	0	0	0	0	0	1	1	0	0	too few geo-referenced points
Sapindales: Simaroubaceae	Ailanthus		Ailanthus fordii Nooteboom	Fang et al. 2011, FOC, GBIF		0	0	0	0	0	0	0	0	0	0	0	1	0	0	0	0	0	0	0	0	0	0	0	0	0	0
Sapindales: Simaroubaceae	Ailanthus		Ailanthus giraldi Dode	Fang et al. 2011, FOC, GBIF		0	0	0	0	0	0	0	0	0	0	0	1	1	0	0	0	0	0	0	0	0	0	0	0	0	0
Sapindales: Simaroubaceae	Ailanthus		Ailanthus guangxiensis X.l:Mo ex C.F.Liang & L.Mo	Fang et al. 2011, FOC, GBIF		0	0	0	0	0	0	0	0	0	0	0	1	0	0	0	0	0	0	0	0	0	0	0	0	0	0
Sapindales: Simaroubaceae	Ailanthus		Ailanthus integrifolia Lam.	GBIF		1	1	0	1	0	0	0	0	0	0	0	0	0	0	0	0	0	0	0	0	0	0	0	0	0	0
Sapindales: Simaroubaceae	Ailanthus		Ailanthus triphysa (Dennstedt) Alston	Fang et al. 2011, FOC, GBIF, Corbett & Manchester 2004		1	1	0	1	1	0	0	0	0	0	0	1	0	0	0	0	0	0	0	0	0	0	0	0	0	0
Sapindales: Simaroubaceae	Ailanthus		Ailanthus vilmoriniana Dode	Fang et al. 2011, FOC, GBIF		0	0	0	1	1	1	0	0	0	0	0	1	1	0	0	0	0	0	0	0	0	0	0	0	0	0
Sapindales: Simaroubaceae	Picrasma	EAsia	Picrasma chinensis P.Z.Chen	Fang et al. 2011, FOC, GBIF	Picrasma sp.	0	0	0	0	0	0	0	0	0	0	0	1	1	0	0	0	0	0	0	0	0	0	0	0	0	0
Sapindales: Simaroubaceae	Picrasma	EAsia	Picrasma quassioides (D.Don) Bennett	Fang et al. 2011, FOC, GBIF	Picrasma sp.	0	1	0	1	1	1	0	0	0	0	0	1	1	1	1	0	0	0	0	0	0	0	0	0	0	0
Sapindales: Simaroubaceae	Picrasma	SA	Picrasma crenata (Vell.) Engl.	GBIF	Picrasma sp.	0	0	1	1	1	1	0	0	0	0	0	1	1	0	0	0	0	0	0	0	0	0	0	0	0	0
Sapindales: Simaroubaceae	Picrasma	SA	Picrasma excelsa (SW.) Planch.	GBIF	Picrasma sp.	1	1	0	1	0	1	0	0	0	0	0	0	0	0	0	0	0	0	0	0	0	0	0	0	0	0
Sapindales: Simaroubaceae	Picrasma	EAsia, POLY	Picrasma javanica Bl.	GBIF	Picrasma sp.	1	1	0	1	0	0	0	0	0	0	0	1	0	0	0	0	0	0	0	0	0	0	0	0	0	0
Sapindales: Simaroubaceae	Picrasma	MA	Picrasma mexicana T.S.Brandegee	GBIF	Picrasma sp.	0	1	0	1	0	0	0	0	0	0	0	1	1	0	0	0	0	0	0	0	0	0	0	0	0	0
Sapindales: Simaroubaceae	Picrasma	CARIB	Picrasma tetramera (Urb.) W.W.Thomas, J.D.Mitch. & A.Noa	GBIF	Picrasma sp.	0	0	0	1	0	0	0	0	0	0	0	0	0	0	0	0	0	0	0	0	0	0	0	0	0	0	too few geo-referenced points
Sapindales: Nitrariaceae	Nitraria	CA	Nitraria pamirica L.	Fang et al. 2011, FOC	Nitraria sp.	0	0	0	0	0	0	0	1	1	0	0	0	0	0	0	1	1	0	0	0	0	0	0	1	0	1
Sapindales: Nitrariaceae	Nitraria	CA	Nitraria robotowskii Kom.	Fang et al. 2011, FOC	Nitraria sp.	0	0	0	0	0	0	0	0	0	0	0	0	0	0	0	0	0	0	0	0	0	0	0	1	0	1
Sapindales: Nitrariaceae	Nitraria	CA	Nitraria sibirica Pall.	Fang et al. 2011, FOC, GBIF	Nitraria sp.	0	0	0	0	0	0	0	0	1	1	0	1	0	0	1	1	1	0	0	0	0	0	0	1	0	1
Sapindales: Nitrariaceae	Nitraria	CA	Nitraria sphaerocarpa Maxim.	Fang et al. 2011, FOC, GBIF	Nitraria sp.	0	0	0	0	0	0	0	0	1	1	0	0	0	0	0	1	1	0	0	0	0	0	0	1	0	1
Sapindales: Nitrariaceae	Nitraria	CA	Nitraria tangutorum Bobrov	Fang et al. 2011, FOC, GBIF	Nitraria sp.	0	0	0	0	0	0	0	0	1	1	0	0	0	0	1	1	1	0	0	0	0	0	0	1	0	1
Sapindales: Nitrariaceae	Nitraria	Med	Nitraria retusa (Firssk.) Asch.	FOI, FOP, GBIF	Nitraria sp.	0	0	0	0	0	0	0	0	0	0	0	0	0	0	0	0	0	0	0	0	0	0	1	0	1	0
Sapindales: Nitrariaceae	Nitraria	Med, Asia	Nitraria schoberi L.	FOI, FOP, GBIF	Nitraria sp.	0	0	0	0	0	0	0	0	1	1	0	0	0	0	0	0	0	1	0	1	1	0	1	1	1	1
Sapindales: Anacardiaceae				GBIF		1	1	1	1	1	1	1	1	1	0	0	1	1	1	1	1	0	1	1	0	1	0	1	1	1	1
Malvales: Malvaceae/Malvoideae				GBIF	Malvoideae gen. indet.	1	1	1	1	1	1	1	1	1	1	1	1	1	1	1	1	1	1	1	1	1	1	1	1	1	1
Malvales: Malvaceae: Tilioideae	Tilia		Tilia americana L. (=T. Heterophylla)	Thompson et al. 1999 (B), McCarthy & Mason-Gamer 2016, E-Flora, GBIF, CVPM	Tilia sp.	0	0	1	1	1	1	0	1	1	0	0	1	1	0	0	0	0	0	0	0	0	0	0	1	1	0
Malvales: Malvaceae: Tilioideae	Tilia	sect. Amurensis	Tilia amurensis Rupr. (var. taquetii, var. amurensis, var. araneosa)	Pigott 2012, FOC, Fang et al. 2011, GBIF	Tilia sp.	0	0	0	0	1	0	0	0	1	1	0	1	0	1	1	1	0	0	0	0	0	0	0	0	0	0
Malvales: Malvaceae: Tilioideae	Tilia	sect. Amurensis	Tilia japonica (Miq.) Simonk.	Pigott 2012, FOC, Fang et al. 2011, GBIF	Tilia sp.	0	0	0	0	1	1	0	0	1	1	0	1	0	0	0	0	0	0	0	0	0	0	0	0	0	0
Malvales: Malvaceae: Tilioideae	Tilia	sect. Amurensis	Tilia kiusiana Makino & Shiras. Ex Shiras.	Pigott 2012, FOJ, GBIF	Tilia sp.	0	0	0	0	1	1	0	0	0	0	0	0	0	0	0	0	0	0	0	0	0	0	0	0	0	0
Malvales: Malvaceae: Tilioideae	Tilia	sect. Amurensis	Tilia mongolica Maxim.	Pigott 2012, FOC, Fang et al. 2011, GBIF	Tilia sp.	0	0	0	0	1	1	0	0	0	0	0	1	1	1	1	0	0	0	0	0	0	0	0	1	0	0
Malvales: Malvaceae: Tilioideae	Tilia	sect. Amurensis	Tilia paucicostata Maxim. (var. Dictzoneura, var. Paucicostata, var. Yunannensis)	Pigott 2012, FOC, Fang et al. 2011, GBIF	Tilia sp.	0	0	0	0	1	1	0	0	0	0	0	1	1	1	1	0	0	0	0	0	0	0	0	1	0	0
Malvales: Malvaceae: Tilioideae	Tilia	sect. Amurensis	Tilia tomentosa Moench	Pigott 2012, Browicz 1982, GBIF	Tilia sp.	0	0	0	0	1	1	0	0	1	1	0	0	0	0	0	0	0	1	1	0	0	0	0	0	0	0
Malvales: Malvaceae: Tilioideae	Tilia	sect. Anastrea	Tilia cordata Mill.	Pigott 2012, DVFn, GBIF, Ö Flora	Tilia sp.	0	0	0	0	1	1	1	1	1	1	0	0	0	0	0	0	0	1	1	0	0	0	0	0	0	0
Malvales: Malvaceae: Tilioideae	Tilia	sect. Anastrea	Tilia dasystyla Steven (var. dasystylia, var. caucasia)	Pigott 2012, Browicz 1982, GBIF	Tilia sp.	0	0	0	0	1	1	0	1	1	1	0	0	0	0	0	0	0	1	1	0	0	0	0	0	0	0
Malvales: Malvaceae: Tilioideae	Tilia	sect. Anastrea	Tilia platyphyllos Scop.	Pigott 2012, DVFn, GBIF, Ö Flora	Tilia sp.	0	0	0	0	1	1	1	0	1	1	0	0	0	0	0	0	0	1	1	0	0	0	0	0	0	0
Malvales: Malvaceae: Tilioideae	Tilia	sect. Astrophilyrea	Tilia callidonta H.T.Chang	Pigott 2012, FOC, Fang et al. 2011, GBIF	Tilia sp.	0	0	0	0	0	0	0	0	0	0	0	1	1	0	1	0	0	0	0	0	0	0	0	0	0	0
Malvales: Malvaceae: Tilioideae	Tilia	sect. Astrophilyrea	Tilia chinagiana Hu & W.C.Cheng	Pigott 2012, FOC, Fang et al. 2011, GBIF	Tilia sp.	0	0	0	0	1	1	0	0	0	0	0	0	0	0	0	0	0	0	0	0	0	0	0	0	0	0
Malvales: Malvaceae: Tilioideae	Tilia	sect. Astrophilyrea	Tilia chinensis Maxim. (var. Chinensis, var. Investita, var. Intonsa)	Pigott 2012, FOC, Fang et al. 2011, GBIF	Tilia sp.	0	0	0	0	1	1	0	0	0	0	0	1	1	0	1	1	1	0	0	0	0	0	0	0	0	0
Malvales: Malvaceae: Tilioideae	Tilia	sect. Astrophilyrea	Tilia concinna Pigott	Pigott 2012	Tilia sp.	0	0	0	0	0	0	0	0	0	0	0	1	0	0	0	0	0	0	0	0	0	0	0	0	0	0
Malvales: Malvaceae: Tilioideae	Tilia	sect. Astrophilyrea	Tilia mandshurica Rupr. & Maxim. (var. Megaphylla, var. Tuberculata, var. Mandshurica, var, ovalis)	Pigott 2012, FOC, Fang et al. 2011, GBIF	Tilia sp.	0	0	0	0	1	0	0	1	1	0	0	1	0	1	1	1	0	0	0	0	0	0	0	1	0	0
Malvales: Malvaceae: Tilioideae	Tilia	sect. Astrophilyrea	Tilia maximowicziana Shiras.	Pigott 2012, GBIF	Tilia sp.	0	0	0	0	1	1	0	0	1	0	0	0	0	0	0	0	0	0	0	0	0	0	0	0	0	0
Malvales: Malvaceae: Tilioideae	Tilia	sect. Astrophilyrea	Tilia miqueliana Maxim.	Pigott 2012, FOC, Fang et al. 2011, GBIF	Tilia sp.	0	0	0	0	1	1	0	0	0	0	0	1	1	1	1	0	0	0	0	0	0	0	0	1	0	0
Malvales: Malvaceae: Tilioideae	Tilia	sect. Astrophilyrea	Tilia nobilis Rehder & E.H.Wilson	Pigott 2012, FOC, Fang et al. 2011, GBIF	Tilia sp.	0	0	0	0	1	0	0	0	0	0	0	1	1	0	0	0	0	0	0	0	0	0	0	0	0	0
Malvales: Malvaceae: Tilioideae	Tilia	sect. Astrophilyrea	Tilia oliveri Szyszyl. (var. Cinerascens, var. Oliveri)	FOC, Fang et al. 2011, GBIF	Tilia sp.	0	0	0	0	1	1	0	0	0	0	0	1	1	1	1	0	0	0	0	0	0	0	0	1	0	0
Malvales: Malvaceae: Tilioideae	Tilia	sect. Astrophilyrea	Tilia tuan Szyszyl. (var. tuan, var. chinensis, var. Chenmoui, T. likiangensis H.T.Chang)	FOC, Fang et al. 2011, GBIF	Tilia sp.	0	0	0	0	1	1	0	0	0	0	0	1	1	0	0	0	0	0	0	0	0	0	0	0	0	0
Malvales: Malvaceae: Tilioideae	Tilia	sect. Henryana	Tilia henryana Szyszyl. (var. Hentyana, var. Subglabra)	Pigott 2012, FOC, Fang et al. 2011, GBIF	Tilia sp.	0	0	0	0	1	1	0	0	0	0	0	1	1	1	1	0	0	0	0	0	0	0	0	1	0	0
Malvales: Malvaceae: Tilioideae	Tilia		Tilia endochrysea Hand.-Mazz.	Pigott 2012, FOC, Fang et al. 2011, GBIF	Tilia sp.	0	0	0	0	1	1	0	0	0	0	0	1	1	0	0	0	0	0	0	0	0	0	0	0	0	0
Malvales: Malvaceae: Tilioideae	Tilia		Tilia jiaodongensis S.B.Liang	FOC, Fang et al. 2011, GBIF	Tilia sp.	0	0	0	0	0	0	0	0	0	0	0	1	0	0	0	0	0	0	0	0	0	0	0	0	0	0
Malvales: Malvaceae: Tilioideae	Tilia		Tilia kueichouensis Hu	FOC, Fang et al. 2011, GBIF	Tilia sp.	0	0	0	0	1	1	0	0	0	0	0	1	1	0	0	0	0	0	0	0	0	0	0	0	0	0
Malvales: Malvaceae: Tilioideae	Tilia		Tilia membranacea H.T.Chang	FOC, Fang et al. 2011, GBIF	Tilia sp.	0	0	0	0	1	0	0	0	0	0	0	0	0	0	0	0	0	0	0	0	0	0	0	0	0	0
Malvales: Malvaceae: Tilioideae	Tilia		Tilia taishanensis S.B.Liang	FOC, Fang et al. 2011, GBIF	Tilia sp.	0	0	0	0	1	0	0	0	0	0	0	1	0	1	0	0	0	0	0	0	0	0	0	0	0	0
Caryophyllales: Plumbaginaceae				GBIF		1	1	1	1	1	1	1	1	1	1	1	1	1	1	1	1	1	1	1	1	1	1	1	1	1	1
Caryophyllales: Polygonaceae	Rumex			GBIF		1	1	1	1	1	1	1	1	1	1	1	1	1	1	1	1	1	1	1	1	1	1	1	1	1	1
Caryophyllales: Polygonaceae	Polygonum			GBIF		1	1	1	1	1	1	1	1	1	1	1	1	1	1	1	1	1	1	1	1	1	1	1	1	1	1
Caryophyllales: Polygonaceae	Persicaria			GBIF		1	1	1	1	1	1	1	1	1	1	1	1	1	1	1	1	1	1	1	1	1	1	1	1	1	1
Caryophyllales: Caryophyllaceae				GBIF		1	1	1	1	1	1	1	1	1	1	1	1	1	1	1	1	1	1	1	1	1	1	1	1	1	1
Caryophyllales: Amaranthaceae				GBIF		1	1	1	1	1	1	1	1	1	1	1	1	1	1	1	1	1	1	1	1	1	1	1	1	1	1
Caryophyllales: Droseraceae	Drosera			GBIF	Drosera sp.	1	1	1	1	1	1	1	1	1	1	0	1	1	1	1	0	0	0	1	0	0	0	0	0	0	0
Cornales: Nyssaceae	Nyssa		Nyssa aquatica L.	Thompson et al. 1999 (B),FNA, GBIF, PDB		0	0	0	0	1	0	0	0	0	0	0	0	0	0	0	0	0	0	0	0	0	0	0	0	0	0
Cornales: Nyssaceae	Nyssa		Nyssa ogeche W. Bartram ex Marshall	Thompson et al. 1999 (B),FNA, GBIF, PDB		0	0	0	0	1	0	0	0	0	0	0	0	0	0	0	0	0	0	0	0	0	0	0	0	0	0
Cornales: Nyssaceae	Nyssa		Nyssa sylvatica Marshall , N. s. biflora, N.s. ursina	Thompson et al. 1999 (B),FNA, GBIF, PDB		0	0	0	1	1	0	0	0	0	0	0	0	0	0	0	0	0	0	0	0	0	0	0	0	0	0
Cornales: Nyssaceae	Nyssa		Nyssa javanica (Blume) Wangerin	FOC, Fang et al. 2011, GBIF		1	0	1	1	1	1	0	0	0	0	0	1	1	0	0	0	0	0	0	0	0	0	0	0	0	0
Cornales: Nyssaceae	Nyssa		Nyssa sinesnsis Oliver (=N. shangzeensis W.P.Fang & Soong, N. wenshanesnis W.P.Fang & Soong, N. shweliensis (W.W.Smith) Airy-Shaw	FOC, Fang et al. 2011, GBIF		0	0	0	1	1	1	0	0	0	0	0	1	1	0	0	0	0	0	0	0	0	0	0	0	0	0
Cornales: Nyssaceae	Nyssa		Nyssa yunnanensis W.Q.Yin ex H.N. Qin & Phengklai	FOC, Fang et al. 2011, GBIF		0	0	0	0	0	0	0	0	0	0	0	1	1	0	0	0	0	0	0	0	0	0	0	0	0	0
Ericales: Sapotaceae/ Chrysophylleae	Xantolis	Clade3?		GBIF, Swenson & Anderberg 2005, Harley 1991	Sapotaceae gen. indet.	1	1	0	1	0	0	0	0	0	0	0	1	0	0	0	0	0	0	0	0	0	0	0	0	0	0
Ericales: Sapotaceae/ Isorandreae	Burckella	Clade2		GBIF, Swenson & Anderberg 2005, Harley 1991	Sapotaceae gen. indet.	1	0	0	0	0	0	0	0	0	0	0	0	0	0	0	0	0	0	0	0	0	0	0	0	0	0
Ericales: Sapotaceae/ Isorandreae	Madhuca	Clade2		GBIF, Swenson & Anderberg 2005, Harley 1991	Sapotaceae gen. indet.	0	0	0	0	0	0	0	0	0	0	0	0	0	0	0	0	0	0	0	0	0	0	0	0	0	0
Ericales: Sapotaceae/ Isorandreae	Palaquium	Clade2		GBIF, Swenson & Anderberg 2005, Harley 1991	Sapotaceae gen. indet.	0	0	0	0	0	0	0	0	0	0	0	0	0	0	0	0	0	0	0	0	0	0	0	0	0	0
Ericales: Sapotaceae/ Isorandreae	Payena	Clade2		GBIF, Swenson & Anderberg 2005, Harley 1991	Sapotaceae gen. indet.	1	1	0	1	0	0	0	0	0	0	0	0	0	0	0	0	0	0	0	0	0	0	0	0	0	0
Ericales: Sapotaceae/ Mimusopeae	Manilkara	Clade2		GBIF, Swenson & Anderberg 2005, Harley 1991	Sapotaceae gen. indet.	1	1	1	1	1	1	0	0	0	0	0	1	1	0	0	0	0	0	0	0	0	0	1	1	0	0
Ericales: Sapotaceae/ Mimusopeae	Mimusops	Clade2		GBIF, Swenson & Anderberg 2005, Harley 1991	Sapotaceae gen. indet.	1	1	1	1	1	1	0	0	0	0	0	1	1	0	0	0	0	0	0	0	0	0	1	1	0	0
Ericales: Sapotaceae/ Mimusopeae	Neolemonniera	Clade2		GBIF, Swenson & Anderberg 2005, Harley 1991	Sapotaceae gen. indet.	0	1	0	1	0	0	0	0	0	0	0	0	0	0	0	0	0	0	0	0	0	0	0	0	0	0
Ericales: Sapotaceae/ Mimusopeae	Northia	Clade2		GBIF, Swenson & Anderberg 2005, Harley 1991	Sapotaceae gen. indet.	1	0	0	0	0	0	0	0	0	0	0	0	0	0	0	0	0	0	0	0	0	0	0	0	0	0
Ericales: Sapotaceae/ Sideroxyleae	Sideroxylon	Clade2		GBIF, Swenson & Anderberg 2005, Harley 1991	Sapotaceae gen. indet.	1	1	1	1	1	1	0	0	0	0	0	1	1	0	0	0	0	0	1	0	0	0	1	1	1	0
Ericales: Ericaceae					Ericaceae gen. indet.	1	1	1	1	1	1	1	1	1	1	1	1	1	1	1	1	1	1	1	1	1	1	1	1	1	1
Ericales: Ericaceae	Erica			GBIF	Erica sp.	1	1	0	1	1	1	0	0	1	1	0	1	1	0	0	0	1	1	1	0	0	0	1	1	1	0
Garryales: Eucommiaceae	Eucommia		Eucommia ulmoides Oliv.	FOC, Fang et al. 2011, GBIF		0	0	0	0	1	1	0	0	0	0	0	1	1	0	0	0	0	0	0	0	0	0	0	0	0	0
Lamiales:Oleaceae			Oleaceae	GBIF		1	1	1	1	1	1	1	1	1	1	1	1	1	1	1	1	0	1	1	1	1	0	1	1	1	1
Lamiales:Oleaceae:Fontanesieae	Fontanesia		Fontanesia fortunei Carrière	Fang et al. 2011, FOC, GBIF	O.g.i. type 3	0	0	0	0	1	0	0	0	0	0	0	1	1	1	1	0	0	0	0	0	0	0	0	1	0	0
Lamiales:Oleaceae:Fontanesieae	Fontanesia		Fontanesia phyllyraeoides Labill.	Browicz 1984 (3), GBIF	O.g.i. type 3	0	0	0	0	0	1	0	0	0	0	0	0	0	0	0	0	0	1	1	0	0	0	0	0	0	0
Lamiales:Oleaceae:Oleeae:Ligustrinae	Ligustrum		Ligustrum amamianum Koidz.	Fang et al. 2011,FOC	O.g.i. type 6	0	0	0	0	1	0	0	0	0	0	0	1	0	0	0	0	0	0	0	0	0	0	0	0	0	0
Lamiales:Oleaceae:Oleeae:Ligustrinae	Ligustrum		Ligustrum angustum B.M.Mao	Fang et al. 2011,FOC	O.g.i. type 6	0	0	0	0	1	1	0	0	0	0	0	1	1	0	0	0	0	0	0	0	0	0	0	0	0	0
Lamiales:Oleaceae:Oleeae:Ligustrinae	Ligustrum		Ligustrum compactum (Wall. ex G.Don) Hook. & Thomson ex Brandis + L. compactum var. Velutinum P.S.Green*	Fang et al. 2011,FOC	O.g.i. type 6	0	0	0	0	1	1	0	0	0	0	0	1	1	0	1	1	0	0	0	0	0	0	1	0	0	0
Lamiales:Oleaceae:Oleeae:Ligustrinae	Ligustrum		Ligustrum confusum Decne.	Fang et al. 2011,FOC	O.g.i. type 6	0	0	0	0	1	1	0	0	0	0	0	1	1	0	0	1	0	0	0	0	0	0	1	0	0	0
Lamiales:Oleaceae:Oleeae:Ligustrinae	Ligustrum		Ligustrum delavayanum Har.	Fang et al. 2011,FOC	O.g.i. type 6	0	0	0	0	1	1	0	0	0	0	0	1	1	0	0	0	0	0	0	0	0	0	1	0	0	0
Lamiales:Oleaceae:Oleeae:Ligustrinae	Ligustrum		Ligustrum expansum Rehder	Fang et al. 2011,FOC	O.g.i. type 6	0	0	0	0	1	1	0	0	0	0	0	1	1	0	0	0	0	0	0	0	0	0	0	0	0	0
Lamiales:Oleaceae:Oleeae:Ligustrinae	Ligustrum		Ligustrum gracile Rehder	Fang et al. 2011,FOC	O.g.i. type 6	0	0	0	0	1	1	0	0	0	0	0	1	1	0	1	1	0	0	0	0	0	0	1	0	0	0
Lamiales:Oleaceae:Oleeae:Ligustrinae	Ligustrum		Ligustrum henryi Hemsl.	Fang et al. 2011,FOC	O.g.i. type 6	0	0	0	0	1	1	0	0	0	0	0	1	1	0	0	0	0	0	0	0	0	0	0	0	0	0
Lamiales:Oleaceae:Oleeae:Ligustrinae	Ligustrum		Ligustrum leucanthum (S.Moore) P.S.Green	Fang et al. 2011,FOC	O.g.i. type 6	0	0	0	0	1	1	0	0	0	0	0	1	1	0	0	0	0	0	0	0	0	0	0	0	0	0
Lamiales:Oleaceae:Oleeae:Ligustrinae	Ligustrum		Ligustrum lianum P.S.Hsu	Fang et al. 2011,FOC	O.g.i. type 6	0	0	0	1	1	1	0	0	0	0	0	1	1	0	0	0	0	0	0	0	0	0	0	0	0	0
Lamiales:Oleaceae:Oleeae:Ligustrinae	Ligustrum		Ligustrum longitubum (P.S.Hsu) P.S.Hsu	Fang et al. 2011,FOC	O.g.i. type 6	0	0	0	0	1	0	0	0	0	0	0	0	0	0	0	0	0	0	0	0	0	0	0	0	0	0
Lamiales:Oleaceae:Oleeae:Ligustrinae	Ligustrum		Ligustrum lucidum W.T.Aiton	Fang et al. 2011,FOC	O.g.i. type 6	0	0	0	0	1	1	0	0	0	0	0	1	1	1	1	1	0	0	0	0	0	0	1	1	0	0
Lamiales:Oleaceae:Oleeae:Ligustrinae	Ligustrum		Ligustrum morrisonense Kaneh. & Sasaki	Fang et al. 2011,FOC	O.g.i. type 6	0	1	0	1	0	0	0	0	0	0	0	1	1	0	0	0	0	0	0	0	0	0	0	0	0	0
Lamiales:Oleaceae:Oleeae:Ligustrinae	Ligustrum		Ligustrum obovatilimbum B.M.Miao	Fang et al. 2011,FOC	O.g.i. type 6	0	0	0	0	0	0	0	0	0	0	0	1	0	0	0	0	0	0	0	0	0	0	0	0	0	0
Lamiales:Oleaceae:Oleeae:Ligustrinae	Ligustrum		Ligustrum obtusifolium Siebild & Zucc.* + ssp. Mucrophyllum (Nakai) P.S.Green + ssp. Suave (Kitagawa) Kitagawa	Fang et al. 2011,FOC	O.g.i. type 6	0	0	0	0	1	0	0	0	0	0	0	1	1	1	1	0	0	0	0	0	0	0	0	0	0	0
Lamiales:Oleaceae:Oleeae:Ligustrinae	Ligustrum		Ligustrum pendiculare Rehder	Fang et al. 2011,FOC	O.g.i. type 6	0	0	0	0	1	1	0	0	0	0	0	1	1	0	0	0	0	0	0	0	0	0	0	0	0	0
Lamiales:Oleaceae:Oleeae:Ligustrinae	Ligustrum		Ligustrum pricei Hayata	Fang et al. 2011,FOC	O.g.i. type 6	0	0	0	1	1	1	0	0	0	0	0	1	1	0	0	0	0	0	0	0	0	0	0	0	0	0
Lamiales:Oleaceae:Oleeae:Ligustrinae	Ligustrum		Ligustrum punctifolium M.C.Chang	Fang et al. 2011,FOC	O.g.i. type 6	0	0	0	1	0	0	0	0	0	0	0	1	0	0	0	0	0	0	0	0	0	0	0	0	0	0
Lamiales:Oleaceae:Oleeae:Ligustrinae	Ligustrum		Ligustrum quihoui Carrière	Fang et al. 2011,FOC	O.g.i. type 6	0	0	0	0	1	1	0	0	0	0	0	1	1	0	1	1	0	0	0	0	0	0	1	1	0	0
Lamiales:Oleaceae:Oleeae:Ligustrinae	Ligustrum		Ligustrum retusum Merr.	Fang et al. 2011,FOC	O.g.i. type 6	0	0	0	1	1	1	0	0	0	0	0	1	0	0	0	0	0	0	0	0	0	0	0	0	0	0
Lamiales:Oleaceae:Oleeae:Ligustrinae	Ligustrum		Ligustrum robustum ssp. chinense P.S.Green	Fang et al. 2011,FOC	O.g.i. type 6	0	0	0	0	1	1	0	0	0	0	0	1	1	0	0	0	0	0	0	0	0	0	0	0	0	0
Lamiales:Oleaceae:Oleeae:Ligustrinae	Ligustrum		Ligustrum sempervirens (Franch.) Lingelsh.	Fang et al. 2011,FOC	O.g.i. type 6	0	0	0	0	1	1	0	0	0	0	0	1	1	0	0	1	0	0	0	0	0	0	1	0	0	0
Lamiales:Oleaceae:Oleeae:Ligustrinae	Ligustrum		Ligustrum sinense Lour.	Fang et al. 2011,FOC	O.g.i. type 6	0	1	0	1	1	1	1	0	0	0	0	1	1	0	1	1	0	0	0	0	0	0	0	0	0	0
Lamiales:Oleaceae:Oleeae:Ligustrinae	Ligustrum		Ligustrum strongylophyllum Hemsl.	Fang et al. 2011,FOC	O.g.i. type 6	0	0	0	0	1	1	0	0	0	0	0	1	1	0	0	0	0	0	0	0	0	0	0	0	0	0
Lamiales:Oleaceae:Oleeae:Ligustrinae	Ligustrum		Ligustrum tenuipes M.C.Chang	Fang et al. 2011,FOC	O.g.i. type 6	0	0	0	0	1	0	0	0	0	0	0	0	0	0	0	0	0	0	0	0	0	0	0	0	0	0
Lamiales:Oleaceae:Oleeae:Ligustrinae	Ligustrum		Ligustrum vulgare L.	Browicz 1984 (3)	O.g.i. type 6	0	0	0	0	1	1	0	0	1	1	0	0	0	0	0	0	0	1	1	0	0	0	0	0	0	0
Lamiales:Oleaceae:Oleeae:Ligustrinae	Ligustrum		Ligustrum xingrenense D.J.Liu	Fang et al. 2011,FOC	O.g.i. type 6	0	0	0	0	0	0	0	0	0	0	0	1	1	0	0	0	0	0	0	0	0	0	0	0	0	0
Lamiales:Oleaceae:Oleeae:Ligustrinae	Ligustrum		Ligustrum yunguiense B.M.Miao	Fang et al. 2011,FOC	O.g.i. type 6	0	0	0	0	0	0	0	0	0	0	0	0	1	0	0	0	0	0	0	0	0	0	0	0	0	0
Lamiales:Oleaceae:Oleeae:Ligustrinae	Syringa		Syringa emodi Wall. E. Royle	FOP, GBIF	O.g.i. type 6	0	0	0	0	1	1	0	0	1	1	0	1	1	0	0	0	0	0	0	0	0	0	0	0	0	0
Lamiales:Oleaceae:Oleeae:Ligustrinae	Syringa		Syringa josikaea J.Jacq. Ex Rchb.	GBIF	O.g.i. type 6	0	0	0	0	1	1	0	0	1	0	0	0	0	0	0	0	0	0	0	0	0	0	0	0	0	0
Lamiales:Oleaceae:Oleeae:Ligustrinae	Syringa		Syringa komarowii C.K.Schneid. + ssp. Reflexa (C.K.Schneid.) P.S.Green & M.C.Chang	Fang et al. 2011,FOC	O.g.i. type 6	0	0	0	0	1	1	0	0	0	0	0	1	1	0	1	0	0	0	0	0	0	0	0	0	0	0
Lamiales:Oleaceae:Oleeae:Ligustrinae	Syringa		Syringa mairei (H.Lév.) Rehder	Fang et al. 2011,FOC	O.g.i. type 6	0	0	0	0	0	0	0	0	0	0	0	1	1	0	1	1	1	0	0	0	0	0	0	0	0	0
Lamiales:Oleaceae:Oleeae:Ligustrinae	Syringa		Syringa meyeri C.K. Schneid.	Fang et al. 2011,FOC	O.g.i. type 6	0	0	0	0	0	0	0	0	0	0	0	0	0	1	1	0	0	0	0	0	0	0	0	1	0	0
Lamiales:Oleaceae:Oleeae:Ligustrinae	Syringa		Syringa oblata Lindl. + ssp. Dilatata (Nakai) P.S.Green & Chang	Fang et al. 2011,FOC	O.g.i. type 6	0	0	0	0	1	0	0	0	0	0	0	1	1	1	1	1	0	0	0	0	0	0	0	1	0	1
Lamiales:Oleaceae:Oleeae:Ligustrinae	Syringa		Syringa pinetorum W.W.Sm.	Fang et al. 2011,FOC	O.g.i. type 6	0	0	0	0	0	0	0	0	0	0	0	0	1	0	1	1	1	0	0	0	0	0	0	0	0	0
Lamiales:Oleaceae:Oleeae:Ligustrinae	Syringa		Syringa pinnatifolia Hemsl.	Fang et al. 2011,FOC	O.g.i. type 6	0	0	0	0	0	0	0	0	0	0	0	0	1	1	1	1	1	0	0	0	0	0	0	1	0	1
Lamiales:Oleaceae:Oleeae:Ligustrinae	Syringa		Syringa protolaciniata P.S.Green & M.C.Chang	Fang et al. 2011,FOC	O.g.i. type 6	0	0	0	0	0	0	0	0	0	0	0	0	0	0	1	1	0	0	0	0	0	0	0	1	0	0
Lamiales:Oleaceae:Oleeae:Ligustrinae	Syringa		Syringa pubescens Turcz. + ssp. mucrophylla (Diels) M.C.Chang & X.L.Chen + ssp. Patula (Palib.) M.C.Chang & X.L.Chen	Fang et al. 2011,FOC	O.g.i. type 6	0	0	0	0	0	0	0	0	0	0	0	1	1	1	1	1	1	0	0	0	0	0	0	1	0	0
Lamiales:Oleaceae:Oleeae:Ligustrinae	Syringa		Syringa reticulata (Blume) H.Hara + ssp. pekinensis (Rupr.) P.S.Green & M.C.Chang + ssp. amurensis (Rupr.) P.S.Green & M.C.Chang	GBIF, Fang et al. 2011,FOC	O.g.i. type 6	0	0	0	0	1	1	0	0	0	0	0	1	1	1	1	1	0	0	0	0	0	0	0	1	0	0
Lamiales:Oleaceae:Oleeae:Ligustrinae	Syringa		Syringa sweginzowii Koehne & Lingelsh.	Fang et al. 2011,FOC	O.g.i. type 6	0	0	0	0	0	0	0	0	0	0	0	1	1	0	1	1	1	0	0	0	0	0	0	1	0	0
Lamiales:Oleaceae:Oleeae:Ligustrinae	Syringa		Syringa tinetica P.Y.Bai	Fang et al. 2011,FOC	O.g.i. type 6	0	0	0	0	0	0	0	0	0	0	0	0	0	0	0	0	1	0	0	0	0	0	0	0	0	0
Lamiales:Oleaceae:Oleeae:Ligustrinae	Syringa		Syringa tomentella Bureau & Franch.	Fang et al. 2011,FOC	O.g.i. type 6	0	0	0	0	0	0	0	0	0	0	0	1	1	0	1	1	0	0	0	0	0	0	0	1	0	0
Lamiales:Oleaceae:Oleeae:Ligustrinae	Syringa		Syringa villosa Vahl	Fang et al. 2011,FOC	O.g.i. type 6	0	0	0	0	0	0	0	0	0	0	0	1	1	1	1	0	0	0	0	0	0	0	0	1	0	0
Lamiales:Oleaceae:Oleeae:Ligustrinae	Syringa		Syringa vulgaris L.	GBIF	O.g.i. type 6	0	0	0	0	1	1	0	0	0	0	0	0	0	0	0	0	0	1	1	0	0	0	0	0	0	0
Lamiales:Oleaceae:Oleeae:Ligustrinae	Syringa		Syringa wardii W.W.Smith	Fang et al. 2011,FOC	O.g.i. type 6	0	0	0	0	0	0	0	0	0	0	0	1	1	0	1	1	1	0	0	0	0	0	0	1	0	0
Lamiales:Oleaceae:Oleeae:Ligustrinae	Syringa		Syringa wolfii C.K.Schneid.	Fang et al. 2011,FOC	O.g.i. type 6	0	0	0	0	0	0	0	0	0	0	0	1	1	1	1	0	0	0	0	0	0	0	0	1	0	0
Lamiales:Oleaceae:Oleeae:Ligustrinae	Syringa		Syringa yunnanensis Franch.	Fang et al. 2011,FOC	O.g.i. type 6	0	0	0	0	0	0	0	0	0	0	0	1	1	0	1	1	1	0	0	0	0	0	0	0	0	0
Lamiales:Oleaceae:Oleeae:Fraxininae	Fraxinus	Dipetalae	Fraxinus anomala Torr. ex S.Watson	Thompson et al. 1999 (B)	O.g.i. type 1 aff. Fraxinus	0	0	0	0	0	1	0	0	1	1	0	0	0	0	0	0	0	1	1	0	1	0	0	1	0	1
Lamiales:Oleaceae:Oleeae:Fraxininae	Fraxinus	Dipetalae	Fraxinus dipetala Hook. & Arn.	Thompson et al. 1999 (B)	O.g.i. type 1 aff. Fraxinus	0	0	0	0	0	0	0	0	0	0	0	0	0	0	0	0	0	1	1	0	0	0	0	0	0	0
Lamiales:Oleaceae:Oleeae:Fraxininae	Fraxinus	Dipetalae	Fraxinus quadrangulata Michx.	Thompson et al. 1999 (B)	O.g.i. type 1 aff. Fraxinus	0	0	0	0	1	0	0	1	0	0	0	0	0	0	0	0	0	0	0	0	0	0	0	0	0	0
Lamiales:Oleaceae:Oleeae:Fraxininae	Fraxinus	Melioides	Fraxinus americana L.	Thompson et al. 1999 (B), PDB, GBIF	O.g.i. type 1 aff. Fraxinus	0	0	0	0	1	1	0	1	1	0	0	0	0	0	0	0	0	0	0	0	0	0	0	0	0	0
Lamiales:Oleaceae:Oleeae:Fraxininae	Fraxinus	Melioides	Fraxinus berlandieriana A.DC.	Thompson et al. 1999 (B), PDB, GBIF	O.g.i. type 1 aff. Fraxinus	0	0	0	1	1	1	0	0	0	0	0	1	1	0	0	0	0	0	0	0	0	0	1	0	1	0
Lamiales:Oleaceae:Oleeae:Fraxininae	Fraxinus	Melioides	Fraxinus biltmoreana Beadle	FNA	O.g.i. type 1 aff. Fraxinus	0	0	0	0	1	1	0	0	0	0	0	0	0	0	0	0	0	0	0	0	0	0	0	0	0	0
Lamiales:Oleaceae:Oleeae:Fraxininae	Fraxinus	Melioides	Fraxinus caroliniana Mill.	Thompson et al. 1999 (B)	O.g.i. type 1 aff. Fraxinus	0	0	0	0	1	0	0	0	0	0	0	0	0	0	0	0	0	0	0	0	0	0	0	0	0	0
Lamiales:Oleaceae:Oleeae:Fraxininae	Fraxinus	Melioides	Fraxinus chiisanensis Nakai	Flora of Korea, Hueng Soo Lee et al. 2009	O.g.i. type 1 aff. Fraxinus	0	0	0	0	1	0	0	1	1	0	0	1	0	1	1	0	0	0	0	0	0	0	0	0	0	0
Lamiales:Oleaceae:Oleeae:Fraxininae	Fraxinus	Melioides	Fraxinus cuspidata Torr.	Thompson et al. 1999 (B), PDB, GBIF	O.g.i. type 1 aff. Fraxinus	0	0	0	0	1	1	0	0	0	0	0	0	0	0	0	0	0	1	1	0	0	0	1	1	0	0
Lamiales:Oleaceae:Oleeae:Fraxininae	Fraxinus	Melioides	Fraxinus latifolia Benth.	Thompson et al. 1999 (B)	O.g.i. type 1 aff. Fraxinus	0	0	0	0	0	0	0	0	0	0	0	0	0	0	0	0	0	1	1	0	0	0	0	0	0	0
Lamiales:Oleaceae:Oleeae:Fraxininae	Fraxinus	Melioides	Fraxinus papilosa Lingelsh.	Thompson et al. 1999 (B)	O.g.i. type 1 aff. Fraxinus	0	0	0	0	0	0	0	0	0	0	0	1	1	0	0	0	0	1	1	0	0	0	1	0	1	0
Lamiales:Oleaceae:Oleeae:Fraxininae	Fraxinus	Melioides	Fraxinus pennsylvanica Marshall	Thompson et al. 1999 (B)	O.g.i. type 1 aff. Fraxinus	0	0	0	0	1	1	0	1	1	1	0	0	0	1	1	0	0	0	0	0	0	0	0	1	0	0
Lamiales:Oleaceae:Oleeae:Fraxininae	Fraxinus	Melioides	Fraxinus platypoda Oliv.	Fang et al. 2011,FOC	O.g.i. type 1 aff. Fraxinus	0	0	0	0	1	0	0	0	0	0	0	1	1	1	1	0	0	0	0	0	0	0	0	1	0	0
Lamiales:Oleaceae:Oleeae:Fraxininae	Fraxinus	Melioides	Fraxinus profunda (Bush) Bush	Thompson et al. 1999 (B)	O.g.i. type 1 aff. Fraxinus	0	0	0	0	1	0	0	0	0	0	0	0	0	0	0	0	0	0	0	0	0	0	0	0	0	0
Lamiales:Oleaceae:Oleeae:Fraxininae	Fraxinus	Melioides	Fraxinus spaethiana Lingelsh.	FOJ	O.g.i. type 1 aff. Fraxinus	0	0	0	0	1	1	0	0	1	0	0	0	0	0	0	0	0	0	0	0	0	0	0	0	0	0
Lamiales:Oleaceae:Oleeae:Fraxininae	Fraxinus	Melioides	Fraxinus texensis A.Gray	Thompson et al. 1999 (B)	O.g.i. type 1 aff. Fraxinus	0	0	0	0	1	0	0	0	0	0	0	0	0	0	0	0	0	0	0	0	0	0	0	0	0	0
Lamiales:Oleaceae:Oleeae:Fraxininae	Fraxinus	Melioides	Fraxinus uhdei (Wenz.) Lingelsh.)	GBIF, Hisinger et al. 2013	O.g.i. type 1 aff. Fraxinus	0	1	1	1	0	1	0	0	0	0	0	0	1	0	0	0	0	0	0	0	0	0	0	0	0	0
Lamiales:Oleaceae:Oleeae:Fraxininae	Fraxinus	Melioides	Fraxinus velutina Torr.	Thompson et al. 1999 (B)	O.g.i. type 1 aff. Fraxinus	0	0	0	0	1	1	0	0	0	0	0	0	0	0	0	0	0	1	1	0	0	0	1	1	0	0
Lamiales:Oleaceae:Oleeae:Fraxininae	Fraxinus	Pauciflorae	Fraxinus dubia (Wild. Ex Schult. & Schult.f.) P.S.Green & M.Nee	GBIF, Hisinger et al. 2013		1	1	0	1	1	1	0	0	0	0	0	1	1	0	0	0	0	0	0	0	0	0	1	1	0	0
Lamiales:Oleaceae:Oleeae:Fraxininae	Fraxinus	Pauciflorae	Fraxinus gooddingii Little	GBIF, Hisinger et al. 2013		0	0	0	0	0	0	0	0	0	0	0	0	0	0	0	0	0	1	0	0	0	0	1	0	1	0
Lamiales:Oleaceae:Oleeae:Fraxininae	Fraxinus	Pauciflorae	Fraxinus greggii A.Gray + F. greggii ssp. goodingii (Little) A.E.Murray Kalima (=F. goodingii Little)	Thompson et al. 1999 (B), PDB, GBIF, Flora of Mecixo	O.g.i. type 1 aff. Fraxinus	0	0	0	1	1	1	0	0	0	0	0	1	1	0	0	0	0	1	1	0	0	0	1	1	1	0
Lamiales:Oleaceae:Oleeae:Fraxininae	Fraxinus	Pauciflorae	Fraxinus purpusii Brandgee	GBIF, Hisinger et al. 2013		0	1	0	1	1	1	0	0	0	0	0	1	1	0	0	0	0	0	0	0	0	0	0	0	0	0
Lamiales:Oleaceae:Oleeae:Fraxininae	Fraxinus	Pauciflorae	Fraxinus rufescens Lingelsh.	GBIF, Hisinger et al. 2013	O.g.i. type 1 aff. Fraxinus	0	0	0	0	1	1	0	0	0	0	0	1	1	0	0	0	0	0	0	0	0	0	1	1	0	0
Lamiales:Oleaceae:Oleeae:Fraxininae	Fraxinus	Fraxinus	Fraxinus angustifolia Vahl	Heuertz 2006, virtuellen floran, Caudullo et al 2017	O.g.i. type 1 aff. Fraxinus	0	0	0	0	1	1	0	0	1	1	0	0	0	0	0	0	0	1	1	0	1	0	0	1	0	0
Lamiales:Oleaceae:Oleeae:Fraxininae	Fraxinus	Fraxinus	Fraxinus excelsior L.	Heuertz 2006, virtuellen floran	O.g.i. type 1 aff. Fraxinus	0	0	0	0	1	1	0	0	1	1	0	0	0	0	0	0	0	1	1	0	1	0	0	0	0	0
Lamiales:Oleaceae:Oleeae:Fraxininae	Fraxinus	Fraxinus	Fraxinus mandschurica Rupr.	Fang et al. 2011,FOC	O.g.i. type 1 aff. Fraxinus	0	0	0	0	1	0	0	0	0	0	0	1	1	1	1	1	0	0	0	0	0	0	0	1	0	0
Lamiales:Oleaceae:Oleeae:Fraxininae	Fraxinus	Fraxinus	Fraxinus nigra Marshall	Thompson et al. 1999 (B), Hinsinger et al 2013, GBIF, PDB	O.g.i. type 1 aff. Fraxinus	0	0	0	0	1	1	0	1	1	1	0	0	0	0	0	0	0	0	0	0	0	0	0	0	0	0
Lamiales:Oleaceae:Oleeae:Fraxininae	Fraxinus	Fraxinus	Fraxinus pallisiae Wilmott (=F. holotricha Koehne)	GBIF	O.g.i. type 1 aff. Fraxinus	0	0	0	0	1	1	0	0	1	1	0	0	0	0	0	0	0	1	1	0	0	0	0	0	0	0
Lamiales:Oleaceae:Oleeae:Fraxininae	Fraxinus	Fraxinus	Fraxinus sogdiana Bunge	Fang et al. 2011,FOC	O.g.i. type 1 aff. Fraxinus	0	0	0	0	0	0	0	0	1	1	0	0	0	0	0	1	0	0	0	0	0	0	0	1	0	1
Lamiales:Oleaceae:Oleeae:Fraxininae	Fraxinus	Ornus	Fraxinus ornus L.	Browicz 1984 (3), Heuertz 2006	O.g.i. type 1 aff. Fraxinus	0	0	0	0	1	1	0	0	1	1	0	0	0	0	0	0	0	1	1	0	0	0	0	1	0	0
Lamiales:Oleaceae:Oleeae:Fraxininae	Fraxinus	Ornus	Fraxinus griffithii C.B.Clarke	Fang et al. 2011,FOC	O.g.i. type 1 aff. Fraxinus	0	1	0	1	1	1	0	0	0	0	0	1	1	0	0	0	0	0	0	0	0	0	0	0	0	0
Lamiales:Oleaceae:Oleeae:Fraxininae	Fraxinus	Ornus	Fraxinus chinensis Roxb. + Fraxinus chinensis ssp. Rhynchophylla (Hance) E.Murray	Fang et al. 2011,FOC	O.g.i. type 1 aff. Fraxinus	0	0	0	0	1	0	0	0	1	1	0	1	1	1	1	1	0	0	0	0	0	0	0	1	0	0
Lamiales:Oleaceae:Oleeae:Fraxininae	Fraxinus	Ornus	Fraxinus micrantha Lingelsh.	GBIF	O.g.i. type 1 aff. Fraxinus	0	0	0	0	0	0	0	0	0	0	0	1	1	0	0	0	0	0	0	0	0	0	0	0	0	0
Lamiales:Oleaceae:Oleeae:Fraxininae	Fraxinus	Ornus	Fraxinus longicuspis Sieb. & Zucc.	FOJ, GBIF	O.g.i. type 1 aff. Fraxinus	0	0	0	0	1	1	0	0	1	0	0	0	0	0	0	0	0	0	0	0	0	0	0	0	0	0
Lamiales:Oleaceae:Oleeae:Fraxininae	Fraxinus	Ornus	Fraxinus floribunda Wall.	Fang et al. 2011,FOC	O.g.i. type 1 aff. Fraxinus	0	1	0	1	1	1	1	0	0	0	0	1	1	0	0	0	0	0	0	0	0	0	0	0	0	0
Lamiales:Oleaceae:Oleeae:Fraxininae	Fraxinus	Ornus	Fraxinus insularis Hemsl.	Fang et al. 2011,FOC	O.g.i. type 1 aff. Fraxinus	0	0	0	0	1	1	0	0	0	0	0	1	1	0	0	0	0	0	0	0	0	0	0	0	0	0
Lamiales:Oleaceae:Oleeae:Fraxininae	Fraxinus	Ornus	Fraxinus ferruginea Lingelsh.	Fang et al. 2011,FOC	O.g.i. type 1 aff. Fraxinus	0	0	0	0	1	0	0	0	0	0	0	1	1	0	0	0	0	0	0	0	0	0	0	0	0	0
Lamiales:Oleaceae:Oleeae:Fraxininae	Fraxinus	Ornus	Fraxinus bungeana A.DC.	Fang et al. 2011,FOC	O.g.i. type 1 aff. Fraxinus	0	0	0	0	1	0	0	0	0	0	0	1	1	1	1	0	0	0	0	0	0	0	0	1	0	0
Lamiales:Oleaceae:Oleeae:Fraxininae	Fraxinus	Ornus	Fraxinus paxiana Lingelsh. + F. paxiana depauperata (Lingelsh.) Z.Wei	Fang et al. 2011,FOC	O.g.i. type 1 aff. Fraxinus	0	0	0	0	1	0	0	0	0	0	0	1	1	0	1	1	0	0	0	0	0	0	0	0	0	0
Lamiales:Oleaceae:Oleeae:Fraxininae	Fraxinus	Ornus	Fraxinus sikkimensis (lingsh.) Hand.-Mazz.	Fang et al. 2011,FOC	O.g.i. type 1 aff. Fraxinus	0	0	0	0	0	0	0	0	0	0	0	1	1	0	1	0	0	0	0	0	0	0	0	1	0	0
Lamiales:Oleaceae:Oleeae:Fraxininae	Fraxinus	Ornus	Fraxinus sieboldiana Blume	Fang et al. 2011,FOC	O.g.i. type 1 aff. Fraxinus	0	0	0	0	1	0	0	0	0	0	0	0	0	0	0	0	0	0	0	0	0	0	0	0	0	0
Lamiales:Oleaceae:Oleeae:Fraxininae	Fraxinus	Ornus	Fraxinus trifoliata W.W.Smith	Fang et al. 2011,FOC	O.g.i. type 1 aff. Fraxinus	0	0	0	0	0	0	0	0	0	0	0	1	1	0	0	1	0	0	0	0	0	0	0	1	0	0
Lamiales:Oleaceae:Oleeae:Fraxininae	Fraxinus	Ornus	Fraxinus apertisquamifera Hara	FOJ, GBIF	O.g.i. type 1 aff. Fraxinus	0	0	0	0	1	1	0	0	1	1	0	0	0	0	0	0	0	0	0	0	0	0	0	0	0	0
Lamiales:Oleaceae:Oleeae:Fraxininae	Fraxinus	Ornus	Fraxinus lanuginosa Koidz.	FOJ, GBIF	O.g.i. type 1 aff. Fraxinus	0	0	0	0	1	1	0	0	1	1	0	0	0	0	0	0	0	0	0	0	0	0	0	0	0	0
Lamiales:Oleaceae:Oleeae:Fraxininae	Fraxinus	Ornus	Fraxinus baroniana Diels	Fang et al. 2011,FOC	O.g.i. type 1 aff. Fraxinus	0	0	0	0	1	0	0	0	0	0	0	1	1	0	0	0	0	0	0	0	0	0	0	0	0	0
Lamiales:Oleaceae:Oleeae:Fraxininae	Fraxinus	Ornus	Fraxinus malacophylla Hemsl.	Fang et al. 2011,FOC	O.g.i. type 1 aff. Fraxinus	0	0	0	0	0	0	0	0	0	0	0	1	1	0	0	0	0	0	0	0	0	0	0	0	0	0
Lamiales:Oleaceae:Oleeae:Fraxininae	Fraxinus	Ornus	Fraxinus raibocarpa Regel	GBIF, FOP	O.g.i. type 1 aff. Fraxinus	0	0	0	0	1	1	0	1	1	0	0	0	0	0	0	0	0	0	0	0	0	0	0	0	0	0
Lamiales:Oleaceae:Oleeae:Fraxininae	Fraxinus	?	Fraxinus retusifoliata Feng ex P.Ybai	Fang et al. 2011,FOC	O.g.i. type 1 aff. Fraxinus	0	0	0	0	0	0	0	0	0	0	0	1	1	0	0	0	0	0	0	0	0	0	0	1	0	0
Lamiales:Oleaceae:Oleeae:Fraxininae	Fraxinus	?	Fraxinus punctata S.Y.Hu	Fang et al. 2011,FOC	O.g.i. type 1 aff. Fraxinus	0	0	0	0	1	0	0	0	0	0	0	1	0	0	0	0	0	0	0	0	0	0	0	0	0	0
Lamiales:Oleaceae:Oleeae:Fraxininae	Fraxinus	?	Fraxinus odontocalyx Hand.-Mazz.	Fang et al. 2011,FOC	O.g.i. type 1 aff. Fraxinus	0	0	0	0	1	1	0	0	0	0	0	1	1	0	0	0	0	0	0	0	0	0	0	0	0	0
Lamiales:Oleaceae:Oleeae:Fraxininae	Fraxinus	?	Fraxinus stylosa Lingelsh. in Engler	Fang et al. 2011,FOC	O.g.i. type 1 aff. Fraxinus	0	0	0	0	1	0	0	0	0	0	0	1	1	0	1	1	0	0	0	0	0	0	0	1	0	0
Lamiales:Oleaceae:Oleeae:Fraxininae	Fraxinus	Sciadanthus	Fraxinus xanthoxyloides (G.Don) DC.	Browicz 1984 (3), Fang et al. 2011,FOC	O.g.i. type 1 aff. Fraxinus	0	0	0	0	1	1	0	0	1	1	0	0	0	0	0	0	0	1	1	0	0	0	0	1	0	0
Lamiales:Oleaceae:Oleeae:Fraxininae	Fraxinus	Sciadanthus	Fraxinus hupehensis S.T.Chu & C.B.Shang	Fang et al. 2011,FOC	O.g.i. type 1 aff. Fraxinus	0	0	0	0	1	0	0	0	0	0	0	0	0	0	0	0	0	0	0	0	0	0	0	0	0	0
Lamiales:Oleaceae:Oleeae:Oleinae	Phillyrea		Phillyrea angustifolia L.	GBIF	O.g.i. type 2	0	0	0	0	1	1	0	0	0	0	0	0	0	0	0	0	0	1	1	0	0	0	0	1	0	0
Lamiales:Oleaceae:Oleeae:Oleinae	Phillyrea		Phillyrea latifolia L.	Browicz 1984 (3), GBIF	O.g.i. type 2	0	0	0	0	1	1	0	0	0	0	0	0	0	0	0	0	0	1	1	0	0	0	0	1	0	0
Lamiales:Oleaceae:Oleeae:Oleinae	Osmanthus	Sect. Leiolea	Osmanthus americanus (L.)	GBIF, PDB	O.g.i. type 3,5	0	0	0	1	1	1	0	0	0	0	0	1	1	0	0	0	0	0	0	0	0	0	0	0	0	0
Lamiales:Oleaceae:Oleeae:Oleinae	Osmanthus	Sect. Leiolea	Osmanthus matsumuranus Hayata	Fang et al. 2011,FOC	O.g.i. type 3,5	0	1	0	1	1	1	0	0	0	0	0	1	1	0	0	0	0	0	0	0	0	0	0	0	0	0
Lamiales:Oleaceae:Oleeae:Oleinae	Osmanthus	Sect. Leiolea	Osmanthus minor P.S.Green	Fang et al. 2011,FOC	O.g.i. type 3,5	0	0	0	0	1	0	0	0	0	0	0	1	0	0	0	0	0	0	0	0	0	0	0	0	0	0
Lamiales:Oleaceae:Oleeae:Oleinae	Osmanthus	Sect. Chionanthus+Osmanthus	Osmanthus attenuatus P.S.Green	Fang et al. 2011,FOC	O.g.i. type 3,5	0	0	0	1	1	1	0	0	0	0	0	1	1	0	0	0	0	0	0	0	0	0	0	0	0	0
Lamiales:Oleaceae:Oleeae:Oleinae	Osmanthus	Sect. Chionanthus+Osmanthus	Osmanthus gracilinervis L.C.Chia	Fang et al. 2011,FOC	O.g.i. type 3,5	0	0	0	0	1	0	0	0	0	0	0	1	0	0	0	0	0	0	0	0	0	0	0	0	0	0
Lamiales:Oleaceae:Oleeae:Oleinae	Osmanthus	Sect. Chionanthus+Osmanthus	Osmanthus yunnanensis (Franch.) P.S.Green	Fang et al. 2011,FOC	O.g.i. type 3,5	0	0	0	0	1	1	0	0	0	0	0	1	1	0	1	1	0	0	0	0	0	0	1	0	0	0
Lamiales:Oleaceae:Oleeae:Oleinae	Osmanthus	Sect. Siphosmanthus	Osmanthus delavayi Franch.	Fang et al. 2011,FOC	O.g.i. type 3,5	0	0	0	0	1	0	0	0	0	0	0	1	1	0	0	1	0	0	0	0	0	0	1	0	0	0
Lamiales:Oleaceae:Oleeae:Oleinae	Osmanthus	Sect. Siphosmanthus	Osmanthus suavis King ex C.B.Clarke	Fang et al. 2011,FOC	O.g.i. type 3,5	0	0	0	0	0	0	0	0	0	0	0	1	1	0	0	0	0	0	0	0	0	0	1	0	0	0
Lamiales:Oleaceae:Oleeae:Oleinae	Osmanthus	Sect.marginantus+Osmantus-Linocieroides	Osmanthus venosus Pamp.	Fang et al. 2011,FOC	O.g.i. type 3,5	0	0	0	0	1	1	0	0	0	0	0	1	1	0	0	0	0	0	0	0	0	0	0	0	0	0
Lamiales:Oleaceae:Oleeae:Oleinae	Osmanthus	Sect.marginantus+Osmantus-Linocieroides	Osmanthus urceolatus P.S.Green	Fang et al. 2011,FOC	O.g.i. type 3,5	0	0	0	0	1	1	0	0	0	0	0	1	1	0	0	0	0	0	0	0	0	0	0	0	0	0
Lamiales:Oleaceae:Oleeae:Oleinae	Osmanthus	Sect.marginantus+Osmantus-Linocieroides	Osmanthus pubipedicellatus L.C:Chia ex H.T.Chang	Fang et al. 2011,FOC	O.g.i. type 3,5	0	0	0	0	1	0	0	0	0	0	0	0	0	0	0	0	0	0	0	0	0	0	0	0	0	0
Lamiales:Oleaceae:Oleeae:Oleinae	Osmanthus	Sect.marginantus+Osmantus-Linocieroides	Osmanthus armatus Diels	Fang et al. 2011,FOC	O.g.i. type 3,5	0	0	0	0	1	1	0	0	0	0	0	1	1	0	0	0	0	0	0	0	0	0	0	0	0	0
Lamiales:Oleaceae:Oleeae:Oleinae	Osmanthus	Sect.marginantus+Osmantus-Linocieroides	Osmanthus cooperi Hemsl.	Fang et al. 2011,FOC	O.g.i. type 3,5	0	0	0	0	1	0	0	0	0	0	0	0	0	0	0	0	0	0	0	0	0	0	0	0	0	0
Lamiales:Oleaceae:Oleeae:Oleinae	Osmanthus	Sect.marginantus+Osmantus-Linocieroides	Osmanthus haianensis P.S.Green	Fang et al. 2011,FOC	O.g.i. type 3,5	0	1	0	1	0	0	0	0	0	0	0	1	0	0	0	0	0	0	0	0	0	0	0	0	0	0
Lamiales:Oleaceae:Oleeae:Oleinae	Osmanthus	Sect.marginantus+Osmantus-Linocieroides	Osmanthus didymopetalus P.S.Green	Fang et al. 2011,FOC	O.g.i. type 3,5	0	1	0	1	1	0	0	0	0	0	0	1	0	0	0	0	0	0	0	0	0	0	0	0	0	0
Lamiales:Oleaceae:Oleeae:Oleinae	Osmanthus	Sect.marginantus+Osmantus-Linocieroides	Osamnthus marginatus (Chanmp. Ex Benth.) Hemsl.	Fang et al. 2011,FOC	O.g.i. type 3,5	0	1	0	1	1	1	0	0	0	0	0	1	1	0	0	0	0	0	0	0	0	0	0	0	0	0
Lamiales:Oleaceae:Oleeae:Oleinae	Osmanthus	Sect.marginantus+Osmantus-Linocieroides	Osmnathus reticulatus P.S.Green	Fang et al. 2011,FOC	O.g.i. type 3,5	0	0	0	0	1	1	0	0	0	0	0	1	1	0	0	0	0	0	0	0	0	0	0	0	0	0
Lamiales:Oleaceae:Oleeae:Oleinae	Osmanthus	Sect.marginantus+Osmantus-Linocieroides	Osmanthus fragrans (Thunb.) Lour.	Fang et al. 2011,FOC	O.g.i. type 3,5	0	1	0	1	1	1	0	0	0	0	0	1	1	1	1	0	0	0	0	0	0	0	0	1	0	0
Lamiales:Oleaceae:Oleeae:Oleinae	Osmanthus	Sect.marginantus+Osmantus-Linocieroides	Osmanthus fordii Hemsl.	Fang et al. 2011,FOC	O.g.i. type 3,5	0	0	0	0	1	0	0	0	0	0	0	1	1	0	0	0	0	0	0	0	0	0	0	0	0	0
Lamiales:Oleaceae:Oleeae:Oleinae	Osmanthus	Sect.marginantus+Osmantus-Linocieroides	Osmanthus henryi P.S.Green	Fang et al. 2011,FOC	O.g.i. type 3,5	0	0	0	0	1	0	0	0	0	0	0	1	1	0	0	0	0	0	0	0	0	0	1	0	0	0
Lamiales:Oleaceae:Oleeae:Oleinae	Osmanthus	Sect.marginantus+Osmantus-Linocieroides	Osmanthus heterophyllus (G.Don) P.S.Green	Fang et al. 2011,FOC	O.g.i. type 3,5	0	0	0	0	1	1	0	0	0	0	0	1	1	0	0	0	0	0	0	0	0	0	0	0	0	0
Lamiales:Oleaceae:Oleeae:Oleinae	Osmanthus	Sect.marginantus+Osmantus-Linocieroides	Osmanthus serrulatus Rehder	Fang et al. 2011,FOC	O.g.i. type 3,5	0	0	0	0	1	0	0	0	0	0	0	1	1	0	0	0	0	0	0	0	0	0	0	0	0	0
Lamiales:Oleaceae:Oleeae:Oleinae	Osmanthus	?	Osmanthus mexicana Lundell	GBIF	O.g.i. type 3,5	0	0	0	1	1	1	0	0	0	0	0	0	1	0	0	0	0	0	0	0	0	0	0	0	0	0
Lamiales:Oleaceae:Oleeae:Oleinae	Osmanthus	?	Osmanthus enervius Masamune & K.Mori	Fang et al. 2011,FOC	O.g.i. type 3,5	0	0	0	0	1	1	0	0	0	0	0	1	0	0	0	0	0	0	0	0	0	0	0	0	0	0
Lamiales:Oleaceae:Oleeae:Oleinae	Osmanthus	?	Osmanthus lanceolatus Hayata	Fang et al. 2011,FOC	O.g.i. type 3,5	0	0	0	0	1	1	0	0	0	0	0	0	0	0	0	0	0	0	0	0	0	0	0	0	0	0
Lamiales:Oleaceae:Oleeae:Oleinae	Osmanthus	?	Osmanthus decorus (Boiss. & Balansa) Kasapl.	Browicz 1984 (3)	O.g.i. type 3,5	0	0	0	0	1	1	0	0	1	1	0	0	0	0	0	0	0	1	1	0	0	0	0	0	0	0
Lamiales:Oleaceae:Oleeae:Oleinae	Chionanthus		Chionanthus axiliflorus (Griseb.) Stearn	GBIF, PDB	O.g.i. type 4	0	1	0	1	0	0	0	0	0	0	0	0	0	0	0	0	0	0	0	0	0	0	0	0	0	0
Lamiales:Oleaceae:Oleeae:Oleinae	Chionanthus		Chionanthus brachythyrsus (Merr.) P.S.Green	Fang et al. 2011,FOC	O.g.i. type 4	0	0	0	1	0	0	0	0	0	0	0	1	0	0	0	0	0	0	0	0	0	0	0	0	0	0
Lamiales:Oleaceae:Oleeae:Oleinae	Chionanthus		Chionanthus compactus Sw.	GBIF, PDB	O.g.i. type 4	1	1	0	1	0	0	0	0	0	0	0	0	0	0	0	0	0	0	0	0	0	0	0	0	0	0
Lamiales:Oleaceae:Oleeae:Oleinae	Chionanthus		Chionanthus domingensis Lam.	GBIF, PDB	O.g.i. type 4	1	1	0	1	0	0	0	0	0	0	0	0	0	0	0	0	0	0	0	0	0	0	0	0	0	0
Lamiales:Oleaceae:Oleeae:Oleinae	Chionanthus		Chionanthus guangxiensis B.M.Miao	Fang et al. 2011,FOC	O.g.i. type 4	0	0	0	0	0	0	0	0	0	0	0	1	0	0	0	0	0	0	0	0	0	0	0	0	0	0
Lamiales:Oleaceae:Oleeae:Oleinae	Chionanthus		Chionanthus hainanensis (Merr. & CHun)B.M.Miao	Fang et al. 2011,FOC	O.g.i. type 4	0	1	0	1	1	1	0	0	0	0	0	1	0	0	0	0	0	0	0	0	0	0	0	0	0	0
Lamiales:Oleaceae:Oleeae:Oleinae	Chionanthus		Chionanthus henryanus P.S.Green	Fang et al. 2011,FOC	O.g.i. type 4	0	1	0	0	0	0	0	0	0	0	0	1	1	0	0	0	0	0	0	0	0	0	0	0	0	0
Lamiales:Oleaceae:Oleeae:Oleinae	Chionanthus		Chionanthus ligustrinus Pers.	GBIF, PDB	O.g.i. type 4	1	1	0	1	1	0	0	0	0	0	0	0	1	0	0	0	0	0	0	0	0	0	0	0	0	0
Lamiales:Oleaceae:Oleeae:Oleinae	Chionanthus		Chionanthus longiflorus (H.L.Li) B.M.Miao	Fang et al. 2011,FOC	O.g.i. type 4	0	0	0	0	0	0	0	0	0	0	0	1	1	0	0	0	0	0	0	0	0	0	0	0	0	0
Lamiales:Oleaceae:Oleeae:Oleinae	Chionanthus		Chionanthus ramiflorus Roxb.	Fang et al. 2011,FOC	O.g.i. type 4	0	1	0	1	1	1	1	0	0	0	0	1	1	0	1	1	0	0	0	0	0	0	0	0	0	0
Lamiales:Oleaceae:Oleeae:Oleinae	Chionanthus		Chionanthus retusus Lindl. & Paxton	Fang et al. 2011,FOC	O.g.i. type 4	0	0	0	0	0	1	1	0	0	0	0	1	1	1	1	1	0	0	0	0	0	0	0	1	0	0
Lamiales:Oleaceae:Oleeae:Oleinae	Chionanthus		Chionanthus sessiliflorus (Hemsl.) Kiew	GBIF, PDB	O.g.i. type 4	1	1	0	1	1	0	0	0	0	0	0	0	0	0	0	0	0	0	0	0	0	0	0	0	0	0
Lamiales:Oleaceae:Oleeae:Oleinae	Chionanthus		Chionanthus virginicus L.	GBIF, PDB	O.g.i. type 4	0	0	0	0	1	1	0	0	0	0	0	0	0	0	0	0	0	0	0	0	0	0	0	0	0	0
Lamiales:Oleaceae:Oleeae:Oleinae	Chionanthus		Chionanthuspygmeus Small	GBIF, PDB	O.g.i. type 4	0	0	0	0	1	0	0	0	0	0	0	0	0	0	0	0	0	0	0	0	0	0	0	0	0	0
Lamiales:Oleaceae:Oleeae:Oleinae	Olea		Olea brachiata (Lour.) Merr.	Fang et al. 2011,FOC	O.g.i. type 3, 4, 5	0	1	0	1	0	0	0	0	0	0	0	1	0	0	0	0	0	0	0	0	0	0	0	0	0	0
Lamiales:Oleaceae:Oleeae:Oleinae	Olea		Olea capensis L.	GBIF	O.g.i. type 3, 4, 5	1	1	1	1	1	1	0	0	0	0	0	1	1	0	0	0	0	1	1	0	0	0	1	0	0	0
Lamiales:Oleaceae:Oleeae:Oleinae	Olea		Olea caudatilimba L.C.Chia	Fang et al. 2011,FOC	O.g.i. type 3, 4, 5	0	0	0	0	0	0	0	0	0	0	0	1	1	0	0	0	0	0	0	0	0	0	0	0	0	0
Lamiales:Oleaceae:Oleeae:Oleinae	Olea		Olea europaea ssp. cerasiformis (Webb & Berthel.) G.Kunkel & Sunding	Bersnard 2016	O.g.i. type 3, 4, 5	0	0	0	0	0	0	0	0	0	0	0	0	0	0	0	0	0	1	0	0	0	0	0	0	0	0
Lamiales:Oleaceae:Oleeae:Oleinae	Olea		Olea europaea ssp. Cuspidata (Waallich ex G.Don) Ciferri	Bersnard 2016	O.g.i. type 3, 4, 5	1	1	1	1	1	1	0	0	0	0	0	1	1	0	0	0	0	1	1	0	0	0	1	1	1	1
Lamiales:Oleaceae:Oleeae:Oleinae	Olea		Olea europaea ssp. europaea	Bersnard 2016	O.g.i. type 3, 4, 5	0	0	0	0	1	0	0	0	0	0	0	0	0	0	0	0	0	1	1	0	0	0	1	1	0	0
Lamiales:Oleaceae:Oleeae:Oleinae	Olea		Olea europaea ssp. gauchica	Bersnard 2016	O.g.i. type 3, 4, 5	0	0	0	0	0	0	0	0	0	0	0	0	0	0	0	0	0	1	1	0	0	0	1	0	1	1
Lamiales:Oleaceae:Oleeae:Oleinae	Olea		Olea europaea ssp. laperrinei	Bersnard 2016	O.g.i. type 3, 4, 5	0	0	0	0	0	0	0	0	0	0	0	0	0	0	0	0	0	0	0	0	0	0	0	0	1	1
Lamiales:Oleaceae:Oleeae:Oleinae	Olea		Olea europaea ssp. maroccana (Greuter & Burdet) P.Vargas, J.Hess, Muñoz Garm. & Kardereit	Bersnard 2016	O.g.i. type 3, 4, 5	0	0	0	0	0	0	0	0	0	0	0	0	0	0	0	0	0	0	1	0	0	0	1	1	0	0
Lamiales:Oleaceae:Oleeae:Oleinae	Olea		Olea exasperata Jacq.	GBIF	O.g.i. type 3, 4, 5	0	0	0	0	1	0	0	0	0	0	0	0	0	0	0	0	0	1	1	0	0	0	1	1	0	0
Lamiales:Oleaceae:Oleeae:Oleinae	Olea		Olea gauangxiensis B.M.Miao	Fang et al. 2011,FOC	O.g.i. type 3, 4, 5	0	0	0	0	1	1	0	0	0	0	0	1	1	0	0	0	0	0	0	0	0	0	0	0	0	0
Lamiales:Oleaceae:Oleeae:Oleinae	Olea		Olea haianensis H.L.Li	Fang et al. 2011,FOC	O.g.i. type 3, 4, 5	0	1	0	1	1	0	0	0	0	0	0	1	0	0	0	0	0	0	0	0	0	0	0	0	0	0
Lamiales:Oleaceae:Oleeae:Oleinae	Olea		Olea laxiflora H.L.Li	Fang et al. 2011,FOC	O.g.i. type 3, 4, 5	0	0	0	0	0	0	0	0	0	0	0	1	1	0	0	0	0	0	0	0	0	0	0	0	0	0
Lamiales:Oleaceae:Oleeae:Oleinae	Olea		Olea neriifolia H.L.Li	Fang et al. 2011,FOC	O.g.i. type 3, 4, 5	0	1	0	1	0	0	0	0	0	0	0	1	0	0	0	0	0	0	0	0	0	0	0	0	0	0
Lamiales:Oleaceae:Oleeae:Oleinae	Olea		Olea paniculata R.Br.	Fang et al. 2011,FOC	O.g.i. type 3, 4, 5	0	0	0	1	0	0	0	0	0	0	0	1	1	0	0	0	0	0	0	0	0	0	0	0	0	0
Lamiales:Oleaceae:Oleeae:Oleinae	Olea		Olea parvilimba (Merr. & Chun) B.M.Miao	Fang et al. 2011,FOC	O.g.i. type 3, 4, 5	0	1	0	1	0	0	0	0	0	0	0	1	0	0	0	0	0	0	0	0	0	0	0	0	0	0
Lamiales:Oleaceae:Oleeae:Oleinae	Olea		Olea rosea Craib.	Fang et al. 2011,FOC	O.g.i. type 3, 4, 5	0	0	0	1	0	0	0	0	0	0	0	1	1	0	0	0	0	0	0	0	0	0	0	0	0	0
Lamiales:Oleaceae:Oleeae:Oleinae	Olea		Olea salicifolia Wall. Ex Don	Fang et al. 2011,FOC	O.g.i. type 3, 4, 5	0	0	0	0	0	0	0	0	0	0	0	1	1	0	0	0	0	0	0	0	0	0	0	0	0	0
Lamiales:Oleaceae:Oleeae:Oleinae	Olea		Olea tetragonoclada L.C.Chia	Fang et al. 2011,FOC	O.g.i. type 3, 4, 5	0	0	0	0	0	0	0	0	0	0	0	1	1	0	0	0	0	0	0	0	0	0	0	0	0	0
Lamiales:Oleaceae:Oleeae:Oleinae	Olea		Olea tsoongii (Merr.) P.S.Green	Fang et al. 2011,FOC	O.g.i. type 3, 4, 5	0	1	0	1	0	0	0	0	0	0	0	1	1	0	0	0	0	0	0	0	0	0	1	0	0	0
Lamiales:Oleaceae:Oleeae:Oleinae	Olea		Olea welwitschii Gilg & G.Schellenb.	GBIF	O.g.i. type 3, 4, 5	1	1	0	1	0	1	0	0	0	0	0	0	0	0	0	0	0	0	0	0	0	0	0	0	0	0
Lamiales:Oleaceae:Oleeae:Oleinae	Olea		Olea woodiana Knobl.	GBIF	O.g.i. type 3, 4, 5	0	0	0	1	1	1	0	0	0	0	0	1	1	0	0	0	0	0	1	0	0	0	0	0	0	0
Lamiales:Oleaceae:Oleeae:Oleinae	Noronhia			GBIF		1	1	1	1	1	1	0	0	0	0	0	1	1	0	0	0	0	1	1	0	0	0	0	1	0	0
Solanales: Convolvulaceae	Convolvulus			GBIF	Convolvulus sp.	1	1	1	1	1	1	1	1	1	1	1	1	1	1	1	1	0	1	1	1	1	1	1	1	1	1
Aquifoliales: Aquifoliaceae	Ilex			GBIF	Ilex sp.	1	1	1	1	1	1	1	0	0	0	0	1	1	1	0	0	0	1	1	0	0	0	0	0	0	0
Asterales: Asteraceae				GBIF	Asteroioideae, Cichorioideae	1	1	1	1	1	1	1	1	1	1	1	1	1	1	1	1	1	1	1	1	1	1	1	1	1	1
Asterales: Campanulaceae				GBIF	Campanuloideae gen. indet.	1	1	1	1	1	1	1	1	1	1	1	1	1	1	1	1	1	1	1	1	1	1	1	1	1	1
Apiales: Apiaceae				GBIF	Apiaceae spp.	1	1	1	1	1	1	1	1	1	1	1	1	1	1	1	1	1	1	1	1	1	1	1	1	1	1
Apiales: Araliaceae				GBIF	Araliaceae gen. indet.	1	1	1	1	1	1	1	1	1	1	1	1	1	1	1	1	1	1	1	1	1	1	1	1	1	1
Dipsacales: Adoxaceae	Viburnum	Sect. Coriacea	Viburnum beccarii Gamble	GBIF, Clement & Donoghue 2012	Viburnum sp.	1	0	0	0	0	0	0	0	0	0	0	0	0	0	0	0	0	0	0	0	0	0	0	0	0	0
Dipsacales: Adoxaceae	Viburnum	Sect. Coriacea	Viburnum coriaceum Bl.	GBIF, Clement & Donoghue 2012	Viburnum sp.	1	1	0	1	0	0	0	0	0	0	0	0	0	0	0	0	0	0	0	0	0	0	0	0	0	0
Dipsacales: Adoxaceae	Viburnum	Sect. Coriacea	Viburnum cornutidens Merr.	GBIF, Clement & Donoghue 2012	Viburnum sp.	1	0	0	0	0	0	0	0	0	0	0	0	0	0	0	0	0	0	0	0	0	0	0	0	0	0
Dipsacales: Adoxaceae	Viburnum	Sect. Coriacea	Viburnum crassifolium Rehder	Clement & Donoghue 2012	Viburnum sp.	0	0	0	0	0	0	0	0	0	0	0	0	0	0	0	0	0	0	0	0	0	0	0	0	0	0
Dipsacales: Adoxaceae	Viburnum	Sect. Coriacea	Viburnum cylindricum Buch.-Ham ex D.Don	FOC, Fang et al. 2011, GBIF, Clement & Donoghue 2012	Viburnum sp.	0	0	0	1	1	1	0	0	0	0	0	1	1	0	0	0	0	0	0	0	0	0	0	0	0	0
Dipsacales: Adoxaceae	Viburnum	Sect. Coriacea	Viburnum glaberrimum Merr.	GBIF, Clement & Donoghue 2012	Viburnum sp.	1	0	0	0	0	0	0	0	0	0	0	1	0	0	0	0	0	0	0	0	0	0	0	0	0	0	too few geo-referenced points
Dipsacales: Adoxaceae	Viburnum	Sect. Coriacea	Viburnum hebanthum Wright & Arn.	GBIF, Clement & Donoghue 2012	Viburnum sp.	0	0	0	1	0	0	0	0	0	0	0	0	0	0	0	0	0	0	0	0	0	0	0	0	0	0
Dipsacales: Adoxaceae	Viburnum	Sect. Coriacea	Viburnum platyphyllum Merr.	GBIF, Clement & Donoghue 2012	Viburnum sp.	0	0	0	0	0	0	0	0	0	0	0	0	0	0	0	0	0	0	0	0	0	0	0	0	0	0
Dipsacales: Adoxaceae	Viburnum	Sect. Lantana	Viburnum buddleifolium C.H.Wright	FOC, GBIF, Clement & Donoghue 2012	Viburnum sp.	0	0	0	0	1	0	0	0	0	0	0	1	0	0	0	0	0	0	0	0	0	0	0	0	0	0
Dipsacales: Adoxaceae	Viburnum	Sect. Lantana	Viburnum burejaeticum Regel & Herd.	FOC, Fang et al. 2011, GBIF, Clement & Donoghue 2012	Viburnum sp.	0	0	0	0	1	0	0	0	0	0	0	1	0	1	1	1	0	0	0	0	0	0	0	1	0	1
Dipsacales: Adoxaceae	Viburnum	Sect. Lantana	Viburnum carlesii Hemsley	GBIF, Clement & Donoghue 2012	Viburnum sp.	0	0	0	0	1	0	0	0	0	0	0	1	0	1	1	0	0	0	0	0	0	0	0	0	0	0
Dipsacales: Adoxaceae	Viburnum	Sect. Lantana	Viburnum chinshanense Graeber	FOC, Fang et al. 2011, GBIF	Viburnum sp.	0	0	0	0	1	1	0	0	0	0	0	1	1	0	0	0	0	0	0	0	0	0	0	0	0	0
Dipsacales: Adoxaceae	Viburnum	Sect. Lantana	Viburnum congestum Rehder in Sarg.	FOC, Fang et al. 2011, GBIF	Viburnum sp.	0	0	0	0	1	0	0	0	0	0	0	1	1	0	0	0	0	0	0	0	0	0	0	0	0	0
Dipsacales: Adoxaceae	Viburnum	Sect. Lantana	Viburnum cotinifolium D.Don	FOC, FOP, Fang et al. 2011, GBIF	Viburnum sp.	0	0	0	0	1	1	0	0	0	0	0	1	1	0	0	0	0	0	0	0	0	0	0	0	0	0
Dipsacales: Adoxaceae	Viburnum	Sect. Lantana	Viburnum glomeratum Maxim.	FOC, Fang et al. 2011, GBIF, Clement & Donoghue 2012	Viburnum sp.	0	0	0	0	1	1	0	0	0	0	0	1	1	1	1	1	0	0	0	0	0	0	0	0	0	0
Dipsacales: Adoxaceae	Viburnum	Sect. Lantana	Viburnum lantana L.	GBIF, Clement & Donoghue 2012	Viburnum sp.	0	0	0	0	1	1	0	1	1	0	0	1	1	0	0	0	0	0	0	0	0	0	0	0	0	0
Dipsacales: Adoxaceae	Viburnum	Sect. Lantana	Viburnum macrocephalum Fortune	FOC, Fang et al. 2011, GBIF, Clement & Donoghue 2012	Viburnum sp.	0	0	0	0	1	1	0	0	0	0	0	1	1	0	0	0	0	0	0	0	0	0	0	0	0	0
Dipsacales: Adoxaceae	Viburnum	Sect. Lantana	Viburnum mongolicum (Pall.) Rehde	FOC, Fang et al. 2011, GBIF, Clement & Donoghue 2012	Viburnum sp.	0	0	0	0	0	0	0	0	0	0	0	1	1	1	1	1	0	0	0	0	0	0	0	1	0	1
Dipsacales: Adoxaceae	Viburnum	Sect. Lantana	Viburnum rhytidophyllum Hemsl. ex Forb. & Hemsl.	FOC, Fang et al. 2011, GBIF, Clement & Donoghue 2012	Viburnum sp.	0	0	0	0	1	1	0	0	0	0	0	1	1	0	1	0	0	0	0	0	0	0	0	0	0	0
Dipsacales: Adoxaceae	Viburnum	Sect. Lantana	Viburnum schensianum Maxim.	FOC, Fang et al. 2011, GBIF, Clement & Donoghue 2012	Viburnum sp.	0	0	0	0	1	0	0	0	0	0	0	1	1	1	1	0	0	0	0	0	0	0	0	1	0	0
Dipsacales: Adoxaceae	Viburnum	Sect. Lantana	Viburnum utile Hemsl.	FOC, Fang et al. 2011, GBIF, Clement & Donoghue 2012	Viburnum sp.	0	0	0	0	1	1	0	0	0	0	0	1	1	0	0	0	0	0	0	0	0	0	0	0	0	0
Dipsacales: Adoxaceae	Viburnum	Sect. Lentago	Viburnum elatum Benth,	GBIF, Clement & Donoghue 2012	Viburnum sp.	0	0	0	0	1	1	0	0	0	0	0	1	1	0	0	0	0	0	0	0	0	0	0	0	0	0
Dipsacales: Adoxaceae	Viburnum	Sect. Lentago	Viburnum lentago L	PDB, GBIF	Viburnum sp.	0	0	0	0	1	1	0	1	1	1	0	0	0	0	0	0	0	0	0	0	0	0	0	0	0	0
Dipsacales: Adoxaceae	Viburnum	Sect. Lentago	Viburnum nudum L.	PDB, GBIF	Viburnum sp.	0	0	0	0	1	1	0	1	1	1	0	0	0	0	0	0	0	0	0	0	0	0	0	0	0	0
Dipsacales: Adoxaceae	Viburnum	Sect. Lentago	Viburnum obovatum Walter	PDB, GBIF	Viburnum sp.	0	0	0	1	1	0	0	0	0	0	0	0	0	0	0	0	0	0	0	0	0	0	0	0	0	0
Dipsacales: Adoxaceae	Viburnum	Sect. Lentago	Viburnum prunifolium L.	PDB, GBIF	Viburnum sp.	0	0	0	0	1	1	0	1	1	0	0	0	0	0	0	0	0	0	0	0	0	0	0	0	0	0
Dipsacales: Adoxaceae	Viburnum	Sect. Lentago	Viburnum rufidulum Raf.	PDB, GBIF	Viburnum sp.	0	0	0	0	1	0	0	0	0	0	0	0	0	0	0	0	0	0	0	0	0	0	0	1	0	0
Dipsacales: Adoxaceae	Viburnum	Sect. Lobata	Viburnum acerifolium L.	Donoghue et al. 2005, GBIF, PDB	Viburnum sp.	0	0	0	0	1	1	0	1	1	1	0	0	0	0	0	0	0	0	0	0	0	0	0	0	0	0
Dipsacales: Adoxaceae	Viburnum	Sect. Lobata	Viburnum kansuense Batalin	FOC, Fang et al. 2011, GBIF, Clement & Donoghue 2012	Viburnum sp.	0	0	0	0	0	0	0	0	0	0	0	1	1	0	1	1	0	0	0	0	0	0	0	0	0	0
Dipsacales: Adoxaceae	Viburnum	Sect. Lobata	Viburnum orientale Pall.	GBIF, Clement & Donoghue 2012	Viburnum sp.	0	0	0	0	1	1	0	0	1	1	0	0	0	0	0	0	0	0	0	0	0	0	0	0	0	0	too few geo-referenced points
Dipsacales: Adoxaceae	Viburnum	Sect. Lutescentia	Viburnum amplifolium Rehder in Sarg.	FOC, Fang et al. 2011, GBIF, Clement & Donoghue 2012	Viburnum sp.	0	0	0	0	0	0	0	0	0	0	0	1	1	0	0	0	0	0	0	0	0	0	0	0	0	0
Dipsacales: Adoxaceae	Viburnum	Sect. Lutescentia	Viburnum colebrookeanum Wall. (V. lutescens Blume)	FOC, Fang et al. 2011, GBIF, Clement & Donoghue 2012	Viburnum sp.	0	1	0	1	1	0	0	0	0	0	0	1	1	0	0	0	0	0	0	0	0	0	0	0	0	0
Dipsacales: Adoxaceae	Viburnum	Sect. Lutescentia	Viburnum hanceanum Maxim.	FOC, Fang et al. 2011, GBIF	Viburnum sp.	0	0	0	0	1	1	0	0	0	0	0	1	0	0	0	0	0	0	0	0	0	0	0	0	0	0
Dipsacales: Adoxaceae	Viburnum	Sect. Lutescentia	Viburnum pyramidatum Rehder	FOC, Fang et al. 2011, GBIF, Clement & Donoghue 2012	Viburnum sp.	0	0	0	0	1	0	0	0	0	0	0	1	0	0	0	0	0	0	0	0	0	0	0	0	0	0
Dipsacales: Adoxaceae	Viburnum	Sect. Mollodontotinus	Viburnum australe Morton	GBIF, PDB	Viburnum sp.	0	0	0	0	1	0	0	0	0	0	0	0	0	0	0	0	0	0	0	0	0	0	1	1	1	0
Dipsacales: Adoxaceae	Viburnum	Sect. Mollodontotinus	Viburnum bracteatum Rehder	GBIF, PDB	Viburnum sp.	0	0	0	0	1	0	0	0	0	0	0	0	0	0	0	0	0	0	0	0	0	0	0	0	0	0
Dipsacales: Adoxaceae	Viburnum	Sect. Mollodontotinus	Viburnum ellipticum Hook.	PDB, GBIF	Viburnum sp.	0	0	0	0	0	0	0	0	0	0	0	0	0	0	0	0	0	0	1	0	0	0	0	0	0	0
Dipsacales: Adoxaceae	Viburnum	Sect. Mollodontotinus	Viburnum molle Michx.	PDB, GBIF	Viburnum sp.	0	0	0	0	1	0	0	0	0	0	0	0	0	0	0	0	0	0	0	0	0	0	0	0	0	0
Dipsacales: Adoxaceae	Viburnum	Sect. Mollodontotinus	Viburnum rafinesquianum Schult.	PDB, GBIF	Viburnum sp.	0	0	0	0	0	0	0	0	0	0	0	0	0	0	0	0	0	0	0	0	0	0	0	0	0	0
Dipsacales: Adoxaceae	Viburnum	Sect. Opulus	Viburnum edule (Michx.) Raf.	PDB, Clement & Donoghue 2012	Viburnum sp.	0	0	0	0	1	1	0	0	1	1	0	0	0	0	0	0	1	0	1	0	0	1	0	0	0	0
Dipsacales: Adoxaceae	Viburnum	Sect. Opulus	Viburnum koreanum Nakai	FOC, Fang et al. 2011, GBIF, Clement & Donoghue 2012	Viburnum sp.	0	0	0	0	0	0	0	0	0	0	0	0	0	0	1	1	0	0	0	0	0	0	0	0	0	0
Dipsacales: Adoxaceae	Viburnum	Sect. Opulus	Viburnum opulus L.	DVF, FOC, Fang et al. 2011, GBIF, Clement & Donoghue 2012	Viburnum sp.	0	0	0	0	1	1	1	0	1	1	0	1	1	1	1	1	0	1	1	0	1	1	0	1	0	0
Dipsacales: Adoxaceae	Viburnum	Sect. Opulus	Viburnum sargentii Koehne	FOJ, GBIF, Clement & Donoghue 2012	Viburnum sp.	0	0	0	0	1	0	0	0	1	0	0	1	0	1	1	0	0	0	0	0	0	0	0	0	0	0
Dipsacales: Adoxaceae	Viburnum	Sect. Opulus	Viburnum trilobum Marsh.	GBIF, Clement & Donoghue 2012	Viburnum sp.	0	0	0	0	1	0	0	1	1	0	0	0	0	0	0	0	0	0	0	0	0	0	0	0	0	0
Dipsacales: Adoxaceae	Viburnum	Sect. Oreinodontotinus	Viburnum acutifolium Bentham	GBIF, Clement & Donoghue 2012	Viburnum sp.	0	0	0	1	0	1	0	0	0	0	0	1	1	0	0	0	0	0	0	0	0	0	0	0	0	0
Dipsacales: Adoxaceae	Viburnum	Sect. Oreinodontotinus	Viburnum caudatum Greenm.	GBIF, Clement & Donoghue 2012	Viburnum sp.	0	0	0	0	1	1	0	0	0	0	0	1	1	0	0	0	0	0	0	0	0	0	0	0	0	0
Dipsacales: Adoxaceae	Viburnum	Sect. Oreinodontotinus	Viburnum ciliatum Greenm.	GBIF, Clement & Donoghue 2012	Viburnum sp.	0	0	0	1	1	1	0	0	0	0	0	1	1	0	0	0	0	0	0	0	0	0	0	0	0	0
Dipsacales: Adoxaceae	Viburnum	Sect. Oreinodontotinus	Viburnum dentatum L.	FNA, GBIF, PDB	Viburnum sp.	0	0	0	0	1	1	0	1	1	1	0	0	0	0	0	0	0	0	0	0	0	0	0	0	0	0
Dipsacales: Adoxaceae	Viburnum	Sect. Oreinodontotinus	Viburnum toronis Killip & A.C.Sm.	GBIF, Clement & Donoghue 2012	Viburnum sp.	1	0	0	0	1	1	0	0	0	0	0	0	0	0	0	0	0	0	0	0	0	0	0	0	0	0
Dipsacales: Adoxaceae	Viburnum	Sect. Pseudotinus	Viburnum furcatum Blume ex Hook.f. & Thomson	FOJ, GBIF, Clement & Donoghue 2012	Viburnum sp.	0	0	0	0	1	1	0	0	1	0	0	0	0	0	0	0	0	0	0	0	0	0	0	0	0	0
Dipsacales: Adoxaceae	Viburnum	Sect. Pseudotinus	Viburnum lantanoides Michx.	PDB, Clement & Donoghue 2012	Viburnum sp.	0	0	0	0	1	1	0	0	1	0	0	0	0	0	0	0	0	0	0	0	0	0	0	0	0	0
Dipsacales: Adoxaceae	Viburnum	Sect. Pseudotinus	Viburnum nervosum D. Don	FOC, Fang et al. 2011, GBIF, Clement & Donoghue 2012	Viburnum sp.	0	0	0	0	1	1	0	0	0	0	0	1	1	0	1	1	1	0	0	0	0	0	0	0	0	0
Dipsacales: Adoxaceae	Viburnum	Sect. Pseudotinus	Viburnum sympodiale Graebn.	FOC, GBIF, Clement & Donoghue 2012	Viburnum sp.	0	0	0	0	1	1	0	0	0	0	0	1	1	0	0	0	0	0	0	0	0	0	0	0	0	0
Dipsacales: Adoxaceae	Viburnum	Sect. Punctata	Viburnum punctatum Buch.-Ham. ex D. Don	FOC, Fang et al. 2011, GBIF, Clement & Donoghue 2012	Viburnum sp.	0	1	0	1	1	0	0	0	0	0	0	1	1	0	0	0	0	0	0	0	0	0	0	0	0	0
Dipsacales: Adoxaceae	Viburnum	Sect. Sambucina	Viburnum hispidulum J.Kern	GBIF, Clement & Donoghue 2012	Viburnum sp.	1	0	0	0	0	0	0	0	0	0	0	0	0	0	0	0	0	0	0	0	0	0	0	0	0	0	too few geo-referenced points
Dipsacales: Adoxaceae	Viburnum	Sect. Sambucina	Viburnum inopinatum Craib	FOC, Fang et al. 2011, GBIF, Clement & Donoghue 2012	Viburnum sp.	0	0	0	1	0	0	0	0	0	0	0	1	1	0	0	0	0	0	0	0	0	0	0	0	0	0
Dipsacales: Adoxaceae	Viburnum	Sect. Sambucina	Viburnum ternatum Rehder	FOC, Fang et al. 2011, GBIF, Clement & Donoghue 2012	Viburnum sp.	0	0	0	0	1	1	0	0	0	0	0	1	1	0	0	0	0	0	0	0	0	0	0	0	0	0
Dipsacales: Adoxaceae	Viburnum	Sect. Sambucina	Viburnum vernicosum Gibbs	GBIF, Clement & Donoghue 2012	Viburnum sp.	1	0	0	0	0	0	0	0	0	0	0	0	0	0	0	0	0	0	0	0	0	0	0	0	0	0	too few geo-referenced points
Dipsacales: Adoxaceae	Viburnum	Sect. Solenotinus	Viburnum amplificatum J.Kern	GBIF, Clement & Donoghue 2012	Viburnum sp.	1	0	0	0	0	0	0	0	0	0	0	0	0	0	0	0	0	0	0	0	0	0	0	0	0	0
Dipsacales: Adoxaceae	Viburnum	Sect. Solenotinus	Viburnum brachybotryum Hemsley	FOC, Fang et al. 2011, GBIF	Viburnum sp.	0	0	0	0	1	1	0	0	0	0	0	1	1	0	0	0	0	0	0	0	0	0	0	0	0	0
Dipsacales: Adoxaceae	Viburnum	Sect. Solenotinus	Viburnum brevitubum (P.S.Hsu) P.S.Hsu	FOC, Fang et al. 2011, GBIF	Viburnum sp.	0	0	0	0	1	1	0	0	0	0	0	1	1	0	0	0	0	0	0	0	0	0	0	0	0	0
Dipsacales: Adoxaceae	Viburnum	Sect. Solenotinus	Viburnum chingii P.S.Hsu	FOC, Fang et al. 2011, GBIF, Clement & Donoghue 2012	Viburnum sp.	0	0	0	0	0	0	0	0	0	0	0	1	1	0	0	0	0	0	0	0	0	0	0	0	0	0
Dipsacales: Adoxaceae	Viburnum	Sect. Solenotinus	Viburnum corymbiflorum P.S.Hsu & S.C.Hsu	FOC, Fang et al. 2011, GBIF, Clement & Donoghue 2012	Viburnum sp.	0	0	0	0	1	1	0	0	0	0	0	1	1	0	0	0	0	0	0	0	0	0	0	0	0	0
Dipsacales: Adoxaceae	Viburnum	Sect. Solenotinus	Viburnum erubescens Wall. ex D. Candolle	FOC, Fang et al. 2011, GBIF, Clement & Donoghue 2012	Viburnum sp.	0	0	0	0	1	1	0	0	0	0	0	1	1	0	1	1	0	0	0	0	0	0	0	0	0	0
Dipsacales: Adoxaceae	Viburnum	Sect. Solenotinus	Viburnum farreri W.T. Stearn	FOC, Fang et al. 2011, GBIF, Clement & Donoghue 2012	Viburnum sp.	0	0	0	0	1	0	0	1	1	1	0	1	1	0	0	0	0	0	0	0	0	0	0	1	0	1
Dipsacales: Adoxaceae	Viburnum	Sect. Solenotinus	Viburnum grandiflorum Wall. Ex DC.	FOC, FOP, Fang et al. 2011, GBIF	Viburnum sp.	0	0	0	0	1	1	0	0	0	0	0	1	1	0	1	1	1	0	0	0	0	0	0	0	0	0
Dipsacales: Adoxaceae	Viburnum	Sect. Solenotinus	Viburnum henryi Hemsl.	FOC, Fang et al. 2011, GBIF	Viburnum sp.	0	0	0	0	1	1	0	0	0	0	0	1	1	0	0	0	0	0	0	0	0	0	0	0	0	0
Dipsacales: Adoxaceae	Viburnum	Sect. Solenotinus	Viburnum junghuhnii Miq.	GBIF, Clement & Donoghue 2012	Viburnum sp.	1	0	0	0	0	0	0	0	0	0	0	0	0	0	0	0	0	0	0	0	0	0	0	0	0	0	too few geo-referenced points
Dipsacales: Adoxaceae	Viburnum	Sect. Solenotinus	Viburnum longipedunculatum (P.S.Hsu) P.S.Hsu	FOC, Fang et al. 2011, GBIF	Viburnum sp.	0	0	0	0	1	0	0	0	0	0	0	1	1	0	0	0	0	0	0	0	0	0	0	0	0	0
Dipsacales: Adoxaceae	Viburnum	Sect. Solenotinus	Viburnum odoratissimum Ker-Gawl.	FOC, Fang et al. 2011, GBIF, Clement & Donoghue 2012	Viburnum sp.	1	1	0	1	1	1	0	0	0	0	0	1	1	0	0	0	0	0	0	0	0	0	0	0	0	0
Dipsacales: Adoxaceae	Viburnum	Sect. Solenotinus	Viburnum oliganthum Batalin	FOC, Fang et al. 2011, GBIF, Clement & Donoghue 2012	Viburnum sp.	0	0	0	0	1	1	0	0	0	0	0	1	1	0	0	0	0	0	0	0	0	0	0	0	0	0
Dipsacales: Adoxaceae	Viburnum	Sect. Solenotinus	Viburnum sieboldii Miq.	FOJ, GBIF, Clement & Donoghue 2012	Viburnum sp.	0	0	0	0	1	0	0	0	0	0	0	0	0	0	0	0	0	0	0	0	0	0	0	0	0	0
Dipsacales: Adoxaceae	Viburnum	Sect. Solenotinus	Viburnum subalpinum Hand.-Mazz.	FOC, Fang et al. 2011, GBIF, Clement & Donoghue 2012	Viburnum sp.	0	0	0	0	0	0	0	0	0	0	0	0	1	0	0	0	0	0	0	0	0	0	0	0	0	0
Dipsacales: Adoxaceae	Viburnum	Sect. Solenotinus	Viburnum suspensum Lindl.	GBIF, Clement & Donoghue 2012	Viburnum sp.	0	0	0	0	0	0	0	0	0	0	0	0	0	0	0	0	0	0	0	0	0	0	0	0	0	0
Dipsacales: Adoxaceae	Viburnum	Sect. Solenotinus	Viburnum taitoense Hayata	FOC, Fang et al. 2011, GBIF, Clement & Donoghue 2012	Viburnum sp.	0	0	0	0	1	1	0	0	0	0	0	1	1	0	0	0	0	0	0	0	0	0	0	0	0	0
Dipsacales: Adoxaceae	Viburnum	Sect. Solenotinus	Viburnum tengyuehense (W.W.Smith) P.S.Hsu	FOC, Fang et al. 2011, GBIF	Viburnum sp.	0	0	0	0	0	0	0	0	0	0	0	1	1	0	0	0	0	0	0	0	0	0	0	0	0	0
Dipsacales: Adoxaceae	Viburnum	Sect. Solenotinus	Viburnum trabeculosum C.Z.Wu	FOC, Fang et al. 2011, GBIF	Viburnum sp.	0	0	0	0	0	0	0	0	0	0	0	1	1	0	0	0	0	0	0	0	0	0	0	0	0	0
Dipsacales: Adoxaceae	Viburnum	Sect. Solenotinus	Viburnum wardii W.W.Sm.	GBIF, Clement & Donoghue 2012	Viburnum sp.	0	0	0	0	0	0	0	0	0	0	0	0	0	0	0	0	0	0	0	0	0	0	0	0	0	0
Dipsacales: Adoxaceae	Viburnum	Sect. Solenotinus	Viburnum yunnanense Rehder in Sarg.	FOC, Fang et al. 2011, GBIF	Viburnum sp.	0	0	0	0	1	0	0	0	0	0	0	1	1	0	0	0	0	0	0	0	0	0	0	0	0	0
Dipsacales: Adoxaceae	Viburnum	Sect. Solenotinus	Viburum shweliense W.W.Smith	FOC, Fang et al. 2011, GBIF	Viburnum sp.	0	0	0	0	0	0	0	0	0	0	0	0	1	0	0	0	0	0	0	0	0	0	0	0	0	0
Dipsacales: Adoxaceae	Viburnum	Sect. Succodontotinus	Viburnum betulifolium Batalin	FOC, Fang et al. 2011, GBIF	Viburnum sp.	0	0	0	1	1	1	0	0	0	0	0	1	1	0	0	0	0	0	0	0	0	0	0	0	0	0
Dipsacales: Adoxaceae	Viburnum	Sect. Succodontotinus	Viburnum brachyandrum Nakai	FOJ, GBIF, Clement & Donoghue 2012	Viburnum sp.	0	0	0	0	1	0	0	0	0	0	0	0	0	0	0	0	0	0	0	0	0	0	0	0	0	0	too few geo-referenced points
Dipsacales: Adoxaceae	Viburnum	Sect. Succodontotinus	Viburnum chunii Hsu	FOC, Fang et al. 2011, GBIF	Viburnum sp.	0	0	0	0	1	0	0	0	0	0	0	1	0	0	0	0	0	0	0	0	0	0	0	0	0	0
Dipsacales: Adoxaceae	Viburnum	Sect. Succodontotinus	Viburnum corylifolium J.D.Hooker & Thomson	FOC, GBIF, Clement & Donoghue 2012	Viburnum sp.	0	0	0	0	1	0	0	0	0	0	0	1	0	0	0	0	0	0	0	0	0	0	0	0	0	0	too few geo-referenced points
Dipsacales: Adoxaceae	Viburnum	Sect. Succodontotinus	Viburnum dalzelii W.W.Smith	FOC, Fang et al. 2011, GBIF	Viburnum sp.	0	0	0	0	1	0	0	0	0	0	0	0	0	0	0	0	0	0	0	0	0	0	0	0	0	0
Dipsacales: Adoxaceae	Viburnum	Sect. Succodontotinus	Viburnum dilatatum Thunb.	FOC, Fang et al. 2011, GBIF, Clement & Donoghue 2012	Viburnum sp.	0	0	0	0	1	1	0	0	1	0	0	1	1	1	1	0	0	0	0	0	0	0	0	0	0	0
Dipsacales: Adoxaceae	Viburnum	Sect. Succodontotinus	Viburnum erosum Thunb.	FOC, Fang et al. 2011, GBIF, Clement & Donoghue 2012	Viburnum sp.	0	0	0	0	1	1	0	0	0	0	0	1	1	0	0	0	0	0	0	0	0	0	0	0	0	0
Dipsacales: Adoxaceae	Viburnum	Sect. Succodontotinus	Viburnum foetidum Wall.	FOC, Fang et al. 2011, GBIF, Clement & Donoghue 2012	Viburnum sp.	0	0	0	0	1	1	1	0	0	0	0	1	1	0	0	1	0	0	0	0	0	0	0	0	0	0
Dipsacales: Adoxaceae	Viburnum	Sect. Succodontotinus	Viburnum fordiae Hance	FOC, Fang et al. 2011, GBIF	Viburnum sp.	0	0	0	0	1	1	0	0	0	0	0	1	1	0	0	0	0	0	0	0	0	0	0	0	0	0
Dipsacales: Adoxaceae	Viburnum	Sect. Succodontotinus	Viburnum formosanum (Maxim.) Hayata	FOC, Fang et al. 2011, GBIF, Clement & Donoghue 2012	Viburnum sp.	0	0	0	0	1	1	1	0	0	0	0	1	1	0	0	0	0	0	0	0	0	0	0	0	0	0
Dipsacales: Adoxaceae	Viburnum	Sect. Succodontotinus	Viburnum hainanense Merrill & Chun	FOC, Fang et al. 2011, GBIF	Viburnum sp.	0	0	0	1	1	0	0	0	0	0	0	1	1	0	0	0	0	0	0	0	0	0	0	0	0	0
Dipsacales: Adoxaceae	Viburnum	Sect. Succodontotinus	Viburnum hengshanicum Tsiang ex P.S.Hsu	FOC, Fang et al. 2011, GBIF	Viburnum sp.	0	0	0	0	1	1	0	0	0	0	0	1	1	0	0	0	0	0	0	0	0	0	0	0	0	0
Dipsacales: Adoxaceae	Viburnum	Sect. Succodontotinus	Viburnum integrifolium Hayata	FOC, Fang et al. 2011, GBIF, Clement & Donoghue 2012	Viburnum sp.	0	0	0	0	1	1	0	0	0	0	0	1	1	0	0	0	0	0	0	0	0	0	0	0	0	0
Dipsacales: Adoxaceae	Viburnum	Sect. Succodontotinus	Viburnum japonicum (Thumb.) C.K. Spreng	FOJ, GBIF, Clement & Donoghue 2012	Viburnum sp.	0	0	0	0	1	0	0	0	0	0	0	0	0	0	0	0	0	0	0	0	0	0	0	0	0	0
Dipsacales: Adoxaceae	Viburnum	Sect. Succodontotinus	Viburnum lancifolium Hsu	FOC, Fang et al. 2011, GBIF, Clement & Donoghue 2012	Viburnum sp.	0	0	0	0	1	0	0	0	0	0	0	0	0	0	0	0	0	0	0	0	0	0	0	0	0	0
Dipsacales: Adoxaceae	Viburnum	Sect. Succodontotinus	Viburnum longiradiatum P.S.Hsu & S.W.Fan	FOC, Fang et al. 2011, GBIF	Viburnum sp.	0	0	0	0	0	0	0	0	0	0	0	1	1	0	0	0	0	0	0	0	0	0	0	0	0	0
Dipsacales: Adoxaceae	Viburnum	Sect. Succodontotinus	Viburnum luzonicum Rolfe	FOC, Fang et al. 2011, GBIF, Clement & Donoghue 2012	Viburnum sp.	1	1	0	1	1	1	0	0	0	0	0	1	1	0	0	0	0	0	0	0	0	0	0	0	0	0
Dipsacales: Adoxaceae	Viburnum	Sect. Succodontotinus	Viburnum melanocarpum P.S. Hsu	FOC, Fang et al. 2011, GBIF, Clement & Donoghue 2012	Viburnum sp.	0	0	0	0	1	1	0	0	0	0	0	0	0	0	0	0	0	0	0	0	0	0	0	0	0	0
Dipsacales: Adoxaceae	Viburnum	Sect. Succodontotinus	Viburnum mullaha Buch.-Ham. Ex D.Don	FOC, FOP, Fang et al. 2011, GBIF	Viburnum sp.	0	0	0	0	1	1	0	0	0	0	0	1	1	0	1	1	1	0	0	0	0	0	0	0	0	0
Dipsacales: Adoxaceae	Viburnum	Sect. Succodontotinus	Viburnum phlebotrichum Sieb. Zucc.	FOJ, GBIF, Clement & Donoghue 2012	Viburnum sp.	0	0	0	0	1	1	0	0	1	0	0	0	0	0	0	0	0	0	0	0	0	0	0	0	0	0
Dipsacales: Adoxaceae	Viburnum	Sect. Succodontotinus	Viburnum sempervirens K. Koch	FOC, Fang et al. 2011, GBIF, Clement & Donoghue 2012	Viburnum sp.	0	1	0	1	1	1	0	0	0	0	0	1	1	0	0	0	0	0	0	0	0	0	0	0	0	0
Dipsacales: Adoxaceae	Viburnum	Sect. Succodontotinus	Viburnum setigerum Hance	FOC, Fang et al. 2011, GBIF	Viburnum sp.	0	0	0	0	1	1	0	0	0	0	0	1	1	0	0	0	0	0	0	0	0	0	0	0	0	0
Dipsacales: Adoxaceae	Viburnum	Sect. Succodontotinus	Viburnum wrightii Miq.	FOJ, GBIF, Clement & Donoghue 2012	Viburnum sp.	0	0	0	0	1	1	0	0	1	0	0	1	0	1	1	0	0	0	0	0	0	0	0	0	0	0
Dipsacales: Adoxaceae	Viburnum	Sect. Tinus	Viburnum atrocyaneum C.B.Clarke	FOC, Fang et al. 2011, GBIF	Viburnum sp.	0	0	0	0	0	0	0	0	0	0	0	1	1	0	0	0	0	0	0	0	0	0	0	0	0	0
Dipsacales: Adoxaceae	Viburnum	Sect. Tinus	Viburnum cinnamomifolium Rehder in Sarg.	FOC, Fang et al. 2011, GBIF, Clement & Donoghue 2012	Viburnum sp.	0	0	0	0	1	0	0	0	0	0	0	1	1	0	0	0	0	0	0	0	0	0	0	0	0	0
Dipsacales: Adoxaceae	Viburnum	Sect. Tinus	Viburnum davidii Franch.	FOC, Fang et al. 2011, GBIF, Clement & Donoghue 2012	Viburnum sp.	0	0	0	0	0	0	0	0	0	0	0	1	0	0	0	0	0	0	0	0	0	0	0	0	0	0
Dipsacales: Adoxaceae	Viburnum	Sect. Tinus	Viburnum propinquum Hemsl	FOC, Fang et al. 2011, GBIF, Clement & Donoghue 2012	Viburnum sp.	0	0	0	0	1	1	0	0	0	0	0	1	1	0	0	0	0	0	0	0	0	0	0	0	0	0
Dipsacales: Adoxaceae	Viburnum	Sect. Tinus	Viburnum rigidum Vent.	GBIF, Clement & Donoghue 2012	Viburnum sp.	0	0	0	0	0	0	0	0	0	0	0	0	1	0	0	0	0	1	1	0	0	0	1	1	0	0
Dipsacales: Adoxaceae	Viburnum	Sect. Tinus	Viburnum tinus L.	GBIF, Clement & Donoghue 2012	Viburnum sp.	0	0	0	0	0	0	0	0	0	0	0	0	0	0	0	0	0	1	1	0	0	0	0	1	0	0
Dipsacales: Adoxaceae	Viburnum	Sect. Tinus	Viburnum triplinerve Hand.-Mazz.	FOC, Fang et al. 2011, GBIF	Viburnum sp.	0	0	0	0	1	0	0	0	0	0	0	1	0	0	0	0	0	0	0	0	0	0	0	0	0	0
Dipsacales: Adoxaceae	Viburnum	Sect. Tometosa	Viburnum plicatum Thunberg	FOC, Fang et al. 2011, GBIF, Clement & Donoghue 2012	Viburnum sp.	0	0	0	0	1	1	0	0	1	0	0	1	1	0	0	0	0	0	0	0	0	0	0	0	0	0
Dipsacales: Adoxaceae	Viburnum		Viburnum alabamense (McAtee) Sorrie	GBIF, PDB	Viburnum sp.	0	0	0	0	1	0	0	0	0	0	0	0	0	0	0	0	0	0	0	0	0	0	0	0	0	0
Dipsacales: Adoxaceae	Viburnum		Viburnum leiocarpum P.S.Hsu	FOC, Fang et al. 2011, GBIF	Viburnum sp.	0	0	0	1	0	0	0	0	0	0	0	1	1	0	0	0	0	0	0	0	0	0	0	0	0	0
Dipsacales: Adoxaceae	Viburnum		Viburnum recognitum Fernald	PDB, GBIF	Viburnum sp.	0	0	0	0	1	1	0	1	1	0	0	0	0	0	0	0	0	0	0	0	0	0	0	0	0	0
Dipsacales: Adoxaceae	Viburnum		Viburnum urceolatum Siebold & Zucc	FOC, Fang et al. 2011, GBIF, Clement & Donoghue 2012	Viburnum sp.	0	0	0	0	1	1	0	0	1	0	0	1	1	0	0	0	0	0	0	0	0	0	0	0	0	0
Dipsacales: Caprifoliaceae: Caprifolieae	Lonicera		Lonicera acuminata Wall. In Roxb	FOC, Fang et al. 2011, GBIF	Lonicera sp.	0	1	0	1	1	1	0	0	0	0	0	1	1	0	0	0	0	0	0	0	0	0	0	0	0	0
Dipsacales: Caprifoliaceae: Caprifolieae	Lonicera		Lonicera albiflora Torr. & A.Gray	GBIF, PDB	Lonicera sp.	0	0	0	0	1	0	0	0	0	0	0	0	0	0	0	0	0	0	0	0	0	0	1	1	1	0
Dipsacales: Caprifoliaceae: Caprifolieae	Lonicera		Lonicera alpigenia Siev.	GBIF, PDB	Lonicera sp.	0	0	0	0	1	1	0	0	1	0	0	0	0	0	0	0	0	0	0	0	0	0	0	0	0	0
Dipsacales: Caprifoliaceae: Caprifolieae	Lonicera		Lonicera altmannii Regel & Schmalh.	Fang et al. 2011, GBIF	Lonicera sp.	0	0	0	0	0	0	0	1	1	0	0	0	0	0	0	0	1	0	0	0	0	0	0	1	0	1	too few geo-referenced points
Dipsacales: Caprifoliaceae: Caprifolieae	Lonicera		Lonicera angustifolia Wall. Ex DC.	FOC, Fang et al. 2011, GBIF, FOP	Lonicera sp.	0	0	0	0	0	0	0	0	0	0	0	1	1	0	1	1	1	0	0	0	0	0	0	0	0	0
Dipsacales: Caprifoliaceae: Caprifolieae	Lonicera		Lonicera arborea Boiss.	GBIF, FOI	Lonicera sp.	0	0	0	0	0	0	0	0	0	0	0	0	0	0	0	0	0	1	0	0	0	0	0	0	0	0
Dipsacales: Caprifoliaceae: Caprifolieae	Lonicera		Lonicera arizonica Rehder	GBIF, PDB	Lonicera sp.	0	0	0	0	0	0	0	0	0	0	0	1	1	0	0	0	0	0	0	0	0	0	1	1	0	0
Dipsacales: Caprifoliaceae: Caprifolieae	Lonicera		Lonicera asperifolia Hook f. & Thomson	GBIF, FOP	Lonicera sp.	0	0	0	0	1	1	0	0	1	1	0	0	0	0	0	0	1	0	0	0	1	1	0	0	0	0
Dipsacales: Caprifoliaceae: Caprifolieae	Lonicera		Lonicera bournei Hemsl.	FOC, Fang et al. 2011, GBIF	Lonicera sp.	0	0	0	0	1	0	0	0	0	0	0	1	1	0	0	0	0	0	0	0	0	0	0	0	0	0
Dipsacales: Caprifoliaceae: Caprifolieae	Lonicera		Lonicera caerulea L.	FOC, Fang et al. 2011, GBIF, PDB, Virtuella floran	Lonicera sp.	0	0	0	0	1	1	0	0	1	1	0	1	1	1	1	1	0	1	1	0	1	1	0	1	0	1
Dipsacales: Caprifoliaceae: Caprifolieae	Lonicera		Lonicera calcerata Hemsl.	FOC, Fang et al. 2011, GBIF	Lonicera sp.	0	0	0	0	1	1	0	0	0	0	0	1	1	0	0	0	0	0	0	0	0	0	0	0	0	0
Dipsacales: Caprifoliaceae: Caprifolieae	Lonicera		Lonicera canadensis W.Bartram ex Marshall	GBIF, PDB	Lonicera sp.	0	0	0	0	1	1	0	1	1	0	0	0	0	0	0	0	0	0	0	0	0	0	0	0	0	0
Dipsacales: Caprifoliaceae: Caprifolieae	Lonicera		Lonicera caucasica Pall.	GBIF, FOP	Lonicera sp.	0	0	0	0	1	1	0	0	1	1	0	1	1	0	0	0	0	0	0	0	0	0	0	0	0	0
Dipsacales: Caprifoliaceae: Caprifolieae	Lonicera		Lonicera chrysantha Turczan.	FOC, GBIF	Lonicera sp.	0	0	0	0	1	0	0	0	0	1	0	1	1	1	1	1	0	0	0	0	0	0	0	0	0	0
Dipsacales: Caprifoliaceae: Caprifolieae	Lonicera		Lonicera ciliosa (Pursh) Poir. Ex. DC.	GBIF, PDB	Lonicera sp.	0	0	0	0	0	1	0	0	1	1	0	0	0	0	0	0	0	0	1	0	0	1	0	0	0	0
Dipsacales: Caprifoliaceae: Caprifolieae	Lonicera		Lonicera confusa DC.	FOC, Fang et al. 2011, GBIF	Lonicera sp.	0	0	0	1	1	1	0	0	0	0	0	1	1	0	0	0	0	0	0	0	0	0	0	0	0	0
Dipsacales: Caprifoliaceae: Caprifolieae	Lonicera		Lonicera conjugialis Kellogg	GBIF, PDB	Lonicera sp.	0	0	0	0	0	0	0	0	0	0	0	0	0	0	0	0	0	0	1	0	0	0	0	0	0	0
Dipsacales: Caprifoliaceae: Caprifolieae	Lonicera		Lonicera crassifolia Batalin	FOC, Fang et al. 2011, GBIF	Lonicera sp.	0	0	0	0	1	1	0	0	0	0	0	1	1	0	0	0	0	0	0	0	0	0	0	0	0	0
Dipsacales: Caprifoliaceae: Caprifolieae	Lonicera		Lonicera cyanocarpa Franch.	FOC, Fang et al. 2011, GBIF	Lonicera sp.	0	0	0	0	0	0	0	0	0	0	0	0	1	0	1	1	1	0	0	0	0	0	0	0	0	0
Dipsacales: Caprifoliaceae: Caprifolieae	Lonicera		Lonicera demissa Rehder	GBIF, FOJ	Lonicera sp.	0	0	0	0	1	1	0	0	1	0	0	0	0	0	0	0	0	0	0	0	0	0	0	0	0	0
Dipsacales: Caprifoliaceae: Caprifolieae	Lonicera		Lonicera dioica L.	GBIF, PDB	Lonicera sp.	0	0	0	0	1	0	0	1	1	1	0	0	0	0	0	0	0	0	0	0	0	0	0	0	0	0
Dipsacales: Caprifoliaceae: Caprifolieae	Lonicera		Lonicera elisae Franch.	FOC, Fang et al. 2011, GBIF	Lonicera sp.	0	0	0	0	1	0	0	0	0	0	0	1	1	1	1	0	0	0	0	0	0	0	0	0	0	0
Dipsacales: Caprifoliaceae: Caprifolieae	Lonicera		Lonicera etrusca Santi	GBIF, Browicz 1983 (3)	Lonicera sp.	0	0	0	0	1	1	0	0	0	0	0	0	0	0	0	0	0	1	1	0	0	0	0	1	0	0
Dipsacales: Caprifoliaceae: Caprifolieae	Lonicera		Lonicera fargesii Franch.	FOC, Fang et al. 2011, GBIF	Lonicera sp.	0	0	0	0	0	0	0	0	0	0	0	1	1	1	1	0	0	0	0	0	0	0	0	0	0	0
Dipsacales: Caprifoliaceae: Caprifolieae	Lonicera		Lonicera ferdinandi Franch.	FOC, Fang et al. 2011, GBIF	Lonicera sp.	0	0	0	0	0	0	0	0	0	0	0	1	1	1	1	0	0	0	0	0	0	0	0	0	0	0
Dipsacales: Caprifoliaceae: Caprifolieae	Lonicera		Lonicera ferruginea Rehder	FOC, Fang et al. 2011, GBIF	Lonicera sp.	0	0	0	0	1	0	0	0	0	0	0	1	1	0	0	0	0	0	0	0	0	0	0	0	0	0
Dipsacales: Caprifoliaceae: Caprifolieae	Lonicera		Lonicera flava Sims	GBIF, PDB	Lonicera sp.	0	0	0	0	1	0	0	0	0	0	0	0	0	0	0	0	0	0	0	0	0	0	0	0	0	0
Dipsacales: Caprifoliaceae: Caprifolieae	Lonicera		Lonicera floribunda Boiss. & Buhse	GBIF	Lonicera sp.	0	0	0	0	0	0	0	1	1	0	0	0	0	0	0	0	0	0	0	0	0	0	0	0	0	0
Dipsacales: Caprifoliaceae: Caprifolieae	Lonicera		Lonicera fragrantissima Lindl. & Paxton	FOC, Fang et al. 2011, GBIF	Lonicera sp.	0	0	0	0	1	0	0	0	0	0	0	1	1	0	1	1	0	0	0	0	0	0	0	1	0	0
Dipsacales: Caprifoliaceae: Caprifolieae	Lonicera		Lonicera gracilipes Miq.	GBIF, FOJ	Lonicera sp.	0	0	0	0	1	1	0	0	1	0	0	0	0	0	0	0	0	0	0	0	0	0	0	0	0	0
Dipsacales: Caprifoliaceae: Caprifolieae	Lonicera		Lonicera griffithii Hook. F. & Thoms.	GBIF, FOP	Lonicera sp.	0	0	0	0	1	1	0	0	1	1	0	0	0	0	0	0	0	0	0	0	1	1	0	0	0	0
Dipsacales: Caprifoliaceae: Caprifolieae	Lonicera		Lonicera gynochlamydea Hemsl.	FOC, Fang et al. 2011, GBIF	Lonicera sp.	0	0	0	0	1	1	0	0	0	0	0	1	1	0	0	0	0	0	0	0	0	0	0	0	0	0
Dipsacales: Caprifoliaceae: Caprifolieae	Lonicera		Lonicera heteroophylla Decne,	GBIF, FOP	Lonicera sp.	0	0	0	0	0	1	0	0	1	1	0	0	0	0	0	0	1	0	0	0	0	0	0	0	0	0
Dipsacales: Caprifoliaceae: Caprifolieae	Lonicera		Lonicera hildebrandiana Colett & Hemsl.	FOC, Fang et al. 2011, GBIF	Lonicera sp.	0	0	0	0	0	0	0	0	0	0	0	1	1	0	0	0	0	0	0	0	0	0	0	0	0	0
Dipsacales: Caprifoliaceae: Caprifolieae	Lonicera		Lonicera hirsuta Eaton	GBIF, PDB	Lonicera sp.	0	0	0	0	0	0	0	1	1	0	0	0	0	0	0	0	0	0	0	0	0	0	0	0	0	0
Dipsacales: Caprifoliaceae: Caprifolieae	Lonicera		Lonicera hispida Pall. & Schuilt.	FNAmerica	Lonicera sp.	0	0	0	0	1	1	0	0	0	0	0	1	1	1	1	1	1	0	0	0	0	0	0	1	0	1
Dipsacales: Caprifoliaceae: Caprifolieae	Lonicera		Lonicera hispidula (Lindl.) Douglas ex Torr. & A.Gray	GBIF, PDB	Lonicera sp.	0	0	0	0	0	1	0	0	0	0	0	0	0	0	0	0	0	0	1	0	0	0	0	0	0	0
Dipsacales: Caprifoliaceae: Caprifolieae	Lonicera		Lonicera humilis Karelin & Kirilov	FOC, Fang et al. 2011, GBIF	Lonicera sp.	0	0	0	0	0	0	0	1	1	1	0	0	0	0	0	0	0	0	0	0	0	0	0	1	0	0
Dipsacales: Caprifoliaceae: Caprifolieae	Lonicera		Lonicera hypoglauca Miq.	FOC, Fang et al. 2011, GBIF	Lonicera sp.	0	0	0	1	1	1	0	0	0	0	0	1	1	0	0	0	0	0	0	0	0	0	0	0	0	0
Dipsacales: Caprifoliaceae: Caprifolieae	Lonicera		Lonicera hypoleuca Decne.	FOC, Fang et al. 2011, GBIF, FOP	Lonicera sp.	0	0	0	0	1	1	0	1	1	0	0	0	1	0	1	1	0	0	0	0	0	0	0	1	0	0
Dipsacales: Caprifoliaceae: Caprifolieae	Lonicera		Lonicera implexa Aiton	GBIF, Browicz 1983 (3)	Lonicera sp.	0	0	0	0	1	1	0	0	0	0	0	0	0	0	0	0	0	1	1	0	0	0	0	1	0	0
Dipsacales: Caprifoliaceae: Caprifolieae	Lonicera		Lonicera interrupta Benth.	GBIF, PDB	Lonicera sp.	0	0	0	0	0	0	0	0	0	0	0	0	0	0	0	0	0	0	1	0	0	0	0	0	0	0
Dipsacales: Caprifoliaceae: Caprifolieae	Lonicera		Lonicera involucrata Banks ex Spreng.	GBIF, PDB	Lonicera sp.	0	0	0	0	0	1	0	0	1	1	0	0	0	0	0	0	1	1	1	0	1	1	0	0	0	0
Dipsacales: Caprifoliaceae: Caprifolieae	Lonicera		Lonicera japonica Thunb.	FOC, Fang et al. 2011, GBIF, FOJ	Lonicera sp.	0	0	0	0	1	1	0	0	1	0	0	1	1	1	1	0	0	0	0	0	0	0	0	0	0	0
Dipsacales: Caprifoliaceae: Caprifolieae	Lonicera		Lonicera kansuensis (Batalin) Pojark.	FOC, Fang et al. 2011, GBIF	Lonicera sp.	0	0	0	0	0	0	0	0	0	0	0	1	1	1	1	0	0	0	0	0	0	0	0	1	0	0
Dipsacales: Caprifoliaceae: Caprifolieae	Lonicera		Lonicera kawakamii (Hayata) Masam.	FOC, Fang et al. 2011, GBIF	Lonicera sp.	0	0	0	0	1	1	0	0	0	0	0	0	0	0	0	0	0	0	0	0	0	0	0	0	0	0
Dipsacales: Caprifoliaceae: Caprifolieae	Lonicera		Lonicera korolkovii Stapf.	GBIF, FOP	Lonicera sp.	0	0	0	0	1	1	0	0	1	1	0	0	0	0	0	0	0	0	0	0	0	0	0	0	0	0
Dipsacales: Caprifoliaceae: Caprifolieae	Lonicera		Lonicera lanceolata Wall.	Fang et al. 2011, GBIF	Lonicera sp.	0	0	0	0	1	0	0	0	0	0	0	1	1	0	1	1	1	0	0	0	0	0	0	0	0	0
Dipsacales: Caprifoliaceae: Caprifolieae	Lonicera		Lonicera ligustrina Wall.	FOC, Fang et al. 2011, GBIF	Lonicera sp.	0	0	0	0	1	1	0	0	0	0	0	1	1	0	0	0	0	0	0	0	0	0	0	0	0	0
Dipsacales: Caprifoliaceae: Caprifolieae	Lonicera		Lonicera litagensis Batalin.	FOC, Fang et al. 2011, GBIF	Lonicera sp.	0	0	0	0	0	0	0	0	0	0	0	0	1	0	1	1	1	0	0	0	0	0	0	0	0	0
Dipsacales: Caprifoliaceae: Caprifolieae	Lonicera		Lonicera longiflora (Lindl.) DC.	FOC, Fang et al. 2011, GBIF	Lonicera sp.	0	0	0	1	1	0	0	0	0	0	0	1	0	0	0	0	0	0	0	0	0	0	0	0	0	0
Dipsacales: Caprifoliaceae: Caprifolieae	Lonicera		Lonicera longituba H.T.Chang ex P.S.Hsu & H.J.Wang	FOC, Fang et al. 2011, GBIF	Lonicera sp.	0	0	0	0	0	0	0	0	0	0	0	1	0	0	0	0	0	0	0	0	0	0	0	0	0	0
Dipsacales: Caprifoliaceae: Caprifolieae	Lonicera		Lonicera maackii (Rupr.) Maxim.	FOC, Fang et al. 2011, GBIF	Lonicera sp.	0	0	0	0	1	1	0	0	0	0	0	1	1	1	1	1	0	0	0	0	0	0	0	1	0	0
Dipsacales: Caprifoliaceae: Caprifolieae	Lonicera		Lonicera macrantha (D.Don) Spreng.	FOC, Fang et al. 2011, GBIF	Lonicera sp.	0	0	0	1	1	1	0	0	0	0	0	1	1	0	0	0	0	0	0	0	0	0	0	0	0	0
Dipsacales: Caprifoliaceae: Caprifolieae	Lonicera		Lonicera macranthoides Hand.-Mazz.	FOC, Fang et al. 2011, GBIF	Lonicera sp.	0	0	0	0	1	1	0	0	0	0	0	1	1	0	0	0	0	0	0	0	0	0	0	0	0	0
Dipsacales: Caprifoliaceae: Caprifolieae	Lonicera		Lonicera maximowiczii (Rupr.) Regel	FOC, Fang et al. 2011, GBIF	Lonicera sp.	0	0	0	0	0	0	0	0	0	0	0	1	0	1	1	1	0	0	0	0	0	0	0	0	0	0
Dipsacales: Caprifoliaceae: Caprifolieae	Lonicera		Lonicera mexicana Rehder	GBIF	Lonicera sp.	0	0	0	0	1	1	0	0	0	0	0	1	1	0	0	0	0	0	0	0	0	0	0	0	0	0
Dipsacales: Caprifoliaceae: Caprifolieae	Lonicera		Lonicera microphylla Willd. Ex Schult.	FOC, Fang et al. 2011, GBIF, FOP	Lonicera sp.	0	0	0	0	0	0	0	0	1	1	0	1	1	1	1	1	1	0	0	0	0	0	0	1	0	1
Dipsacales: Caprifoliaceae: Caprifolieae	Lonicera		Lonicera modesta Rehder in Sarg.	FOC, Fang et al. 2011, GBIF	Lonicera sp.	0	0	0	0	1	0	0	0	0	0	0	1	0	0	0	0	0	0	0	0	0	0	0	0	0	0
Dipsacales: Caprifoliaceae: Caprifolieae	Lonicera		Lonicera morrowii A.Gray	GBIF, FOJ	Lonicera sp.	0	0	0	0	1	1	0	0	1	0	0	0	0	0	0	0	0	0	0	0	0	0	0	0	0	0
Dipsacales: Caprifoliaceae: Caprifolieae	Lonicera		Lonicera mucronata Rehder	FOC, Fang et al. 2011, GBIF	Lonicera sp.	0	0	0	0	1	1	0	0	0	0	0	1	1	0	0	0	0	0	0	0	0	0	0	0	0	0
Dipsacales: Caprifoliaceae: Caprifolieae	Lonicera		Lonicera nervosa Maxim.	FOC, Fang et al. 2011, GBIF	Lonicera sp.	0	0	0	0	1	0	0	0	0	0	0	0	1	0	1	1	1	0	0	0	0	0	0	0	0	0
Dipsacales: Caprifoliaceae: Caprifolieae	Lonicera		Lonicera nigra L.	FOC, Fang et al. 2011, GBIF	Lonicera sp.	0	0	0	0	1	1	0	0	1	1	0	0	0	0	1	0	0	0	0	0	0	0	0	0	0	0
Dipsacales: Caprifoliaceae: Caprifolieae	Lonicera		Lonicera nitida E.H.Wilson	Fang et al. 2011, GBIF	Lonicera sp.	0	0	0	0	0	0	0	0	0	0	0	1	1	0	0	0	0	0	0	0	0	0	0	0	0	0
Dipsacales: Caprifoliaceae: Caprifolieae	Lonicera		Lonicera nubium (Hand.-Mazz.) Hand.-Mazz.	Fang et al. 2011, GBIF	Lonicera sp.	0	0	0	0	1	0	0	0	0	0	0	1	0	0	0	0	0	0	0	0	0	0	0	0	0	0
Dipsacales: Caprifoliaceae: Caprifolieae	Lonicera		Lonicera nummulariifolia Jaub. & Spach	GBIF, FOP	Lonicera sp.	0	0	0	0	0	0	0	0	0	0	0	0	0	0	0	0	0	1	1	0	1	1	0	0	0	0
Dipsacales: Caprifoliaceae: Caprifolieae	Lonicera		Lonicera oblata K.S.Hao ex P.S.Hsu &H.J.Wang	FOC, Fang et al. 2011, GBIF	Lonicera sp.	0	0	0	0	0	0	0	0	0	0	0	0	0	1	1	0	0	0	0	0	0	0	0	0	0	0
Dipsacales: Caprifoliaceae: Caprifolieae	Lonicera		Lonicera oblongifolia Hook.	GBIF, PDB	Lonicera sp.	0	0	0	0	0	0	0	0	1	1	0	0	0	0	0	0	0	0	0	0	0	0	0	0	0	0
Dipsacales: Caprifoliaceae: Caprifolieae	Lonicera		Lonicera obovata Royle	GBIF, FOP	Lonicera sp.	0	0	0	0	1	1	0	0	1	1	0	1	1	0	0	0	0	0	0	0	1	1	0	0	0	0
Dipsacales: Caprifoliaceae: Caprifolieae	Lonicera		Lonicera oiwakensis Hyata	Fang et al. 2011, GBIF	Lonicera sp.	0	0	0	0	1	1	0	0	0	0	0	0	0	0	0	0	0	0	0	0	0	0	0	0	0	0
Dipsacales: Caprifoliaceae: Caprifolieae	Lonicera		Lonicera oreodoxa Harry Sm. Ex Rehder	FOC, Fang et al. 2011, GBIF	Lonicera sp.	0	0	0	0	0	0	0	0	0	0	0	0	1	0	1	1	0	0	0	0	0	0	0	0	0	0
Dipsacales: Caprifoliaceae: Caprifolieae	Lonicera		Lonicera pampaninii H.Lév. & Hand.-Mazz.	FOC, Fang et al. 2011, GBIF	Lonicera sp.	0	0	0	0	1	1	0	0	0	0	0	1	1	0	0	0	0	0	0	0	0	0	0	0	0	0
Dipsacales: Caprifoliaceae: Caprifolieae	Lonicera		Lonicera periclymenum L.	GBIF	Lonicera sp.	0	0	0	0	1	1	0	0	0	0	0	0	0	0	0	0	0	1	1	0	0	0	0	0	0	0
Dipsacales: Caprifoliaceae: Caprifolieae	Lonicera		Lonicera pileata Oliv.	Fang et al. 2011, GBIF	Lonicera sp.	0	0	0	0	1	1	0	0	0	0	0	1	1	0	0	0	0	0	0	0	0	0	0	0	0	0
Dipsacales: Caprifoliaceae: Caprifolieae	Lonicera		Lonicera praeflorens Batalin	FOC, Fang et al. 2011, GBIF	Lonicera sp.	0	0	0	0	1	0	0	0	0	0	0	0	0	1	1	0	0	0	0	0	0	0	0	0	0	0
Dipsacales: Caprifoliaceae: Caprifolieae	Lonicera		Lonicera purpurascens (Decne.) Walp. In Walp.	GBIF, FOP	Lonicera sp.	0	0	0	0	1	1	0	0	1	1	0	1	1	0	0	0	0	0	0	0	0	0	0	0	0	0
Dipsacales: Caprifoliaceae: Caprifolieae	Lonicera		Lonicera quinquelocularis Hardwicke in Hook.	GBIF, FOP	Lonicera sp.	0	0	0	0	1	1	0	0	1	1	0	1	1	0	0	0	0	0	0	0	1	1	0	1	0	0
Dipsacales: Caprifoliaceae: Caprifolieae	Lonicera		Lonicera reticulata Raf.	FOC, GBIF	Lonicera sp.	0	0	0	0	1	0	0	0	0	0	0	0	0	0	0	0	0	0	0	0	0	0	0	0	0	0
Dipsacales: Caprifoliaceae: Caprifolieae	Lonicera		Lonicera retusa Franch.	FOC, Fang et al. 2011, GBIF	Lonicera sp.	0	0	0	0	0	0	0	0	0	0	0	0	1	1	1	1	0	0	0	0	0	0	0	0	0	0
Dipsacales: Caprifoliaceae: Caprifolieae	Lonicera		Lonicera rupicula Hook.f. & Thomson	FOC, Fang et al. 2011, GBIF	Lonicera sp.	0	0	0	0	0	0	0	0	0	0	0	0	1	0	1	1	1	0	0	0	0	0	0	1	0	0
Dipsacales: Caprifoliaceae: Caprifolieae	Lonicera		Lonicera ruprechtiana Regel	FOC, Fang et al. 2011, GBIF	Lonicera sp.	0	0	0	0	0	0	0	0	0	0	0	0	0	1	1	1	0	0	0	0	0	0	0	0	0	0
Dipsacales: Caprifoliaceae: Caprifolieae	Lonicera		Lonicera semenovii Regel	FOC, Fang et al. 2011, GBIF, FOP	Lonicera sp.	0	0	0	0	1	1	0	0	1	1	0	1	1	0	0	0	0	0	0	0	0	0	0	1	0	1
Dipsacales: Caprifoliaceae: Caprifolieae	Lonicera		Lonicera sempervirens L.	GBIF, PDB	Lonicera sp.	0	0	0	0	1	0	0	0	0	1	0	0	0	0	0	0	0	0	0	0	0	0	0	0	0	0
Dipsacales: Caprifoliaceae: Caprifolieae	Lonicera		Lonicera serreana Hand.-Mazz.	FOC, Fang et al. 2011, GBIF	Lonicera sp.	0	0	0	0	0	0	0	0	0	0	0	1	1	1	1	1	1	0	0	0	0	0	0	0	0	0
Dipsacales: Caprifoliaceae: Caprifolieae	Lonicera		Lonicera setifera Franch.	FOC, Fang et al. 2011, GBIF	Lonicera sp.	0	0	0	0	0	0	0	0	0	0	0	0	1	0	1	1	1	0	0	0	0	0	0	0	0	0
Dipsacales: Caprifoliaceae: Caprifolieae	Lonicera		Lonicera similis Hemsl.	FOC, Fang et al. 2011, GBIF	Lonicera sp.	0	0	0	0	1	1	0	0	0	0	0	1	1	0	0	0	0	0	0	0	0	0	0	0	0	0
Dipsacales: Caprifoliaceae: Caprifolieae	Lonicera		Lonicera spinosa (Decne.) Jacquem. Ex. Walp.	FOC, Fang et al. 2011, GBIF	Lonicera sp.	0	0	0	0	0	0	0	0	1	1	0	1	1	0	1	1	1	0	0	0	0	0	0	0	0	0
Dipsacales: Caprifoliaceae: Caprifolieae	Lonicera		Lonicera stephanocarpa Franch.	FOC, Fang et al. 2011, GBIF	Lonicera sp.	0	0	0	0	0	0	0	0	0	0	0	0	1	1	1	1	0	0	0	0	0	0	0	0	0	0
Dipsacales: Caprifoliaceae: Caprifolieae	Lonicera		Lonicera subequalis Rehder	FOC, Fang et al. 2011, GBIF	Lonicera sp.	0	0	0	0	1	1	0	0	0	0	0	1	1	0	0	0	0	0	0	0	0	0	0	0	0	0
Dipsacales: Caprifoliaceae: Caprifolieae	Lonicera		Lonicera subhispida Nakai	FOC, Fang et al. 2011, GBIF	Lonicera sp.	0	0	0	0	0	0	0	0	0	0	0	0	1	0	1	1	0	0	0	0	0	0	0	0	0	0
Dipsacales: Caprifoliaceae: Caprifolieae	Lonicera		Lonicera subspicata Hook. & Arn.	GBIF, PDB	Lonicera sp.	0	0	0	0	0	0	0	0	0	0	0	0	0	0	0	0	0	0	1	0	0	0	0	1	0	0
Dipsacales: Caprifoliaceae: Caprifolieae	Lonicera		Lonicera tangutica Maxim.	FOC, Fang et al. 2011, GBIF	Lonicera sp.	0	0	0	0	1	1	0	0	0	0	0	1	1	1	1	1	1	0	0	0	0	0	0	1	0	1
Dipsacales: Caprifoliaceae: Caprifolieae	Lonicera		Lonicera tatarica L.	FOC, Fang et al. 2011, GBIF	Lonicera sp.	0	0	0	0	1	1	0	1	1	1	0	0	0	0	0	0	0	0	0	0	0	0	0	1	0	1
Dipsacales: Caprifoliaceae: Caprifolieae	Lonicera		Lonicera tatarinowii Maxim.	FOC, Fang et al. 2011, GBIF	Lonicera sp.	0	0	0	0	0	0	0	0	0	0	0	1	0	1	1	0	0	0	0	0	0	0	0	0	0	0
Dipsacales: Caprifoliaceae: Caprifolieae	Lonicera		Lonicera tomentella J.D.Hooker & Thomson	FOC, Fang et al. 2011, GBIF	Lonicera sp.	0	0	0	0	0	0	0	0	0	0	0	1	1	0	1	1	0	0	0	0	0	0	0	0	0	0
Dipsacales: Caprifoliaceae: Caprifolieae	Lonicera		Lonicera tragophylla Hemsl.	FOC, Fang et al. 2011, GBIF	Lonicera sp.	0	0	0	0	1	1	0	0	0	0	0	1	1	0	1	1	0	0	0	0	0	0	0	0	0	0
Dipsacales: Caprifoliaceae: Caprifolieae	Lonicera		Lonicera trichosantha Bureau & Franch.	FOC, Fang et al. 2011, GBIF	Lonicera sp.	0	0	0	0	0	0	0	0	0	0	0	0	1	0	1	1	1	0	0	0	0	0	0	0	0	0
Dipsacales: Caprifoliaceae: Caprifolieae	Lonicera		Lonicera trichosepala (Rehder) P.S.Hsu	Fang et al. 2011, GBIF	Lonicera sp.	0	0	0	0	1	0	0	0	0	0	0	0	0	0	0	0	0	0	0	0	0	0	0	0	0	0
Dipsacales: Caprifoliaceae: Caprifolieae	Lonicera		Lonicera tubuliflora Rehder in Sarg.	FOC, Fang et al. 2011, GBIF	Lonicera sp.	0	0	0	0	0	0	0	0	0	0	0	1	0	0	0	0	0	0	0	0	0	0	0	0	0	0
Dipsacales: Caprifoliaceae: Caprifolieae	Lonicera		Lonicera utahensis S.Watson	GBIF, PDB	Lonicera sp.	0	0	0	0	1	1	0	0	1	1	0	0	0	0	0	0	0	0	1	0	1	1	0	0	0	0
Dipsacales: Caprifoliaceae: Caprifolieae	Lonicera		Lonicera villosa (Michx.) Schult.	GBIF, PDB	Lonicera sp.	0	0	0	0	1	0	0	0	1	1	0	0	0	0	0	0	0	0	0	0	0	0	0	0	0	0
Dipsacales: Caprifoliaceae: Caprifolieae	Lonicera		Lonicera virgultorum W.W.Sm.	Fang et al. 2011, GBIF	Lonicera sp.	0	0	0	0	0	0	0	0	0	0	0	0	1	0	0	0	0	0	0	0	0	0	0	0	0	0
Dipsacales: Caprifoliaceae: Caprifolieae	Lonicera		Lonicera webbiana Wall. Ex DC.	FOC, Fang et al. 2011, GBIF	Lonicera sp.	0	0	0	0	0	0	0	0	0	0	0	1	1	1	1	1	1	0	0	0	0	0	0	1	0	1
Dipsacales: Caprifoliaceae: Caprifolieae	Lonicera		Lonicera xylosteum L.	GBIF	Lonicera sp.	0	0	0	0	1	1	0	0	1	1	0	0	0	0	0	0	0	0	1	0	0	0	0	0	0	0
Dipsacales: Caprifoliaceae: Caprifolieae	Lonicera		Lonicera yunnanensis Franch.	FOC, Fang et al. 2011, GBIF	Lonicera sp.	0	0	0	0	1	1	0	0	0	0	0	1	1	0	1	1	0	0	0	0	0	0	0	0	0	0
Dipsacales: Caprifoliaceae: Linnaeoideae	Linnaea		Linnaea amabilis (Graebn.) Christenh.	FOC, Fang et al. 2011, GBIF, Christenhusz 2013	Linnaeoideae den. Indet.	0	0	0	0	1	0	0	0	0	0	0	1	0	0	0	0	0	0	0	0	0	0	0	0	0	0
Dipsacales: Caprifoliaceae: Linnaeoideae	Linnaea		Linnaea borealis L.	FOC, Fang et al. 2011, GBIF, PDB, virtuellen floran, Christenhusz 2013	Linnaeoideae den. Indet.	0	0	0	0	1	1	1	1	1	1	0	0	0	0	1	1	0	0	1	0	0	0	0	0	0	0
Dipsacales: Caprifoliaceae: Linnaeoideae	Linnaea		Linnaea chinensis (R.Br.) A.Braun & Vatke	FOC, Fang et al. 2011, GBIF, Christenhusz 2013	Linnaeoideae den. Indet.	0	0	0	0	1	1	0	0	0	0	0	1	1	0	0	0	0	0	0	0	0	0	0	0	0	0
Dipsacales: Caprifoliaceae: Linnaeoideae	Linnaea		Linnaea coriaceae Christenh.	GBIF, Christenhusz 2013	Linnaeoideae den. Indet.	0	0	0	0	0	0	0	0	0	0	0	0	0	0	0	0	0	0	0	0	0	0	0	0	0	0
Dipsacales: Caprifoliaceae: Linnaeoideae	Linnaea		Linnaea dipelta Christenh.	FOC, Fang et al. 2011, GBIF, Christenhusz 2013	Linnaeoideae den. Indet.	0	0	0	0	1	1	0	0	0	0	0	1	1	0	1	1	0	0	0	0	0	0	0	0	0	0
Dipsacales: Caprifoliaceae: Linnaeoideae	Linnaea		Linnaea elegans (Batalin) Christenh.	FOC, Fang et al. 2011, GBIF, Christenhusz 2013	Linnaeoideae den. Indet.	0	0	0	0	0	0	0	0	0	0	0	0	1	0	1	1	0	0	0	0	0	0	0	0	0	0
Dipsacales: Caprifoliaceae: Linnaeoideae	Linnaea		Linnaea floribunda (M.Mart. % Galleotti) A.Braun & Vatke	GBIF, Christenhusz 2013	Linnaeoideae den. Indet.	0	0	0	1	1	1	0	0	0	0	0	1	1	0	0	0	0	0	0	0	0	0	0	0	0	0
Dipsacales: Caprifoliaceae: Linnaeoideae	Linnaea		Linnaea forrestii Diels	FOC, Fang et al. 2011, GBIF, Christenhusz 2013	Linnaeoideae den. Indet.	0	0	0	0	1	1	0	0	0	0	0	1	1	0	0	0	0	0	0	0	0	0	0	0	0	0
Dipsacales: Caprifoliaceae: Linnaeoideae	Linnaea		Linnaea grandifolia (Villarreal) Christenh.	GBIF, Christenhusz 2013	Linnaeoideae den. Indet.	0	0	0	1	0	0	0	0	0	0	0	0	0	0	0	0	0	0	0	0	0	0	0	0	0	0
Dipsacales: Caprifoliaceae: Linnaeoideae	Linnaea		Linnaea mexicana (Villarreal) Christenh.	GBIF, Christenhusz 2013	Linnaeoideae den. Indet.	0	0	0	0	0	0	0	0	0	0	0	0	1	0	0	0	0	0	0	0	0	0	0	0	0	0
Dipsacales: Caprifoliaceae: Linnaeoideae	Linnaea		Linnaea occidentalis (Villarreal) Christenh.	GBIF, Christenhusz 2013	Linnaeoideae den. Indet.	0	0	0	0	0	0	0	0	0	0	0	1	1	0	0	0	0	0	0	0	0	0	0	0	0	0
Dipsacales: Caprifoliaceae: Linnaeoideae	Linnaea		Linnaea serrata Graebn.	FOJ, GBIF, Christenhusz 2013	Linnaeoideae den. Indet.	0	0	0	0	1	1	0	0	1	0	0	0	0	0	0	0	0	0	0	0	0	0	0	0	0	0
Dipsacales: Caprifoliaceae: Linnaeoideae	Linnaea		Linnaea spathulata (Siebold & Zucc.) Christenh.	FOJ, GBIF, Christenhusz 2013	Linnaeoideae den. Indet.	0	0	0	0	1	1	0	0	1	0	0	0	0	0	0	0	0	0	0	0	0	0	0	0	0	0
Dipsacales: Caprifoliaceae: Linnaeoideae	Linnaea		Linnaea tetrasepala (Koidz.) Christenh.	FOJ, GBIF, Christenhusz 2013	Linnaeoideae den. Indet.	0	0	0	0	1	1	0	0	1	0	0	0	0	0	0	0	0	0	0	0	0	0	0	0	0	0
Dipsacales: Caprifoliaceae: Linnaeoideae	Linnaea		Linnaea uniflora A.Braun & Vatke (Abelia u. R.Br. In EFCH)	FOC, Fang et al. 2011, GBIF, Christenhusz 2013	Linnaeoideae den. Indet.	0	0	0	0	1	1	0	0	0	0	0	1	1	0	0	1	0	0	0	0	0	0	0	0	0	0
Dipsacales: Caprifoliaceae: Linnaeoideae	Linnaea		Linnaea yunnanensis (Franch) Christenh. (Dipelta y. in EFCH)	FOC, Fang et al. 2011, GBIF, Christenhusz 2013	Linnaeoideae den. Indet.	0	0	0	0	1	0	0	0	0	0	0	1	1	0	1	1	0	0	0	0	0	0	0	0	0	0
Dipsacales: Caprifoliaceae: Linnaeoideae	Zabelia		Zabelia biflora (Turcz.) Makino	FOC, Fang et al. 2011, GBIF, Christenhusz 2013	Linnaeoideae den. Indet.	0	0	0	0	1	1	0	0	0	0	0	1	1	1	1	1	0	0	0	0	0	0	0	0	0	0
Dipsacales: Caprifoliaceae: Linnaeoideae	Zabelia		Zabelia dielsii (Graebn.) Makino	GBIF, Christenhusz 2013	Linnaeoideae den. Indet.	0	0	0	0	0	0	0	0	0	0	0	0	0	0	0	0	0	0	0	0	0	0	0	0	0	0
Dipsacales: Caprifoliaceae: Linnaeoideae	Zabelia		Zabelia triflora (R.Br.) Makino	FOP, GBIF, Christenhusz 2013	Linnaeoideae den. Indet.	0	0	0	0	1	1	0	0	1	0	0	1	1	0	0	0	0	0	0	0	0	0	0	0	0	0
Dipsacales: Caprifoliaceae: Linnaeoideae	Zabelia		Zambelia corymbosa (Regel & Schmalh.) Makino	GBIF, Christenhusz 2013	Linnaeoideae den. Indet.	0	0	0	0	0	0	0	0	0	0	0	0	1	0	0	0	0	0	0	0	0	0	0	0	0	0
Dipsacales: Caprifoliaceae: Disacoideae	Dipsacus			GBIF	Disacus vel Cephalaria	0	0	0	0	1	1	0	1	1	0	0	1	1	1	1	1	0	0	0	0	0	0	0	0	0	0
Dipsacales: Caprifoliaceae: Disacoideae	Cephalaria			GBIF	Disacus vel Cephalaria	0	0	0	0	1	1	1	1	1	1	0	1	1	0	0	0	0	1	1	1	1	0	1	1	1	1
Dipsacales: Caprifoliaceae: Disacoideae	Scabiosa			GBIF	Scabiosa	0	0	0	1	1	1	1	1	1	1	0	1	1	1	1	1	0	1	1	1	1	0	1	1	1	0
Dipsacales: Caprifoliaceae: Valerianoideae				GBIF, PDB, FOI	Valerianoideae	1	1	1	1	1	1	1	1	1	1	0	1	1	1	1	1	1	1	1	1	1	1	1	1	1	0
Poales: Poaceae				GBIF	Poaceae gen. indet.	1	1	1	1	1	1	1	1	1	1	1	1	1	1	1	1	1	1	1	1	1	1	1	1	1	1
Poales Typhaceae	Typha			GBIF, PDB, Stevens 2001	Typha sp.	1	1	1	1	1	1	1	1	1	1	1	1	1	1	1	1	1	1	1	1	1	1	1	1	1	1
Poales Typhaceae	Sparganium			GBIF, PDB, Stevens 2001	Sparganium sp.	0	0	0	0	1	1	1	1	1	1	1	1	1	1	1	1	1	1	1	1	1	1	0	1	0	0
Liliales: Smilacaceae	Smilax			GBIF		1	1	1	1	1	1	0	1	1	0	0	1	1	1	1	0	0	1	0	0	0	0	0	0	0	0
Liliales: Smilax	Smilax	S. havanensis group	Smilax coriacea Spreng.	GBIF, Ferrufino-Acosta 2010, PDB	Smilax havanensis clade	1	1	0	1	0	1	0	0	0	0	0	0	0	0	0	0	0	0	0	0	0	0	0	0	0	0
Liliales: Smilax	Smilax	S. havanensis group	Smilax havanensis Jacq.	GBIF, Ferrufino-Acosta 2010	Smilax havanensis clade	0	1	0	1	0	1	0	0	0	0	0	0	0	0	0	0	0	0	0	0	0	0	0	1	0	0
Liliales: Smilax	Smilax	S. havanensis group	Smilax aquifolium Ferrufino & Greuter in Greuter & Rankin Rodriguez	GBIF, Ferrufino-Acosta 2010	Smilax havanensis clade	0	1	0	1	0	0	0	0	0	0	0	0	0	0	0	0	0	0	0	0	0	0	0	0	0	0
Liliales: Smilax	Smilax	S. havanensis group	Smilax cristalensis Ferrufino & Greuter in Greuter & Rankin Rodriguez	GBIF, Ferrufino-Acosta 2010	Smilax havanensis clade	0	1	0	1	0	0	0	0	0	0	0	0	0	0	0	0	0	0	0	0	0	0	0	0	0	0
Liliales: Smilax	Smilax	S. havanensis group	Smilax cupera Ferrufino & Greuter in Greuter & Rankin Rodriguez	GBIF, Ferrufino-Acosta 2010	Smilax havanensis clade	0	1	0	1	0	0	0	0	0	0	0	0	0	0	0	0	0	0	0	0	0	0	0	0	0	0
Liliales: Smilax	Smilax	S. havanensis group	Smilax gracilior Ferrufino & Greuter in Greuter & Rankin Rodriguez	GBIF, Ferrufino-Acosta 2010	Smilax havanensis clade	0	1	0	1	0	0	0	0	0	0	0	0	0	0	0	0	0	0	0	0	0	0	0	0	0	0
Liliales: Smilax	Smilax	S. havanensis group	Smilax ilicifolia Desv. ex Ham.	GBIF, Ferrufino-Acosta 2010	Smilax havanensis clade	1	1	0	1	0	0	0	0	0	0	0	0	0	0	0	0	0	0	0	0	0	0	0	0	0	0
Liliales: Smilax	Smilax	S. havanensis group	Smilax oblongata Sw.	GBIF, Ferrufino-Acosta 2010	Smilax havanensis clade	1	1	0	1	0	1	0	0	0	0	0	0	0	0	0	0	0	0	0	0	0	0	0	0	0	0
Liliales: Smilax	Smilax	S. havanensis group	Smilax populnea Kunth	GBIF, Ferrufino-Acosta 2010	Smilax havanensis clade	1	1	0	1	0	1	0	0	0	0	0	0	0	0	0	0	0	0	0	0	0	0	0	0	0	0
Liliales: Smilax	Smilax	S. havanensis group	Smilaxa viscifolia Duhamel	GBIF, Ferrufino-Acosta 2010	Smilax havanensis clade	0	0	0	0	0	0	0	0	0	0	0	0	0	0	0	0	0	0	0	0	0	0	0	0	0	0
Liliales: Smilax	Smilax	S. schomburgkiana group	Smilax schomburgkiana Kunth	GBIF, Ferrufino-Acosta 2010	Smilax havanensis clade	1	1	1	1	0	1	0	0	0	0	0	0	0	0	0	0	0	0	0	0	0	0	0	0	0	0
Liliales: Smilax	Smilax	S. schomburgkiana group	Smilax compta (Killip & C. V. Morton) Ferrufino	GBIF, Ferrufino-Acosta 2010	Smilax havanensis clade	1	1	0	0	0	0	0	0	0	0	0	0	0	0	0	0	0	0	0	0	0	0	0	0	0	0
Liliales: Smilax	Smilax	S. schomburgkiana group	Smilax bella J.F.Macbr.	GBIF, Ferrufino-Acosta 2010	Smilax havanensis clade	1	0	0	1	0	0	0	0	0	0	0	0	0	0	0	0	0	0	0	0	0	0	0	0	0	0	too few geo-referenced points
Liliales: Smilax	Smilax	S. schomburgkiana group	Smilax cordato-ovata Rich.	GBIF, Ferrufino-Acosta 2010	Smilax havanensis clade	1	1	0	0	0	0	0	0	0	0	0	0	0	0	0	0	0	0	0	0	0	0	0	0	0	0	too few geo-referenced points
Liliales: Smilax	Smilax	S. schomburgkiana group	Smilax hilariana A.DC. & C.DC.	GBIF, Ferrufino-Acosta 2010	Smilax havanensis clade	0	0	1	1	1	1	0	0	0	0	0	1	1	0	0	0	0	0	0	0	0	0	0	0	0	0
Liliales: Smilax	Smilax	S. schomburgkiana group	Smilax japicanga Griseb.	GBIF, Ferrufino-Acosta 2010	Smilax havanensis clade	1	0	1	1	0	0	0	0	0	0	0	1	1	0	0	0	0	0	0	0	0	0	0	0	0	0
Liliales: Smilax	Smilax	S. schomburgkiana group	Smilax larvata Griseb.	GBIF, Ferrufino-Acosta 2010	Smilax havanensis clade	0	1	0	1	0	1	0	0	0	0	0	1	1	0	0	0	0	0	0	0	0	0	0	0	0	0
Liliales: Smilax	Smilax	S. schomburgkiana group	Smilax minarum A.DC.	GBIF, Ferrufino-Acosta 2010	Smilax havanensis clade	0	0	0	1	0	0	0	0	0	0	0	1	1	0	0	0	0	0	0	0	0	0	0	0	0	0
Liliales: Smilax	Smilax	S. schomburgkiana group	Smilax stenophylla A.DC.	GBIF, Ferrufino-Acosta 2010	Smilax havanensis clade	1	1	0	1	1	1	0	0	0	0	0	1	1	0	0	0	0	0	0	0	0	0	0	0	0	0
Liliales: Smilax	Smilax	S. schomburgkiana group	Smilax subsessiliflora Duhamel	GBIF, Ferrufino-Acosta 2010	Smilax havanensis clade	0	0	0	1	1	1	0	0	0	0	0	0	0	0	0	0	0	0	0	0	0	0	0	0	0	0
Liliales: Smilax	Smilax	S. schomburgkiana group	Smilax verrucosa Griseb.	GBIF, Ferrufino-Acosta 2010	Smilax havanensis clade	0	0	0	1	1	0	0	0	0	0	0	0	0	0	0	0	0	0	0	0	0	0	0	0	0	0
Ranunculales: Ranunculaceae				GBIF	Ranunculaceae gen. indet.	1	1	1	1	1	1	1	1	1	1	1	1	1	1	1	1	1	1	1	1	1	1	1	1	1	1
Ranunculales: Berberidiaceae	Mahonia	Orientalis ( Longibracteatae/Dolichopodae)	Mahonia gracilipes (Oliver) Fedde	Kim et al 2004, FOC, Fang et al. 2011, GBIF		0	0	0	0	1	1	0	0	0	0	0	1	1	0	0	0	0	0	0	0	0	0	0	0	0	0
Ranunculales: Berberidiaceae	Mahonia	Orientalis ( Longibracteatae/Dolichopodae)	Mahonia polyodonta Fedde	Kim et al 2004, FOC, Fang et al. 2011, GBIF		0	0	0	0	1	1	0	0	0	0	0	1	1	0	0	0	0	0	0	0	0	0	0	0	0	0
Ranunculales: Berberidiaceae	Mahonia	Orientalis ( Longibracteatae/Eulongibracteatae)	Mahonia eurybracteata Fedde	Kim et al 2004, FOC, Fang et al. 2011, GBIF		0	0	0	0	1	1	0	0	0	0	0	1	1	0	0	0	0	0	0	0	0	0	0	0	0	0
Ranunculales: Berberidiaceae	Mahonia	Orientalis ( Longibracteatae/Eulongibracteatae)	Mahonia longibracteata (Takeda) Laferr.	Kim et al 2004, FOC, Fang et al. 2011, GBIF		0	0	0	0	0	0	0	0	0	0	0	1	1	0	0	0	0	0	0	0	0	0	0	0	0	0
Ranunculales: Berberidiaceae	Mahonia	Orientalis ( Longibracteatae/Eulongibracteatae)	Mahonia veitchiorum Hemsl. & E.H. Wils.	Kim et al 2004, GBIF		0	0	0	0	1	0	0	0	0	0	0	0	1	0	0	0	0	0	0	0	0	0	0	0	0	0	too few geo-referenced points
Ranunculales: Berberidiaceae	Mahonia	Orientalis ( Longibracteatae/Japonicae )	Mahonia bodinieri (Gagnep.) Laferr. (=Berberis leveilleana (C.K.Schneid.) Laferr.)	Kim et al 2004, FOC, Fang et al. 2011, GBIF		0	0	0	0	1	1	0	0	0	0	0	1	1	0	0	0	0	0	0	0	0	0	0	0	0	0
Ranunculales: Berberidiaceae	Mahonia	Orientalis ( Longibracteatae/Japonicae )	Mahonia japonica (Thunb.) DC.	Kim et al 2004, FOC, Fang et al. 2011, GBIF		0	0	0	0	1	1	1	0	0	0	0	1	1	0	0	0	0	0	0	0	0	0	0	0	0	0
Ranunculales: Berberidiaceae	Mahonia	Orientalis ( Longibracteatae/Napaulenses )	Mahonia flavida (C.K. Schneid.) Laferr. (=Berberis duclouxiana (Gagnep.) Laferr.)	Kim et al 2004, GBIF		0	0	0	1	1	0	0	0	0	0	0	1	1	0	0	0	0	0	0	0	0	0	0	0	0	0
Ranunculales: Berberidiaceae	Mahonia	Orientalis ( Longibracteatae/Napaulenses )	Mahonia oiwakensis Hayata (M. lomariifolia Takeda)	Kim et al 2004, GBIF		0	0	0	0	1	1	1	0	0	0	0	1	1	0	0	1	0	0	0	0	0	0	0	0	0	0
Ranunculales: Berberidiaceae	Mahonia	Orientalis ( Longibracteatae/Napaulenses )	Mahonia napaulensis DC.	Kim et al 2004, FOC, Fang et al. 2011, GBIF		0	0	0	0	0	0	0	0	0	0	0	1	1	0	0	0	0	0	0	0	0	0	0	0	0	0
Ranunculales: Berberidiaceae	Mahonia	Orientalis ( Longibracteatae/Nervosae )	Mahonia fortunei (Lindl.) Fedde	Kim et al 2004, FOC, Fang et al. 2011, GBIF		0	0	0	0	1	1	0	0	0	0	0	1	1	0	0	0	0	0	0	0	0	0	0	0	0	0
Ranunculales: Berberidiaceae	Mahonia	Orientalis ( Longibracteatae/Nervosae )	Mahonia nervosa (Pursh) Nutt.	Kim et al 2004, PDB, GBIF		0	0	0	0	0	1	1	0	1	0	0	0	0	0	0	0	0	0	1	0	1	0	0	0	0	0
Ranunculales: Berberidiaceae	Mahonia	Orientalis	Mahonia bracteolata Takeda	FOC, Fang et al. 2011, GBIF		0	0	0	0	0	0	0	0	0	0	0	0	1	0	0	0	0	0	0	0	0	0	0	0	0	0
Ranunculales: Berberidiaceae	Mahonia	Orientalis	Mahonia monyulensis Ahrendt,	FOC, Fang et al. 2011, GBIF		0	0	0	0	0	0	0	0	0	0	0	0	1	0	0	1	0	0	0	0	0	0	0	0	0	0
Ranunculales: Berberidiaceae	Mahonia	Orientalis	Mahonia calamicaulis Sparre & C. E. C. Fischer	FOC, Fang et al. 2011, GBIF		0	0	0	0	0	0	0	0	0	0	0	0	1	0	1	1	0	0	0	0	0	0	0	0	0	0
Ranunculales: Berberidiaceae	Mahonia	Orientalis	Mahonia taronensis Handel-Mazzetti (=Berberis tibetensis Hand.-Mazz.)	FOC, Fang et al. 2011, GBIF		0	0	0	0	0	0	0	0	0	0	0	0	1	0	0	1	0	0	0	0	0	0	0	0	0	0
Ranunculales: Berberidiaceae	Mahonia	Orientalis	Mahonia subimbricata Chun & F.Chun	FOC, Fang et al. 2011, GBIF		0	0	0	0	0	0	0	0	0	0	0	1	0	0	0	0	0	0	0	0	0	0	0	0	0	0
Ranunculales: Berberidiaceae	Mahonia	Orientalis	Mahonia shenii Chun	FOC, Fang et al. 2011, GBIF		0	0	0	0	1	0	0	0	0	0	0	1	0	0	0	0	0	0	0	0	0	0	0	0	0	0
Ranunculales: Berberidiaceae	Mahonia	Orientalis	Mahonia breviracema Y. S. Wang & P. K. Hsiao	FOC, Fang et al. 2011, GBIF		0	0	0	0	1	1	0	0	0	0	0	0	0	0	0	0	0	0	0	0	0	0	0	0	0	0
Ranunculales: Berberidiaceae	Mahonia	Orientalis	Mahonia setosa Gagnepain	FOC, Fang et al. 2011, GBIF		0	0	0	0	0	0	0	0	0	0	0	1	0	0	0	0	0	0	0	0	0	0	0	0	0	0
Ranunculales: Berberidiaceae	Mahonia	Orientalis	Mahonia decipiens C. K. Schneider in Sargent	FOC, Fang et al. 2011, GBIF		0	0	0	0	1	1	0	0	0	0	0	1	1	0	0	0	0	0	0	0	0	0	0	0	0	0
Ranunculales: Berberidiaceae	Mahonia	Orientalis	Mahonia paucijuga C. Y. Wu ex S. Y. Bao	FOC, Fang et al. 2011, GBIF		0	0	0	0	0	0	0	0	0	0	0	1	1	0	0	0	0	0	0	0	0	0	0	0	0	0
Ranunculales: Berberidiaceae	Mahonia	Orientalis	Mahonia microphylla T. S. Ying & G. R. Long	FOC, GBIF		0	0	0	0	0	0	0	0	0	0	0	1	0	0	0	0	0	0	0	0	0	0	0	0	0	0	too few geo-referenced points
Ranunculales: Berberidiaceae	Mahonia	Orientalis	Mahonia leptodonta Gagnepain	FOC, Fang et al. 2011, GBIF		0	0	0	0	0	0	0	0	0	0	0	1	0	0	0	0	0	0	0	0	0	0	0	0	0	0
Ranunculales: Berberidiaceae	Mahonia	Orientalis	Mahonia retinervis P. K. Hsiao & Y. S. Wang	FOC, Fang et al. 2011		0	0	0	0	1	0	0	0	0	0	0	1	0	0	0	0	0	0	0	0	0	0	0	0	0	0
Ranunculales: Berberidiaceae	Mahonia	Orientalis	Mahonia bealei (Fortune) Carrière	FOC, Fang et al. 2011, GBIF		0	0	0	0	1	1	0	0	0	0	0	1	1	0	0	1	0	0	0	0	0	0	0	0	0	0
Ranunculales: Berberidiaceae	Mahonia	Orientalis	Mahonia cardiophylla T. S. Ying & Boufford in T. S. Ying,	FOC, GBIF		0	0	0	0	0	0	0	0	0	0	0	1	1	0	0	0	0	0	0	0	0	0	0	0	0	0	too few geo-referenced points
Ranunculales: Berberidiaceae	Mahonia	Orientalis	Mahonia nitens C. K. Schneider in Sargent,	FOC, Fang et al. 2011, GBIF		0	0	0	0	1	1	0	0	0	0	0	1	1	0	0	0	0	0	0	0	0	0	0	0	0	0
Ranunculales: Berberidiaceae	Mahonia	Orientalis	Mahonia conferta Takeda =Berberis henryi Laferr.)	FOC, Fang et al. 2011, GBIF		0	0	0	0	1	0	0	0	0	0	0	1	0	0	0	0	0	0	0	0	0	0	0	0	0	0
Ranunculales: Berberidiaceae	Mahonia	Orientalis	Mahonia imbricata T. S. Ying & Boufford in T. S. Ying	FOC, GBIF		0	0	0	0	0	0	0	0	0	0	0	1	1	0	0	0	0	0	0	0	0	0	0	0	0	0	too few geo-referenced points
Ranunculales: Berberidiaceae	Mahonia	Orientalis	Mahonia sheridaniana C. K. Schneider in Sargent	FOC, Fang et al. 2011, GBIF		0	0	0	0	1	1	0	0	0	0	0	1	1	0	0	0	0	0	0	0	0	0	0	0	0	0
Ranunculales: Berberidiaceae	Mahonia	Orientalis	Mahonia fordii C. K. Schneider in Sargent	FOC, Fang et al. 2011, GBIF		0	0	0	0	1	0	0	0	0	0	0	1	0	0	0	0	0	0	0	0	0	0	0	0	0	0
Ranunculales: Berberidiaceae	Mahonia	Orientalis	Mahonia hancockiana Takeda	FOC, Fang et al. 2011, GBIF		0	0	0	0	0	0	0	0	0	0	0	1	1	0	0	0	0	0	0	0	0	0	0	0	0	0
Ranunculales: Berberidiaceae	Mahonia	Orientalis	Mahonia borealis Takeda	FOP, GBIF		0	0	0	0	1	0	0	0	0	0	0	0	0	0	0	0	0	0	0	0	0	0	0	0	0	0	too few geo-referenced points

## Sheet: Genus Köppen
Lineage	Genus	Subgenus*	Af	Am	As	Aw	Cfa	Cfb	Cfc	Dfa	Dfb	Dfc	Dfd	Cwa	Cwb	Dwa	Dwb	Dwc	ET	Csa	Csb	Dsa	Dsb	Dsc	BSh	BSk	BWh	BWk
Gnetales: Ephedraceae	Ephedra		0	0	0	1	1	1	1	1	1	1	0	1	1	1	1	1	1	1	1	0	1	1	1	1	1	1
GYM:Cupressaceae/ non papillateCupressaceae			1	1	1	1	1	1	1	1	1	1	1	1	1	1	1	1	1	1	1	1	1	1	1	1	1	1
GYM:Cupressaceae/papillate Cupressaceae			1	1	1	1	1	1	1	0	1	0	0	1	1	0	0	0	0	1	1	0	0	1	1	0	0	0
GYM:Pinaceae	Cathaya		0	0	0	0	1	1	0	0	0	0	0	0	0	0	0	0	0	0	0	0	0	0	0	0	0	0
GYM:Pinaceae	Cedrus		0	0	0	0	1	1	0	0	1	1	0	1	1	0	0	1	0	1	1	0	1	0	1	1	0	0
GYM:Pinaceae	Pinus	Strobus (S.sect. Strobus)	0	1	1	1	1	1	1	1	1	1	0	1	1	1	1	1	1	1	1	1	1	1	1	1	1	0
GYM:Pinaceae	Pinus	Pinus	1	1	1	1	1	1	1	1	1	1	0	1	1	1	1	1	1	1	1	0	1	1	1	1	1	0
GYM:Pinaceae	Picea	Picea (S.sect. Abies)	0	0	0	0	1	1	1	1	1	1	0	1	1	1	1	1	1	1	1	0	1	1	0	1	0	1
GYM:Pinaceae	Pseudotsuga		0	0	0	0	1	1	1	0	1	1	0	1	1	0	0	0	0	1	1	0	1	1	0	1	0	0
GYM:Pinaceae	Larix		0	0	0	0	1	1	1	1	1	1	0	1	1	1	1	1	1	0	1	0	1	1	0	1	0	0
GYM:Pinaceae	Tsuga		0	1	0	1	1	1	1	1	1	1	0	1	1	0	1	1	1	0	1	0	1	1	1	1	0	0
Buxales:Buxaceae	Buxus	Eurasian clade	0	1	0	1	1	1	1	0	0	0	0	1	1	0	0	0	0	1	1	0	0	0	1	1	1	0
Saxifragales:Altingiaceae	Liquidambar		1	1	0	1	1	1	0	0	0	0	0	1	1	0	0	0	0	1	0	0	0	0	0	0	0	0
Malpighiales: Salicaceae	Populus		0	0	0	1	1	1	1	1	1	1	0	1	1	1	1	1	1	1	1	1	1	1	1	1	1	1
Malpighiales: Salicaceae	Salix		0	1	1	1	1	1	1	1	1	1	1	1	1	1	1	1	1	1	1	1	1	1	1	1	1	1
Malpighiales: Euphorbiaceae			1	1	1	1	1	1	1	1	1	1	0	1	1	1	1	1	1	1	1	1	1	1	1	1	1	1
Malpighiales: Linaceae	Linum		0	1	1	1	1	1	1	1	1	1	0	1	1	1	1	1	1	1	1	0	1	1	1	1	1	1
Fabales: Fabaceae			1	1	1	1	1	1	1	1	1	1	1	1	1	1	1	1	1	1	1	1	1	1	1	1	1	1
Fabales: Fabaceae	Apios		1	1	0	1	1	1	1	1	1	0	0	1	1	1	0	0	0	0	0	0	0	0	0	0	0	0
Rosales:Rosaceae			1	1	1	1	1	1	1	1	1	1	1	1	1	1	1	1	1	1	1	1	1	1	1	1	1	1
Rosales:Rosaceae	Prunus		0	0	0	0	1	1	0	1	1	1	0	1	1	0	1	0	0	0	1	0	0	0	0	0	0	0
Rosales:Rosaceae:Maloideae	Sorbus		0	1	0	1	1	1	1	1	1	1	0	1	1	1	1	1	1	1	1	0	1	1	1	1	0	1
Rosales:Cannabaceae	Celtis		1	1	1	1	1	1	0	1	1	0	0	1	1	1	1	0	0	1	1	1	1	0	1	1	1	0
Rosales:Cannabaceae	Pteroceltis		0	0	0	0	1	1	0	0	0	0	0	1	1	1	1	0	0	0	0	0	0	0	0	1	0	0
Rosales: Urticaceae vel Moraceae			1	1	1	1	1	1	1	1	1	1	0	1	1	1	1	1	1	1	1	1	1	1	1	1	1	1
Rosales:Ulmaceae	Ulmus		1	1	0	1	1	1	1	1	1	1	0	1	1	1	1	1	0	1	1	1	1	0	1	1	0	0
Rosales:Ulmaceae	Zelkova		0	0	0	0	1	1	0	0	1	0	0	1	1	1	1	1	0	1	1	1	1	0	0	0	0	0
Fagales:Betulaceae:Betuloideae	Alnus		0	0	0	1	1	1	1	1	1	1	0	1	1	1	1	1	0	1	1	0	1	1	1	1	0	0
Fagales:Betulaceae:Betuloideae	Betula		0	0	0	0	1	1	1	1	1	1	1	1	1	1	1	1	1	0	1	0	1	1	0	0	0	0
Fagales:Betulaceae:Coryloideae	Carpinus		0	1	1	1	1	1	1	1	1	0	0	1	1	1	1	1	0	1	0	0	0	0	0	0	0	0
Fagales:Betulaceae:Coryloideae	Corylus		0	0	0	0	1	1	0	1	1	0	0	1	1	1	1	0	0	0	1	0	1	0	0	0	0	0
Fagales:Betulaceae:Coryloideae	Ostrya		0	0	0	1	1	1	0	1	1	0	0	1	1	1	1	0	0	1	1	0	0	0	1	1	1	1
Fagales:Fagaceae/Castanoideae			1	1	0	1	1	1	1	1	1	0	0	1	1	1	1	0	0	1	1	0	0	0	0	0	0	0
Fagales:Fagaceae	Fagus		0	0	0	0	1	1	0	1	1	0	0	1	1	0	0	0	0	1	1	0	0	0	0	0	0	0
Fagales:Fagaceae	Quercus	Section Cerris	0	0	0	1	1	1	0	0	1	0	0	1	1	1	1	0	0	1	1	1	1	0	0	1	1	0
Fagales:Fagaceae	Quercus	Section Ilex	0	0	0	1	1	1	0	0	1	0	0	1	1	0	1	1	0	1	1	0	1	0	0	1	0	0
Fagales:Fagaceae	Quercus	Section Quercus	1	1	1	1	1	1	0	1	1	1	0	1	1	1	1	1	0	1	1	1	1	0	1	1	1	1
Fagales:Juglandaceae: Engelhardioideae			1	1	1	1	1	1	0	0	0	0	0	1	1	0	0	0	0	0	0	0	0	0	0	0	0	0
Fagales:Juglandaceae:Juglandoideae	Carya		0	0	0	1	1	1	0	1	1	0	0	1	1	0	0	0	0	0	0	0	0	0	1	1	0	0
Fagales:Juglandaceae:Juglandoideae	Juglans		0	0	1	1	1	1	0	1	1	0	0	1	1	1	1	0	0	1	1	0	0	0	1	1	0	0
Fagales:Juglandaceae:Juglandoideae	Pterocarya vel Cyclocarya		0	0	0	1	1	1	1	1	1	0	0	1	1	1	1	0	0	1	0	0	0	0	0	0	0	0
Geeraniales: Geraniaceae	Erodium		0	0	0	1	1	1	1	0	1	1	0	1	1	1	1	0	0	1	1	0	0	0	1	1	1	1
Myrtales: Lythraceae	Decodon		0	0	0	0	1	1	0	1	1	0	0	0	0	0	0	0	0	0	0	0	0	0	0	0	0	0
Myrteales: Onagraceae	Ludwigia		1	1	1	1	1	1	1	1	1	0	0	1	1	1	0	0	0	1	1	0	0	0	1	1	1	1
Sapindales:Sapindaceae:Hippocastanoideae	Acer		1	1	0	1	1	1	1	1	1	1	0	1	1	1	1	1	1	1	1	1	1	1	1	1	1	0
Sapindales: Simaroubaceae	Ailanthus		1	1	0	1	1	1	0	0	1	0	0	1	1	1	0	0	0	0	0	0	0	0	1	1	0	0
Sapindales: Simaroubaceae	Picrasma		1	1	1	1	1	1	0	0	0	0	0	1	1	1	1	0	0	0	0	0	0	0	0	0	0	0
Sapindales: Nitrariaceae	Nitraria		0	0	0	0	0	0	0	1	1	1	0	1	0	0	1	1	1	1	0	1	1	0	1	1	1	1
Sapindales: Anacardiaceae			1	1	1	1	1	1	1	1	1	0	0	1	1	1	1	1	0	1	1	0	1	0	1	1	1	1
Malvales: Malvaceae/Malvoideae			1	1	1	1	1	1	1	1	1	1	1	1	1	1	1	1	1	1	1	1	1	1	1	1	1	1
Malvales: Malvaceae: Tilioideae	Tilia		0	0	1	1	1	1	1	1	1	1	0	1	1	1	1	1	1	1	1	0	0	0	0	1	1	0
Caryophyllales: Plumbaginaceae			1	1	1	1	1	1	1	1	1	1	1	1	1	1	1	1	1	1	1	1	1	1	1	1	1	1
Caryophyllales: Polygonaceae	Rumex		1	1	1	1	1	1	1	1	1	1	1	1	1	1	1	1	1	1	1	1	1	1	1	1	1	1
Caryophyllales: Polygonaceae	Polygonum		1	1	1	1	1	1	1	1	1	1	1	1	1	1	1	1	1	1	1	1	1	1	1	1	1	1
Caryophyllales: Polygonaceae	Persicaria		1	1	1	1	1	1	1	1	1	1	1	1	1	1	1	1	1	1	1	1	1	1	1	1	1	1
Caryophyllales: Caryophyllaceae			1	1	1	1	1	1	1	1	1	1	1	1	1	1	1	1	1	1	1	1	1	1	1	1	1	1
Caryophyllales: Amaranthaceae			1	1	1	1	1	1	1	1	1	1	1	1	1	1	1	1	1	1	1	1	1	1	1	1	1	1
Caryophyllales: Droseraceae	Drosera		1	1	1	1	1	1	1	1	1	1	0	1	1	1	1	0	0	0	1	0	0	0	0	0	0	0
Cornales: Nyssaceae	Nyssa		1	1	1	1	1	1	1	1	1	1	1	1	1	1	1	1	1	1	1	1	1	1	1	1	1	1
Ericales: Sapotaceae: Sapotaceae type 1A			1	1	1	1	1	1	0	0	0	0	0	1	1	0	0	0	0	0	1	0	0	0	1	1	1	0
Ericales: Ericaceae			1	1	1	1	1	1	1	1	1	1	1	1	1	1	1	1	1	1	1	1	1	1	1	1	1	1
Ericales: Ericaceae	Erica		1	1	0	1	1	1	0	0	1	1	0	1	1	0	0	0	1	1	1	0	0	0	1	1	1	0
Garryales: Eucommiaceae	Eucommia		0	0	0	0	1	1	0	0	0	0	0	1	1	0	0	0	0	0	0	0	0	0	0	0	0	0
Lamiales:Oleaceae	Oleaceae		1	1	1	1	1	1	1	1	1	1	1	1	1	1	1	1	0	1	1	1	1	0	1	1	1	1
Lamiales:Oleaceae:Fontanesieae	Fontanesia		0	0	0	0	1	1	0	0	0	0	0	1	1	1	1	0	0	1	1	0	0	0	0	1	0	0
Lamiales:Oleaceae:Oleeae:Ligustrinae	Ligustrum		0	1	0	1	1	1	1	0	1	1	0	1	1	1	1	1	0	1	1	0	0	0	1	1	0	0
Lamiales:Oleaceae:Oleeae:Ligustrinae	Syringa		0	0	0	0	1	1	0	0	1	1	0	1	1	1	1	1	1	1	1	0	0	0	0	1	0	1
Lamiales:Oleaceae:Oleeae:Fraxininae	Fraxinus		1	1	1	1	1	1	1	1	1	1	0	1	1	1	1	1	0	1	1	0	1	0	1	1	1	1
Lamiales:Oleaceae:Oleeae:Oleinae	Phillyrea		0	0	0	0	1	1	0	0	0	0	0	0	0	0	0	0	0	1	1	0	0	0	0	1	0	0
Lamiales:Oleaceae:Oleeae:Oleinae	Osmanthus		0	1	0	1	1	1	0	0	1	1	0	1	1	1	1	1	0	1	1	0	0	0	1	1	0	0
Lamiales:Oleaceae:Oleeae:Oleinae	Chionanthus		1	1	0	1	1	1	1	0	0	0	0	1	1	1	1	1	0	0	0	0	0	0	0	1	0	0
Lamiales:Oleaceae:Oleeae:Oleinae	Olea		1	1	1	1	1	1	0	0	0	0	0	1	1	0	0	0	0	1	1	0	0	0	1	1	1	1
Lamiales:Oleaceae:Oleeae:Oleinae	Noronhia		1	1	1	1	1	1	0	0	0	0	0	1	1	0	0	0	0	1	1	0	0	0	0	1	0	0
Solanales: Convolvulaceae	Convolvulus		1	1	1	1	1	1	1	1	1	1	1	1	1	1	1	1	0	1	1	1	1	1	1	1	1	1
Aquifoliales: Aquifoliaceae	Ilex		1	1	1	1	1	1	1	0	0	0	0	1	1	1	0	0	0	1	1	0	0	0	0	0	0	0
Asterales: Asteraceae			1	1	1	1	1	1	1	1	1	1	1	1	1	1	1	1	1	1	1	1	1	1	1	1	1	1
Asterales: Campanulaceae			1	1	1	1	1	1	1	1	1	1	1	1	1	1	1	1	1	1	1	1	1	1	1	1	1	1
Dipsacales: Adoxaceae	Viburnum		1	1	0	1	1	1	1	1	1	1	0	1	1	1	1	1	1	1	1	0	1	1	1	1	1	1
Dipsacales: Caprifoliaceae: Caprifolieae	Lonicera		0	1	0	1	1	1	0	1	1	1	0	1	1	1	1	1	1	1	1	0	1	1	1	1	1	1
Dipsacales: Caprifoliaceae: Linnaeoideae			0	0	0	1	1	1	1	1	1	1	0	1	1	1	1	1	0	0	1	0	0	0	0	0	0	0
Dipsacales: Caprifoliaceae: Disacoideae	Disacus vel Cephalaria		0	0	0	0	1	1	1	1	1	1	0	1	1	1	1	1	0	1	1	1	1	0	1	1	1	1
Dipsacales: Caprifoliaceae: Disacoideae	Scabiosa		0	0	0	1	1	1	1	1	1	1	0	1	1	1	1	1	0	1	1	1	1	0	1	1	1	0
Dipsacales: Caprifoliaceae: Valerianoideae			1	1	1	1	1	1	1	1	1	1	0	1	1	1	1	1	1	1	1	1	1	1	1	1	1	0
Poales: Poaceae			1	1	1	1	1	1	1	1	1	1	1	1	1	1	1	1	1	1	1	1	1	1	1	1	1	1
Poales Typhaceae	Typha		1	1	1	1	1	1	1	1	1	1	1	1	1	1	1	1	1	1	1	1	1	1	1	1	1	1
Poales Typhaceae	Sparganium		0	0	0	0	1	1	1	1	1	1	1	1	1	1	1	1	1	1	1	1	1	1	0	1	0	0
Ranunculales: Ranunculaceae			1	1	1	1	1	1	1	1	1	1	1	1	1	1	1	1	1	1	1	1	1	1	1	1	1	1
Ranunculales: Berberidiaceae	Mahonia	Orientalis	0	0	0	1	1	1	1	0	1	0	0	1	1	0	1	1	0	0	1	0	1	0	0	0	0	0
Liliales: Smilax	Smilax	S. havanensis clade	1	1	1	1	1	1	0	0	0	0	0	1	1	0	0	0	0	0	0	0	0	0	0	1	0	0
Liliales: Smilacaceae	Smilax		1	1	1	1	1	1	0	1	1	0	0	1	1	1	1	0	0	1	0	0	0	0	0	0	0	0
			47	57	44	71	89	89	58	62	75	55	22	87	86	68	69	56	39	70	74	35	53	39	56	69	47	39	1556
			0.0309414	0.0375247	0.0289664	0.0467413	0.0585912	0.0585912	0.038183	0.0408163	0.0493746	0.036208	0.0144832	0.0572745	0.0566162	0.0447663	0.0454246	0.0368664	0.0256748	0.0460829	0.0487163	0.0230415	0.0348914	0.0256748	0.0368664	0.0454246	0.0309414	0.0256748

## Sheet: References
Supporting Information 3 (1)
References and abbrevations:
Anderberg, A (coordinator, 2017) Den virtuelle floran. Last accessed 04-05-2018. http://linnaeus.nrm.se/flora/
Besnard G (2016) Origin and Domestication. In: The Olive Tree Genome. (eds Rugini E, Baldoni L, Muleo R, Sebastiani L). Cham, Switzerland, Springer Nature. Pages 1–2.
Bolinder K, Norbäck Ivarsson L, Humphreys AM, Ickert-Bond SM, Hoorn C, Rydin C (2016) Pollen morphology of Ephedra (Gnetales) and its evolutionary implications. Grana, 55, 24–51.
Browicz K, Zieliński J (1982-1994) Chorology of Trees and Shrubs in South-West Asia and Adjacent Regions. 10 vols, Poznan, Polish Scientific Publishers.
Brückner P (1993) Pollen morphology and taxonomy of Eurasiatic species of the genus Buxus (Buxaceae). Grana, 31, 65–78.
Caudullo G, Welk E, San-Miguel-Ayanz J (2017) Chorological maps for the main European woody species. Data in Brief, 12, 662–666.
Christenhusz MJM (2013) Twins are not alone: a recircumscription of Linnaea (Caprifoliaceae). Phytotaxa, 125, 25–32.
Clement WL, Donoghue MJ (2012) Barcoding success as a function of phylogenetic relatedness in Viburnum, a clade of woody angiosperms. BMC Evolutionary Biology, 2012, 73.
Corbett SL, Manchester SR (2004) Phytogeography and fossil history of Ailantus (Simaroubaceae). Internatioonal Journal of Plant Sciences, 165, 671–690.
Critchfield WB, Little EL (1966) Geographic distribution of the pines of the world, U.S.D.A. Forest Service Miscellaneous Publication.
Danin A, Fragman, O (2016 onwards) Flora of Israel Online. Last accessed 04-05-2018. http://flora.org.il/en/plants/
EUFORGEN (2018) European Forest Genetic Resources Programme. Last accessed 04-05-2018. http://www.euforgen.org/species/
Fang J, Wang Z, Tang Z (2011) Atlas of Woody Plants in China. Volumes 1 to 3 and index., Beijing, Higher Education Press.
Farjon A (2005a) A monograph of Cupressaceae and Sciadopitys, Kew, Kew Royal Botanic Gardens.
Farjon A (2005b) Pines – Drawings and description of the genus Pinus, Leiden, Boston, Brill.
Farjon A (2010) A handbook of the world’s conifers, Leiden, E. J. Brill.
Ferrufino-Acosta L (2010) Taxonomic revision of the genus Smilax (Smilacaceae) in Central America and the Caribbean Islands. Willdenowia, 40, 227–280.
Flora of China (2014) eFloras: Flora of China. Missouri Botanical Garden, St. Louis, MO & Harvard University Herbaria, Cambridge, MA. Last accessed 04-05-2018. http://www.efloras.org/flora_page.aspx?flora_id=2
Flora of North America (2004 onwards) eFloras: Flora of North America. Missouri Botanical Garden, St. Louis, MO & Harvard University Herbaria, Cambridge, MA. Last accessed 04-05-2018. http://www.efloras.org/flora_page.aspx?flora_id=1
Gardener M, Thomas P (2018) Threatened conifers of the world. Last accessed 04-05-2018. http://threatenedconifers.rbge.org.uk/
GBIF (2018) Global Biodiversity Information Facility. Last accessed 04-05-2018. https://www.gbif.org/
Grimm GW, Denk T, Hemleben V (2007) Evolutionary history and systematic of Acer section Acer - a case study of low-level phylogenetics. Plant Systematics and Evolution, 267, 215-253.
Harley MM (1991) The pollen morphology of the Sapotaceae. Kew Bulletin, 46, 379–491.
Hélardot, J-L (2018) Oaks of the world. Last accessed 04-05-2018. http://oaks.of.the.world.free.fr/index.htm
Heuertz M, Carenvale S, Fineschi S, Sebastiani F, Hausman F, Paule L, Vendramin GG (2006) Chloroplast DNA phylogeography of European ashes, Fraxinus sp. (Oleaceae): roles of hybridization and life history traits. Molecular Ecology, 15, 2131–2140.
Hinsinger DD, Basak J, Gaudeul M, Cruaud C, Bertolino P, Frascaria-Lacoste N, Bousquet J (2013) The Phylogeny and Biogeographic History of Ashes (Fraxinus, Oleaceae) Highlight the Roles of Migration and Vicariance in the Diversification of Temperate Trees. PLoS ONE, 8, 1–14.
Ickert-Bond SM, Pigg KB, Wen J (2007) Comparative infructescence morphology in Altingia (Altingiaceae) and discordance between morphological and molecular phylogenies. American Journal of Botany, 94, 1094–1115.
Kim Y-D, Kim S-H, Landrum LR (2004) Taxonomic and phytogeographic implications from ITS phylogeny in Berberis (Berberidaceae). Journal of Plant Research, 117, 174–182.
Ohwi J (1965) Flora of Japan. Washington D.C., Smithonian Publishing. 1110 pages
Pigott D (2012) Lime-trees and Basswoods - A biological monograph of the genus Tilia, Cambridge, UK, Cambridge University Press. 394 pages
PLANTS Database (2018) United States Department of Agriculture, Natural Resources Conservation Service, PLANT Database. Last accessed 04-05-2018. https://plants.usda.gov/java/
Swenson U, Anderberg AA (2005) Phylogeny, character evolution, and classification of Sapotaceae (Ericales). Cladistics, 21, 101–130.
Thompson RS, Anderson KH, Bartlein PJ (1999a) Atlas of relations between climatic parameters and distribution of important trees and shrubs in North America — Hardwoods. U.S. Geological Survey Professional Paper, 1650–B, 1-423.
Thompson RS, Anderson KH, Bartlein PJ (1999b) Atlas of relations between climatic parameters and distributions of important trees and shrubs in North America — Introduction and Conifers. U.S. Geological Survey Professional Paper, 1650–A, 1-269.
Thompson RS, Anderson KH, Bartlein PJ (2001) Atlas of relations between climatic parameters and distributions of important trees and shrubs in North America — Additional conifers, hardwoods, and monocots. U.S. Geological Survey Professional Paper, 1650–C, 1-386.
Tropicos.org 2018. Missouri Botanical Garden - Flora of Pakistan. Last accessed 04-05-2018. http://www.tropicos.org/Project/Pakistan
Van Gelderen DM, De Jong PC, Oterdoom HJ (1994) Maples of the world, Portland, OR, Timber Press. $%( pages.
Von Balthazar M, Endress PK, Qiu YL (2000) Phylogenetic relations in Buxaceae based on nuclear internal transcribed spacers and plastid ndhF sequences. International Journal of Plant Sciences, 161, 785–792.
Villaseñor, J L (2016) Checklist of the native vascular plants of Mexico. Revista Mexicana de Biodiversidad, 87, 559–902
Winkworth RC, Donoghue MJ (2005) Viburnum phylogeny based on combined molecular data: implications for taxonomy and biogeography. American Journal of Botany, 92, 653–666.
Zhang J-B, Li R-Q, Xiang X-G et al. (2013) Integrated fossil and molecular data reveal the biogeographic diversification of the eastern Asian-eastern North American disjunct hickory genus (Carya Nutt.). PLoS ONE, 8, e70449.
(CVPM) Checklist of the native vascular plants Mexico
(DVF) Den virtuelle floran
(EUFORGEN) European Forest Genetic Resources Programme
(GBIF) Global Biodiversity Information Facility
(FNA) Flora of North America
(FOC) Flora of China
(FOI) Flora of Israel
(FOJ) Flora of Japan
(FOP) Flora of Pakisatan
(OOTW) Oaks of the world
(PDB) PLANTS Database
(TCW) Threatened conifers of the world
(NA) North America
(SA) South America
(Afr) Africa
(Med) Mediterranean
(CA) Central America
(EURA) Eurasia
(EAsia) East Asia
(POLY) Polynesia
(CARIB) Caribbian
