# Supplementary material for: Middle Miocene climate of southwestern Anatolia from multiple botanical proxies
Source: Copernicus journal article supplement (doi:10.5194/cp-2018-76), 2018-07-09
Supplement: Supplementary file 2 [file Bouchal et al S_2.pdf › Bouchal et al S_2.pdf]

## Descripton of Köppen-Geiger climate symbols and defining criteria (Peel et al., 2007)

| 1st | 2nd | 3 <sup>rd</sup> | Description and criteria                                                                                                        |
|-----|-----|-----------------|---------------------------------------------------------------------------------------------------------------------------------|
| A   |     |                 | equatorial / tropical ( $T_{\text{cold}} \geq 18^{\circ}\text{C}$ )                                                             |
|     | f   |                 | rainforest, fully humid ( $P_{\text{dry}} \geq 60\text{mm}$ )                                                                   |
|     | m   |                 | monsoonal (not Af & $P_{\text{dry}} \geq 100 - \text{MAP}/25$ )                                                                 |
|     | s   |                 | savannah with dry summer ( $P_{\text{sdry}} < 60\text{ mm}$ )                                                                   |
|     | w   |                 | savannah with dry winter ( $P_{\text{wdry}} < 60\text{ mm}$ )                                                                   |
| B   |     |                 | arid ( $\text{MAP} < 10 \times P_{\text{threshold}}$ )                                                                          |
|     | W   |                 | desert ( $\text{MAP} < 5 \times P_{\text{threshold}}$ )                                                                         |
|     | S   |                 | steppe ( $\text{MAP} \geq 5 \times P_{\text{threshold}}$ )                                                                      |
|     | h   |                 | hot arid ( $\text{MAT} \geq 18^{\circ}\text{C}$ )                                                                               |
|     | k   |                 | cold arid ( $\text{MAT} < 18^{\circ}\text{C}$ )                                                                                 |
| C   |     |                 | warm temperate/temperate ( $T_{\text{hot}} > 10^{\circ}\text{C}$ & $0^{\circ}\text{C} < T_{\text{cold}} < 18^{\circ}\text{C}$ ) |
| D   |     |                 | snow / cold ( $T_{\text{hot}} > 10^{\circ}\text{C}$ & $T_{\text{cold}} \leq 0^{\circ}\text{C}$ )                                |
|     | s   |                 | summer dry ( $P_{\text{sdry}} < 40$ & $P_{\text{sdry}} < P_{\text{wwet}}/3$ )                                                   |
|     | w   |                 | winter dry ( $P_{\text{wdry}} < P_{\text{swet}}/10$ )                                                                           |
|     | f   |                 | fully humid / without a dry season (not s or w)                                                                                 |
|     | a   |                 | hot summer ( $T_{\text{hot}} \geq 22^{\circ}\text{C}$ )                                                                         |
|     | b   |                 | warm summer (not a & $1 \leq T_{\text{mon}10} < 4$ )                                                                            |
|     | c   |                 | cool / cold summer (not a or b & $T_{\text{mon}10} \geq 4$ )                                                                    |
|     | d   |                 | extremely continental / very cold winter<br>(not a or b & $T_{\text{cold}} < -38^{\circ}\text{C}$ )                             |
| E   |     |                 | polar ( $T_{\text{hot}} < 10^{\circ}\text{C}$ )                                                                                 |
|     | T   |                 | polar tundra ( $T_{\text{hot}} \leq 10^{\circ}\text{C}$ )                                                                       |

MAP = mean annual precipitation, MAT = mean annual temperature,  $T_{\text{hot}}$  = temperature of the hottest month,  $T_{\text{cold}}$  = temperature of the coldest month,  $T_{\text{mon}10}$  = number of months where the temperature is above  $10^{\circ}\text{C}$ ,  $P_{\text{dry}}$  = precipitation of the driest month,  $P_{\text{sdry}}$  = precipitation of the driest month in summer,  $P_{\text{wdry}}$  = precipitation of the driest month in winter,  $P_{\text{swet}}$  = precipitation of the wettest month in summer,  $P_{\text{wwet}}$  = precipitation of the wettest month in winter,  $P_{\text{threshold}}$  = varies according to the following rules (if 70% of MAP occurs in winter then  $P_{\text{threshold}} = 2 \times \text{MAT}$ , if 70% of MAP occurs in summer then  $P_{\text{threshold}} = 2 \times \text{MAT} + 28$ , otherwise  $P_{\text{threshold}} = 2 \times \text{MAT} + 14$ ). Summer (winter) is defined as the warmer (cooler) six months period of ONDJFM and AMJJAS.
