# Supplementary material for: Middle Miocene climate of southwestern Anatolia from multiple botanical proxies
Source: Copernicus journal article supplement (doi:10.5194/cp-2018-76), 2018-07-09
Supplement: Supplementary file 4 [file Bouchal et al S_5 percent_climtypes.pdf › Bouchal et al S_5 percent_climtypes.pdf]

| Locality, Pollen zone                          | Af         | Am         | As         | Aw         | Cfa        | Cfb        | Cfc        | Dfa        | Dfb        | Dfc        | Dfd        | Cwa        | Cwb        | Dwa        | Dwb        | Dwc        | ET         | Csa        | Csb        | Dsa        | Dsb        | Dsc        | BSh        | BSk        | BWh        | BWk        |
|------------------------------------------------|------------|------------|------------|------------|------------|------------|------------|------------|------------|------------|------------|------------|------------|------------|------------|------------|------------|------------|------------|------------|------------|------------|------------|------------|------------|------------|
| PZ1 YB (66 taxa)                               | 0,0228577  | 0,02976187 | 0,01390415 | 0,04449231 | 0,1317274  | 0,10371851 | 0,01927874 | 0,02585959 | 0,04975189 | 0,02542783 | 0,00962935 | 0,09736716 | 0,09083101 | 0,02346972 | 0,02860686 | 0,02222162 | 0,01647232 | 0,04985793 | 0,04831095 | 0,01492717 | 0,01815199 | 0,01481068 | 0,0252932  | 0,03371773 | 0,02174901 | 0,01780333 |
| PZ1 Salipasalar (48 taxa)                      | 0,01973979 | 0,02512419 | 0,01407211 | 0,03696801 | 0,13882759 | 0,11341191 | 0,01725744 | 0,02657439 | 0,05306619 | 0,02666976 | 0,01000318 | 0,08600508 | 0,0857153  | 0,02274757 | 0,02975264 | 0,02215665 | 0,018218   | 0,05684034 | 0,04627013 | 0,01554015 | 0,01959561 | 0,01611954 | 0,02444896 | 0,03474725 | 0,02137766 | 0,01875056 |
| PZ1 Tinaz (44 taxa)                            | 0,02174466 | 0,02023068 | 0,0115245  | 0,0432375  | 0,148366   | 0,1131088  | 0,01655573 | 0,02417651 | 0,05024938 | 0,02419049 | 0,00829018 | 0,09254231 | 0,08817616 | 0,02050603 | 0,02635563 | 0,01874388 | 0,01416892 | 0,05743928 | 0,05579273 | 0,01333264 | 0,0171776  | 0,01398177 | 0,02241484 | 0,03199043 | 0,0196888  | 0,01704156 |
| PZ1 Eskihisar (57 taxa)                        | 0,02163208 | 0,02676373 | 0,01190757 | 0,04021956 | 0,13663008 | 0,10829634 | 0,01865129 | 0,02589658 | 0,05258771 | 0,0245692  | 0,00842373 | 0,09980757 | 0,09477438 | 0,02207356 | 0,02710796 | 0,02132011 | 0,01479838 | 0,05158568 | 0,05180069 | 0,01378776 | 0,01695321 | 0,01315286 | 0,02502854 | 0,03365509 | 0,02138977 | 0,01718658 |
| PZ2 YB (66 taxa)                               | 0,02711581 | 0,0296667  | 0,01678062 | 0,04103704 | 0,13413246 | 0,10495389 | 0,02044345 | 0,02729507 | 0,05002401 | 0,02575607 | 0,00902329 | 0,08876079 | 0,08727558 | 0,02611638 | 0,03233303 | 0,02355098 | 0,01712826 | 0,05008267 | 0,04883334 | 0,01434636 | 0,01823896 | 0,01491698 | 0,02338953 | 0,03262427 | 0,01986955 | 0,01630494 |
| PZ2 Salipasalar (53 taxa)                      | 0,02638969 | 0,02844468 | 0,01407635 | 0,04025047 | 0,13649258 | 0,1076514  | 0,01955191 | 0,02571995 | 0,04990855 | 0,02571214 | 0,00830476 | 0,08729797 | 0,08701133 | 0,02504907 | 0,03114951 | 0,02339203 | 0,01604316 | 0,05079437 | 0,05292818 | 0,01414733 | 0,01877118 | 0,01446166 | 0,02445307 | 0,03416454 | 0,0207211  | 0,01711303 |
| PZ2 Tinaz (51 taxa)                            | 0,01840098 | 0,02346495 | 0,01146085 | 0,03639051 | 0,1426549  | 0,11400306 | 0,01851006 | 0,02681782 | 0,05441246 | 0,02540372 | 0,00787629 | 0,0903347  | 0,09177722 | 0,02219677 | 0,02951543 | 0,02301312 | 0,01533055 | 0,05372392 | 0,05418704 | 0,01387139 | 0,01826176 | 0,0140143  | 0,02347378 | 0,03333496 | 0,02047998 | 0,01708949 |
| PZ2 Eskihisar (51 taxa)                        | 0,01840098 | 0,02346495 | 0,01146085 | 0,03639051 | 0,1426549  | 0,11400306 | 0,01851006 | 0,02681782 | 0,05441246 | 0,02540372 | 0,00787629 | 0,0903347  | 0,09177722 | 0,02219677 | 0,02951543 | 0,02301312 | 0,01533055 | 0,05372392 | 0,05418704 | 0,01387139 | 0,01826176 | 0,0140143  | 0,02347378 | 0,03333496 | 0,02047998 | 0,01708949 |
| Macroflora YB (44 taxa + Koelreuteria)         | 0,01335184 | 0,02448166 | 0,00968097 | 0,0416846  | 0,17954986 | 0,12190986 | 0,00858818 | 0,0224418  | 0,04575602 | 0,01900623 | 0,00430769 | 0,12309286 | 0,11498284 | 0,02030186 | 0,03290329 | 0,02650766 | 0,00883035 | 0,06493981 | 0,03516711 | 0,00809512 | 0,0108155  | 0,00601312 | 0,01165799 | 0,02756534 | 0,00845308 | 0,00991535 |
| Macroflora YB (44 taxa + Sapindus)             | 0,01478188 | 0,02683762 | 0,00968097 | 0,04404057 | 0,17857249 | 0,12016089 | 0,00858818 | 0,0197669  | 0,04308112 | 0,01818319 | 0,00430769 | 0,12812373 | 0,1200137  | 0,01783273 | 0,02961111 | 0,02403853 | 0,00883035 | 0,06493981 | 0,03516711 | 0,00809512 | 0,0108155  | 0,00601312 | 0,01196663 | 0,02787398 | 0,00876172 | 0,00991535 |
| Macroflora Salipasalar (15 taxa)               | 0,02019062 | 0,0362763  | 0,0096682  | 0,04778436 | 0,13527845 | 0,11819807 | 0,01460946 | 0,01957567 | 0,05506937 | 0,02395353 | 0,00512821 | 0,11598547 | 0,12221574 | 0,01840165 | 0,04232257 | 0,02641499 | 0,0098221  | 0,04401288 | 0,04261451 | 0,00831192 | 0,01489583 | 0,00823274 | 0,01087559 | 0,03048629 | 0,0088695  | 0,01080598 |
| Macroflora Tinaz (39 taxa + Koelreuteria)      | 0,01916922 | 0,02658728 | 0,01012095 | 0,04128697 | 0,14870602 | 0,12619461 | 0,01177051 | 0,02242853 | 0,05366722 | 0,02831459 | 0,0048464  | 0,09719113 | 0,09692187 | 0,02054351 | 0,03339508 | 0,0226557  | 0,010573   | 0,05677602 | 0,04138223 | 0,00919351 | 0,01455442 | 0,00719687 | 0,01645348 | 0,03382584 | 0,03760309 | 0,00864194 |
| Macroflora Tinaz (39 taxa + Sapindus)          | 0,02017087 | 0,02887105 | 0,01012095 | 0,04357074 | 0,14814509 | 0,12435157 | 0,01177051 | 0,01930337 | 0,05054206 | 0,02675201 | 0,0048464  | 0,01678554 | 0,01040928 | 0,01898093 | 0,03026992 | 0,02109312 | 0,010573   | 0,05677602 | 0,04138223 | 0,00919351 | 0,01455442 | 0,00719687 | 0,01709454 | 0,0344669  | 0,03824415 | 0,00864194 |
| Macrofossil Eskihisar (38 taxa + Koelreuteria) | 0,01652669 | 0,0308121  | 0,01107293 | 0,04216059 | 0,15301376 | 0,13278128 | 0,00982096 | 0,02740332 | 0,05575527 | 0,02317215 | 0,00299818 | 0,1037201  | 0,09916302 | 0,01879143 | 0,03423881 | 0,02336564 | 0,00837988 | 0,05285372 | 0,03687409 | 0,00688353 | 0,0118922  | 0,00600569 | 0,01537402 | 0,03343779 | 0,03497144 | 0,00853141 |
| Macrofossil Eskihisar (38 taxa + Sapindus)     | 0,01755403 | 0,03315443 | 0,01107293 | 0,04450292 | 0,15243845 | 0,13089098 | 0,00982096 | 0,02419803 | 0,05254998 | 0,0215695  | 0,00299818 | 0,10832258 | 0,10376549 | 0,01718878 | 0,03103351 | 0,02176299 | 0,00837988 | 0,05285372 | 0,03687409 | 0,00688353 | 0,0118922  | 0,00600569 | 0,01603152 | 0,03409529 | 0,03562893 | 0,00853141 |
| PZ2/3 Tinaz (42 taxa)                          | 0,01385765 | 0,01906604 | 0,0110241  | 0,03016779 | 0,13876523 | 0,10911086 | 0,01817239 | 0,02869    | 0,05610733 | 0,02827953 | 0,00956407 | 0,08333846 | 0,08522037 | 0,02235531 | 0,02926372 | 0,02380783 | 0,01668442 | 0,05769589 | 0,05559301 | 0,01626938 | 0,02029743 | 0,01372397 | 0,02705957 | 0,03870102 | 0,02453731 | 0,02264733 |
| Yenieskihilar (28 taxa)                        | 0,01627027 | 0,01938515 | 0,01339611 | 0,0313889  | 0,17487738 | 0,10673618 | 0,01780262 | 0,02162431 | 0,04879186 | 0,02601965 | 0,00710623 | 0,08778751 | 0,08153737 | 0,01869461 | 0,0251958  | 0,01821902 | 0,01435995 | 0,0684694  | 0,06501937 | 0,01380398 | 0,02157822 | 0,01264615 | 0,02567501 | 0,03172379 | 0,01831019 | 0,01358102 |
|                                                | Af/Am      | As/Aw      | Cf         | Df         | Cw         | Dw         | ET         | Cs         | Ds         | BS         | BW         |            |            |            |            |            |            |            |            |            |            |            |            |            |            |            |
| PZ1 YB (66 taxa)                               | 0,05261957 | 0,05839646 | 0,25472465 | 0,11066866 | 0,18819816 | 0,0742982  | 0,01647232 | 0,09816888 | 0,04788984 | 0,05901093 | 0,03955234 |            |            |            |            |            |            |            |            |            |            |            |            |            |            |            |
| PZ1 Salipasalar (48 taxa)                      | 0,04486398 | 0,05104012 | 0,26949694 | 0,11631352 | 0,17172038 | 0,07465686 | 0,018218   | 0,10311048 | 0,05125529 | 0,05919621 | 0,04012822 |            |            |            |            |            |            |            |            |            |            |            |            |            |            |            |
| PZ1 Tinaz (44 taxa)                            | 0,05094834 | 0,054762   | 0,27803053 | 0,10690655 | 0,18071848 | 0,06560554 | 0,01416892 | 0,11233201 | 0,04449201 | 0,05440526 | 0,03673036 |            |            |            |            |            |            |            |            |            |            |            |            |            |            |            |
| PZ1 Eskihisar (57 taxa)                        | 0,0483981  | 0,05212713 | 0,26357771 | 0,11147722 | 0,19458195 | 0,07050163 | 0,01479838 | 0,10338637 | 0,04389383 | 0,05868363 | 0,03857635 |            |            |            |            |            |            |            |            |            |            |            |            |            |            |            |
| PZ2 YB (66 taxa)                               | 0,05678251 | 0,05781766 | 0,2595298  | 0,11209843 | 0,17603637 | 0,08200038 | 0,01712826 | 0,09891601 | 0,0475023  | 0,0560138  | 0,03617449 |            |            |            |            |            |            |            |            |            |            |            |            |            |            |            |
| PZ2 Salipasalar (53 taxa)                      | 0,05483437 | 0,05432682 | 0,26369588 | 0,10964541 | 0,1743093  | 0,0795906  | 0,01604316 | 0,10372255 | 0,04738018 | 0,05861761 | 0,03783412 |            |            |            |            |            |            |            |            |            |            |            |            |            |            |            |
| PZ2 Tinaz (51 taxa)                            | 0,04186593 | 0,04785136 | 0,27516803 | 0,11451029 | 0,18211192 | 0,07472531 | 0,01533055 | 0,10791096 | 0,04614745 | 0,05680874 | 0,03756947 |            |            |            |            |            |            |            |            |            |            |            |            |            |            |            |
| PZ2 Eskihisar (51 taxa)                        | 0,04186593 | 0,04785136 | 0,27516803 | 0,11451029 | 0,18211192 | 0,07472531 | 0,01533055 | 0,10791096 | 0,04614745 | 0,05680874 | 0,03756947 |            |            |            |            |            |            |            |            |            |            |            |            |            |            |            |
| Macroflora YB (44 taxa + Koelreuteria)         | 0,0378335  | 0,05136557 | 0,31004791 | 0,09151174 | 0,2380757  | 0,07971282 | 0,00883035 | 0,10010693 | 0,02492374 | 0,03922333 | 0,01836843 |            |            |            |            |            |            |            |            |            |            |            |            |            |            |            |
| Macroflora YB (44 taxa + Sapindus)             | 0,04161951 | 0,05372154 | 0,30732157 | 0,0853389  | 0,24813743 | 0,07148236 | 0,00883035 | 0,10010693 | 0,02492374 | 0,03984061 | 0,01867708 |            |            |            |            |            |            |            |            |            |            |            |            |            |            |            |
| Macroflora Salipasalar (15 taxa)               | 0,05646692 | 0,05745256 | 0,26808598 | 0,10372677 | 0,23820121 | 0,08713922 | 0,0098221  | 0,08662739 | 0,03144049 | 0,04136188 | 0,01967547 |            |            |            |            |            |            |            |            |            |            |            |            |            |            |            |
| Macroflora Tinaz (39 taxa + Koelreuteria)      | 0,0457565  | 0,05140793 | 0,28667113 | 0,10925674 | 0,194113   | 0,0765943  | 0,010573   | 0,09815824 | 0,0309448  | 0,05027933 | 0,04624504 |            |            |            |            |            |            |            |            |            |            |            |            |            |            |            |
| Macroflora Tinaz (39 taxa + Sapindus)          | 0,04904192 | 0,0536917  | 0,28426716 | 0,10144385 | 0,20308782 | 0,07034398 | 0,010573   | 0,09815824 | 0,0309448  | 0,05156144 | 0,0468861  |            |            |            |            |            |            |            |            |            |            |            |            |            |            |            |
| Macrofossil Eskihisar (38 taxa + Koelreuteria) | 0,04733879 | 0,05323352 | 0,295616   | 0,10932893 | 0,20288312 | 0,07639588 | 0,00837988 | 0,08972781 | 0,02478142 | 0,04881182 | 0,04350284 |            |            |            |            |            |            |            |            |            |            |            |            |            |            |            |
| Macrofossil Eskihisar (38 taxa + Sapindus)     | 0,05070846 | 0,05557585 | 0,29315039 | 0,10131569 | 0,21208807 | 0,06998529 | 0,00837988 | 0,08972781 | 0,02478142 | 0,05012681 | 0,04416034 |            |            |            |            |            |            |            |            |            |            |            |            |            |            |            |
| PZ2/3 Tinaz (42 taxa)                          | 0,03292369 | 0,0411919  | 0,26604847 | 0,12264093 | 0,16855883 | 0,07542686 | 0,01668442 | 0,11328891 | 0,05029078 | 0,06576059 | 0,04718464 |            |            |            |            |            |            |            |            |            |            |            |            |            |            |            |
| Yenieskihilar (28 taxa)                        | 0,03565542 | 0,044785   | 0,29941617 | 0,10354204 | 0,16932487 | 0,06210943 | 0,01435995 | 0,13348877 | 0,04802834 | 0,0573988  | 0,03189121 |            |            |            |            |            |            |            |            |            |            |            |            |            |            |            |
|                                                | A          | B          | C          | D          | ET         |            |            |            |            |            |            |            |            |            |            |            |            |            |            |            |            |            |            |            |            |            |
| PZ1 YB (66 taxa)                               | 0,11101603 | 0,09856327 | 0,54109169 | 0,2328567  | 0,01647232 |            |            |            |            |            |            |            |            |            |            |            |            |            |            |            |            |            |            |            |            |            |
| PZ1 Salipasalar (48 taxa)                      | 0,09590409 | 0,09932443 | 0,5443278  | 0,24222567 | 0,018218   |            |            |            |            |            |            |            |            |            |            |            |            |            |            |            |            |            |            |            |            |            |
| PZ1 Tinaz (44 taxa)                            | 0,10571034 | 0,09113562 | 0,57198102 | 0,2170041  | 0,01416892 |            |            |            |            |            |            |            |            |            |            |            |            |            |            |            |            |            |            |            |            |            |
| PZ1 Eskihisar (57 taxa)                        | 0,10052294 | 0,09725998 | 0,56154602 | 0,22587267 | 0,01479838 |            |            |            |            |            |            |            |            |            |            |            |            |            |            |            |            |            |            |            |            |            |
| PZ2 YB (66 taxa)                               | 0,11460016 | 0,0921883  | 0,53448218 | 0,24160111 | 0,01712826 |            |            |            |            |            |            |            |            |            |            |            |            |            |            |            |            |            |            |            |            |            |
| PZ2 Salipasalar (53 taxa)                      | 0,1        |            |            |            |            |            |            |            |            |            |            |            |            |            |            |            |            |            |            |            |            |            |            |            |            |            |
