# Supplementary material for: Middle Miocene climate of southwestern Anatolia from multiple botanical proxies
Source: Copernicus journal article supplement (doi:10.5194/cp-2018-76), 2018-07-09

# Taxa list without gymnosperms

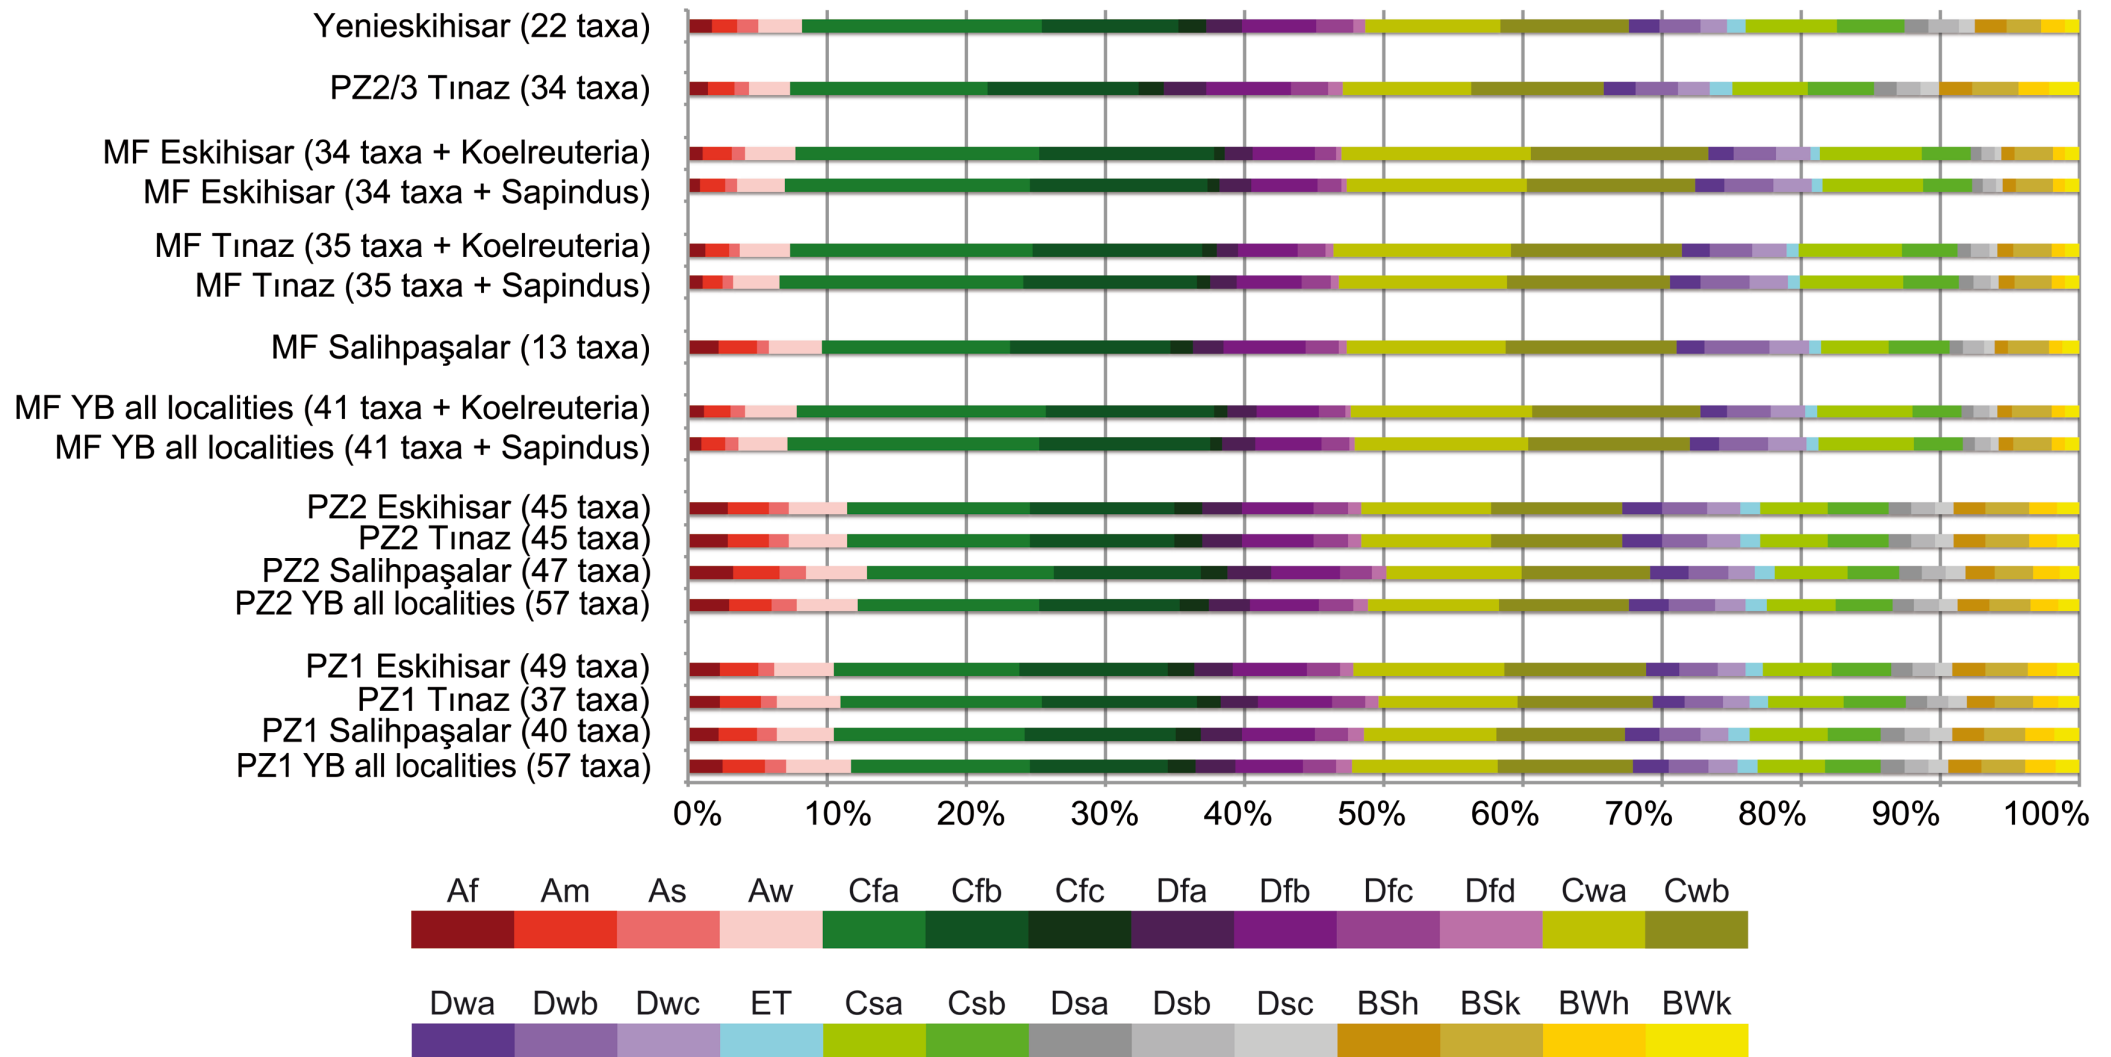

# Taxa list without purely azonal elements

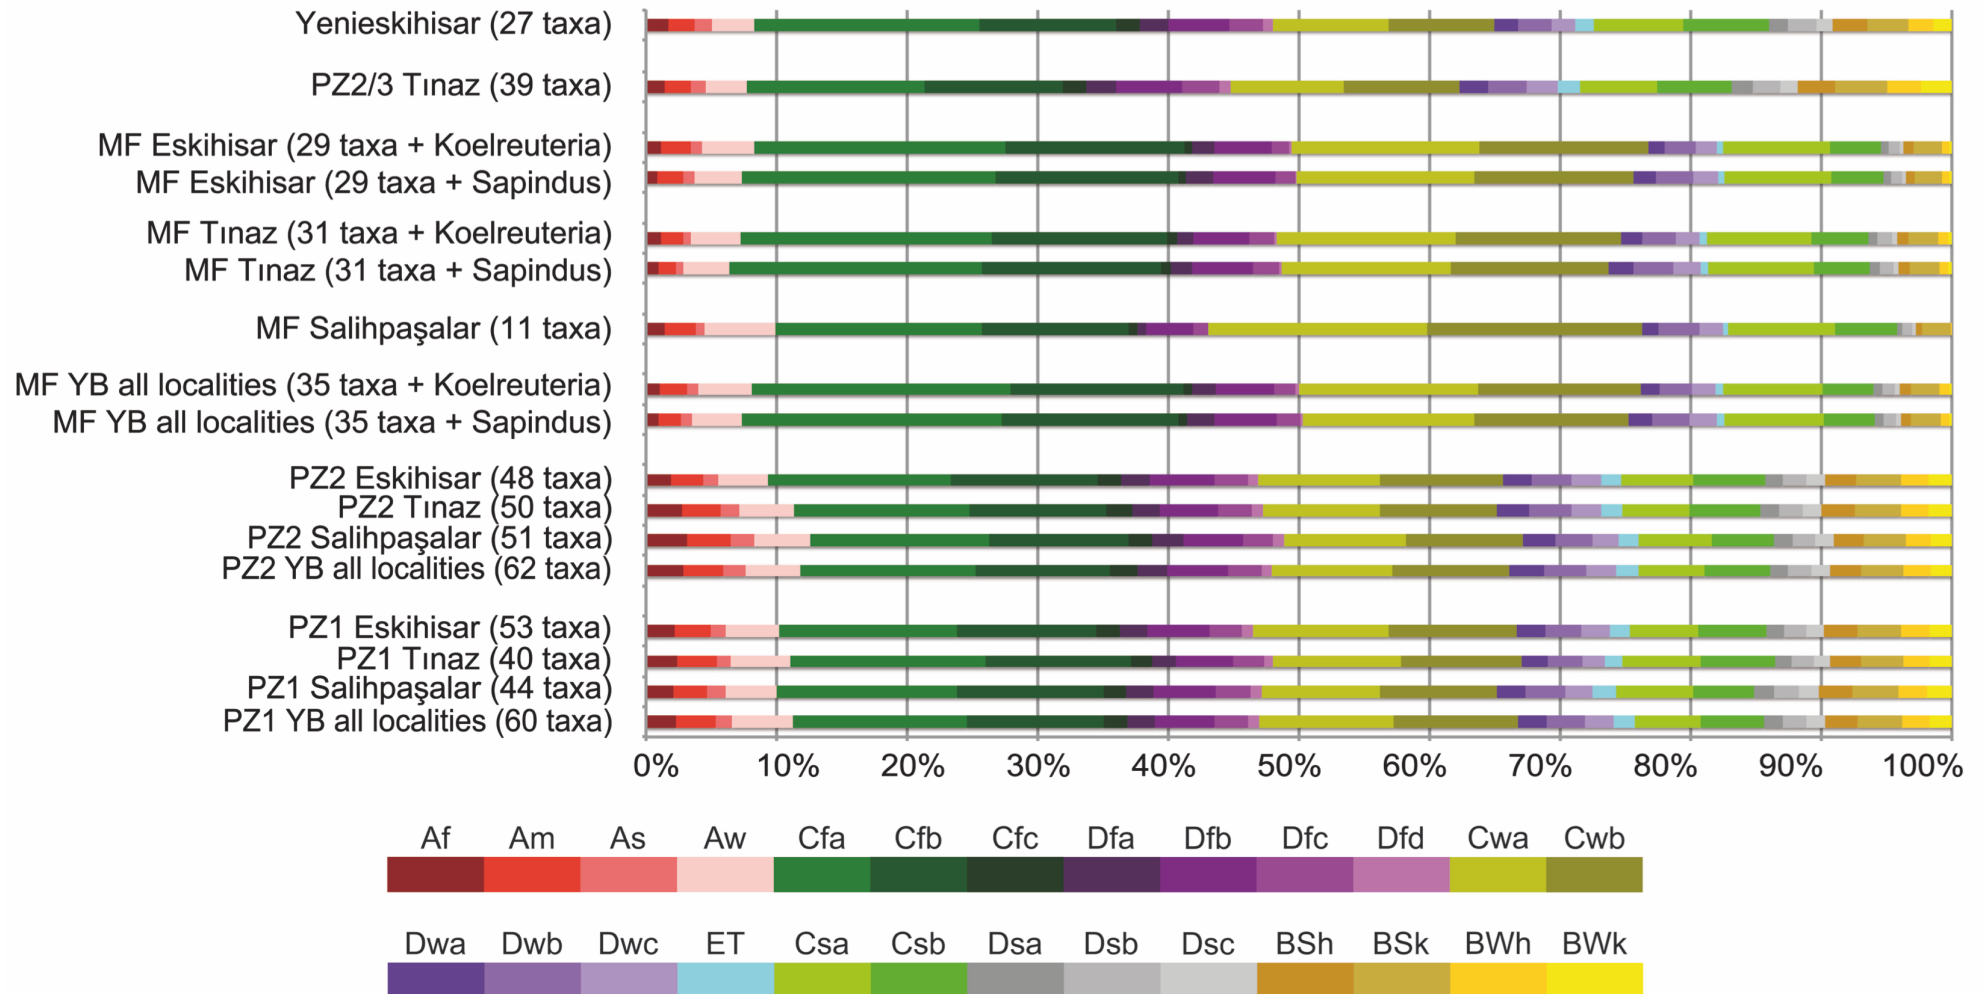

# Taxa list without cosmopolitan elements

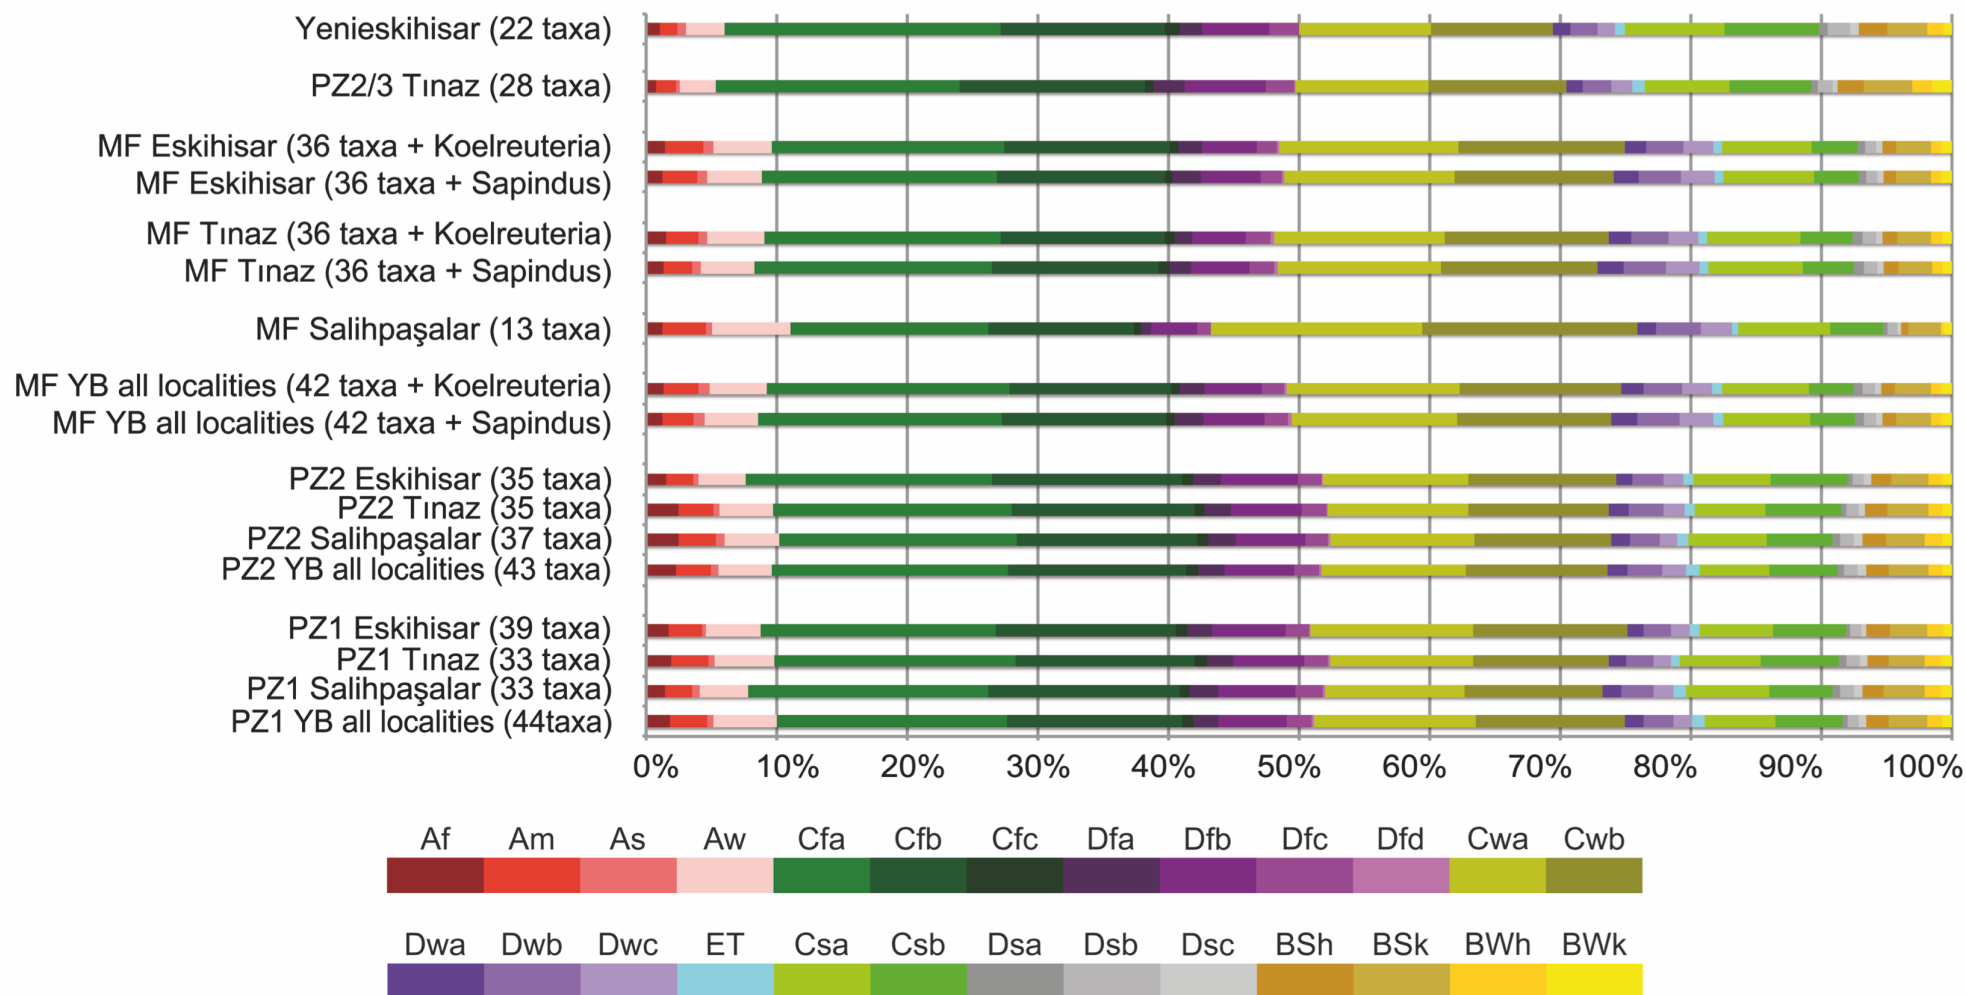

Supplement: Supplementary file 5 [file Bouchal et al S_6 add_Koppsig diagrOPZ3.pdf › Bouchal et al S_6 add_Koppsig diagrOPZ3.pdf]
